# Supplementary material for: Diversity Analysis and Function Prediction of Bacterial Communities in the Different Colored Pericarp of Citrus reticulata cv. ‘Shatangju’ Due to ‘Candidatus Liberibacter asiaticus’ Infection
Source: Int J Mol Sci. 2023 Jul 14;24(14):11472. doi: 10.3390/ijms241411472 (PMC10380603; doi:10.3390/ijms241411472)
Supplement: Supplementary file 1 [file ijms-24-11472-s001.zip › Supplementary Table S1.xlsx]

## Sheet: ASV Species Classification Info
Domain	Kingdom	Phylum	Class	Order	Family	Genus	Species	ASV	SUM	Percent	WDYF1	WDYF2	WDYF3	WDYF4	WGF1	WGF2	WGF3	WGF4	TYBGF1	TYBGF2	TYBGF3	TYBGF4	WLYF1	WLYF2	WLYF3	WLYF4
d__Bacteria	k__norank_d__Bacteria	p__Proteobacteria	c__Alphaproteobacteria	o__Rhizobiales	f__Rhizobiaceae	g__Candidatus_Liberibacter	s__unclassified_g__Candidatus_Liberibacter	ASV1	565815	0.640155	40	0	252	189	42774	45723	32734	35808	52807	42267	52982	50969	53901	51627	50195	53547
d__Bacteria	k__norank_d__Bacteria	p__Proteobacteria	c__Gammaproteobacteria	o__Burkholderiales	f__Rhodocyclaceae	g__unclassified_f__Rhodocyclaceae	s__unclassified_f__Rhodocyclaceae	ASV36	10176	0.011513	614	600	5649	2969	41	25	160	51	5	0	23	15	0	18	0	6
d__Bacteria	k__norank_d__Bacteria	p__Proteobacteria	c__Alphaproteobacteria	o__Sphingomonadales	f__Sphingomonadaceae	g__Sphingomonas	s__unclassified_g__Sphingomonas	ASV241	8769	0.00992112	0	0	0	0	0	0	0	0	12	8750	5	0	0	2	0	0
d__Bacteria	k__norank_d__Bacteria	p__Proteobacteria	c__Gammaproteobacteria	o__Burkholderiales	f__Comamonadaceae	g__Delftia	s__unclassified_g__Delftia	ASV3	7197	0.00814258	2170	388	387	895	276	280	959	532	51	86	157	341	72	302	291	10
d__Bacteria	k__norank_d__Bacteria	p__Firmicutes	c__Bacilli	o__Bacillales	f__Bacillaceae	g__Geobacillus	s__unclassified_g__Geobacillus	ASV2	6154	0.00696255	1303	8	281	185	319	511	1049	665	77	125	157	343	147	408	571	5
d__Bacteria	k__norank_d__Bacteria	p__Proteobacteria	c__Gammaproteobacteria	o__Burkholderiales	f__Comamonadaceae	g__unclassified_f__Comamonadaceae	s__unclassified_f__Comamonadaceae	ASV1550	4933	0.00558112	2214	458	909	1327	0	0	0	0	0	0	0	0	0	0	0	25
d__Bacteria	k__norank_d__Bacteria	p__Proteobacteria	c__Gammaproteobacteria	o__Pseudomonadales	f__Pseudomonadaceae	g__Pseudomonas	s__unclassified_g__Pseudomonas	ASV1992	4859	0.0054974	0	0	0	6	0	0	4853	0	0	0	0	0	0	0	0	0
d__Bacteria	k__norank_d__Bacteria	p__Proteobacteria	c__Gammaproteobacteria	o__Burkholderiales	f__Rhodocyclaceae	g__Thauera	s__unclassified_g__Thauera	ASV207	4463	0.00504937	461	104	2755	939	12	25	64	46	10	18	0	4	0	3	21	1
d__Bacteria	k__norank_d__Bacteria	p__Firmicutes	c__Bacilli	o__Staphylococcales	f__Staphylococcaceae	g__Staphylococcus	s__unclassified_g__Staphylococcus	ASV14	3954	0.0044735	3736	32	54	44	0	42	0	0	0	6	0	0	0	40	0	0
d__Bacteria	k__norank_d__Bacteria	p__Proteobacteria	c__Gammaproteobacteria	o__Burkholderiales	f__Burkholderiaceae	g__Ralstonia	s__unclassified_g__Ralstonia	ASV309	3476	0.0039327	1955	199	510	731	6	15	11	24	0	0	0	6	0	2	0	17
d__Bacteria	k__norank_d__Bacteria	p__Proteobacteria	c__Gammaproteobacteria	o__Burkholderiales	f__Rhodocyclaceae	g__Zoogloea	s__unclassified_g__Zoogloea	ASV67	2846	0.00321992	187	115	1638	760	22	22	53	0	0	0	34	6	0	9	0	0
d__Bacteria	k__norank_d__Bacteria	p__Actinobacteriota	c__Actinobacteria	o__Micrococcales	f__Micrococcaceae	g__Kocuria	s__unclassified_g__Kocuria	ASV1127	2431	0.0027504	77	0	0	1271	0	9	30	1037	0	0	0	0	0	0	7	0
d__Bacteria	k__norank_d__Bacteria	p__Firmicutes	c__Bacilli	o__Staphylococcales	f__Staphylococcaceae	g__Staphylococcus	s__unclassified_g__Staphylococcus	ASV1706	2203	0.00249244	2132	0	0	63	0	0	0	8	0	0	0	0	0	0	0	0
d__Bacteria	k__norank_d__Bacteria	p__Proteobacteria	c__Alphaproteobacteria	o__Rhizobiales	f__Rhizobiaceae	g__Candidatus_Liberibacter	s__unclassified_g__Candidatus_Liberibacter	ASV5	2232	0.00252525	0	0	0	0	215	168	105	349	273	0	127	198	179	201	223	194
d__Bacteria	k__norank_d__Bacteria	p__Actinobacteriota	c__Actinobacteria	o__Micrococcales	f__Microbacteriaceae	g__Curtobacterium	s__unclassified_g__Curtobacterium	ASV28	2276	0.00257503	708	1148	34	73	17	3	33	43	162	7	10	0	4	19	0	15
d__Bacteria	k__norank_d__Bacteria	p__Proteobacteria	c__Gammaproteobacteria	o__Enterobacterales	f__Enterobacteriaceae	g__Escherichia-Shigella	s__unclassified_g__Escherichia-Shigella	ASV16	1978	0.00223788	513	174	412	454	66	52	96	46	12	9	20	34	18	36	26	10
d__Bacteria	k__norank_d__Bacteria	p__Proteobacteria	c__Gammaproteobacteria	o__Burkholderiales	f__Burkholderiaceae	g__Burkholderia-Caballeronia-Paraburkholderia	s__unclassified_g__Burkholderia-Caballeronia-Paraburkholderia	ASV1558	1897	0.00214624	772	119	478	521	0	0	0	0	0	0	0	0	0	0	0	7
d__Bacteria	k__norank_d__Bacteria	p__Proteobacteria	c__Gammaproteobacteria	o__Burkholderiales	f__Aquaspirillaceae	g__Rivicola	s__unclassified_g__Rivicola	ASV187	1927	0.00218018	60	143	1269	429	0	6	0	0	0	3	7	2	0	3	5	0
d__Bacteria	k__norank_d__Bacteria	p__Bacteroidota	c__Bacteroidia	o__Bacteroidales	f__Bacteroidaceae	g__Bacteroides	s__unclassified_g__Bacteroides	ASV318	1845	0.00208741	0	0	0	0	557	325	626	163	34	70	26	0	15	0	29	0
d__Bacteria	k__norank_d__Bacteria	p__Proteobacteria	c__Alphaproteobacteria	o__Caulobacterales	f__Caulobacteraceae	g__Brevundimonas	s__unclassified_g__Brevundimonas	ASV41	1718	0.00194372	1043	71	135	276	22	47	42	32	3	0	9	9	0	13	10	6
d__Bacteria	k__norank_d__Bacteria	p__Proteobacteria	c__Gammaproteobacteria	o__Burkholderiales	f__Rhodocyclaceae	g__Zoogloea	s__unclassified_g__Zoogloea	ASV1564	1783	0.00201726	437	99	876	256	0	0	28	63	0	11	0	0	0	0	13	0
d__Bacteria	k__norank_d__Bacteria	p__Proteobacteria	c__Gammaproteobacteria	o__Enterobacterales	f__Enterobacteriaceae	g__unclassified_f__Enterobacteriaceae	s__unclassified_f__Enterobacteriaceae	ASV1549	1785	0.00201952	0	19	0	1750	0	0	0	0	0	0	0	16	0	0	0	0
d__Bacteria	k__norank_d__Bacteria	p__Proteobacteria	c__Alphaproteobacteria	o__Sphingomonadales	f__Sphingomonadaceae	g__Blastomonas	s__unclassified_g__Blastomonas	ASV2334	1855	0.00209872	0	0	0	0	0	0	0	0	0	1852	3	0	0	0	0	0
d__Bacteria	k__norank_d__Bacteria	p__Actinobacteriota	c__Actinobacteria	o__Corynebacteriales	f__Corynebacteriaceae	g__Corynebacterium	s__unclassified_g__Corynebacterium	ASV112	1497	0.00169368	727	90	32	437	0	47	91	30	0	7	0	17	2	5	6	6
d__Bacteria	k__norank_d__Bacteria	p__Proteobacteria	c__Alphaproteobacteria	o__Rhizobiales	f__Rhizobiaceae	g__Candidatus_Liberibacter	s__unclassified_g__Candidatus_Liberibacter	ASV324	1497	0.00169368	0	0	0	0	143	157	129	0	176	163	176	116	110	0	119	208
d__Bacteria	k__norank_d__Bacteria	p__Firmicutes	c__Bacilli	o__Exiguobacterales	f__Exiguobacteraceae	g__Exiguobacterium	s__unclassified_g__Exiguobacterium	ASV1555	1502	0.00169934	196	81	116	983	0	0	126	0	0	0	0	0	0	0	0	0
d__Bacteria	k__norank_d__Bacteria	p__Proteobacteria	c__Gammaproteobacteria	o__Burkholderiales	f__Rhodocyclaceae	g__Thauera	s__unclassified_g__Thauera	ASV1615	1419	0.00160544	0	20	1285	96	0	0	11	0	0	0	7	0	0	0	0	0
d__Bacteria	k__norank_d__Bacteria	p__Proteobacteria	c__Gammaproteobacteria	o__Enterobacterales	f__Enterobacteriaceae	g__unclassified_f__Enterobacteriaceae	s__unclassified_f__Enterobacteriaceae	ASV1552	1430	0.00161788	287	28	0	1115	0	0	0	0	0	0	0	0	0	0	0	0
d__Bacteria	k__norank_d__Bacteria	p__Bacteroidota	c__Bacteroidia	o__Flavobacteriales	f__Weeksellaceae	g__Chryseobacterium	s__unclassified_g__Chryseobacterium	ASV1406	1284	0.0014527	1270	10	0	0	0	4	0	0	0	0	0	0	0	0	0	0
d__Bacteria	k__norank_d__Bacteria	p__Proteobacteria	c__Gammaproteobacteria	o__Enterobacterales	f__Enterobacteriaceae	g__unclassified_f__Enterobacteriaceae	s__unclassified_f__Enterobacteriaceae	ASV93	1391	0.00157376	260	65	184	500	82	41	93	42	9	25	14	44	2	9	18	3
d__Bacteria	k__norank_d__Bacteria	p__Proteobacteria	c__Alphaproteobacteria	o__Rhizobiales	f__Beijerinckiaceae	g__Methylobacterium-Methylorubrum	s__unclassified_g__Methylobacterium-Methylorubrum	ASV343	1342	0.00151832	49	246	390	213	48	0	33	290	26	0	6	18	0	0	19	4
d__Bacteria	k__norank_d__Bacteria	p__Firmicutes	c__Bacilli	o__Lactobacillales	f__Carnobacteriaceae	g__norank_f__Carnobacteriaceae	s__uncultured_bacterium_g__norank_f__Carnobacteriaceae	ASV2012	1259	0.00142441	1259	0	0	0	0	0	0	0	0	0	0	0	0	0	0	0
d__Bacteria	k__norank_d__Bacteria	p__Firmicutes	c__Bacilli	o__Exiguobacterales	f__Exiguobacteraceae	g__Exiguobacterium	s__unclassified_g__Exiguobacterium	ASV1551	1369	0.00154887	0	29	65	1218	0	0	54	0	0	0	0	0	0	0	3	0
d__Bacteria	k__norank_d__Bacteria	p__Proteobacteria	c__Alphaproteobacteria	o__Rhizobiales	f__Rhizobiaceae	g__Candidatus_Liberibacter	s__unclassified_g__Candidatus_Liberibacter	ASV6	1253	0.00141763	0	0	0	0	125	82	53	215	143	45	72	100	97	115	117	89
d__Bacteria	k__norank_d__Bacteria	p__Actinobacteriota	c__Actinobacteria	o__Frankiales	f__Acidothermaceae	g__Acidothermus	s__unclassified_g__Acidothermus	ASV3409	1289	0.00145836	0	1262	0	0	0	0	0	23	4	0	0	0	0	0	0	0
d__Bacteria	k__norank_d__Bacteria	p__Actinobacteriota	c__Acidimicrobiia	o__Microtrichales	f__Microtrichaceae	g__Candidatus_Microthrix	s__unclassified_g__Candidatus_Microthrix	ASV60	1220	0.00138029	380	14	256	133	60	57	166	88	0	4	21	11	3	11	15	1
d__Bacteria	k__norank_d__Bacteria	p__Proteobacteria	c__Gammaproteobacteria	o__Burkholderiales	f__Comamonadaceae	g__Comamonas	s__unclassified_g__Comamonas	ASV1553	1161	0.00131354	0	48	47	1064	0	0	0	0	0	0	0	0	2	0	0	0
d__Bacteria	k__norank_d__Bacteria	p__Bacteroidota	c__Bacteroidia	o__Bacteroidales	f__Paludibacteraceae	g__Paludibacter	s__Paludibacter_propionicigenes_WB4	ASV1043	1097	0.00124113	0	119	680	213	0	25	24	0	0	0	0	19	0	0	11	6
d__Bacteria	k__norank_d__Bacteria	p__Proteobacteria	c__Gammaproteobacteria	o__Pseudomonadales	f__Pseudomonadaceae	g__Pseudomonas	s__unclassified_g__Pseudomonas	ASV40	1059	0.00119814	236	87	136	449	30	0	72	0	0	0	34	0	0	15	0	0
d__Bacteria	k__norank_d__Bacteria	p__Desulfobacterota	c__unclassified_p__Desulfobacterota	o__unclassified_p__Desulfobacterota	f__unclassified_p__Desulfobacterota	g__unclassified_p__Desulfobacterota	s__unclassified_p__Desulfobacterota	ASV1560	1053	0.00119135	0	28	624	373	0	0	18	0	0	0	0	10	0	0	0	0
d__Bacteria	k__norank_d__Bacteria	p__Proteobacteria	c__Gammaproteobacteria	o__Enterobacterales	f__unclassified_o__Enterobacterales	g__unclassified_o__Enterobacterales	s__unclassified_o__Enterobacterales	ASV1554	1028	0.00116306	0	0	0	1028	0	0	0	0	0	0	0	0	0	0	0	0
d__Bacteria	k__norank_d__Bacteria	p__Proteobacteria	c__Gammaproteobacteria	o__Burkholderiales	f__Rhodocyclaceae	g__unclassified_f__Rhodocyclaceae	s__unclassified_f__Rhodocyclaceae	ASV1562	957	0.00108274	158	0	489	302	0	0	0	0	0	0	0	0	0	0	8	0
d__Bacteria	k__norank_d__Bacteria	p__Bacteroidota	c__Bacteroidia	o__Bacteroidales	f__Paludibacteraceae	g__Paludibacter	s__unclassified_g__Paludibacter	ASV1310	935	0.00105785	196	0	430	281	0	5	23	0	0	0	0	0	0	0	0	0
d__Bacteria	k__norank_d__Bacteria	p__Proteobacteria	c__Gammaproteobacteria	o__Burkholderiales	f__Rhodocyclaceae	g__unclassified_f__Rhodocyclaceae	s__unclassified_f__Rhodocyclaceae	ASV1578	941	0.00106463	0	0	758	170	0	0	0	0	0	0	0	0	0	0	13	0
d__Bacteria	k__norank_d__Bacteria	p__Firmicutes	c__Bacilli	o__Bacillales	f__Bacillaceae	g__Geobacillus	s__unclassified_g__Geobacillus	ASV13	888	0.00100467	157	0	128	91	29	53	118	134	0	0	20	40	0	46	72	0
d__Bacteria	k__norank_d__Bacteria	p__Bacteroidota	c__Bacteroidia	o__Bacteroidales	f__Prevotellaceae	g__Prevotella	s__unclassified_g__Prevotella	ASV320	909	0.00102843	241	0	0	0	279	189	200	0	0	0	0	0	0	0	0	0
d__Bacteria	k__norank_d__Bacteria	p__Firmicutes	c__Bacilli	o__Staphylococcales	f__Staphylococcaceae	g__Staphylococcus	s__unclassified_g__Staphylococcus	ASV1203	882	0.000997882	363	0	0	505	0	9	0	0	0	0	0	0	5	0	0	0
d__Bacteria	k__norank_d__Bacteria	p__Bacteroidota	c__Bacteroidia	o__Bacteroidales	f__Prevotellaceae	g__Prevotella	s__unclassified_g__Prevotella	ASV319	870	0.000984305	0	0	0	0	280	214	188	112	33	0	29	14	0	0	0	0
d__Bacteria	k__norank_d__Bacteria	p__Proteobacteria	c__Alphaproteobacteria	o__Rickettsiales	f__Mitochondria	g__norank_f__Mitochondria	s__unclassified_g__norank_f__Mitochondria	ASV8	878	0.000993357	0	0	0	0	88	57	53	141	86	29	51	83	64	80	76	70
d__Bacteria	k__norank_d__Bacteria	p__Proteobacteria	c__Gammaproteobacteria	o__Burkholderiales	f__Burkholderiaceae	g__Burkholderia-Caballeronia-Paraburkholderia	s__unclassified_g__Burkholderia-Caballeronia-Paraburkholderia	ASV1559	852	0.00096394	175	65	223	373	0	0	0	0	0	0	0	0	0	0	0	16
d__Bacteria	k__norank_d__Bacteria	p__Proteobacteria	c__Gammaproteobacteria	o__Pseudomonadales	f__Pseudomonadaceae	g__Pseudomonas	s__unclassified_g__Pseudomonas	ASV31	846	0.000957152	166	143	150	184	18	41	55	29	6	0	5	9	0	20	15	5
d__Bacteria	k__norank_d__Bacteria	p__Proteobacteria	c__Alphaproteobacteria	o__Rhizobiales	f__Rhizobiaceae	g__Candidatus_Liberibacter	s__unclassified_g__Candidatus_Liberibacter	ASV4	802	0.000907371	0	0	0	0	0	0	0	390	0	0	0	197	0	215	0	0
d__Bacteria	k__norank_d__Bacteria	p__Proteobacteria	c__Alphaproteobacteria	o__Rhizobiales	f__Rhizobiaceae	g__Candidatus_Liberibacter	s__unclassified_g__Candidatus_Liberibacter	ASV321	848	0.000959415	0	0	0	0	282	0	138	0	303	125	0	0	0	0	0	0
d__Bacteria	k__norank_d__Bacteria	p__Firmicutes	c__Bacilli	o__Staphylococcales	f__Staphylococcaceae	g__Staphylococcus	s__unclassified_g__Staphylococcus	ASV2013	765	0.00086551	765	0	0	0	0	0	0	0	0	0	0	0	0	0	0	0
d__Bacteria	k__norank_d__Bacteria	p__Bacteroidota	c__Bacteroidia	o__Bacteroidales	f__Bacteroidaceae	g__Bacteroides	s__unclassified_g__Bacteroides	ASV65	777	0.000879087	0	0	0	0	300	118	156	130	31	4	14	4	7	10	3	0
d__Bacteria	k__norank_d__Bacteria	p__Firmicutes	c__Bacilli	o__Bacillales	f__Bacillaceae	g__Bacillus	s__unclassified_g__Bacillus	ASV7	736	0.0008327	0	100	241	114	4	9	29	0	0	2	0	0	0	97	134	6
d__Bacteria	k__norank_d__Bacteria	p__Actinobacteriota	c__Actinobacteria	o__Corynebacteriales	f__Mycobacteriaceae	g__Mycobacterium	s__unclassified_g__Mycobacterium	ASV2224	752	0.000850802	5	451	296	0	0	0	0	0	0	0	0	0	0	0	0	0
d__Bacteria	k__norank_d__Bacteria	p__Actinobacteriota	c__Actinobacteria	o__Pseudonocardiales	f__Pseudonocardiaceae	g__Crossiella	s__uncultured_bacterium_g__Crossiella	ASV3410	764	0.000864379	0	764	0	0	0	0	0	0	0	0	0	0	0	0	0	0
d__Bacteria	k__norank_d__Bacteria	p__Proteobacteria	c__Gammaproteobacteria	o__Xanthomonadales	f__Xanthomonadaceae	g__Stenotrophomonas	s__unclassified_g__Stenotrophomonas	ASV1600	721	0.000815729	384	122	95	120	0	0	0	0	0	0	0	0	0	0	0	0
d__Bacteria	k__norank_d__Bacteria	p__Proteobacteria	c__Gammaproteobacteria	o__Burkholderiales	f__Rhodocyclaceae	g__Zoogloea	s__unclassified_g__Zoogloea	ASV1087	730	0.000825911	291	0	238	143	0	14	33	0	0	0	3	0	0	0	8	0
d__Bacteria	k__norank_d__Bacteria	p__Bacteroidota	c__Bacteroidia	o__Bacteroidales	f__Prolixibacteraceae	g__WCHB1-32	s__unclassified_g__WCHB1-32	ASV408	706	0.000798758	287	0	342	36	18	0	23	0	0	0	0	0	0	0	0	0
d__Bacteria	k__norank_d__Bacteria	p__Bacteroidota	c__Bacteroidia	o__Bacteroidales	f__Bacteroidaceae	g__Bacteroides	s__Bacteroides_graminisolvens	ASV1659	699	0.000790838	0	29	563	77	0	0	0	0	0	2	4	15	0	0	9	0
d__Bacteria	k__norank_d__Bacteria	p__Bacteroidota	c__Bacteroidia	o__Sphingobacteriales	f__Sphingobacteriaceae	g__Sphingobacterium	s__unclassified_g__Sphingobacterium	ASV1556	714	0.000807809	0	0	13	692	0	0	0	9	0	0	0	0	0	0	0	0
d__Bacteria	k__norank_d__Bacteria	p__Proteobacteria	c__Alphaproteobacteria	o__Rhizobiales	f__Xanthobacteraceae	g__Bradyrhizobium	s__unclassified_g__Bradyrhizobium	ASV912	693	0.00078405	135	422	49	57	3	4	9	8	0	0	0	0	0	0	0	6
d__Bacteria	k__norank_d__Bacteria	p__Desulfobacterota	c__Desulfobulbia	o__Desulfobulbales	f__Desulfobulbaceae	g__Desulfobulbus	s__unclassified_g__Desulfobulbus	ASV1561	700	0.00079197	55	0	268	355	0	0	12	4	0	0	3	0	0	0	3	0
d__Bacteria	k__norank_d__Bacteria	p__Bacteroidota	c__Bacteroidia	o__Flavobacteriales	f__Flavobacteriaceae	g__unclassified_f__Flavobacteriaceae	s__unclassified_f__Flavobacteriaceae	ASV4713	651	0.000736532	0	0	0	0	0	0	0	651	0	0	0	0	0	0	0	0
d__Bacteria	k__norank_d__Bacteria	p__Firmicutes	c__Bacilli	o__Exiguobacterales	f__Exiguobacteraceae	g__Exiguobacterium	s__unclassified_g__Exiguobacterium	ASV124	670	0.000758028	0	0	0	665	0	0	0	0	0	0	0	0	0	5	0	0
d__Bacteria	k__norank_d__Bacteria	p__Proteobacteria	c__Alphaproteobacteria	o__Sphingomonadales	f__Sphingomonadaceae	g__Sphingomonas	s__unclassified_g__Sphingomonas	ASV558	610	0.000690145	257	38	83	166	6	8	21	14	0	0	0	5	1	0	11	0
d__Bacteria	k__norank_d__Bacteria	p__Firmicutes	c__Bacilli	o__Lactobacillales	f__Enterococcaceae	g__Enterococcus	s__unclassified_g__Enterococcus	ASV178	627	0.000709379	158	128	158	117	31	2	13	0	0	0	5	0	0	5	2	8
d__Bacteria	k__norank_d__Bacteria	p__Bacteroidota	c__Bacteroidia	o__Bacteroidales	f__Bacteroidaceae	g__Bacteroides	s__unclassified_g__Bacteroides	ASV12	628	0.00071051	0	0	0	0	119	53	299	70	11	11	0	0	5	45	15	0
d__Bacteria	k__norank_d__Bacteria	p__Proteobacteria	c__Gammaproteobacteria	o__Enterobacterales	f__Enterobacteriaceae	g__unclassified_f__Enterobacteriaceae	s__unclassified_f__Enterobacteriaceae	ASV1557	634	0.000717298	0	0	0	634	0	0	0	0	0	0	0	0	0	0	0	0
d__Bacteria	k__norank_d__Bacteria	p__Bacteroidota	c__Bacteroidia	o__Bacteroidales	f__Paludibacteraceae	g__Paludibacter	s__Paludibacter_jiangxiensis	ASV521	607	0.000686751	363	0	149	43	7	16	0	7	0	0	0	0	0	0	22	0
d__Bacteria	k__norank_d__Bacteria	p__Bacteroidota	c__Bacteroidia	o__Bacteroidales	f__Rikenellaceae	g__Alistipes	s__unclassified_g__Alistipes	ASV327	584	0.000660729	0	0	128	0	109	94	165	53	10	4	14	7	0	0	0	0
d__Bacteria	k__norank_d__Bacteria	p__Firmicutes	c__Clostridia	o__Oscillospirales	f__Ruminococcaceae	g__Faecalibacterium	s__unclassified_g__Faecalibacterium	ASV11	598	0.000676569	0	0	0	0	126	70	216	56	11	12	20	19	0	45	23	0
d__Bacteria	k__norank_d__Bacteria	p__Proteobacteria	c__Gammaproteobacteria	o__Burkholderiales	f__Burkholderiaceae	g__Burkholderia-Caballeronia-Paraburkholderia	s__unclassified_g__Burkholderia-Caballeronia-Paraburkholderia	ASV1605	543	0.000614342	309	23	101	110	0	0	0	0	0	0	0	0	0	0	0	0
d__Bacteria	k__norank_d__Bacteria	p__Bacteroidota	c__Bacteroidia	o__Bacteroidales	f__Prevotellaceae	g__unclassified_f__Prevotellaceae	s__unclassified_f__Prevotellaceae	ASV48	529	0.000598503	223	0	136	126	2	24	0	0	0	0	0	7	0	11	0	0
d__Bacteria	k__norank_d__Bacteria	p__Bacteroidota	c__Bacteroidia	o__Bacteroidales	f__Prevotellaceae	g__Prevotella	s__unclassified_g__Prevotella	ASV322	543	0.000614342	0	0	0	0	268	124	0	151	0	0	0	0	0	0	0	0
d__Bacteria	k__norank_d__Bacteria	p__Actinobacteriota	c__Actinobacteria	o__Bifidobacteriales	f__Bifidobacteriaceae	g__Bifidobacterium	s__unclassified_g__Bifidobacterium	ASV105	548	0.000619999	0	34	0	0	134	91	205	42	1	5	0	30	0	6	0	0
d__Bacteria	k__norank_d__Bacteria	p__Firmicutes	c__Bacilli	o__Lactobacillales	f__Carnobacteriaceae	g__Carnobacterium	s__unclassified_g__Carnobacterium	ASV1106	551	0.000623393	0	0	50	489	0	12	0	0	0	0	0	0	0	0	0	0
d__Bacteria	k__norank_d__Bacteria	p__Actinobacteriota	c__Actinobacteria	o__Bifidobacteriales	f__Bifidobacteriaceae	g__Bifidobacterium	s__unclassified_g__Bifidobacterium	ASV328	553	0.000625656	0	25	0	231	111	46	65	35	11	4	8	17	0	0	0	0
d__Bacteria	k__norank_d__Bacteria	p__Proteobacteria	c__Alphaproteobacteria	o__Caulobacterales	f__Caulobacteraceae	g__Brevundimonas	s__unclassified_g__Brevundimonas	ASV489	523	0.000591715	208	0	112	162	10	0	5	23	0	0	0	0	3	0	0	0
d__Bacteria	k__norank_d__Bacteria	p__Actinobacteriota	c__Actinobacteria	o__Propionibacteriales	f__Propionibacteriaceae	g__Cutibacterium	s__unclassified_g__Cutibacterium	ASV384	507	0.000573612	70	74	303	26	23	0	0	0	0	6	0	0	5	0	0	0
d__Bacteria	k__norank_d__Bacteria	p__Proteobacteria	c__Gammaproteobacteria	o__Burkholderiales	f__Comamonadaceae	g__unclassified_f__Comamonadaceae	s__unclassified_f__Comamonadaceae	ASV1597	504	0.000570218	388	0	0	116	0	0	0	0	0	0	0	0	0	0	0	0
d__Bacteria	k__norank_d__Bacteria	p__Actinobacteriota	c__Actinobacteria	o__Propionibacteriales	f__Propionibacteriaceae	g__Cutibacterium	s__unclassified_g__Cutibacterium	ASV71	521	0.000589452	39	0	73	224	0	40	24	24	10	0	4	36	0	9	36	2
d__Bacteria	k__norank_d__Bacteria	p__Actinobacteriota	c__Thermoleophilia	o__Solirubrobacterales	f__Solirubrobacteraceae	g__Conexibacter	s__unclassified_g__Conexibacter	ASV415	532	0.000601897	0	515	0	0	17	0	0	0	0	0	0	0	0	0	0	0
d__Bacteria	k__norank_d__Bacteria	p__Actinobacteriota	c__Actinobacteria	o__Micrococcales	f__unclassified_o__Micrococcales	g__unclassified_o__Micrococcales	s__unclassified_o__Micrococcales	ASV211	489	0.000553248	0	0	0	0	0	6	0	477	0	0	0	4	0	2	0	0
d__Bacteria	k__norank_d__Bacteria	p__Proteobacteria	c__Gammaproteobacteria	o__Enterobacterales	f__Enterobacteriaceae	g__Enterobacter	s__unclassified_g__Enterobacter	ASV2017	464	0.000524963	390	27	35	0	0	0	0	0	0	0	0	0	6	0	6	0
d__Bacteria	k__norank_d__Bacteria	p__Bacteroidota	c__Bacteroidia	o__Flavobacteriales	f__Weeksellaceae	g__Chryseobacterium	s__unclassified_g__Chryseobacterium	ASV1611	486	0.000549853	0	21	359	106	0	0	0	0	0	0	0	0	0	0	0	0
d__Bacteria	k__norank_d__Bacteria	p__Proteobacteria	c__Gammaproteobacteria	o__Pseudomonadales	f__Pseudomonadaceae	g__Pseudomonas	s__unclassified_g__Pseudomonas	ASV1042	455	0.00051478	330	0	0	0	0	24	44	21	0	0	0	17	0	0	11	8
d__Bacteria	k__norank_d__Bacteria	p__Actinobacteriota	c__Actinobacteria	o__Bifidobacteriales	f__Bifidobacteriaceae	g__Bifidobacterium	s__unclassified_g__Bifidobacterium	ASV38	491	0.00055551	69	0	0	40	119	70	28	72	0	6	5	27	9	17	29	0
d__Bacteria	k__norank_d__Bacteria	p__Actinobacteriota	c__Actinobacteria	o__Propionibacteriales	f__Nocardioidaceae	g__Nocardioides	s__unclassified_g__Nocardioides	ASV513	474	0.000536277	200	0	0	199	8	24	30	13	0	0	0	0	0	0	0	0
d__Bacteria	k__norank_d__Bacteria	p__Bacteroidota	c__Bacteroidia	o__Bacteroidales	f__unclassified_o__Bacteroidales	g__unclassified_o__Bacteroidales	s__unclassified_o__Bacteroidales	ASV852	482	0.000545328	0	63	271	138	3	0	7	0	0	0	0	0	0	0	0	0
d__Bacteria	k__norank_d__Bacteria	p__Proteobacteria	c__Gammaproteobacteria	o__Burkholderiales	f__Comamonadaceae	g__Comamonas	s__Comamonas_koreensis	ASV1925	443	0.000501204	356	37	0	22	0	0	20	0	0	0	5	3	0	0	0	0
d__Bacteria	k__norank_d__Bacteria	p__Firmicutes	c__Bacilli	o__Lactobacillales	f__Aerococcaceae	g__Dolosicoccus	s__uncultured_bacterium_g__Dolosicoccus	ASV2014	436	0.000493284	436	0	0	0	0	0	0	0	0	0	0	0	0	0	0	0
d__Bacteria	k__norank_d__Bacteria	p__Bacteroidota	c__Bacteroidia	o__Flavobacteriales	f__Weeksellaceae	g__Chryseobacterium	s__unclassified_g__Chryseobacterium	ASV520	446	0.000504598	310	12	57	27	7	0	0	0	0	0	3	0	5	0	25	0
d__Bacteria	k__norank_d__Bacteria	p__Actinobacteriota	c__Actinobacteria	o__Frankiales	f__Acidothermaceae	g__Acidothermus	s__unclassified_g__Acidothermus	ASV2235	466	0.000527226	3	458	0	0	0	0	0	0	0	0	0	0	5	0	0	0
d__Bacteria	k__norank_d__Bacteria	p__Bacteroidota	c__Bacteroidia	o__Bacteroidales	f__Bacteroidaceae	g__Bacteroides	s__unclassified_g__Bacteroides	ASV2401	450	0.000509123	0	2	429	0	0	0	0	19	0	0	0	0	0	0	0	0
d__Bacteria	k__norank_d__Bacteria	p__Actinobacteriota	c__Actinobacteria	o__Micrococcales	f__Bogoriellaceae	g__Georgenia	s__unclassified_g__Georgenia	ASV1162	432	0.000488759	0	0	0	0	0	8	0	424	0	0	0	0	0	0	0	0
d__Bacteria	k__norank_d__Bacteria	p__Proteobacteria	c__Gammaproteobacteria	o__Burkholderiales	f__Burkholderiaceae	g__Burkholderia-Caballeronia-Paraburkholderia	s__unclassified_g__Burkholderia-Caballeronia-Paraburkholderia	ASV1566	467	0.000528357	0	155	87	225	0	0	0	0	0	0	0	0	0	0	0	0
d__Bacteria	k__norank_d__Bacteria	p__Myxococcota	c__Myxococcia	o__Myxococcales	f__Myxococcaceae	g__P3OB-42	s__uncultured_bacterium_g__P3OB-42	ASV4714	418	0.000472919	0	0	0	0	0	0	0	418	0	0	0	0	0	0	0	0
d__Bacteria	k__norank_d__Bacteria	p__Acidobacteriota	c__Acidobacteriae	o__Subgroup_2	f__norank_o__Subgroup_2	g__norank_f__norank_o__Subgroup_2	s__unclassified_g__norank_f__norank_o__Subgroup_2	ASV3411	440	0.00049781	0	440	0	0	0	0	0	0	0	0	0	0	0	0	0	0
d__Bacteria	k__norank_d__Bacteria	p__Desulfobacterota	c__Desulfobulbia	o__Desulfobulbales	f__Desulfobulbaceae	g__Desulfobulbus	s__unclassified_g__Desulfobulbus	ASV1571	433	0.00048989	91	0	127	198	0	0	14	0	0	0	0	3	0	0	0	0
d__Bacteria	k__norank_d__Bacteria	p__Actinobacteriota	c__Actinobacteria	o__Frankiales	f__Acidothermaceae	g__Acidothermus	s__bacterium_Ellin334	ASV2234	450	0.000509123	3	442	0	0	0	0	0	0	0	0	0	5	0	0	0	0
d__Bacteria	k__norank_d__Bacteria	p__Actinobacteriota	c__Actinobacteria	o__Corynebacteriales	f__Corynebacteriaceae	g__Corynebacterium	s__unclassified_g__Corynebacterium	ASV2015	408	0.000461605	408	0	0	0	0	0	0	0	0	0	0	0	0	0	0	0
d__Bacteria	k__norank_d__Bacteria	p__Proteobacteria	c__Gammaproteobacteria	o__Burkholderiales	f__Rhodocyclaceae	g__unclassified_f__Rhodocyclaceae	s__unclassified_f__Rhodocyclaceae	ASV1608	425	0.000480839	151	24	131	104	0	0	0	0	0	0	0	15	0	0	0	0
d__Bacteria	k__norank_d__Bacteria	p__Actinobacteriota	c__Actinobacteria	o__Corynebacteriales	f__Corynebacteriaceae	g__Corynebacterium	s__Corynebacterium_suicordis	ASV2016	395	0.000446897	392	0	0	0	0	0	0	0	0	0	0	0	0	0	3	0
d__Bacteria	k__norank_d__Bacteria	p__Bacteroidota	c__Bacteroidia	o__Sphingobacteriales	f__Lentimicrobiaceae	g__Lentimicrobium	s__denitrifying_bacterium_enrichment_culture_clone_NOB_2_E8	ASV1640	393	0.000444635	208	41	48	84	0	0	0	0	0	0	0	0	0	0	12	0
d__Bacteria	k__norank_d__Bacteria	p__Actinobacteriota	c__Actinobacteria	o__Corynebacteriales	f__Mycobacteriaceae	g__Mycobacterium	s__unclassified_g__Mycobacterium	ASV3412	439	0.000496678	0	439	0	0	0	0	0	0	0	0	0	0	0	0	0	0
d__Bacteria	k__norank_d__Bacteria	p__Bacteroidota	c__Bacteroidia	o__Bacteroidales	f__Prevotellaceae	g__unclassified_f__Prevotellaceae	s__unclassified_f__Prevotellaceae	ASV1088	404	0.00045708	136	0	130	97	0	15	0	21	5	0	0	0	0	0	0	0
d__Bacteria	k__norank_d__Bacteria	p__Proteobacteria	c__Gammaproteobacteria	o__Xanthomonadales	f__Xanthomonadaceae	g__Stenotrophomonas	s__unclassified_g__Stenotrophomonas	ASV39	419	0.000474051	0	0	0	123	27	37	82	41	7	5	16	0	5	13	63	0
d__Bacteria	k__norank_d__Bacteria	p__Proteobacteria	c__Alphaproteobacteria	o__Rhizobiales	f__Rhizobiaceae	g__Allorhizobium-Neorhizobium-Pararhizobium-Rhizobium	s__unclassified_g__Allorhizobium-Neorhizobium-Pararhizobium-Rhizobium	ASV263	403	0.000455948	135	0	95	35	11	11	22	26	0	8	6	13	8	3	30	0
d__Bacteria	k__norank_d__Bacteria	p__Bacteroidota	c__Bacteroidia	o__Bacteroidales	f__Bacteroidaceae	g__Bacteroides	s__unclassified_g__Bacteroides	ASV337	411	0.000464999	0	0	0	35	68	56	183	59	0	0	0	0	10	0	0	0
d__Bacteria	k__norank_d__Bacteria	p__Bacteroidota	c__Bacteroidia	o__Sphingobacteriales	f__Lentimicrobiaceae	g__Lentimicrobium	s__denitrifying_bacterium_enrichment_culture_clone_NOB_2_E8	ASV1051	402	0.000454817	0	35	115	216	0	18	0	14	4	0	0	0	0	0	0	0
d__Bacteria	k__norank_d__Bacteria	p__Firmicutes	c__Bacilli	o__Lactobacillales	f__Aerococcaceae	g__Dolosicoccus	s__uncultured_bacterium_g__Dolosicoccus	ASV2018	383	0.000433321	383	0	0	0	0	0	0	0	0	0	0	0	0	0	0	0
d__Bacteria	k__norank_d__Bacteria	p__Firmicutes	c__Bacilli	o__Lactobacillales	f__Aerococcaceae	g__Dolosicoccus	s__uncultured_bacterium_g__Dolosicoccus	ASV2019	369	0.000417481	369	0	0	0	0	0	0	0	0	0	0	0	0	0	0	0
d__Bacteria	k__norank_d__Bacteria	p__Actinobacteriota	c__Actinobacteria	o__Micrococcales	f__Microbacteriaceae	g__Leifsonia	s__unclassified_g__Leifsonia	ASV185	405	0.000458211	18	29	234	62	18	0	7	0	3	7	0	13	10	3	0	1
d__Bacteria	k__norank_d__Bacteria	p__Proteobacteria	c__Alphaproteobacteria	o__Rhizobiales	f__Beijerinckiaceae	g__Methylobacterium-Methylorubrum	s__unclassified_g__Methylobacterium-Methylorubrum	ASV350	390	0.00044124	60	37	44	144	46	2	0	57	0	0	0	0	0	0	0	0
d__Bacteria	k__norank_d__Bacteria	p__Proteobacteria	c__Gammaproteobacteria	o__Burkholderiales	f__Rhodocyclaceae	g__Zoogloea	s__unclassified_g__Zoogloea	ASV725	393	0.000444635	0	28	242	107	5	0	7	4	0	0	0	0	0	0	0	0
d__Bacteria	k__norank_d__Bacteria	p__Actinobacteriota	c__Actinobacteria	o__Micrococcales	f__Micrococcaceae	g__Rothia	s__unclassified_g__Rothia	ASV2020	367	0.000415218	365	0	0	0	0	0	0	0	0	0	0	0	2	0	0	0
d__Bacteria	k__norank_d__Bacteria	p__Proteobacteria	c__Gammaproteobacteria	o__Burkholderiales	f__Burkholderiaceae	g__Burkholderia-Caballeronia-Paraburkholderia	s__unclassified_g__Burkholderia-Caballeronia-Paraburkholderia	ASV3413	399	0.000451423	0	399	0	0	0	0	0	0	0	0	0	0	0	0	0	0
d__Bacteria	k__norank_d__Bacteria	p__Acidobacteriota	c__Acidobacteriae	o__Subgroup_2	f__norank_o__Subgroup_2	g__norank_f__norank_o__Subgroup_2	s__uncultured_Acidobacteriales_bacterium_g__norank_f__norank_o__Subgroup_2	ASV216	344	0.000389197	191	59	31	0	8	0	18	31	0	0	0	0	4	2	0	0
d__Bacteria	k__norank_d__Bacteria	p__Proteobacteria	c__Gammaproteobacteria	o__Burkholderiales	f__Comamonadaceae	g__unclassified_f__Comamonadaceae	s__unclassified_f__Comamonadaceae	ASV1589	356	0.000402773	159	0	64	133	0	0	0	0	0	0	0	0	0	0	0	0
d__Bacteria	k__norank_d__Bacteria	p__Bacteroidota	c__Bacteroidia	o__Bacteroidales	f__Prevotellaceae	g__Prevotella	s__unclassified_g__Prevotella	ASV1592	382	0.000432189	0	34	0	124	0	0	178	0	0	46	0	0	0	0	0	0
d__Bacteria	k__norank_d__Bacteria	p__Firmicutes	c__Bacilli	o__Lactobacillales	f__Carnobacteriaceae	g__Trichococcus	s__unclassified_g__Trichococcus	ASV410	373	0.000422007	0	33	141	71	19	7	52	25	6	3	0	3	0	0	9	4
d__Bacteria	k__norank_d__Bacteria	p__Proteobacteria	c__Gammaproteobacteria	o__Competibacterales	f__Competibacteraceae	g__Candidatus_Contendobacter	s__unclassified_g__Candidatus_Contendobacter	ASV168	365	0.000412956	0	0	0	0	5	0	188	109	0	0	0	56	2	5	0	0
d__Bacteria	k__norank_d__Bacteria	p__Actinobacteriota	c__Actinobacteria	o__Micrococcales	f__Micrococcaceae	g__Kocuria	s__unclassified_g__Kocuria	ASV2021	340	0.000384671	335	0	0	0	0	0	0	0	0	0	5	0	0	0	0	0
d__Bacteria	k__norank_d__Bacteria	p__Bacteroidota	c__Bacteroidia	o__Bacteroidales	f__Paludibacteraceae	g__Paludibacter	s__unclassified_g__Paludibacter	ASV2248	354	0.00040051	0	0	267	0	0	0	58	14	0	4	11	0	0	0	0	0
d__Bacteria	k__norank_d__Bacteria	p__Acidobacteriota	c__Acidobacteriae	o__Subgroup_2	f__norank_o__Subgroup_2	g__norank_f__norank_o__Subgroup_2	s__uncultured_Holophaga_sp._g__norank_f__norank_o__Subgroup_2	ASV3110	368	0.00041635	0	359	0	0	0	0	9	0	0	0	0	0	0	0	0	0
d__Bacteria	k__norank_d__Bacteria	p__Firmicutes	c__Bacilli	o__Bacillales	f__Planococcaceae	g__unclassified_f__Planococcaceae	s__unclassified_f__Planococcaceae	ASV1165	350	0.000395985	228	26	0	61	0	8	15	0	0	0	0	12	0	0	0	0
d__Bacteria	k__norank_d__Bacteria	p__Proteobacteria	c__Alphaproteobacteria	o__Rhizobiales	f__Beijerinckiaceae	g__Roseiarcus	s__unclassified_g__Roseiarcus	ASV3414	358	0.000405036	0	358	0	0	0	0	0	0	0	0	0	0	0	0	0	0
d__Bacteria	k__norank_d__Bacteria	p__Firmicutes	c__Clostridia	o__Peptostreptococcales-Tissierellales	f__Peptostreptococcaceae	g__Romboutsia	s__unclassified_g__Romboutsia	ASV15	358	0.000405036	0	0	0	0	39	41	55	105	10	29	0	0	0	41	0	38
d__Bacteria	k__norank_d__Bacteria	p__Bacteroidota	c__Bacteroidia	o__Bacteroidales	f__Prevotellaceae	g__Prevotella	s__unclassified_g__Prevotella	ASV323	334	0.000377883	0	0	0	0	186	53	0	71	0	0	0	0	24	0	0	0
d__Bacteria	k__norank_d__Bacteria	p__Firmicutes	c__Clostridia	o__Peptostreptococcales-Tissierellales	f__Peptostreptococcaceae	g__Terrisporobacter	s__unclassified_g__Terrisporobacter	ASV30	345	0.000390328	0	95	0	0	0	0	0	151	5	0	0	0	0	19	0	75
d__Bacteria	k__norank_d__Bacteria	p__Desulfobacterota	c__Desulfuromonadia	o__Geobacterales	f__Geobacteraceae	g__unclassified_f__Geobacteraceae	s__unclassified_f__Geobacteraceae	ASV1582	334	0.000377883	0	31	153	144	0	0	6	0	0	0	0	0	0	0	0	0
d__Bacteria	k__norank_d__Bacteria	p__Firmicutes	c__Clostridia	o__Clostridia_UCG-014	f__norank_o__Clostridia_UCG-014	g__norank_f__norank_o__Clostridia_UCG-014	s__gut_metagenome_g__norank_f__norank_o__Clostridia_UCG-014	ASV334	341	0.000385802	0	0	0	0	73	76	131	34	5	2	13	7	0	0	0	0
d__Bacteria	k__norank_d__Bacteria	p__Bacteroidota	c__Bacteroidia	o__Flavobacteriales	f__Weeksellaceae	g__Chryseobacterium	s__unclassified_g__Chryseobacterium	ASV57	336	0.000380146	153	0	15	115	16	0	11	5	0	0	2	2	0	11	6	0
d__Bacteria	k__norank_d__Bacteria	p__Bacteroidota	c__Bacteroidia	o__Bacteroidales	f__Bacteroidaceae	g__Bacteroides	s__Bacteroides_massiliensis	ASV340	338	0.000382408	0	0	0	0	56	95	106	60	21	0	0	0	0	0	0	0
d__Bacteria	k__norank_d__Bacteria	p__Firmicutes	c__Clostridia	o__Oscillospirales	f__Ruminococcaceae	g__Faecalibacterium	s__unclassified_g__Faecalibacterium	ASV22	332	0.00037562	0	0	0	0	106	50	91	26	0	13	7	0	4	23	12	0
d__Bacteria	k__norank_d__Bacteria	p__Actinobacteriota	c__Actinobacteria	o__Micrococcales	f__Micrococcaceae	g__Kocuria	s__unclassified_g__Kocuria	ASV2022	309	0.000349598	309	0	0	0	0	0	0	0	0	0	0	0	0	0	0	0
d__Bacteria	k__norank_d__Bacteria	p__Actinobacteriota	c__Actinobacteria	o__Frankiales	f__Acidothermaceae	g__Acidothermus	s__unclassified_g__Acidothermus	ASV488	340	0.000384671	0	323	0	0	8	0	0	0	0	0	9	0	0	0	0	0
d__Bacteria	k__norank_d__Bacteria	p__Proteobacteria	c__Gammaproteobacteria	o__Burkholderiales	f__Rhodocyclaceae	g__Thauera	s__unclassified_g__Thauera	ASV1837	308	0.000348467	138	0	114	33	0	0	0	23	0	0	0	0	0	0	0	0
d__Bacteria	k__norank_d__Bacteria	p__Spirochaetota	c__Spirochaetia	o__Spirochaetales	f__Spirochaetaceae	g__Treponema	s__Treponema_zuelzerae	ASV1781	318	0.000359781	104	26	144	44	0	0	0	0	0	0	0	0	0	0	0	0
d__Bacteria	k__norank_d__Bacteria	p__Actinobacteriota	c__Actinobacteria	o__Micrococcales	f__Micrococcaceae	g__Glutamicibacter	s__unclassified_g__Glutamicibacter	ASV1570	318	0.000359781	0	0	114	201	0	0	0	0	3	0	0	0	0	0	0	0
d__Bacteria	k__norank_d__Bacteria	p__Proteobacteria	c__Gammaproteobacteria	o__Enterobacterales	f__Erwiniaceae	g__Pantoea	s__Pantoea_eucrina	ASV1764	303	0.00034281	239	14	0	50	0	0	0	0	0	0	0	0	0	0	0	0
d__Bacteria	k__norank_d__Bacteria	p__Proteobacteria	c__Alphaproteobacteria	o__Rhizobiales	f__Rhizobiaceae	g__unclassified_f__Rhizobiaceae	s__unclassified_f__Rhizobiaceae	ASV1185	320	0.000362043	93	39	71	76	0	8	21	0	0	0	0	8	0	0	0	4
d__Bacteria	k__norank_d__Bacteria	p__Bacteroidota	c__Bacteroidia	o__Bacteroidales	f__Bacteroidaceae	g__Bacteroides	s__unclassified_g__Bacteroides	ASV325	321	0.000363175	0	0	0	0	130	112	0	44	0	0	0	27	0	0	8	0
d__Bacteria	k__norank_d__Bacteria	p__Proteobacteria	c__Gammaproteobacteria	o__Burkholderiales	f__Comamonadaceae	g__unclassified_f__Comamonadaceae	s__unclassified_f__Comamonadaceae	ASV2410	319	0.000360912	0	102	137	0	0	0	26	42	0	0	0	12	0	0	0	0
d__Bacteria	k__norank_d__Bacteria	p__Acidobacteriota	c__Holophagae	o__Holophagales	f__Holophagaceae	g__norank_f__Holophagaceae	s__unclassified_g__norank_f__Holophagaceae	ASV1327	298	0.000337153	232	4	0	55	0	3	0	4	0	0	0	0	0	0	0	0
d__Bacteria	k__norank_d__Bacteria	p__Campilobacterota	c__Campylobacteria	o__Campylobacterales	f__norank_o__Campylobacterales	g__norank_f__norank_o__Campylobacterales	s__unclassified_g__norank_f__norank_o__Campylobacterales	ASV1575	319	0.000360912	0	16	115	188	0	0	0	0	0	0	0	0	0	0	0	0
d__Bacteria	k__norank_d__Bacteria	p__Firmicutes	c__Bacilli	o__Erysipelotrichales	f__Erysipelotrichaceae	g__Turicibacter	s__unclassified_g__Turicibacter	ASV305	286	0.000323576	0	0	54	10	17	12	47	75	0	0	0	0	0	1	0	70
d__Bacteria	k__norank_d__Bacteria	p__Firmicutes	c__Clostridia	o__Lachnospirales	f__Lachnospiraceae	g__Eubacterium_ruminantium_group	s__unclassified_g__Eubacterium_ruminantium_group	ASV326	310	0.00035073	0	0	31	0	117	51	84	19	0	2	5	0	1	0	0	0
d__Bacteria	k__norank_d__Bacteria	p__Bacteroidota	c__Bacteroidia	o__Bacteroidales	f__Tannerellaceae	g__Macellibacteroides	s__unclassified_g__Macellibacteroides	ASV1568	310	0.00035073	0	0	75	221	0	0	0	0	0	0	14	0	0	0	0	0
d__Bacteria	k__norank_d__Bacteria	p__Bacteroidota	c__Bacteroidia	o__Flavobacteriales	f__Weeksellaceae	g__Chryseobacterium	s__unclassified_g__Chryseobacterium	ASV636	287	0.000324708	184	0	0	86	3	0	0	0	0	0	0	0	0	0	14	0
d__Bacteria	k__norank_d__Bacteria	p__Firmicutes	c__Bacilli	o__Lactobacillales	f__Streptococcaceae	g__Streptococcus	s__unclassified_g__Streptococcus	ASV1694	296	0.00033489	117	0	40	64	0	0	75	0	0	0	0	0	0	0	0	0
d__Bacteria	k__norank_d__Bacteria	p__Firmicutes	c__Clostridia	o__Lachnospirales	f__Lachnospiraceae	g__Fusicatenibacter	s__unclassified_g__Fusicatenibacter	ASV220	289	0.00032697	49	0	0	103	56	34	28	0	7	5	0	0	3	4	0	0
d__Bacteria	k__norank_d__Bacteria	p__Proteobacteria	c__Alphaproteobacteria	o__Rickettsiales	f__Mitochondria	g__norank_f__Mitochondria	s__unclassified_g__norank_f__Mitochondria	ASV20	283	0.000320182	0	0	0	0	28	0	29	40	24	0	24	31	34	24	26	23
d__Bacteria	k__norank_d__Bacteria	p__Bacteroidota	c__Bacteroidia	o__Bacteroidales	f__Paludibacteraceae	g__Paludibacter	s__uncultured_bacterium_g__Paludibacter	ASV472	281	0.000317919	62	0	65	122	11	8	0	0	0	0	0	0	0	0	13	0
d__Bacteria	k__norank_d__Bacteria	p__Desulfobacterota	c__Desulfovibrionia	o__Desulfovibrionales	f__Desulfovibrionaceae	g__Desulfovibrio	s__unclassified_g__Desulfovibrio	ASV1607	277	0.000313394	0	0	147	105	0	0	11	14	0	0	0	0	0	0	0	0
d__Bacteria	k__norank_d__Bacteria	p__Actinobacteriota	c__Actinobacteria	o__Corynebacteriales	f__Dietziaceae	g__Dietzia	s__unclassified_g__Dietzia	ASV275	282	0.000319051	0	0	180	0	0	14	58	11	6	0	1	0	0	2	4	6
d__Bacteria	k__norank_d__Bacteria	p__Bacteroidota	c__Bacteroidia	o__Bacteroidales	f__Dysgonomonadaceae	g__Fermentimonas	s__Fermentimonas_caenicola	ASV816	283	0.000320182	0	0	0	0	3	0	0	277	0	0	3	0	0	0	0	0
d__Bacteria	k__norank_d__Bacteria	p__Bacteroidota	c__Bacteroidia	o__Bacteroidales	f__Tannerellaceae	g__Macellibacteroides	s__unclassified_g__Macellibacteroides	ASV1569	287	0.000324708	0	65	0	210	0	0	0	12	0	0	0	0	0	0	0	0
d__Bacteria	k__norank_d__Bacteria	p__Actinobacteriota	c__Actinobacteria	o__Micrococcales	f__Microbacteriaceae	g__Microbacterium	s__unclassified_g__Microbacterium	ASV637	286	0.000323576	12	0	82	126	5	0	0	5	0	30	7	6	0	0	13	0
d__Bacteria	k__norank_d__Bacteria	p__Acidobacteriota	c__Acidobacteriae	o__Acidobacteriales	f__norank_o__Acidobacteriales	g__norank_f__norank_o__Acidobacteriales	s__unclassified_g__norank_f__norank_o__Acidobacteriales	ASV2236	276	0.000312262	2	272	0	0	0	0	0	0	0	0	0	2	0	0	0	0
d__Bacteria	k__norank_d__Bacteria	p__Firmicutes	c__Clostridia	o__Lachnospirales	f__Lachnospiraceae	g__Eubacterium_hallii_group	s__unclassified_g__Eubacterium_hallii_group	ASV332	276	0.000312262	82	0	0	0	78	53	39	0	0	11	0	4	0	0	9	0
d__Bacteria	k__norank_d__Bacteria	p__Actinobacteriota	c__Actinobacteria	o__Corynebacteriales	f__Mycobacteriaceae	g__Mycobacterium	s__unclassified_g__Mycobacterium	ASV3415	284	0.000321313	0	284	0	0	0	0	0	0	0	0	0	0	0	0	0	0
d__Bacteria	k__norank_d__Bacteria	p__Acidobacteriota	c__Acidobacteriae	o__Acidobacteriales	f__norank_o__Acidobacteriales	g__norank_f__norank_o__Acidobacteriales	s__unclassified_g__norank_f__norank_o__Acidobacteriales	ASV3416	294	0.000332627	0	294	0	0	0	0	0	0	0	0	0	0	0	0	0	0
d__Bacteria	k__norank_d__Bacteria	p__Bacteroidota	c__Bacteroidia	o__Bacteroidales	f__Bacteroidaceae	g__Bacteroides	s__Bacteroides_coprocola_DSM_17136	ASV109	293	0.000331496	0	0	0	0	99	0	167	0	2	0	13	0	5	7	0	0
d__Bacteria	k__norank_d__Bacteria	p__Actinobacteriota	c__Actinobacteria	o__Corynebacteriales	f__Mycobacteriaceae	g__Mycobacterium	s__unclassified_g__Mycobacterium	ASV3417	282	0.000319051	0	282	0	0	0	0	0	0	0	0	0	0	0	0	0	0
d__Bacteria	k__norank_d__Bacteria	p__Bacteroidota	c__Bacteroidia	o__Bacteroidales	f__unclassified_o__Bacteroidales	g__unclassified_o__Bacteroidales	s__unclassified_o__Bacteroidales	ASV1047	277	0.000313394	0	0	99	100	0	23	26	16	0	0	0	13	0	0	0	0
d__Bacteria	k__norank_d__Bacteria	p__Bacteroidota	c__Bacteroidia	o__Bacteroidales	f__Rikenellaceae	g__Alistipes	s__unclassified_g__Alistipes	ASV59	264	0.000298686	0	0	0	0	80	31	91	48	0	0	0	3	1	10	0	0
d__Bacteria	k__norank_d__Bacteria	p__Bacteroidota	c__Bacteroidia	o__Bacteroidales	f__Paludibacteraceae	g__Paludibacter	s__Paratrimastix_pyriformis	ASV2405	271	0.000306605	0	102	159	0	0	0	0	10	0	0	0	0	0	0	0	0
d__Bacteria	k__norank_d__Bacteria	p__Firmicutes	c__Clostridia	o__Clostridiales	f__Clostridiaceae	g__Clostridium_sensu_stricto_1	s__unclassified_g__Clostridium_sensu_stricto_1	ASV2023	253	0.000286241	245	0	0	0	0	0	8	0	0	0	0	0	0	0	0	0
d__Bacteria	k__norank_d__Bacteria	p__Firmicutes	c__Clostridia	o__Oscillospirales	f__Ruminococcaceae	g__Anaerofilum	s__unclassified_g__Anaerofilum	ASV1577	275	0.000311131	0	21	75	179	0	0	0	0	0	0	0	0	0	0	0	0
d__Bacteria	k__norank_d__Bacteria	p__Firmicutes	c__Clostridia	o__Lachnospirales	f__Lachnospiraceae	g__unclassified_f__Lachnospiraceae	s__unclassified_f__Lachnospiraceae	ASV171	275	0.000311131	0	4	240	26	0	0	0	0	0	0	0	0	0	5	0	0
d__Bacteria	k__norank_d__Bacteria	p__Bacteroidota	c__Bacteroidia	o__Bacteroidales	f__Paludibacteraceae	g__Paludibacter	s__unclassified_g__Paludibacter	ASV1364	265	0.000299817	0	0	236	0	0	4	25	0	0	0	0	0	0	0	0	0
d__Bacteria	k__norank_d__Bacteria	p__Bacteroidota	c__Bacteroidia	o__Sphingobacteriales	f__Sphingobacteriaceae	g__Sphingobacterium	s__unclassified_g__Sphingobacterium	ASV1563	274	0.00031	0	0	0	274	0	0	0	0	0	0	0	0	0	0	0	0
d__Bacteria	k__norank_d__Bacteria	p__Actinobacteriota	c__Actinobacteria	o__Micrococcales	f__Intrasporangiaceae	g__Ornithinimicrobium	s__unclassified_g__Ornithinimicrobium	ASV2045	248	0.000280584	135	0	113	0	0	0	0	0	0	0	0	0	0	0	0	0
d__Bacteria	k__norank_d__Bacteria	p__Proteobacteria	c__Alphaproteobacteria	o__Rhizobiales	f__Xanthobacteraceae	g__norank_f__Xanthobacteraceae	s__uncultured_forest_soil_bacterium_g__norank_f__Xanthobacteraceae	ASV2225	262	0.000296423	7	255	0	0	0	0	0	0	0	0	0	0	0	0	0	0
d__Bacteria	k__norank_d__Bacteria	p__Bacteroidota	c__Bacteroidia	o__Bacteroidales	f__Prevotellaceae	g__unclassified_f__Prevotellaceae	s__unclassified_f__Prevotellaceae	ASV1565	261	0.000295292	0	18	0	243	0	0	0	0	0	0	0	0	0	0	0	0
d__Bacteria	k__norank_d__Bacteria	p__Proteobacteria	c__Alphaproteobacteria	o__Rhizobiales	f__Xanthobacteraceae	g__norank_f__Xanthobacteraceae	s__unclassified_g__norank_f__Xanthobacteraceae	ASV3418	262	0.000296423	0	262	0	0	0	0	0	0	0	0	0	0	0	0	0	0
d__Bacteria	k__norank_d__Bacteria	p__Actinobacteriota	c__Actinobacteria	o__Corynebacteriales	f__Mycobacteriaceae	g__Mycobacterium	s__unclassified_g__Mycobacterium	ASV3419	270	0.000305474	0	270	0	0	0	0	0	0	0	0	0	0	0	0	0	0
d__Bacteria	k__norank_d__Bacteria	p__Desulfobacterota	c__Desulfuromonadia	o__Geobacterales	f__Geobacteraceae	g__Trichlorobacter	s__unclassified_g__Trichlorobacter	ASV1936	249	0.000281715	0	13	217	19	0	0	0	0	0	0	0	0	0	0	0	0
d__Bacteria	k__norank_d__Bacteria	p__Actinobacteriota	c__Actinobacteria	o__Corynebacteriales	f__Corynebacteriaceae	g__Turicella	s__uncultured_bacterium_g__Turicella	ASV191	239	0.000270401	78	0	71	0	4	0	41	15	0	0	3	14	0	3	10	0
d__Bacteria	k__norank_d__Bacteria	p__Bacteroidota	c__Bacteroidia	o__Flavobacteriales	f__Weeksellaceae	g__Chryseobacterium	s__unclassified_g__Chryseobacterium	ASV2024	235	0.000265876	235	0	0	0	0	0	0	0	0	0	0	0	0	0	0	0
d__Bacteria	k__norank_d__Bacteria	p__Bacteroidota	c__Bacteroidia	o__Bacteroidales	f__Paludibacteraceae	g__Paludibacter	s__uncultured_bacterium_g__Paludibacter	ASV1567	249	0.000281715	0	0	0	216	0	0	33	0	0	0	0	0	0	0	0	0
d__Bacteria	k__norank_d__Bacteria	p__Firmicutes	c__Clostridia	o__Oscillospirales	f__Ruminococcaceae	g__Faecalibacterium	s__unclassified_g__Faecalibacterium	ASV24	250	0.000282846	0	0	0	0	47	16	81	54	0	3	7	8	0	21	13	0
d__Bacteria	k__norank_d__Bacteria	p__Bacteroidota	c__Bacteroidia	o__Bacteroidales	f__Bacteroidaceae	g__Bacteroides	s__Bacteroides_coprocola_DSM_17136	ASV345	245	0.000277189	0	0	0	0	50	43	65	54	0	9	0	20	0	0	0	4
d__Bacteria	k__norank_d__Bacteria	p__Actinobacteriota	c__Actinobacteria	o__Propionibacteriales	f__Propionibacteriaceae	g__Tessaracoccus	s__metagenome_g__Tessaracoccus	ASV2030	232	0.000262481	173	0	34	0	0	0	7	16	0	0	0	0	2	0	0	0
d__Bacteria	k__norank_d__Bacteria	p__Firmicutes	c__Clostridia	o__Clostridiales	f__Clostridiaceae	g__Clostridium_sensu_stricto_1	s__unclassified_g__Clostridium_sensu_stricto_1	ASV2284	233	0.000263613	0	10	0	0	0	0	0	146	0	0	6	0	0	0	0	71
d__Bacteria	k__norank_d__Bacteria	p__Bacteroidota	c__Bacteroidia	o__Chitinophagales	f__Saprospiraceae	g__norank_f__Saprospiraceae	s__uncultured_Saprospiraceae_bacterium_g__norank	ASV2025	227	0.000256825	227	0	0	0	0	0	0	0	0	0	0	0	0	0	0	0
d__Bacteria	k__norank_d__Bacteria	p__Acidobacteriota	c__Acidobacteriae	o__Subgroup_2	f__norank_o__Subgroup_2	g__norank_f__norank_o__Subgroup_2	s__unclassified_g__norank_f__norank_o__Subgroup_2	ASV705	227	0.000256825	188	0	0	0	5	0	0	18	0	0	7	0	0	0	9	0
d__Bacteria	k__norank_d__Bacteria	p__Actinobacteriota	c__Actinobacteria	o__Pseudonocardiales	f__Pseudonocardiaceae	g__Amycolatopsis	s__unclassified_g__Amycolatopsis	ASV1667	254	0.000287372	0	0	184	70	0	0	0	0	0	0	0	0	0	0	0	0
d__Bacteria	k__norank_d__Bacteria	p__Bacteroidota	c__Bacteroidia	o__Bacteroidales	f__Bacteroidaceae	g__Bacteroides	s__unclassified_g__Bacteroides	ASV333	247	0.000279452	0	0	0	0	76	33	126	0	4	4	0	0	4	0	0	0
d__Bacteria	k__norank_d__Bacteria	p__Firmicutes	c__Clostridia	o__Lachnospirales	f__Lachnospiraceae	g__Butyrivibrio	s__unclassified_g__Butyrivibrio	ASV1638	231	0.00026135	0	0	149	82	0	0	0	0	0	0	0	0	0	0	0	0
d__Bacteria	k__norank_d__Bacteria	p__Acidobacteriota	c__Acidobacteriae	o__Acidobacteriales	f__norank_o__Acidobacteriales	g__norank_f__norank_o__Acidobacteriales	s__unclassified_g__norank_f__norank_o__Acidobacteriales	ASV3420	236	0.000267007	0	236	0	0	0	0	0	0	0	0	0	0	0	0	0	0
d__Bacteria	k__norank_d__Bacteria	p__Firmicutes	c__Clostridia	o__Oscillospirales	f__Ruminococcaceae	g__Subdoligranulum	s__unclassified_g__Subdoligranulum	ASV1028	236	0.000267007	0	0	0	83	0	47	51	0	0	0	11	0	0	0	44	0
d__Bacteria	k__norank_d__Bacteria	p__Bdellovibrionota	c__Bdellovibrionia	o__Bacteriovoracales	f__Bacteriovoracaceae	g__Peredibacter	s__Bacteriovorax_sp._EPC3	ASV1380	211	0.000238722	170	0	0	0	0	4	0	3	0	0	0	13	0	0	21	0
d__Bacteria	k__norank_d__Bacteria	p__Actinobacteriota	c__Actinobacteria	o__Propionibacteriales	f__Nocardioidaceae	g__Aeromicrobium	s__unclassified_g__Aeromicrobium	ASV487	226	0.000255693	133	0	40	0	9	9	22	0	0	0	6	0	0	0	7	0
d__Bacteria	k__norank_d__Bacteria	p__Actinobacteriota	c__Actinobacteria	o__Bifidobacteriales	f__Bifidobacteriaceae	g__Gardnerella	s__unclassified_g__Gardnerella	ASV2488	245	0.000277189	0	187	58	0	0	0	0	0	0	0	0	0	0	0	0	0
d__Bacteria	k__norank_d__Bacteria	p__Proteobacteria	c__Alphaproteobacteria	o__Rhizobiales	f__Xanthobacteraceae	g__norank_f__Xanthobacteraceae	s__unclassified_g__norank_f__Xanthobacteraceae	ASV3421	247	0.000279452	0	247	0	0	0	0	0	0	0	0	0	0	0	0	0	0
d__Bacteria	k__norank_d__Bacteria	p__Proteobacteria	c__Gammaproteobacteria	o__Burkholderiales	f__Rhodocyclaceae	g__Zoogloea	s__uncultured_Zoogloea_sp._g__Zoogloea	ASV1767	236	0.000267007	0	25	142	44	0	0	25	0	0	0	0	0	0	0	0	0
d__Bacteria	k__norank_d__Bacteria	p__Proteobacteria	c__Gammaproteobacteria	o__Burkholderiales	f__Rhodocyclaceae	g__Zoogloea	s__uncultured_Rhodocyclaceae_bacterium_g__Zoogloea	ASV1580	239	0.000270401	45	0	24	170	0	0	0	0	0	0	0	0	0	0	0	0
d__Bacteria	k__norank_d__Bacteria	p__Proteobacteria	c__Gammaproteobacteria	o__Xanthomonadales	f__Rhodanobacteraceae	g__Dyella	s__unclassified_g__Dyella	ASV1885	235	0.000265876	52	155	0	28	0	0	0	0	0	0	0	0	0	0	0	0
d__Bacteria	k__norank_d__Bacteria	p__Bacteroidota	c__Bacteroidia	o__Flavobacteriales	f__Weeksellaceae	g__Cloacibacterium	s__unclassified_g__Cloacibacterium	ASV821	226	0.000255693	0	0	123	78	3	0	0	20	2	0	0	0	0	0	0	0
d__Bacteria	k__norank_d__Bacteria	p__Spirochaetota	c__Spirochaetia	o__Spirochaetales	f__Spirochaetaceae	g__Treponema	s__Treponema_zuelzerae	ASV2403	217	0.000245511	0	18	199	0	0	0	0	0	0	0	0	0	0	0	0	0
d__Bacteria	k__norank_d__Bacteria	p__unclassified_k__norank_d__Bacteria	c__unclassified_k__norank_d__Bacteria	o__unclassified_k__norank_d__Bacteria	f__unclassified_k__norank_d__Bacteria	g__unclassified_k__norank_d__Bacteria	s__unclassified_k__norank_d__Bacteria	ASV9	235	0.000265876	0	0	0	0	36	37	67	26	0	9	5	0	0	51	0	4
d__Bacteria	k__norank_d__Bacteria	p__Firmicutes	c__Clostridia	o__Oscillospirales	f__Ruminococcaceae	g__Subdoligranulum	s__unclassified_g__Subdoligranulum	ASV329	218	0.000246642	0	0	0	63	102	0	0	24	0	0	0	29	0	0	0	0
d__Bacteria	k__norank_d__Bacteria	p__Proteobacteria	c__Gammaproteobacteria	o__Burkholderiales	f__Rhodocyclaceae	g__unclassified_f__Rhodocyclaceae	s__unclassified_f__Rhodocyclaceae	ASV1573	216	0.000244379	0	39	0	177	0	0	0	0	0	0	0	0	0	0	0	0
d__Bacteria	k__norank_d__Bacteria	p__Proteobacteria	c__Gammaproteobacteria	o__Cellvibrionales	f__Cellvibrionaceae	g__norank_f__Cellvibrionaceae	s__unclassified_g__norank_f__Cellvibrionaceae	ASV158	207	0.000234197	0	0	0	0	0	0	2	203	0	0	0	0	0	2	0	0
d__Bacteria	k__norank_d__Bacteria	p__Firmicutes	c__Bacilli	o__Lactobacillales	f__Streptococcaceae	g__Streptococcus	s__unclassified_g__Streptococcus	ASV1068	208	0.000235328	192	0	0	0	0	16	0	0	0	0	0	0	0	0	0	0
d__Bacteria	k__norank_d__Bacteria	p__Bacteroidota	c__Bacteroidia	o__Bacteroidales	f__Tannerellaceae	g__Parabacteroides	s__Parabacteroides_merdae	ASV336	228	0.000257956	0	0	0	0	73	55	74	11	2	0	6	0	4	0	0	3
d__Bacteria	k__norank_d__Bacteria	p__Proteobacteria	c__Gammaproteobacteria	o__Burkholderiales	f__Rhodocyclaceae	g__Dechloromonas	s__unclassified_g__Dechloromonas	ASV1158	228	0.000257956	0	0	124	68	0	10	21	0	0	0	5	0	0	0	0	0
d__Bacteria	k__norank_d__Bacteria	p__Proteobacteria	c__Alphaproteobacteria	o__Rhizobiales	f__Beijerinckiaceae	g__1174-901-12	s__uncultured_Alphaproteobacteria_bacterium_g__1174-901-12	ASV2540	217	0.000245511	0	158	44	0	0	0	11	0	4	0	0	0	0	0	0	0
d__Bacteria	k__norank_d__Bacteria	p__Bacteroidota	c__Bacteroidia	o__Bacteroidales	f__Prevotellaceae	g__unclassified_f__Prevotellaceae	s__unclassified_f__Prevotellaceae	ASV2265	213	0.000240985	0	0	193	0	0	0	0	13	0	0	7	0	0	0	0	0
d__Bacteria	k__norank_d__Bacteria	p__Bacteroidota	c__Bacteroidia	o__Bacteroidales	f__Tannerellaceae	g__Macellibacteroides	s__uncultured_bacterium_g__Macellibacteroides	ASV2402	210	0.000237591	0	0	210	0	0	0	0	0	0	0	0	0	0	0	0	0
d__Bacteria	k__norank_d__Bacteria	p__Proteobacteria	c__Alphaproteobacteria	o__Caulobacterales	f__Caulobacteraceae	g__Brevundimonas	s__unclassified_g__Brevundimonas	ASV1809	219	0.000247773	0	0	180	39	0	0	0	0	0	0	0	0	0	0	0	0
d__Bacteria	k__norank_d__Bacteria	p__Proteobacteria	c__Alphaproteobacteria	o__Rhizobiales	f__Xanthobacteraceae	g__norank_f__Xanthobacteraceae	s__Rhizobiales_bacterium_GAS113	ASV3422	223	0.000252299	0	223	0	0	0	0	0	0	0	0	0	0	0	0	0	0
d__Bacteria	k__norank_d__Bacteria	p__Firmicutes	c__Clostridia	o__Lachnospirales	f__Lachnospiraceae	g__Ruminococcus_torques_group	s__unclassified_g__Ruminococcus_torques_group	ASV254	221	0.000250036	0	0	0	0	59	70	43	28	0	0	0	15	3	3	0	0
d__Bacteria	k__norank_d__Bacteria	p__Proteobacteria	c__Gammaproteobacteria	o__Cellvibrionales	f__Cellvibrionaceae	g__Cellvibrio	s__unclassified_g__Cellvibrio	ASV790	207	0.000234197	77	0	89	26	2	0	9	4	0	0	0	0	0	0	0	0
d__Bacteria	k__norank_d__Bacteria	p__Firmicutes	c__Bacilli	o__Lactobacillales	f__Streptococcaceae	g__Streptococcus	s__unclassified_g__Streptococcus	ASV2026	187	0.000211569	187	0	0	0	0	0	0	0	0	0	0	0	0	0	0	0
d__Bacteria	k__norank_d__Bacteria	p__Actinobacteriota	c__Actinobacteria	o__Pseudonocardiales	f__Pseudonocardiaceae	g__Actinomycetospora	s__unclassified_g__Actinomycetospora	ASV1588	213	0.000240985	76	0	0	137	0	0	0	0	0	0	0	0	0	0	0	0
d__Bacteria	k__norank_d__Bacteria	p__Actinobacteriota	c__Actinobacteria	o__Frankiales	f__Acidothermaceae	g__Acidothermus	s__unclassified_g__Acidothermus	ASV3423	225	0.000254562	0	225	0	0	0	0	0	0	0	0	0	0	0	0	0	0
d__Bacteria	k__norank_d__Bacteria	p__Proteobacteria	c__Alphaproteobacteria	o__Rhizobiales	f__Beijerinckiaceae	g__Methylobacterium-Methylorubrum	s__unclassified_g__Methylobacterium-Methylorubrum	ASV1656	216	0.000244379	0	31	0	75	0	0	5	0	0	0	0	104	0	0	1	0
d__Bacteria	k__norank_d__Bacteria	p__Proteobacteria	c__Gammaproteobacteria	o__Pseudomonadales	f__Pseudomonadaceae	g__Pseudomonas	s__unclassified_g__Pseudomonas	ASV1591	211	0.000238722	83	0	0	128	0	0	0	0	0	0	0	0	0	0	0	0
d__Bacteria	k__norank_d__Bacteria	p__Deinococcota	c__Deinococci	o__Deinococcales	f__Deinococcaceae	g__Deinococcus	s__unclassified_g__Deinococcus	ASV3424	213	0.000240985	0	213	0	0	0	0	0	0	0	0	0	0	0	0	0	0
d__Bacteria	k__norank_d__Bacteria	p__Actinobacteriota	c__Actinobacteria	o__Propionibacteriales	f__Propionibacteriaceae	g__unclassified_f__Propionibacteriaceae	s__unclassified_f__Propionibacteriaceae	ASV1701	208	0.000235328	92	0	50	61	0	0	0	0	0	0	0	0	0	0	5	0
d__Bacteria	k__norank_d__Bacteria	p__Firmicutes	c__Clostridia	o__Lachnospirales	f__Lachnospiraceae	g__Dorea	s__unclassified_g__Dorea	ASV2027	199	0.000225146	199	0	0	0	0	0	0	0	0	0	0	0	0	0	0	0
d__Bacteria	k__norank_d__Bacteria	p__Firmicutes	c__Bacilli	o__Bacillales	f__Planococcaceae	g__Jeotgalibacillus	s__unclassified_g__Jeotgalibacillus	ASV2922	211	0.000238722	0	0	0	0	0	0	211	0	0	0	0	0	0	0	0	0
d__Bacteria	k__norank_d__Bacteria	p__Proteobacteria	c__Alphaproteobacteria	o__Rhizobiales	f__Beijerinckiaceae	g__Methylobacterium-Methylorubrum	s__unclassified_g__Methylobacterium-Methylorubrum	ASV435	210	0.000237591	0	0	7	0	16	0	0	183	2	0	0	0	0	0	2	0
d__Bacteria	k__norank_d__Bacteria	p__Bacteroidota	c__Bacteroidia	o__Flavobacteriales	f__Flavobacteriaceae	g__Confluentibacter	s__uncultured_bacterium_g__Confluentibacter	ASV4715	207	0.000234197	0	0	0	0	0	0	0	207	0	0	0	0	0	0	0	0
d__Bacteria	k__norank_d__Bacteria	p__Proteobacteria	c__Gammaproteobacteria	o__Burkholderiales	f__Comamonadaceae	g__Delftia	s__unclassified_g__Delftia	ASV63	207	0.000234197	0	0	0	0	19	17	50	81	0	0	15	0	0	12	13	0
d__Bacteria	k__norank_d__Bacteria	p__Bacteroidota	c__Bacteroidia	o__Bacteroidales	f__Bacteroidaceae	g__Bacteroides	s__unclassified_g__Bacteroides	ASV2028	202	0.00022854	193	0	0	0	0	0	0	0	0	0	0	9	0	0	0	0
d__Bacteria	k__norank_d__Bacteria	p__Proteobacteria	c__Gammaproteobacteria	o__Xanthomonadales	f__Rhodanobacteraceae	g__Dyella	s__unclassified_g__Dyella	ASV1709	208	0.000235328	110	0	39	59	0	0	0	0	0	0	0	0	0	0	0	0
d__Bacteria	k__norank_d__Bacteria	p__Proteobacteria	c__Alphaproteobacteria	o__Rhizobiales	f__Beijerinckiaceae	g__Methylobacterium-Methylorubrum	s__unclassified_g__Methylobacterium-Methylorubrum	ASV1679	208	0.000235328	13	82	33	67	0	0	0	0	7	0	0	0	0	0	0	6
d__Bacteria	k__norank_d__Bacteria	p__Proteobacteria	c__Gammaproteobacteria	o__Burkholderiales	f__Comamonadaceae	g__Comamonas	s__unclassified_g__Comamonas	ASV1586	213	0.000240985	0	32	43	138	0	0	0	0	0	0	0	0	0	0	0	0
d__Bacteria	k__norank_d__Bacteria	p__Actinobacteriota	c__Actinobacteria	o__Micrococcales	f__Micrococcales_Incertae_Sedis	g__Timonella	s__unclassified_g__Timonella	ASV1572	204	0.000230803	0	0	19	183	0	0	0	0	0	0	0	0	2	0	0	0
d__Bacteria	k__norank_d__Bacteria	p__Bacteroidota	c__Bacteroidia	o__Bacteroidales	f__Bacteroidaceae	g__Bacteroides	s__unclassified_g__Bacteroides	ASV372	203	0.000229671	0	0	0	0	29	37	107	30	0	0	0	0	0	0	0	0
d__Bacteria	k__norank_d__Bacteria	p__Firmicutes	c__Bacilli	o__Bacillales	f__Bacillaceae	g__Bacillus	s__Bacillus_smithii	ASV2400	194	0.000219489	0	0	0	0	0	0	0	0	0	0	1	0	0	0	193	0
d__Bacteria	k__norank_d__Bacteria	p__Proteobacteria	c__Alphaproteobacteria	o__Rhizobiales	f__Xanthobacteraceae	g__norank_f__Xanthobacteraceae	s__uncultured_forest_soil_bacterium_g__norank_f__Xanthobacteraceae	ASV3425	206	0.000233065	0	206	0	0	0	0	0	0	0	0	0	0	0	0	0	0
d__Bacteria	k__norank_d__Bacteria	p__Actinobacteriota	c__Thermoleophilia	o__Solirubrobacterales	f__Solirubrobacteraceae	g__Conexibacter	s__unclassified_g__Conexibacter	ASV3426	207	0.000234197	0	207	0	0	0	0	0	0	0	0	0	0	0	0	0	0
d__Bacteria	k__norank_d__Bacteria	p__Proteobacteria	c__Alphaproteobacteria	o__Sphingomonadales	f__Sphingomonadaceae	g__Sphingomonas	s__unclassified_g__Sphingomonas	ASV535	206	0.000233065	0	166	0	0	9	0	0	0	31	0	0	0	0	0	0	0
d__Bacteria	k__norank_d__Bacteria	p__Firmicutes	c__Bacilli	o__Bacillales	f__Bacillaceae	g__Bacillus	s__unclassified_g__Bacillus	ASV172	209	0.00023646	0	0	0	96	0	0	0	70	6	2	0	16	0	5	14	0
d__Bacteria	k__norank_d__Bacteria	p__Bacteroidota	c__Bacteroidia	o__Flavobacteriales	f__Flavobacteriaceae	g__Flavobacterium	s__unclassified_g__Flavobacterium	ASV1609	207	0.000234197	0	0	53	109	0	0	30	15	0	0	0	0	0	0	0	0
d__Bacteria	k__norank_d__Bacteria	p__Actinobacteriota	c__Actinobacteria	o__Frankiales	f__Acidothermaceae	g__Acidothermus	s__unclassified_g__Acidothermus	ASV3428	203	0.000229671	0	194	0	0	0	0	0	0	0	0	0	9	0	0	0	0
d__Bacteria	k__norank_d__Bacteria	p__Proteobacteria	c__Gammaproteobacteria	o__Pseudomonadales	f__Pseudomonadaceae	g__Pseudomonas	s__unclassified_g__Pseudomonas	ASV1584	196	0.000221752	54	0	0	142	0	0	0	0	0	0	0	0	0	0	0	0
d__Bacteria	k__norank_d__Bacteria	p__Bacteroidota	c__Bacteroidia	o__Bacteroidales	f__Bacteroidaceae	g__Bacteroides	s__Bacteroides_plebeius	ASV330	196	0.000221752	0	0	0	0	96	21	53	0	9	0	0	0	0	0	17	0
d__Bacteria	k__norank_d__Bacteria	p__Bacteroidota	c__Bacteroidia	o__Bacteroidales	f__Paludibacteraceae	g__Paludibacter	s__Paludibacter_propionicigenes_WB4	ASV429	204	0.000230803	0	0	65	122	17	0	0	0	0	0	0	0	0	0	0	0
d__Bacteria	k__norank_d__Bacteria	p__Actinobacteriota	c__Actinobacteria	o__Micrococcales	f__Microbacteriaceae	g__unclassified_f__Microbacteriaceae	s__unclassified_f__Microbacteriaceae	ASV2404	193	0.000218357	0	0	193	0	0	0	0	0	0	0	0	0	0	0	0	0
d__Bacteria	k__norank_d__Bacteria	p__Proteobacteria	c__Alphaproteobacteria	o__Rhizobiales	f__Xanthobacteraceae	g__norank_f__Xanthobacteraceae	s__unclassified_g__norank_f__Xanthobacteraceae	ASV3427	198	0.000224014	0	198	0	0	0	0	0	0	0	0	0	0	0	0	0	0
d__Bacteria	k__norank_d__Bacteria	p__Proteobacteria	c__Alphaproteobacteria	o__Rhodobacterales	f__Rhodobacteraceae	g__Paracoccus	s__Paracoccus_sulfuroxidans	ASV1275	191	0.000216095	67	15	50	48	0	5	2	3	0	0	0	0	0	0	1	0
d__Bacteria	k__norank_d__Bacteria	p__Firmicutes	c__Bacilli	o__Staphylococcales	f__Staphylococcaceae	g__Staphylococcus	s__unclassified_g__Staphylococcus	ASV2034	176	0.000199124	163	0	0	0	0	0	0	13	0	0	0	0	0	0	0	0
d__Bacteria	k__norank_d__Bacteria	p__Actinobacteriota	c__Actinobacteria	o__Propionibacteriales	f__Propionibacteriaceae	g__Propioniciclava	s__unclassified_g__Propioniciclava	ASV1700	190	0.000214963	79	0	39	63	0	0	0	9	0	0	0	0	0	0	0	0
d__Bacteria	k__norank_d__Bacteria	p__Actinobacteriota	c__Actinobacteria	o__Micrococcales	f__Microbacteriaceae	g__Leucobacter	s__unclassified_g__Leucobacter	ASV2029	178	0.000201387	178	0	0	0	0	0	0	0	0	0	0	0	0	0	0	0
d__Bacteria	k__norank_d__Bacteria	p__Actinobacteriota	c__Actinobacteria	o__Micrococcales	f__Bogoriellaceae	g__Georgenia	s__uncultured_bacterium_g__Georgenia	ASV4716	184	0.000208175	0	0	0	0	0	0	0	184	0	0	0	0	0	0	0	0
d__Bacteria	k__norank_d__Bacteria	p__Firmicutes	c__Clostridia	o__Lachnospirales	f__Lachnospiraceae	g__Marvinbryantia	s__unclassified_g__Marvinbryantia	ASV2031	179	0.000202518	179	0	0	0	0	0	0	0	0	0	0	0	0	0	0	0
d__Bacteria	k__norank_d__Bacteria	p__Acidobacteriota	c__Acidobacteriae	o__Acidobacteriales	f__norank_o__Acidobacteriales	g__norank_f__norank_o__Acidobacteriales	s__unclassified_g__norank_f__norank_o__Acidobacteriales	ASV3429	194	0.000219489	0	194	0	0	0	0	0	0	0	0	0	0	0	0	0	0
d__Bacteria	k__norank_d__Bacteria	p__Firmicutes	c__Bacilli	o__Bacillales	f__Planococcaceae	g__unclassified_f__Planococcaceae	s__unclassified_f__Planococcaceae	ASV1596	185	0.000209306	65	0	0	118	0	0	0	0	0	0	0	0	0	0	0	2
d__Bacteria	k__norank_d__Bacteria	p__Bacteroidota	c__Bacteroidia	o__Bacteroidales	f__Paludibacteraceae	g__Paludibacter	s__uncultured_bacterium_g__Paludibacter	ASV118	186	0.000210438	0	27	124	0	8	9	0	12	0	0	0	0	0	6	0	0
d__Bacteria	k__norank_d__Bacteria	p__Proteobacteria	c__Gammaproteobacteria	o__Cellvibrionales	f__Cellvibrionaceae	g__Cellvibrio	s__unclassified_g__Cellvibrio	ASV4717	178	0.000201387	0	0	0	0	0	0	0	178	0	0	0	0	0	0	0	0
d__Bacteria	k__norank_d__Bacteria	p__Proteobacteria	c__Gammaproteobacteria	o__Burkholderiales	f__Comamonadaceae	g__unclassified_f__Comamonadaceae	s__unclassified_f__Comamonadaceae	ASV1603	180	0.000203649	0	0	72	108	0	0	0	0	0	0	0	0	0	0	0	0
d__Bacteria	k__norank_d__Bacteria	p__Firmicutes	c__Clostridia	o__Lachnospirales	f__Lachnospiraceae	g__unclassified_f__Lachnospiraceae	s__unclassified_f__Lachnospiraceae	ASV2037	179	0.000202518	171	0	0	0	0	0	0	0	0	0	0	0	0	0	8	0
d__Bacteria	k__norank_d__Bacteria	p__Actinobacteriota	c__Actinobacteria	o__Frankiales	f__norank_o__Frankiales	g__norank_f__norank_o__Frankiales	s__unclassified_g__norank_f__norank_o__Frankiales	ASV2103	175	0.000197992	86	57	0	0	0	0	29	3	0	0	0	0	0	0	0	0
d__Bacteria	k__norank_d__Bacteria	p__Proteobacteria	c__Gammaproteobacteria	o__Burkholderiales	f__Oxalobacteraceae	g__Massilia	s__unclassified_g__Massilia	ASV1574	190	0.000214963	0	0	0	190	0	0	0	0	0	0	0	0	0	0	0	0
d__Bacteria	k__norank_d__Bacteria	p__Proteobacteria	c__Alphaproteobacteria	o__Rhizobiales	f__Xanthobacteraceae	g__norank_f__Xanthobacteraceae	s__uncultured_forest_soil_bacterium_g__norank_f__Xanthobacteraceae	ASV3430	187	0.000211569	0	187	0	0	0	0	0	0	0	0	0	0	0	0	0	0
d__Bacteria	k__norank_d__Bacteria	p__Firmicutes	c__Clostridia	o__Lachnospirales	f__Lachnospiraceae	g__unclassified_f__Lachnospiraceae	s__unclassified_f__Lachnospiraceae	ASV2032	165	0.000186679	165	0	0	0	0	0	0	0	0	0	0	0	0	0	0	0
d__Bacteria	k__norank_d__Bacteria	p__Proteobacteria	c__Gammaproteobacteria	o__Burkholderiales	f__Rhodocyclaceae	g__unclassified_f__Rhodocyclaceae	s__unclassified_f__Rhodocyclaceae	ASV1614	180	0.000203649	0	0	79	101	0	0	0	0	0	0	0	0	0	0	0	0
d__Bacteria	k__norank_d__Bacteria	p__Proteobacteria	c__Gammaproteobacteria	o__Enterobacterales	f__Enterobacteriaceae	g__unclassified_f__Enterobacteriaceae	s__unclassified_f__Enterobacteriaceae	ASV2033	166	0.00018781	166	0	0	0	0	0	0	0	0	0	0	0	0	0	0	0
d__Bacteria	k__norank_d__Bacteria	p__Firmicutes	c__Bacilli	o__Lactobacillales	f__Carnobacteriaceae	g__Atopostipes	s__uncultured_bacterium_g__Atopostipes	ASV1644	172	0.000194598	89	0	0	83	0	0	0	0	0	0	0	0	0	0	0	0
d__Bacteria	k__norank_d__Bacteria	p__Proteobacteria	c__Alphaproteobacteria	o__Rhizobiales	f__Beijerinckiaceae	g__Methylobacterium-Methylorubrum	s__unclassified_g__Methylobacterium-Methylorubrum	ASV368	190	0.000214963	0	78	0	32	34	0	1	0	6	0	15	12	0	0	0	12
d__Bacteria	k__norank_d__Bacteria	p__Bacteroidota	c__Bacteroidia	o__Bacteroidales	f__Bacteroidaceae	g__Bacteroides	s__unclassified_g__Bacteroides	ASV35	184	0.000208175	0	0	0	0	55	10	0	37	0	11	0	30	0	20	21	0
d__Bacteria	k__norank_d__Bacteria	p__Firmicutes	c__Clostridia	o__Lachnospirales	f__Lachnospiraceae	g__Ruminococcus_gnavus_group	s__unclassified_g__Ruminococcus_gnavus_group	ASV404	187	0.000211569	0	22	119	0	18	0	28	0	0	0	0	0	0	0	0	0
d__Bacteria	k__norank_d__Bacteria	p__Proteobacteria	c__Gammaproteobacteria	o__Aeromonadales	f__Aeromonadaceae	g__Aeromonas	s__unclassified_g__Aeromonas	ASV1084	165	0.000186679	94	8	49	0	0	14	0	0	0	0	0	0	0	0	0	0
d__Bacteria	k__norank_d__Bacteria	p__Firmicutes	c__Clostridia	o__Lachnospirales	f__Lachnospiraceae	g__unclassified_f__Lachnospiraceae	s__unclassified_f__Lachnospiraceae	ASV2035	169	0.000191204	169	0	0	0	0	0	0	0	0	0	0	0	0	0	0	0
d__Bacteria	k__norank_d__Bacteria	p__Proteobacteria	c__Alphaproteobacteria	o__Rhizobiales	f__Xanthobacteraceae	g__norank_f__Xanthobacteraceae	s__unclassified_g__norank_f__Xanthobacteraceae	ASV3431	182	0.000205912	0	182	0	0	0	0	0	0	0	0	0	0	0	0	0	0
d__Bacteria	k__norank_d__Bacteria	p__Desulfobacterota	c__Desulfobacteria	o__Desulfobacterales	f__Desulfosarcinaceae	g__unclassified_f__Desulfosarcinaceae	s__unclassified_f__Desulfosarcinaceae	ASV2038	152	0.000171971	147	0	0	0	0	0	0	0	0	0	0	0	0	0	0	5
d__Bacteria	k__norank_d__Bacteria	p__Actinobacteriota	c__Actinobacteria	o__Micrococcales	f__Intrasporangiaceae	g__unclassified_f__Intrasporangiaceae	s__unclassified_f__Intrasporangiaceae	ASV2036	164	0.000185547	164	0	0	0	0	0	0	0	0	0	0	0	0	0	0	0
d__Bacteria	k__norank_d__Bacteria	p__Bacteroidota	c__Bacteroidia	o__Bacteroidales	f__Tannerellaceae	g__Parabacteroides	s__unclassified_g__Parabacteroides	ASV108	175	0.000197992	120	0	0	0	20	0	22	9	0	0	0	0	0	4	0	0
d__Bacteria	k__norank_d__Bacteria	p__Firmicutes	c__Clostridia	o__Lachnospirales	f__Lachnospiraceae	g__CHKCI001	s__uncultured_bacterium_g__CHKCI001	ASV1063	180	0.000203649	0	0	0	167	0	13	0	0	0	0	0	0	0	0	0	0
d__Bacteria	k__norank_d__Bacteria	p__Actinobacteriota	c__Actinobacteria	o__Micrococcales	f__Intrasporangiaceae	g__Janibacter	s__Janibacter_limosus	ASV1730	170	0.000192336	113	0	0	57	0	0	0	0	0	0	0	0	0	0	0	0
d__Bacteria	k__norank_d__Bacteria	p__Bacteroidota	c__Bacteroidia	o__Bacteroidales	f__Prolixibacteraceae	g__WCHB1-32	s__uncultured_soil_bacterium_g__WCHB1-32	ASV1576	176	0.000199124	0	0	0	176	0	0	0	0	0	0	0	0	0	0	0	0
d__Bacteria	k__norank_d__Bacteria	p__Actinobacteriota	c__Actinobacteria	o__Micrococcales	f__Intrasporangiaceae	g__unclassified_f__Intrasporangiaceae	s__unclassified_f__Intrasporangiaceae	ASV3290	195	0.00022062	0	0	0	0	0	0	0	0	0	192	0	0	0	0	3	0
d__Bacteria	k__norank_d__Bacteria	p__Proteobacteria	c__Gammaproteobacteria	o__Burkholderiales	f__Burkholderiaceae	g__Burkholderia-Caballeronia-Paraburkholderia	s__unclassified_g__Burkholderia-Caballeronia-Paraburkholderia	ASV3432	175	0.000197992	0	175	0	0	0	0	0	0	0	0	0	0	0	0	0	0
d__Bacteria	k__norank_d__Bacteria	p__Actinobacteriota	c__Actinobacteria	o__Micrococcales	f__Microbacteriaceae	g__Amnibacterium	s__uncultured_bacterium_g__Amnibacterium	ASV2245	167	0.000188941	0	37	0	0	0	0	48	48	25	0	9	0	0	0	0	0
d__Bacteria	k__norank_d__Bacteria	p__Bacteroidota	c__Bacteroidia	o__Bacteroidales	f__Bacteroidaceae	g__Bacteroides	s__unclassified_g__Bacteroides	ASV826	171	0.000193467	0	0	168	0	3	0	0	0	0	0	0	0	0	0	0	0
d__Bacteria	k__norank_d__Bacteria	p__Bacteroidota	c__Bacteroidia	o__Bacteroidales	f__Bacteroidaceae	g__Bacteroides	s__unclassified_g__Bacteroides	ASV1038	167	0.000188941	0	0	105	0	0	29	0	33	0	0	0	0	0	0	0	0
d__Bacteria	k__norank_d__Bacteria	p__Bdellovibrionota	c__Oligoflexia	o__0319-6G20	f__norank_o__0319-6G20	g__norank_f__norank_o__0319-6G20	s__uncultured_Roseobacter_sp._g__norank_f__norank	ASV2039	164	0.000185547	164	0	0	0	0	0	0	0	0	0	0	0	0	0	0	0
d__Bacteria	k__norank_d__Bacteria	p__Firmicutes	c__Clostridia	o__Clostridiales	f__Clostridiaceae	g__Clostridium_sensu_stricto_7	s__Clostridium_thermopalmarium	ASV5252	175	0.000197992	0	0	0	0	0	0	0	0	0	0	0	0	0	0	175	0
d__Bacteria	k__norank_d__Bacteria	p__Firmicutes	c__Clostridia	o__Oscillospirales	f__Ruminococcaceae	g__Faecalibacterium	s__unclassified_g__Faecalibacterium	ASV154	173	0.00019573	0	0	0	95	38	36	0	0	0	0	0	0	0	4	0	0
d__Bacteria	k__norank_d__Bacteria	p__Actinobacteriota	c__Actinobacteria	o__Micrococcales	f__Micrococcaceae	g__unclassified_f__Micrococcaceae	s__unclassified_f__Micrococcaceae	ASV2048	159	0.00017989	137	0	0	0	0	0	13	0	0	0	0	0	0	0	9	0
d__Bacteria	k__norank_d__Bacteria	p__Proteobacteria	c__Gammaproteobacteria	o__Burkholderiales	f__Oxalobacteraceae	g__Massilia	s__unclassified_g__Massilia	ASV1579	167	0.000188941	0	0	0	167	0	0	0	0	0	0	0	0	0	0	0	0
d__Bacteria	k__norank_d__Bacteria	p__Acidobacteriota	c__Acidobacteriae	o__Acidobacteriales	f__norank_o__Acidobacteriales	g__norank_f__norank_o__Acidobacteriales	s__uncultured_bacterium_g__norank_f__norank_o__Acidobacteriales	ASV3433	171	0.000193467	0	171	0	0	0	0	0	0	0	0	0	0	0	0	0	0
d__Bacteria	k__norank_d__Bacteria	p__Actinobacteriota	c__Actinobacteria	o__Micrococcales	f__Bogoriellaceae	g__Georgenia	s__Georgenia_satyanarayanai	ASV4718	165	0.000186679	0	0	0	0	0	0	0	165	0	0	0	0	0	0	0	0
d__Bacteria	k__norank_d__Bacteria	p__Firmicutes	c__Clostridia	o__Lachnospirales	f__Lachnospiraceae	g__Dorea	s__unclassified_g__Dorea	ASV347	168	0.000190073	0	0	0	116	45	0	0	0	0	0	7	0	0	0	0	0
d__Bacteria	k__norank_d__Bacteria	p__Firmicutes	c__Clostridia	o__Clostridiales	f__Clostridiaceae	g__Clostridium_sensu_stricto_1	s__unclassified_g__Clostridium_sensu_stricto_1	ASV2063	155	0.000175365	110	0	45	0	0	0	0	0	0	0	0	0	0	0	0	0
d__Bacteria	k__norank_d__Bacteria	p__Firmicutes	c__Bacilli	o__Lactobacillales	f__Leuconostocaceae	g__Weissella	s__unclassified_g__Weissella	ASV2046	159	0.00017989	145	0	0	0	0	0	0	0	0	0	3	11	0	0	0	0
d__Bacteria	k__norank_d__Bacteria	p__Proteobacteria	c__Gammaproteobacteria	o__Burkholderiales	f__Alcaligenaceae	g__unclassified_f__Alcaligenaceae	s__unclassified_f__Alcaligenaceae	ASV3142	166	0.00018781	0	0	0	0	0	0	8	158	0	0	0	0	0	0	0	0
d__Bacteria	k__norank_d__Bacteria	p__Proteobacteria	c__Gammaproteobacteria	o__Gammaproteobacteria_Incertae_Sedis	f__unclassified_o__Gammaproteobacteria_Incertae_Sedis	g__Acidibacter	s__unclassified_g__Acidibacter	ASV3434	181	0.000204781	0	181	0	0	0	0	0	0	0	0	0	0	0	0	0	0
d__Bacteria	k__norank_d__Bacteria	p__Actinobacteriota	c__Acidimicrobiia	o__IMCC26256	f__norank_o__IMCC26256	g__norank_f__norank_o__IMCC26256	s__unclassified_g__norank_f__norank_o__IMCC26256	ASV2049	154	0.000174233	131	0	0	0	0	0	0	0	0	0	0	0	0	0	0	23
d__Bacteria	k__norank_d__Bacteria	p__Proteobacteria	c__Gammaproteobacteria	o__Burkholderiales	f__Rhodocyclaceae	g__Uliginosibacterium	s__unclassified_g__Uliginosibacterium	ASV1655	169	0.000191204	0	44	48	77	0	0	0	0	0	0	0	0	0	0	0	0
d__Bacteria	k__norank_d__Bacteria	p__Firmicutes	c__Bacilli	o__Staphylococcales	f__Staphylococcaceae	g__Staphylococcus	s__unclassified_g__Staphylococcus	ASV1598	173	0.00019573	0	24	26	123	0	0	0	0	0	0	0	0	0	0	0	0
d__Bacteria	k__norank_d__Bacteria	p__Firmicutes	c__Bacilli	o__Lactobacillales	f__Carnobacteriaceae	g__Carnobacterium	s__unclassified_g__Carnobacterium	ASV1928	164	0.000185547	0	0	142	22	0	0	0	0	0	0	0	0	0	0	0	0
d__Bacteria	k__norank_d__Bacteria	p__Proteobacteria	c__Alphaproteobacteria	o__Rhizobiales	f__Beijerinckiaceae	g__Bosea	s__unclassified_g__Bosea	ASV2040	153	0.000173102	153	0	0	0	0	0	0	0	0	0	0	0	0	0	0	0
d__Bacteria	k__norank_d__Bacteria	p__Proteobacteria	c__Gammaproteobacteria	o__Burkholderiales	f__Rhodocyclaceae	g__Zoogloea	s__unclassified_g__Zoogloea	ASV2406	154	0.000174233	0	0	151	0	0	0	0	0	0	0	0	0	1	0	0	2
d__Bacteria	k__norank_d__Bacteria	p__Proteobacteria	c__Gammaproteobacteria	o__Burkholderiales	f__Rhodocyclaceae	g__Dechlorobacter	s__uncultured_bacterium_g__Dechlorobacter	ASV1705	162	0.000183284	0	0	102	60	0	0	0	0	0	0	0	0	0	0	0	0
d__Bacteria	k__norank_d__Bacteria	p__Bacteroidota	c__Bacteroidia	o__Bacteroidales	f__Bacteroidaceae	g__Bacteroides	s__Bacteroides_eggerthii	ASV341	155	0.000175365	0	0	0	0	50	14	68	23	0	0	0	0	0	0	0	0
d__Bacteria	k__norank_d__Bacteria	p__Desulfobacterota	c__unclassified_p__Desulfobacterota	o__unclassified_p__Desulfobacterota	f__unclassified_p__Desulfobacterota	g__unclassified_p__Desulfobacterota	s__unclassified_p__Desulfobacterota	ASV1696	170	0.000192336	0	0	103	67	0	0	0	0	0	0	0	0	0	0	0	0
d__Bacteria	k__norank_d__Bacteria	p__Gemmatimonadota	c__Longimicrobia	o__Longimicrobiales	f__Longimicrobiaceae	g__norank_f__Longimicrobiaceae	s__uncultured_bacterium_g__norank_f__Longimicrobiaceae	ASV4719	144	0.00016292	0	0	0	0	0	0	0	144	0	0	0	0	0	0	0	0
d__Bacteria	k__norank_d__Bacteria	p__Acidobacteriota	c__Acidobacteriae	o__Subgroup_2	f__norank_o__Subgroup_2	g__norank_f__norank_o__Subgroup_2	s__unclassified_g__norank_f__norank_o__Subgroup_2	ASV3435	160	0.000181022	0	160	0	0	0	0	0	0	0	0	0	0	0	0	0	0
d__Bacteria	k__norank_d__Bacteria	p__Proteobacteria	c__Gammaproteobacteria	o__Burkholderiales	f__Comamonadaceae	g__Azohydromonas	s__uncultured_bacterium_g__Azohydromonas	ASV2041	150	0.000169708	150	0	0	0	0	0	0	0	0	0	0	0	0	0	0	0
d__Bacteria	k__norank_d__Bacteria	p__Firmicutes	c__Clostridia	o__Lachnospirales	f__Lachnospiraceae	g__Lachnospiraceae_NK4A136_group	s__Lachnospiraceae_bacterium_GAM79	ASV385	160	0.000181022	0	0	85	0	22	0	43	0	2	0	0	5	3	0	0	0
d__Bacteria	k__norank_d__Bacteria	p__Bacteroidota	c__Bacteroidia	o__Bacteroidales	f__Bacteroidaceae	g__Bacteroides	s__unclassified_g__Bacteroides	ASV68	163	0.000184416	0	0	0	0	56	0	88	0	0	0	0	8	0	11	0	0
d__Bacteria	k__norank_d__Bacteria	p__Proteobacteria	c__Alphaproteobacteria	o__Rhizobiales	f__Xanthobacteraceae	g__norank_f__Xanthobacteraceae	s__uncultured_Pseudolabrys_sp._g__norank	ASV3436	163	0.000184416	0	163	0	0	0	0	0	0	0	0	0	0	0	0	0	0
d__Bacteria	k__norank_d__Bacteria	p__Proteobacteria	c__Alphaproteobacteria	o__Elsterales	f__norank_o__Elsterales	g__norank_f__norank_o__Elsterales	s__uncultured_bacterium_g__norank_f__norank_o__Elsterales	ASV2238	158	0.000178759	2	156	0	0	0	0	0	0	0	0	0	0	0	0	0	0
d__Bacteria	k__norank_d__Bacteria	p__Proteobacteria	c__Gammaproteobacteria	o__Burkholderiales	f__Rhodocyclaceae	g__Dechloromonas	s__unclassified_g__Dechloromonas	ASV2042	147	0.000166314	147	0	0	0	0	0	0	0	0	0	0	0	0	0	0	0
d__Bacteria	k__norank_d__Bacteria	p__Firmicutes	c__Bacilli	o__Staphylococcales	f__Staphylococcaceae	g__Staphylococcus	s__unclassified_g__Staphylococcus	ASV2043	145	0.000164051	145	0	0	0	0	0	0	0	0	0	0	0	0	0	0	0
d__Bacteria	k__norank_d__Bacteria	p__Proteobacteria	c__Gammaproteobacteria	o__Burkholderiales	f__Rhodocyclaceae	g__unclassified_f__Rhodocyclaceae	s__unclassified_f__Rhodocyclaceae	ASV1641	154	0.000174233	0	0	71	83	0	0	0	0	0	0	0	0	0	0	0	0
d__Bacteria	k__norank_d__Bacteria	p__Bacteroidota	c__Bacteroidia	o__Bacteroidales	f__Tannerellaceae	g__Macellibacteroides	s__unclassified_g__Macellibacteroides	ASV386	153	0.000173102	0	0	97	0	25	8	0	0	0	0	0	23	0	0	0	0
d__Bacteria	k__norank_d__Bacteria	p__Firmicutes	c__Clostridia	o__Peptostreptococcales-Tissierellales	f__Anaerovoracaceae	g__unclassified_f__Anaerovoracaceae	s__unclassified_f__Anaerovoracaceae	ASV2044	146	0.000165182	146	0	0	0	0	0	0	0	0	0	0	0	0	0	0	0
d__Bacteria	k__norank_d__Bacteria	p__Firmicutes	c__Clostridia	o__Lachnospirales	f__Lachnospiraceae	g__Agathobacter	s__unclassified_g__Agathobacter	ASV331	154	0.000174233	0	0	0	0	84	37	0	32	0	0	0	0	1	0	0	0
d__Bacteria	k__norank_d__Bacteria	p__Actinobacteriota	c__Acidimicrobiia	o__norank_c__Acidimicrobiia	f__norank_o__norank_c__Acidimicrobiia	g__norank_f__norank_o__norank_c__Acidimicrobiia	s__uncultured_forest_soil_bacterium_g__norank_f__norank_o__norank_c__Acidimicrobiia	ASV3437	147	0.000166314	0	147	0	0	0	0	0	0	0	0	0	0	0	0	0	0
d__Bacteria	k__norank_d__Bacteria	p__Actinobacteriota	c__Actinobacteria	o__Bifidobacteriales	f__Bifidobacteriaceae	g__Bifidobacterium	s__unclassified_g__Bifidobacterium	ASV146	148	0.000167445	0	0	64	0	27	0	0	42	3	0	7	0	0	5	0	0
d__Bacteria	k__norank_d__Bacteria	p__Firmicutes	c__Bacilli	o__Bacillales	f__Bacillaceae	g__Bacillus	s__unclassified_g__Bacillus	ASV2047	142	0.000160657	142	0	0	0	0	0	0	0	0	0	0	0	0	0	0	0
d__Bacteria	k__norank_d__Bacteria	p__Firmicutes	c__Clostridia	o__Oscillospirales	f__Ruminococcaceae	g__Ruminococcus	s__unclassified_g__Ruminococcus	ASV357	153	0.000173102	0	0	13	31	35	12	31	12	3	5	7	4	0	0	0	0
d__Bacteria	k__norank_d__Bacteria	p__Bacteroidota	c__Bacteroidia	o__Bacteroidales	f__Prolixibacteraceae	g__Roseimarinus	s__uncultured_bacterium_g__Roseimarinus	ASV2407	146	0.000165182	0	0	146	0	0	0	0	0	0	0	0	0	0	0	0	0
d__Bacteria	k__norank_d__Bacteria	p__Actinobacteriota	c__Actinobacteria	o__Micrococcales	f__Microbacteriaceae	g__Microbacterium	s__unclassified_g__Microbacterium	ASV2053	138	0.000156131	124	0	11	0	0	0	0	0	0	0	0	3	0	0	0	0
d__Bacteria	k__norank_d__Bacteria	p__Bacteroidota	c__Bacteroidia	o__Bacteroidales	f__Bacteroidaceae	g__Bacteroides	s__Bacteroides_coprophilus	ASV364	146	0.000165182	0	0	0	0	36	34	19	37	0	3	0	17	0	0	0	0
d__Bacteria	k__norank_d__Bacteria	p__Proteobacteria	c__Gammaproteobacteria	o__Burkholderiales	f__Rhodocyclaceae	g__unclassified_f__Rhodocyclaceae	s__unclassified_f__Rhodocyclaceae	ASV2408	146	0.000165182	0	0	146	0	0	0	0	0	0	0	0	0	0	0	0	0
d__Bacteria	k__norank_d__Bacteria	p__Acidobacteriota	c__Acidobacteriae	o__Subgroup_2	f__norank_o__Subgroup_2	g__norank_f__norank_o__Subgroup_2	s__uncultured_Holophaga_sp._g__norank_f__norank_o__Subgroup_2	ASV2327	149	0.000168576	0	116	0	0	0	0	9	4	0	0	3	3	0	0	14	0
d__Bacteria	k__norank_d__Bacteria	p__Proteobacteria	c__Gammaproteobacteria	o__Burkholderiales	f__Oxalobacteraceae	g__Massilia	s__unclassified_g__Massilia	ASV1581	145	0.000164051	0	0	0	145	0	0	0	0	0	0	0	0	0	0	0	0
d__Bacteria	k__norank_d__Bacteria	p__Acidobacteriota	c__Acidobacteriae	o__Subgroup_2	f__norank_o__Subgroup_2	g__norank_f__norank_o__Subgroup_2	s__uncultured_Acidobacteria_bacterium_g__norank_f__norank_o__Subgroup_2	ASV3438	148	0.000167445	0	148	0	0	0	0	0	0	0	0	0	0	0	0	0	0
d__Bacteria	k__norank_d__Bacteria	p__Proteobacteria	c__Alphaproteobacteria	o__Micropepsales	f__Micropepsaceae	g__norank_f__Micropepsaceae	s__unclassified_g__norank_f__Micropepsaceae	ASV2066	140	0.000158394	106	0	34	0	0	0	0	0	0	0	0	0	0	0	0	0
d__Bacteria	k__norank_d__Bacteria	p__Bacteroidota	c__Bacteroidia	o__Bacteroidales	f__Prevotellaceae	g__unclassified_f__Prevotellaceae	s__unclassified_f__Prevotellaceae	ASV2409	134	0.000151606	0	0	134	0	0	0	0	0	0	0	0	0	0	0	0	0
d__Bacteria	k__norank_d__Bacteria	p__Acidobacteriota	c__Acidobacteriae	o__Solibacterales	f__Solibacteraceae	g__Candidatus_Solibacter	s__unclassified_g__Candidatus_Solibacter	ASV3439	147	0.000166314	0	147	0	0	0	0	0	0	0	0	0	0	0	0	0	0
d__Bacteria	k__norank_d__Bacteria	p__Actinobacteriota	c__Actinobacteria	o__Micrococcales	f__unclassified_o__Micrococcales	g__unclassified_o__Micrococcales	s__unclassified_o__Micrococcales	ASV2126	143	0.000161788	67	0	0	0	0	0	0	76	0	0	0	0	0	0	0	0
d__Bacteria	k__norank_d__Bacteria	p__Bacteroidota	c__Bacteroidia	o__Bacteroidales	f__unclassified_o__Bacteroidales	g__unclassified_o__Bacteroidales	s__unclassified_o__Bacteroidales	ASV1583	147	0.000166314	0	0	0	147	0	0	0	0	0	0	0	0	0	0	0	0
d__Bacteria	k__norank_d__Bacteria	p__Acidobacteriota	c__Acidobacteriae	o__Bryobacterales	f__Bryobacteraceae	g__Bryobacter	s__unclassified_g__Bryobacter	ASV3440	152	0.000171971	0	152	0	0	0	0	0	0	0	0	0	0	0	0	0	0
d__Bacteria	k__norank_d__Bacteria	p__Firmicutes	c__Bacilli	o__Lactobacillales	f__Carnobacteriaceae	g__Carnobacterium	s__unclassified_g__Carnobacterium	ASV113	142	0.000160657	0	0	0	107	0	0	16	0	0	0	0	13	0	6	0	0
d__Bacteria	k__norank_d__Bacteria	p__Firmicutes	c__Clostridia	o__Lachnospirales	f__Lachnospiraceae	g__Coprococcus	s__unclassified_g__Coprococcus	ASV17	144	0.00016292	0	0	0	0	0	0	64	10	0	5	0	0	0	38	27	0
d__Bacteria	k__norank_d__Bacteria	p__Spirochaetota	c__Spirochaetia	o__Spirochaetales	f__Spirochaetaceae	g__Treponema	s__unclassified_g__Treponema	ASV1823	143	0.000161788	0	34	73	36	0	0	0	0	0	0	0	0	0	0	0	0
d__Bacteria	k__norank_d__Bacteria	p__Actinobacteriota	c__Actinobacteria	o__Actinomycetales	f__Actinomycetaceae	g__Actinomyces	s__Schaalia_odontolytica	ASV2055	138	0.000156131	132	0	0	0	0	0	0	0	0	0	0	0	6	0	0	0
d__Bacteria	k__norank_d__Bacteria	p__Actinobacteriota	c__Actinobacteria	o__Propionibacteriales	f__Nocardioidaceae	g__Marmoricola	s__unclassified_g__Marmoricola	ASV2057	135	0.000152737	122	0	0	0	0	0	0	0	0	10	0	0	3	0	0	0
d__Bacteria	k__norank_d__Bacteria	p__Actinobacteriota	c__Acidimicrobiia	o__Microtrichales	f__Iamiaceae	g__Iamia	s__unclassified_g__Iamia	ASV2076	130	0.00014708	95	0	0	0	0	0	0	0	0	0	0	0	0	0	0	35
d__Bacteria	k__norank_d__Bacteria	p__Proteobacteria	c__Alphaproteobacteria	o__Rhizobiales	f__Xanthobacteraceae	g__norank_f__Xanthobacteraceae	s__unclassified_g__norank_f__Xanthobacteraceae	ASV3441	143	0.000161788	0	143	0	0	0	0	0	0	0	0	0	0	0	0	0	0
d__Bacteria	k__norank_d__Bacteria	p__Firmicutes	c__Clostridia	o__Clostridiales	f__Clostridiaceae	g__Clostridium_sensu_stricto_1	s__unclassified_g__Clostridium_sensu_stricto_1	ASV1697	136	0.000153868	74	0	0	62	0	0	0	0	0	0	0	0	0	0	0	0
d__Bacteria	k__norank_d__Bacteria	p__Proteobacteria	c__Gammaproteobacteria	o__Competibacterales	f__Competibacteraceae	g__Candidatus_Competibacter	s__unclassified_g__Candidatus_Competibacter	ASV1103	136	0.000153868	0	0	0	0	0	11	10	0	0	0	1	0	0	0	114	0
d__Bacteria	k__norank_d__Bacteria	p__Proteobacteria	c__Alphaproteobacteria	o__Rhizobiales	f__Beijerinckiaceae	g__Bosea	s__unclassified_g__Bosea	ASV1392	138	0.000156131	114	0	20	0	0	4	0	0	0	0	0	0	0	0	0	0
d__Bacteria	k__norank_d__Bacteria	p__Firmicutes	c__Bacilli	o__Staphylococcales	f__Staphylococcaceae	g__Staphylococcus	s__unclassified_g__Staphylococcus	ASV1594	147	0.000166314	0	0	0	128	0	0	0	0	0	0	0	10	0	0	9	0
d__Bacteria	k__norank_d__Bacteria	p__Actinobacteriota	c__Actinobacteria	o__Corynebacteriales	f__Mycobacteriaceae	g__Mycobacterium	s__unclassified_g__Mycobacterium	ASV3442	150	0.000169708	0	150	0	0	0	0	0	0	0	0	0	0	0	0	0	0
d__Bacteria	k__norank_d__Bacteria	p__Actinobacteriota	c__Thermoleophilia	o__Solirubrobacterales	f__Solirubrobacteraceae	g__unclassified_f__Solirubrobacteraceae	s__unclassified_f__Solirubrobacteraceae	ASV1202	145	0.000164051	0	138	0	0	0	7	0	0	0	0	0	0	0	0	0	0
d__Bacteria	k__norank_d__Bacteria	p__Proteobacteria	c__Gammaproteobacteria	o__Burkholderiales	f__Oxalobacteraceae	g__unclassified_f__Oxalobacteraceae	s__unclassified_f__Oxalobacteraceae	ASV2050	134	0.000151606	134	0	0	0	0	0	0	0	0	0	0	0	0	0	0	0
d__Bacteria	k__norank_d__Bacteria	p__Firmicutes	c__Clostridia	o__Peptostreptococcales-Tissierellales	f__Anaerovoracaceae	g__unclassified_f__Anaerovoracaceae	s__unclassified_f__Anaerovoracaceae	ASV1585	140	0.000158394	0	0	0	140	0	0	0	0	0	0	0	0	0	0	0	0
d__Bacteria	k__norank_d__Bacteria	p__Bacteroidota	c__Bacteroidia	o__Bacteroidales	f__Dysgonomonadaceae	g__norank_f__Dysgonomonadaceae	s__uncultured_bacterium_g__norank_f__Dysgonomonadaceae	ASV2051	136	0.000153868	136	0	0	0	0	0	0	0	0	0	0	0	0	0	0	0
d__Bacteria	k__norank_d__Bacteria	p__Actinobacteriota	c__Actinobacteria	o__Propionibacteriales	f__Nocardioidaceae	g__Nocardioides	s__unclassified_g__Nocardioides	ASV549	138	0.000156131	0	0	101	30	7	0	0	0	0	0	0	0	0	0	0	0
d__Bacteria	k__norank_d__Bacteria	p__Bacteroidota	c__Bacteroidia	o__Sphingobacteriales	f__Lentimicrobiaceae	g__Lentimicrobium	s__denitrifying_bacterium_enrichment_culture_clone_NOB_2_E8	ASV2413	141	0.000159525	0	0	130	0	0	0	9	0	0	0	0	2	0	0	0	0
d__Bacteria	k__norank_d__Bacteria	p__Bacteroidota	c__Bacteroidia	o__Bacteroidales	f__Tannerellaceae	g__Parabacteroides	s__unclassified_g__Parabacteroides	ASV378	137	0.000155	0	0	0	0	26	59	37	7	0	0	5	0	3	0	0	0
d__Bacteria	k__norank_d__Bacteria	p__Bacteroidota	c__Bacteroidia	o__Bacteroidales	f__Bacteroidaceae	g__Bacteroides	s__unclassified_g__Bacteroides	ASV280	140	0.000158394	0	0	0	0	26	50	42	0	0	0	0	0	6	3	13	0
d__Bacteria	k__norank_d__Bacteria	p__Firmicutes	c__Bacilli	o__Bacillales	f__Planococcaceae	g__Lysinibacillus	s__unclassified_g__Lysinibacillus	ASV2052	128	0.000144817	128	0	0	0	0	0	0	0	0	0	0	0	0	0	0	0
d__Bacteria	k__norank_d__Bacteria	p__Actinobacteriota	c__Actinobacteria	o__Propionibacteriales	f__Nocardioidaceae	g__Nocardioides	s__unclassified_g__Nocardioides	ASV2068	128	0.000144817	106	14	0	0	0	0	0	8	0	0	0	0	0	0	0	0
d__Bacteria	k__norank_d__Bacteria	p__Firmicutes	c__Clostridia	o__Lachnospirales	f__Lachnospiraceae	g__Dorea	s__unclassified_g__Dorea	ASV1029	129	0.000145949	0	0	46	0	0	44	0	35	2	2	0	0	0	0	0	0
d__Bacteria	k__norank_d__Bacteria	p__Actinobacteriota	c__Actinobacteria	o__Micrococcales	f__Dermabacteraceae	g__Brachybacterium	s__unclassified_g__Brachybacterium	ASV2058	123	0.00013916	115	0	0	0	0	0	7	0	0	0	0	0	1	0	0	0
d__Bacteria	k__norank_d__Bacteria	p__Proteobacteria	c__Alphaproteobacteria	o__Caulobacterales	f__Caulobacteraceae	g__Brevundimonas	s__unclassified_g__Brevundimonas	ASV2054	131	0.000148212	131	0	0	0	0	0	0	0	0	0	0	0	0	0	0	0
d__Bacteria	k__norank_d__Bacteria	p__Proteobacteria	c__Gammaproteobacteria	o__Gammaproteobacteria_Incertae_Sedis	f__unclassified_o__Gammaproteobacteria_Incertae_Sedis	g__Acidibacter	s__uncultured_bacterium_g__Acidibacter	ASV3443	137	0.000155	0	137	0	0	0	0	0	0	0	0	0	0	0	0	0	0
d__Bacteria	k__norank_d__Bacteria	p__Bacteroidota	c__Bacteroidia	o__Bacteroidales	f__Rikenellaceae	g__Alistipes	s__unclassified_g__Alistipes	ASV2412	128	0.000144817	0	0	128	0	0	0	0	0	0	0	0	0	0	0	0	0
d__Bacteria	k__norank_d__Bacteria	p__Spirochaetota	c__Spirochaetia	o__Spirochaetales	f__Spirochaetaceae	g__Treponema	s__unclassified_g__Treponema	ASV2411	136	0.000153868	0	0	136	0	0	0	0	0	0	0	0	0	0	0	0	0
d__Bacteria	k__norank_d__Bacteria	p__Bacteroidota	c__Bacteroidia	o__Bacteroidales	f__Prevotellaceae	g__unclassified_f__Prevotellaceae	s__unclassified_f__Prevotellaceae	ASV1587	134	0.000151606	0	0	0	134	0	0	0	0	0	0	0	0	0	0	0	0
d__Bacteria	k__norank_d__Bacteria	p__Proteobacteria	c__Gammaproteobacteria	o__Burkholderiales	f__Comamonadaceae	g__unclassified_f__Comamonadaceae	s__unclassified_f__Comamonadaceae	ASV1401	136	0.000153868	0	0	29	104	0	3	0	0	0	0	0	0	0	0	0	0
d__Bacteria	k__norank_d__Bacteria	p__Firmicutes	c__Clostridia	o__Oscillospirales	f__Ruminococcaceae	g__Faecalibacterium	s__unclassified_g__Faecalibacterium	ASV338	132	0.000149343	0	0	0	0	63	44	0	12	0	0	0	0	0	0	13	0
d__Bacteria	k__norank_d__Bacteria	p__Firmicutes	c__Clostridia	o__Clostridiales	f__Clostridiaceae	g__Clostridium_sensu_stricto_8	s__uncultured_bacterium_g__Clostridium_sensu_stricto_8	ASV2056	129	0.000145949	129	0	0	0	0	0	0	0	0	0	0	0	0	0	0	0
d__Bacteria	k__norank_d__Bacteria	p__Actinobacteriota	c__Actinobacteria	o__Micrococcales	f__Intrasporangiaceae	g__unclassified_f__Intrasporangiaceae	s__unclassified_f__Intrasporangiaceae	ASV395	150	0.000169708	0	0	0	0	23	0	0	0	0	127	0	0	0	0	0	0
d__Bacteria	k__norank_d__Bacteria	p__Deinococcota	c__Deinococci	o__Deinococcales	f__Trueperaceae	g__Truepera	s__uncultured_bacterium_g__Truepera	ASV138	125	0.000141423	0	0	0	0	0	0	0	121	0	0	0	0	0	4	0	0
d__Bacteria	k__norank_d__Bacteria	p__Firmicutes	c__Clostridia	o__Christensenellales	f__Christensenellaceae	g__Christensenellaceae_R-7_group	s__uncultured_Lachnospiraceae_bacterium_g__Christensenellaceae_R-7_group	ASV2188	134	0.000151606	39	0	82	0	0	0	13	0	0	0	0	0	0	0	0	0
d__Bacteria	k__norank_d__Bacteria	p__Actinobacteriota	c__Actinobacteria	o__Frankiales	f__Acidothermaceae	g__Acidothermus	s__uncultured_bacterium_g__Acidothermus	ASV3444	128	0.000144817	0	128	0	0	0	0	0	0	0	0	0	0	0	0	0	0
d__Bacteria	k__norank_d__Bacteria	p__Proteobacteria	c__Gammaproteobacteria	o__Burkholderiales	f__Gallionellaceae	g__Candidatus_Nitrotoga	s__unclassified_g__Candidatus_Nitrotoga	ASV1690	136	0.000153868	0	0	42	70	0	0	14	0	0	0	0	10	0	0	0	0
d__Bacteria	k__norank_d__Bacteria	p__Firmicutes	c__Clostridia	o__Oscillospirales	f__Ruminococcaceae	g__Faecalibacterium	s__unclassified_g__Faecalibacterium	ASV10	131	0.000148212	0	0	0	0	0	0	51	0	0	9	5	0	0	48	18	0
d__Bacteria	k__norank_d__Bacteria	p__Actinobacteriota	c__Thermoleophilia	o__Solirubrobacterales	f__Solirubrobacteraceae	g__Conexibacter	s__unclassified_g__Conexibacter	ASV3445	121	0.000136898	0	121	0	0	0	0	0	0	0	0	0	0	0	0	0	0
d__Bacteria	k__norank_d__Bacteria	p__Firmicutes	c__Clostridia	o__Lachnospirales	f__Lachnospiraceae	g__Ruminococcus_torques_group	s__unclassified_g__Ruminococcus_torques_group	ASV111	136	0.000153868	0	0	31	0	12	29	33	5	0	0	0	0	2	7	17	0
d__Bacteria	k__norank_d__Bacteria	p__Firmicutes	c__Clostridia	o__Oscillospirales	f__Ruminococcaceae	g__Subdoligranulum	s__unclassified_g__Subdoligranulum	ASV339	135	0.000152737	0	0	0	0	63	38	27	0	7	0	0	0	0	0	0	0
d__Bacteria	k__norank_d__Bacteria	p__Proteobacteria	c__Gammaproteobacteria	o__Burkholderiales	f__Rhodocyclaceae	g__Denitratisoma	s__unclassified_g__Denitratisoma	ASV1661	131	0.000148212	0	14	45	72	0	0	0	0	0	0	0	0	0	0	0	0
d__Bacteria	k__norank_d__Bacteria	p__MBNT15	c__norank_p__MBNT15	o__norank_c__norank_p__MBNT15	f__norank_o__norank_c__norank_p__MBNT15	g__norank_f__norank_o__norank_c__norank_p__MBNT15	s__unclassified_g__norank_f__norank_o__norank_c__norank_p__MBNT15	ASV2089	119	0.000134635	91	0	0	0	0	0	0	0	0	0	0	0	0	0	0	28
d__Bacteria	k__norank_d__Bacteria	p__Bacteroidota	c__Bacteroidia	o__Bacteroidales	f__Marinilabiliaceae	g__Cytophaga_xylanolytica_group	s__uncultured_bacterium_g__Cytophaga_xylanolytica_group	ASV1826	129	0.000145949	0	0	87	40	0	0	0	0	0	0	0	0	2	0	0	0
d__Bacteria	k__norank_d__Bacteria	p__Proteobacteria	c__Alphaproteobacteria	o__Rhizobiales	f__Beijerinckiaceae	g__Bosea	s__unclassified_g__Bosea	ASV2692	142	0.000160657	0	4	27	0	0	0	0	0	0	111	0	0	0	0	0	0
d__Bacteria	k__norank_d__Bacteria	p__Actinobacteriota	c__Actinobacteria	o__Corynebacteriales	f__Nocardiaceae	g__Rhodococcus	s__unclassified_g__Rhodococcus	ASV257	128	0.000144817	0	0	0	58	11	3	14	14	0	0	7	8	7	3	3	0
d__Bacteria	k__norank_d__Bacteria	p__Proteobacteria	c__Gammaproteobacteria	o__Enterobacterales	f__unclassified_o__Enterobacterales	g__unclassified_o__Enterobacterales	s__unclassified_o__Enterobacterales	ASV2059	113	0.000127847	113	0	0	0	0	0	0	0	0	0	0	0	0	0	0	0
d__Bacteria	k__norank_d__Bacteria	p__Actinobacteriota	c__Actinobacteria	o__Corynebacteriales	f__Mycobacteriaceae	g__Mycobacterium	s__unclassified_g__Mycobacterium	ASV3446	133	0.000150474	0	133	0	0	0	0	0	0	0	0	0	0	0	0	0	0
d__Bacteria	k__norank_d__Bacteria	p__Firmicutes	c__Clostridia	o__Christensenellales	f__Christensenellaceae	g__Christensenellaceae_R-7_group	s__unclassified_g__Christensenellaceae_R-7_group	ASV346	122	0.000138029	0	0	0	0	46	23	33	18	0	0	0	0	2	0	0	0
d__Bacteria	k__norank_d__Bacteria	p__Firmicutes	c__Bacilli	o__Paenibacillales	f__Paenibacillaceae	g__Paenibacillus	s__unclassified_g__Paenibacillus	ASV1590	131	0.000148212	0	0	0	131	0	0	0	0	0	0	0	0	0	0	0	0
d__Bacteria	k__norank_d__Bacteria	p__Actinobacteriota	c__Actinobacteria	o__Corynebacteriales	f__Corynebacteriaceae	g__Corynebacterium	s__unclassified_g__Corynebacterium	ASV2077	118	0.000133503	97	0	0	0	0	0	21	0	0	0	0	0	0	0	0	0
d__Bacteria	k__norank_d__Bacteria	p__Spirochaetota	c__Spirochaetia	o__Spirochaetales	f__Spirochaetaceae	g__Treponema	s__unclassified_g__Treponema	ASV2060	123	0.00013916	123	0	0	0	0	0	0	0	0	0	0	0	0	0	0	0
d__Bacteria	k__norank_d__Bacteria	p__Proteobacteria	c__Gammaproteobacteria	o__Competibacterales	f__Competibacteraceae	g__Candidatus_Competibacter	s__uncultured_bacterium_g__Candidatus_Competibacter	ASV2929	122	0.000138029	0	0	0	0	0	0	49	65	0	0	0	8	0	0	0	0
d__Bacteria	k__norank_d__Bacteria	p__Bacteroidota	c__Bacteroidia	o__Bacteroidales	f__Rikenellaceae	g__Alistipes	s__unclassified_g__Alistipes	ASV29	121	0.000136898	0	0	0	0	72	0	0	10	0	0	0	17	0	22	0	0
d__Bacteria	k__norank_d__Bacteria	p__Proteobacteria	c__Gammaproteobacteria	o__Burkholderiales	f__Comamonadaceae	g__unclassified_f__Comamonadaceae	s__unclassified_f__Comamonadaceae	ASV1619	134	0.000151606	0	39	0	95	0	0	0	0	0	0	0	0	0	0	0	0
d__Bacteria	k__norank_d__Bacteria	p__Acidobacteriota	c__Acidobacteriae	o__Subgroup_2	f__norank_o__Subgroup_2	g__norank_f__norank_o__Subgroup_2	s__uncultured_forest_soil_bacterium_g__norank_f__norank_o__Subgroup_2	ASV3447	128	0.000144817	0	128	0	0	0	0	0	0	0	0	0	0	0	0	0	0
d__Bacteria	k__norank_d__Bacteria	p__Firmicutes	c__Clostridia	o__Oscillospirales	f__Oscillospiraceae	g__UCG-002	s__unclassified_g__UCG-002	ASV61	114	0.000128978	40	0	0	0	27	7	17	5	0	0	0	0	0	9	9	0
d__Bacteria	k__norank_d__Bacteria	p__Actinobacteriota	c__Actinobacteria	o__Micrococcales	f__Sanguibacteraceae	g__Sanguibacter	s__unclassified_g__Sanguibacter	ASV1733	126	0.000142555	0	22	48	56	0	0	0	0	0	0	0	0	0	0	0	0
d__Bacteria	k__norank_d__Bacteria	p__Actinobacteriota	c__Coriobacteriia	o__OPB41	f__norank_o__OPB41	g__norank_f__norank_o__OPB41	s__unclassified_g__norank_f__norank_o__OPB41	ASV2061	116	0.000131241	116	0	0	0	0	0	0	0	0	0	0	0	0	0	0	0
d__Bacteria	k__norank_d__Bacteria	p__Bacteroidota	c__Bacteroidia	o__Flavobacteriales	f__Flavobacteriaceae	g__Flavobacterium	s__unclassified_g__Flavobacterium	ASV2414	119	0.000134635	0	0	119	0	0	0	0	0	0	0	0	0	0	0	0	0
d__Bacteria	k__norank_d__Bacteria	p__Firmicutes	c__Clostridia	o__Lachnospirales	f__Lachnospiraceae	g__unclassified_f__Lachnospiraceae	s__unclassified_f__Lachnospiraceae	ASV2062	111	0.000125584	111	0	0	0	0	0	0	0	0	0	0	0	0	0	0	0
d__Bacteria	k__norank_d__Bacteria	p__Proteobacteria	c__Gammaproteobacteria	o__Enterobacterales	f__Erwiniaceae	g__Pantoea	s__unclassified_g__Pantoea	ASV2069	121	0.000136898	112	0	0	0	0	0	0	0	0	0	3	6	0	0	0	0
d__Bacteria	k__norank_d__Bacteria	p__Actinobacteriota	c__Actinobacteria	o__Micromonosporales	f__Micromonosporaceae	g__unclassified_f__Micromonosporaceae	s__unclassified_f__Micromonosporaceae	ASV3448	126	0.000142555	0	126	0	0	0	0	0	0	0	0	0	0	0	0	0	0
d__Bacteria	k__norank_d__Bacteria	p__Proteobacteria	c__Gammaproteobacteria	o__Burkholderiales	f__Oxalobacteraceae	g__Massilia	s__unclassified_g__Massilia	ASV1593	126	0.000142555	0	0	0	126	0	0	0	0	0	0	0	0	0	0	0	0
d__Bacteria	k__norank_d__Bacteria	p__Proteobacteria	c__Alphaproteobacteria	o__Sphingomonadales	f__Sphingomonadaceae	g__Novosphingobium	s__unclassified_g__Novosphingobium	ASV872	113	0.000127847	87	0	0	0	3	19	0	2	0	0	0	0	0	0	2	0
d__Bacteria	k__norank_d__Bacteria	p__Bacteroidota	c__Bacteroidia	o__Bacteroidales	f__Bacteroidaceae	g__Bacteroides	s__Bacteroides_massiliensis	ASV43	125	0.000141423	0	0	0	0	0	0	100	0	0	3	9	0	0	13	0	0
d__Bacteria	k__norank_d__Bacteria	p__Firmicutes	c__Clostridia	o__Oscillospirales	f__Ruminococcaceae	g__Ruminococcus	s__Ruminococcus_bicirculans	ASV18	111	0.000125584	0	0	0	0	23	4	20	3	2	0	5	7	0	30	17	0
d__Bacteria	k__norank_d__Bacteria	p__Proteobacteria	c__Alphaproteobacteria	o__Sphingomonadales	f__Sphingomonadaceae	g__Sphingomonas	s__unclassified_g__Sphingomonas	ASV2071	127	0.000143686	119	0	0	0	0	0	0	8	0	0	0	0	0	0	0	0
d__Bacteria	k__norank_d__Bacteria	p__Firmicutes	c__Clostridia	o__Clostridiales	f__Clostridiaceae	g__Clostridium_sensu_stricto_8	s__uncultured_bacterium_g__Clostridium_sensu_stricto_8	ASV1595	122	0.000138029	0	0	0	122	0	0	0	0	0	0	0	0	0	0	0	0
d__Bacteria	k__norank_d__Bacteria	p__Bacteroidota	c__Bacteroidia	o__Bacteroidales	f__Paludibacteraceae	g__Paludibacter	s__Paludibacter_jiangxiensis	ASV2415	125	0.000141423	0	0	125	0	0	0	0	0	0	0	0	0	0	0	0	0
d__Bacteria	k__norank_d__Bacteria	p__Bacteroidota	c__Bacteroidia	o__Flavobacteriales	f__Flavobacteriaceae	g__Flavobacterium	s__unclassified_g__Flavobacterium	ASV1620	110	0.000124452	0	0	25	85	0	0	0	0	0	0	0	0	0	0	0	0
d__Bacteria	k__norank_d__Bacteria	p__Actinobacteriota	c__Actinobacteria	o__Corynebacteriales	f__Dietziaceae	g__Dietzia	s__unclassified_g__Dietzia	ASV1602	115	0.000130109	0	0	0	106	0	0	0	0	0	0	0	9	0	0	0	0
d__Bacteria	k__norank_d__Bacteria	p__Actinobacteriota	c__Actinobacteria	o__Corynebacteriales	f__Corynebacteriaceae	g__Corynebacterium	s__unclassified_g__Corynebacterium	ASV533	121	0.000136898	0	0	0	113	8	0	0	0	0	0	0	0	0	0	0	0
d__Bacteria	k__norank_d__Bacteria	p__Firmicutes	c__Bacilli	o__Lactobacillales	f__Streptococcaceae	g__Streptococcus	s__unclassified_g__Streptococcus	ASV2064	104	0.000117664	104	0	0	0	0	0	0	0	0	0	0	0	0	0	0	0
d__Bacteria	k__norank_d__Bacteria	p__Proteobacteria	c__Alphaproteobacteria	o__unclassified_c__Alphaproteobacteria	f__unclassified_c__Alphaproteobacteria	g__unclassified_c__Alphaproteobacteria	s__unclassified_c__Alphaproteobacteria	ASV2086	117	0.000132372	99	18	0	0	0	0	0	0	0	0	0	0	0	0	0	0
d__Bacteria	k__norank_d__Bacteria	p__Firmicutes	c__Clostridia	o__Clostridiales	f__Clostridiaceae	g__Clostridium_sensu_stricto_1	s__unclassified_g__Clostridium_sensu_stricto_1	ASV2416	123	0.00013916	0	0	119	0	0	0	0	0	0	0	0	0	4	0	0	0
d__Bacteria	k__norank_d__Bacteria	p__Proteobacteria	c__Gammaproteobacteria	o__Beggiatoales	f__Beggiatoaceae	g__Beggiatoa	s__Beggiatoa_sp._1401-13	ASV748	124	0.000140292	0	16	48	39	4	2	15	0	0	0	0	0	0	0	0	0
d__Bacteria	k__norank_d__Bacteria	p__Proteobacteria	c__Alphaproteobacteria	o__Sphingomonadales	f__Sphingomonadaceae	g__Sphingopyxis	s__unclassified_g__Sphingopyxis	ASV1695	117	0.000132372	51	0	0	66	0	0	0	0	0	0	0	0	0	0	0	0
d__Bacteria	k__norank_d__Bacteria	p__Proteobacteria	c__Gammaproteobacteria	o__Burkholderiales	f__Comamonadaceae	g__Comamonas	s__Comamonas_denitrificans	ASV1790	113	0.000127847	68	0	0	39	0	0	0	6	0	0	0	0	0	0	0	0
d__Bacteria	k__norank_d__Bacteria	p__Actinobacteriota	c__Actinobacteria	o__Frankiales	f__Acidothermaceae	g__Acidothermus	s__unclassified_g__Acidothermus	ASV3449	120	0.000135766	0	120	0	0	0	0	0	0	0	0	0	0	0	0	0	0
d__Bacteria	k__norank_d__Bacteria	p__Proteobacteria	c__Alphaproteobacteria	o__Sphingomonadales	f__Sphingomonadaceae	g__Sphingomonas	s__unclassified_g__Sphingomonas	ASV4720	123	0.00013916	0	0	0	0	0	0	0	123	0	0	0	0	0	0	0	0
d__Bacteria	k__norank_d__Bacteria	p__Acidobacteriota	c__Acidobacteriae	o__Subgroup_2	f__norank_o__Subgroup_2	g__norank_f__norank_o__Subgroup_2	s__unclassified_g__norank_f__norank_o__Subgroup_2	ASV3450	115	0.000130109	0	115	0	0	0	0	0	0	0	0	0	0	0	0	0	0
d__Bacteria	k__norank_d__Bacteria	p__Bacteroidota	c__Bacteroidia	o__Bacteroidales	f__Bacteroidaceae	g__Bacteroides	s__unclassified_g__Bacteroides	ASV359	117	0.000132372	0	0	0	0	37	64	5	11	0	0	0	0	0	0	0	0
d__Bacteria	k__norank_d__Bacteria	p__Proteobacteria	c__Alphaproteobacteria	o__Sphingomonadales	f__Sphingomonadaceae	g__Sphingomonas	s__unclassified_g__Sphingomonas	ASV2065	111	0.000125584	111	0	0	0	0	0	0	0	0	0	0	0	0	0	0	0
d__Bacteria	k__norank_d__Bacteria	p__Proteobacteria	c__Gammaproteobacteria	o__Gammaproteobacteria_Incertae_Sedis	f__unclassified_o__Gammaproteobacteria_Incertae_Sedis	g__Acidibacter	s__uncultured_bacterium_g__Acidibacter	ASV3451	116	0.000131241	0	116	0	0	0	0	0	0	0	0	0	0	0	0	0	0
d__Bacteria	k__norank_d__Bacteria	p__Bacteroidota	c__Bacteroidia	o__Bacteroidales	f__Prolixibacteraceae	g__WCHB1-32	s__unclassified_g__WCHB1-32	ASV1634	118	0.000133503	0	0	34	84	0	0	0	0	0	0	0	0	0	0	0	0
d__Bacteria	k__norank_d__Bacteria	p__Actinobacteriota	c__Actinobacteria	o__Frankiales	f__norank_o__Frankiales	g__norank_f__norank_o__Frankiales	s__unclassified_g__norank_f__norank_o__Frankiales	ASV2067	103	0.000116533	103	0	0	0	0	0	0	0	0	0	0	0	0	0	0	0
d__Bacteria	k__norank_d__Bacteria	p__Actinobacteriota	c__Thermoleophilia	o__Solirubrobacterales	f__Solirubrobacteraceae	g__norank_f__Solirubrobacteraceae	s__unclassified_g__norank_f__Solirubrobacteraceae	ASV3452	117	0.000132372	0	117	0	0	0	0	0	0	0	0	0	0	0	0	0	0
d__Bacteria	k__norank_d__Bacteria	p__Actinobacteriota	c__Thermoleophilia	o__Solirubrobacterales	f__Solirubrobacteraceae	g__norank_f__Solirubrobacteraceae	s__uncultured_Conexibacteraceae_bacterium_g__norank_f__Solirubrobacteraceae	ASV3453	122	0.000138029	0	122	0	0	0	0	0	0	0	0	0	0	0	0	0	0
d__Bacteria	k__norank_d__Bacteria	p__Firmicutes	c__Clostridia	o__Lachnospirales	f__Lachnospiraceae	g__Blautia	s__unclassified_g__Blautia	ASV447	107	0.000121058	93	0	0	0	14	0	0	0	0	0	0	0	0	0	0	0
d__Bacteria	k__norank_d__Bacteria	p__Acidobacteriota	c__Acidobacteriae	o__Acidobacteriales	f__norank_o__Acidobacteriales	g__norank_f__norank_o__Acidobacteriales	s__uncultured_forest_soil_bacterium_g__norank_f__norank_o__Acidobacteriales	ASV3454	120	0.000135766	0	120	0	0	0	0	0	0	0	0	0	0	0	0	0	0
d__Bacteria	k__norank_d__Bacteria	p__Bacteroidota	c__Bacteroidia	o__Flavobacteriales	f__Weeksellaceae	g__Chryseobacterium	s__unclassified_g__Chryseobacterium	ASV4721	107	0.000121058	0	0	0	0	0	0	0	107	0	0	0	0	0	0	0	0
d__Bacteria	k__norank_d__Bacteria	p__Bacteroidota	c__Bacteroidia	o__Bacteroidales	f__Bacteroidaceae	g__Bacteroides	s__unclassified_g__Bacteroides	ASV344	113	0.000127847	0	0	65	0	48	0	0	0	0	0	0	0	0	0	0	0
d__Bacteria	k__norank_d__Bacteria	p__Proteobacteria	c__Alphaproteobacteria	o__Micropepsales	f__Micropepsaceae	g__norank_f__Micropepsaceae	s__uncultured_bacterium_g__norank_f__Micropepsaceae	ASV3455	116	0.000131241	0	116	0	0	0	0	0	0	0	0	0	0	0	0	0	0
d__Bacteria	k__norank_d__Bacteria	p__Proteobacteria	c__Gammaproteobacteria	o__Burkholderiales	f__Comamonadaceae	g__Simplicispira	s__unclassified_g__Simplicispira	ASV2430	117	0.000132372	0	0	88	0	0	0	22	7	0	0	0	0	0	0	0	0
d__Bacteria	k__norank_d__Bacteria	p__Firmicutes	c__Bacilli	o__Bacillales	f__Bacillaceae	g__Gracilibacillus	s__unclassified_g__Gracilibacillus	ASV2070	107	0.000121058	107	0	0	0	0	0	0	0	0	0	0	0	0	0	0	0
d__Bacteria	k__norank_d__Bacteria	p__Proteobacteria	c__Alphaproteobacteria	o__Sphingomonadales	f__Sphingomonadaceae	g__Sphingopyxis	s__unclassified_g__Sphingopyxis	ASV3291	129	0.000145949	0	0	0	0	0	0	0	0	0	129	0	0	0	0	0	0
d__Bacteria	k__norank_d__Bacteria	p__Acidobacteriota	c__Acidobacteriae	o__Acidobacteriales	f__Acidobacteriaceae_Subgroup_1	g__Edaphobacter	s__Acidobacteria_bacterium_AB39	ASV3456	111	0.000125584	0	111	0	0	0	0	0	0	0	0	0	0	0	0	0	0
d__Bacteria	k__norank_d__Bacteria	p__Proteobacteria	c__Alphaproteobacteria	o__Rhizobiales	f__Beijerinckiaceae	g__Methylobacterium-Methylorubrum	s__unclassified_g__Methylobacterium-Methylorubrum	ASV440	113	0.000127847	0	0	0	47	15	0	0	0	0	0	0	0	0	0	51	0
d__Bacteria	k__norank_d__Bacteria	p__Actinobacteriota	c__Actinobacteria	o__Frankiales	f__Acidothermaceae	g__Acidothermus	s__unclassified_g__Acidothermus	ASV3458	117	0.000132372	0	117	0	0	0	0	0	0	0	0	0	0	0	0	0	0
d__Bacteria	k__norank_d__Bacteria	p__Proteobacteria	c__Gammaproteobacteria	o__Burkholderiales	f__Oxalobacteraceae	g__Massilia	s__unclassified_g__Massilia	ASV1681	118	0.000133503	0	48	0	70	0	0	0	0	0	0	0	0	0	0	0	0
d__Bacteria	k__norank_d__Bacteria	p__Firmicutes	c__Bacilli	o__Staphylococcales	f__Staphylococcaceae	g__Staphylococcus	s__unclassified_g__Staphylococcus	ASV1599	113	0.000127847	0	0	0	113	0	0	0	0	0	0	0	0	0	0	0	0
d__Bacteria	k__norank_d__Bacteria	p__Actinobacteriota	c__Actinobacteria	o__Frankiales	f__Geodermatophilaceae	g__Geodermatophilus	s__unclassified_g__Geodermatophilus	ASV3457	119	0.000134635	0	119	0	0	0	0	0	0	0	0	0	0	0	0	0	0
d__Bacteria	k__norank_d__Bacteria	p__Proteobacteria	c__Gammaproteobacteria	o__Burkholderiales	f__Comamonadaceae	g__unclassified_f__Comamonadaceae	s__unclassified_f__Comamonadaceae	ASV33	95	0.000107482	76	0	0	0	0	0	0	0	0	0	0	0	0	19	0	0
d__Bacteria	k__norank_d__Bacteria	p__Proteobacteria	c__Alphaproteobacteria	o__Rhizobiales	f__Beijerinckiaceae	g__Methylobacterium-Methylorubrum	s__unclassified_g__Methylobacterium-Methylorubrum	ASV1870	104	0.000117664	47	0	9	29	0	0	0	19	0	0	0	0	0	0	0	0
d__Bacteria	k__norank_d__Bacteria	p__Actinobacteriota	c__Thermoleophilia	o__Solirubrobacterales	f__Solirubrobacteraceae	g__Conexibacter	s__unclassified_g__Conexibacter	ASV3459	111	0.000125584	0	111	0	0	0	0	0	0	0	0	0	0	0	0	0	0
d__Bacteria	k__norank_d__Bacteria	p__Firmicutes	c__Clostridia	o__Oscillospirales	f__Ruminococcaceae	g__Ruminococcus	s__unclassified_g__Ruminococcus	ASV2110	107	0.000121058	81	0	0	0	0	0	18	8	0	0	0	0	0	0	0	0
d__Bacteria	k__norank_d__Bacteria	p__Firmicutes	c__Bacilli	o__Exiguobacterales	f__Exiguobacteraceae	g__Exiguobacterium	s__unclassified_g__Exiguobacterium	ASV2072	100	0.000113139	100	0	0	0	0	0	0	0	0	0	0	0	0	0	0	0
d__Bacteria	k__norank_d__Bacteria	p__Actinobacteriota	c__Actinobacteria	o__Micrococcales	f__Cellulomonadaceae	g__Cellulomonas	s__unclassified_g__Cellulomonas	ASV1658	113	0.000127847	0	0	33	75	0	0	5	0	0	0	0	0	0	0	0	0
d__Bacteria	k__norank_d__Bacteria	p__Proteobacteria	c__Gammaproteobacteria	o__JG36-TzT-191	f__norank_o__JG36-TzT-191	g__norank_f__norank_o__JG36-TzT-191	s__unclassified_g__norank_f__norank_o__JG36-TzT-191	ASV2073	105	0.000118795	105	0	0	0	0	0	0	0	0	0	0	0	0	0	0	0
d__Bacteria	k__norank_d__Bacteria	p__Actinobacteriota	c__Actinobacteria	o__Frankiales	f__Acidothermaceae	g__Acidothermus	s__unclassified_g__Acidothermus	ASV3460	110	0.000124452	0	110	0	0	0	0	0	0	0	0	0	0	0	0	0	0
d__Bacteria	k__norank_d__Bacteria	p__RCP2-54	c__norank_p__RCP2-54	o__norank_c__norank_p__RCP2-54	f__norank_o__norank_c__norank_p__RCP2-54	g__norank_f__norank_o__norank_c__norank_p__RCP2-54	s__uncultured_bacterium_g__norank_f__norank_o__norank_c__norank_p__RCP2-54	ASV1506	113	0.000127847	0	111	0	0	0	2	0	0	0	0	0	0	0	0	0	0
d__Bacteria	k__norank_d__Bacteria	p__Bacteroidota	c__Bacteroidia	o__Bacteroidales	f__FTLpost3	g__norank_f__FTLpost3	s__uncultured_bacterium_g__norank_f__FTLpost3	ASV2417	107	0.000121058	0	0	107	0	0	0	0	0	0	0	0	0	0	0	0	0
d__Bacteria	k__norank_d__Bacteria	p__Bacteroidota	c__Bacteroidia	o__Bacteroidales	f__Prevotellaceae	g__Prevotella	s__unclassified_g__Prevotella	ASV1031	109	0.000123321	0	0	0	0	0	40	54	0	0	0	0	15	0	0	0	0
d__Bacteria	k__norank_d__Bacteria	p__Actinobacteriota	c__Actinobacteria	o__Actinomycetales	f__Actinomycetaceae	g__norank_f__Actinomycetaceae	s__metagenome_g__norank_f__Actinomycetaceae	ASV2431	110	0.000124452	0	0	81	0	0	0	29	0	0	0	0	0	0	0	0	0
d__Bacteria	k__norank_d__Bacteria	p__unclassified_k__norank_d__Bacteria	c__unclassified_k__norank_d__Bacteria	o__unclassified_k__norank_d__Bacteria	f__unclassified_k__norank_d__Bacteria	g__unclassified_k__norank_d__Bacteria	s__unclassified_k__norank_d__Bacteria	ASV2418	108	0.00012219	0	0	108	0	0	0	0	0	0	0	0	0	0	0	0	0
d__Bacteria	k__norank_d__Bacteria	p__Actinobacteriota	c__Actinobacteria	o__Micrococcales	f__Intrasporangiaceae	g__Tetrasphaera	s__unclassified_g__Tetrasphaera	ASV1601	104	0.000117664	0	0	0	104	0	0	0	0	0	0	0	0	0	0	0	0
d__Bacteria	k__norank_d__Bacteria	p__Actinobacteriota	c__Actinobacteria	o__Propionibacteriales	f__Nocardioidaceae	g__Nocardioides	s__unclassified_g__Nocardioides	ASV2074	103	0.000116533	103	0	0	0	0	0	0	0	0	0	0	0	0	0	0	0
d__Bacteria	k__norank_d__Bacteria	p__Acidobacteriota	c__Acidobacteriae	o__Bryobacterales	f__Bryobacteraceae	g__Bryobacter	s__unclassified_g__Bryobacter	ASV3461	108	0.00012219	0	108	0	0	0	0	0	0	0	0	0	0	0	0	0	0
d__Bacteria	k__norank_d__Bacteria	p__Proteobacteria	c__Alphaproteobacteria	o__Rhizobiales	f__Beijerinckiaceae	g__unclassified_f__Beijerinckiaceae	s__unclassified_f__Beijerinckiaceae	ASV3462	106	0.000119927	0	106	0	0	0	0	0	0	0	0	0	0	0	0	0	0
d__Bacteria	k__norank_d__Bacteria	p__Actinobacteriota	c__Actinobacteria	o__Micrococcales	f__Microbacteriaceae	g__Leucobacter	s__unclassified_g__Leucobacter	ASV1604	110	0.000124452	0	0	0	110	0	0	0	0	0	0	0	0	0	0	0	0
d__Bacteria	k__norank_d__Bacteria	p__Proteobacteria	c__Gammaproteobacteria	o__Burkholderiales	f__Nitrosomonadaceae	g__Ellin6067	s__uncultured_soil_bacterium_g__Ellin6067	ASV2079	96	0.000108613	92	0	0	0	0	0	0	0	0	0	4	0	0	0	0	0
d__Bacteria	k__norank_d__Bacteria	p__Actinobacteriota	c__Actinobacteria	o__Catenulisporales	f__Actinospicaceae	g__Actinospica	s__unclassified_g__Actinospica	ASV3463	115	0.000130109	0	115	0	0	0	0	0	0	0	0	0	0	0	0	0	0
d__Bacteria	k__norank_d__Bacteria	p__Acidobacteriota	c__Acidobacteriae	o__Subgroup_2	f__norank_o__Subgroup_2	g__norank_f__norank_o__Subgroup_2	s__uncultured_Holophaga_sp._g__norank_f__norank_o__Subgroup_2	ASV3464	107	0.000121058	0	107	0	0	0	0	0	0	0	0	0	0	0	0	0	0
d__Bacteria	k__norank_d__Bacteria	p__unclassified_k__norank_d__Bacteria	c__unclassified_k__norank_d__Bacteria	o__unclassified_k__norank_d__Bacteria	f__unclassified_k__norank_d__Bacteria	g__unclassified_k__norank_d__Bacteria	s__unclassified_k__norank_d__Bacteria	ASV2923	112	0.000126715	0	0	0	0	0	0	88	0	0	0	0	0	0	0	24	0
d__Bacteria	k__norank_d__Bacteria	p__Proteobacteria	c__Gammaproteobacteria	o__Gammaproteobacteria_Incertae_Sedis	f__unclassified_o__Gammaproteobacteria_Incertae_Sedis	g__Acidibacter	s__unclassified_g__Acidibacter	ASV2419	103	0.000116533	0	0	103	0	0	0	0	0	0	0	0	0	0	0	0	0
d__Bacteria	k__norank_d__Bacteria	p__Actinobacteriota	c__Actinobacteria	o__Pseudonocardiales	f__Pseudonocardiaceae	g__Crossiella	s__uncultured_bacterium_g__Crossiella	ASV3465	107	0.000121058	0	107	0	0	0	0	0	0	0	0	0	0	0	0	0	0
d__Bacteria	k__norank_d__Bacteria	p__Nitrospirota	c__Nitrospiria	o__Nitrospirales	f__Nitrospiraceae	g__Nitrospira	s__unclassified_g__Nitrospira	ASV2075	104	0.000117664	104	0	0	0	0	0	0	0	0	0	0	0	0	0	0	0
d__Bacteria	k__norank_d__Bacteria	p__Acidobacteriota	c__Acidobacteriae	o__Acidobacteriales	f__norank_o__Acidobacteriales	g__norank_f__norank_o__Acidobacteriales	s__unclassified_g__norank_f__norank_o__Acidobacteriales	ASV3466	105	0.000118795	0	105	0	0	0	0	0	0	0	0	0	0	0	0	0	0
d__Bacteria	k__norank_d__Bacteria	p__Actinobacteriota	c__Actinobacteria	o__Propionibacteriales	f__Nocardioidaceae	g__Marmoricola	s__unclassified_g__Marmoricola	ASV2078	93	0.000105219	92	0	0	0	0	0	0	0	0	0	0	0	0	0	0	1
d__Bacteria	k__norank_d__Bacteria	p__Bacteroidota	c__Bacteroidia	o__Bacteroidales	f__Paludibacteraceae	g__Paludibacter	s__unclassified_g__Paludibacter	ASV1606	112	0.000126715	0	0	0	112	0	0	0	0	0	0	0	0	0	0	0	0
d__Bacteria	k__norank_d__Bacteria	p__Bacteroidota	c__Bacteroidia	o__Flavobacteriales	f__Flavobacteriaceae	g__unclassified_f__Flavobacteriaceae	s__unclassified_f__Flavobacteriaceae	ASV4722	106	0.000119927	0	0	0	0	0	0	0	106	0	0	0	0	0	0	0	0
d__Bacteria	k__norank_d__Bacteria	p__Actinobacteriota	c__Actinobacteria	o__Micrococcales	f__Microbacteriaceae	g__Agrococcus	s__Leucobacter_sp._CSB21	ASV2083	100	0.000113139	96	0	0	0	0	0	0	0	0	0	0	0	0	0	0	4
d__Bacteria	k__norank_d__Bacteria	p__Proteobacteria	c__Gammaproteobacteria	o__Burkholderiales	f__Oxalobacteraceae	g__Massilia	s__unclassified_g__Massilia	ASV2426	104	0.000117664	0	14	90	0	0	0	0	0	0	0	0	0	0	0	0	0
d__Bacteria	k__norank_d__Bacteria	p__Firmicutes	c__Clostridia	o__Oscillospirales	f__Ruminococcaceae	g__Faecalibacterium	s__unclassified_g__Faecalibacterium	ASV352	104	0.000117664	0	0	0	0	44	54	0	0	6	0	0	0	0	0	0	0
d__Bacteria	k__norank_d__Bacteria	p__Firmicutes	c__Clostridia	o__Clostridiales	f__Clostridiaceae	g__Clostridium_sensu_stricto_1	s__unclassified_g__Clostridium_sensu_stricto_1	ASV4725	100	0.000113139	0	0	0	0	0	0	0	91	0	0	0	0	0	0	0	9
d__Bacteria	k__norank_d__Bacteria	p__Actinobacteriota	c__Actinobacteria	o__Kineosporiales	f__Kineosporiaceae	g__Kineococcus	s__unclassified_g__Kineococcus	ASV3509	108	0.00012219	0	76	0	0	0	0	0	8	19	0	0	5	0	0	0	0
d__Bacteria	k__norank_d__Bacteria	p__Actinobacteriota	c__Actinobacteria	o__Pseudonocardiales	f__Pseudonocardiaceae	g__Amycolatopsis	s__unclassified_g__Amycolatopsis	ASV2450	106	0.000119927	0	35	71	0	0	0	0	0	0	0	0	0	0	0	0	0
d__Bacteria	k__norank_d__Bacteria	p__Proteobacteria	c__Gammaproteobacteria	o__Burkholderiales	f__Comamonadaceae	g__unclassified_f__Comamonadaceae	s__unclassified_f__Comamonadaceae	ASV650	113	0.000127847	0	0	0	108	5	0	0	0	0	0	0	0	0	0	0	0
d__Bacteria	k__norank_d__Bacteria	p__RCP2-54	c__norank_p__RCP2-54	o__norank_c__norank_p__RCP2-54	f__norank_o__norank_c__norank_p__RCP2-54	g__norank_f__norank_o__norank_c__norank_p__RCP2-54	s__unclassified_g__norank_f__norank_o__norank_c__norank_p__RCP2-54	ASV3467	105	0.000118795	0	105	0	0	0	0	0	0	0	0	0	0	0	0	0	0
d__Bacteria	k__norank_d__Bacteria	p__Proteobacteria	c__Alphaproteobacteria	o__Rhizobiales	f__Rhizobiaceae	g__Candidatus_Liberibacter	s__unclassified_g__Candidatus_Liberibacter	ASV5574	91	0.000102956	0	0	0	0	0	0	0	0	91	0	0	0	0	0	0	0
d__Bacteria	k__norank_d__Bacteria	p__Proteobacteria	c__Gammaproteobacteria	o__Burkholderiales	f__Comamonadaceae	g__Polaromonas	s__unclassified_g__Polaromonas	ASV2080	101	0.00011427	101	0	0	0	0	0	0	0	0	0	0	0	0	0	0	0
d__Bacteria	k__norank_d__Bacteria	p__Proteobacteria	c__Gammaproteobacteria	o__Burkholderiales	f__Rhodocyclaceae	g__Zoogloea	s__unclassified_g__Zoogloea	ASV2081	93	0.000105219	93	0	0	0	0	0	0	0	0	0	0	0	0	0	0	0
d__Bacteria	k__norank_d__Bacteria	p__Firmicutes	c__Clostridia	o__Oscillospirales	f__Eubacterium_coprostanoligenes_group	g__norank_f__Eubacterium_coprostanoligenes_group	s__unclassified_g__norank_f__Eubacterium_coprostanoligenes_group	ASV45	101	0.00011427	0	0	0	0	12	0	45	8	0	2	1	0	0	11	22	0
d__Bacteria	k__norank_d__Bacteria	p__Bacteroidota	c__Bacteroidia	o__Bacteroidales	f__Marinilabiliaceae	g__Cytophaga_xylanolytica_group	s__uncultured_bacterium_g__Cytophaga_xylanolytica_group	ASV685	94	0.00010635	59	0	30	0	5	0	0	0	0	0	0	0	0	0	0	0
d__Bacteria	k__norank_d__Bacteria	p__Myxococcota	c__Myxococcia	o__Myxococcales	f__Myxococcaceae	g__norank_f__Myxococcaceae	s__uncultured_bacterium_g__norank_f__Myxococcaceae	ASV2082	93	0.000105219	93	0	0	0	0	0	0	0	0	0	0	0	0	0	0	0
d__Bacteria	k__norank_d__Bacteria	p__Firmicutes	c__Clostridia	o__Peptostreptococcales-Tissierellales	f__norank_o__Peptostreptococcales-Tissierellales	g__Tepidimicrobium	s__unclassified_g__Tepidimicrobium	ASV1610	109	0.000123321	0	0	0	109	0	0	0	0	0	0	0	0	0	0	0	0
d__Bacteria	k__norank_d__Bacteria	p__Bacteroidota	c__Bacteroidia	o__Bacteroidales	f__Bacteroidaceae	g__Bacteroides	s__unclassified_g__Bacteroides	ASV354	99	0.000112007	0	0	0	0	41	0	58	0	0	0	0	0	0	0	0	0
d__Bacteria	k__norank_d__Bacteria	p__Actinobacteriota	c__unclassified_p__Actinobacteriota	o__unclassified_p__Actinobacteriota	f__unclassified_p__Actinobacteriota	g__unclassified_p__Actinobacteriota	s__unclassified_p__Actinobacteriota	ASV3468	101	0.00011427	0	101	0	0	0	0	0	0	0	0	0	0	0	0	0	0
d__Bacteria	k__norank_d__Bacteria	p__Proteobacteria	c__Alphaproteobacteria	o__Rhizobiales	f__Devosiaceae	g__Devosia	s__unclassified_g__Devosia	ASV2085	92	0.000104087	92	0	0	0	0	0	0	0	0	0	0	0	0	0	0	0
d__Bacteria	k__norank_d__Bacteria	p__Firmicutes	c__Clostridia	o__Lachnospirales	f__Lachnospiraceae	g__Fusicatenibacter	s__unclassified_g__Fusicatenibacter	ASV2084	93	0.000105219	93	0	0	0	0	0	0	0	0	0	0	0	0	0	0	0
d__Bacteria	k__norank_d__Bacteria	p__Actinobacteriota	c__Actinobacteria	o__Micrococcales	f__Intrasporangiaceae	g__Tetrasphaera	s__unclassified_g__Tetrasphaera	ASV2420	99	0.000112007	0	0	99	0	0	0	0	0	0	0	0	0	0	0	0	0
d__Bacteria	k__norank_d__Bacteria	p__Proteobacteria	c__Gammaproteobacteria	o__Burkholderiales	f__Comamonadaceae	g__unclassified_f__Comamonadaceae	s__unclassified_f__Comamonadaceae	ASV1862	103	0.000116533	0	0	65	32	0	0	0	0	0	0	6	0	0	0	0	0
d__Bacteria	k__norank_d__Bacteria	p__Firmicutes	c__Bacilli	o__Bacillales	f__Bacillaceae	g__Bacillus	s__unclassified_g__Bacillus	ASV4723	96	0.000108613	0	0	0	0	0	0	0	96	0	0	0	0	0	0	0	0
d__Bacteria	k__norank_d__Bacteria	p__Proteobacteria	c__Gammaproteobacteria	o__Burkholderiales	f__Neisseriaceae	g__norank_f__Neisseriaceae	s__uncultured_bacterium_g__norank_f__Neisseriaceae	ASV2102	92	0.000104087	82	8	0	0	0	0	0	0	0	0	0	2	0	0	0	0
d__Bacteria	k__norank_d__Bacteria	p__Actinobacteriota	c__Actinobacteria	o__Micrococcales	f__Micrococcaceae	g__Glutamicibacter	s__unclassified_g__Glutamicibacter	ASV2087	90	0.000101825	90	0	0	0	0	0	0	0	0	0	0	0	0	0	0	0
d__Bacteria	k__norank_d__Bacteria	p__Firmicutes	c__Clostridia	o__Oscillospirales	f__Ruminococcaceae	g__Faecalibacterium	s__unclassified_g__Faecalibacterium	ASV342	103	0.000116533	0	0	0	0	57	0	43	0	0	0	0	0	3	0	0	0
d__Bacteria	k__norank_d__Bacteria	p__Proteobacteria	c__Gammaproteobacteria	o__Enterobacterales	f__Erwiniaceae	g__unclassified_f__Erwiniaceae	s__unclassified_f__Erwiniaceae	ASV1651	97	0.000109744	0	22	0	75	0	0	0	0	0	0	0	0	0	0	0	0
d__Bacteria	k__norank_d__Bacteria	p__Proteobacteria	c__Gammaproteobacteria	o__Burkholderiales	f__Sutterellaceae	g__norank_f__Sutterellaceae	s__uncultured_prokaryote_g__norank_f__Sutterellaceae	ASV1631	107	0.000121058	0	0	0	92	0	0	0	0	0	0	0	0	0	0	0	15
d__Bacteria	k__norank_d__Bacteria	p__Actinobacteriota	c__Actinobacteria	o__Frankiales	f__Acidothermaceae	g__Acidothermus	s__unclassified_g__Acidothermus	ASV3469	97	0.000109744	0	97	0	0	0	0	0	0	0	0	0	0	0	0	0	0
d__Bacteria	k__norank_d__Bacteria	p__Firmicutes	c__Clostridia	o__Lachnospirales	f__Lachnospiraceae	g__Eubacterium_hallii_group	s__unclassified_g__Eubacterium_hallii_group	ASV377	101	0.00011427	0	0	0	0	26	16	59	0	0	0	0	0	0	0	0	0
d__Bacteria	k__norank_d__Bacteria	p__Proteobacteria	c__Alphaproteobacteria	o__Sphingomonadales	f__Sphingomonadaceae	g__Sphingomonas	s__unclassified_g__Sphingomonas	ASV2088	90	0.000101825	90	0	0	0	0	0	0	0	0	0	0	0	0	0	0	0
d__Bacteria	k__norank_d__Bacteria	p__Bacteroidota	c__Bacteroidia	o__Chitinophagales	f__Saprospiraceae	g__Membranicola	s__uncultured_Membranicola_sp.	ASV4724	93	0.000105219	0	0	0	0	0	0	0	93	0	0	0	0	0	0	0	0
d__Bacteria	k__norank_d__Bacteria	p__Firmicutes	c__Clostridia	o__Lachnospirales	f__Lachnospiraceae	g__Agathobacter	s__unclassified_g__Agathobacter	ASV369	97	0.000109744	0	0	0	0	29	0	60	0	0	0	0	8	0	0	0	0
d__Bacteria	k__norank_d__Bacteria	p__Bacteroidota	c__Bacteroidia	o__Bacteroidales	f__Barnesiellaceae	g__norank_f__Barnesiellaceae	s__uncultured_bacterium_g__norank_f__Barnesiellaceae	ASV2421	103	0.000116533	0	0	103	0	0	0	0	0	0	0	0	0	0	0	0	0
d__Bacteria	k__norank_d__Bacteria	p__Bacteroidota	c__Bacteroidia	o__Flavobacteriales	f__Flavobacteriaceae	g__Ulvibacter	s__uncultured_bacterium_g__Ulvibacter	ASV2091	84	9.50364e-05	84	0	0	0	0	0	0	0	0	0	0	0	0	0	0	0
d__Bacteria	k__norank_d__Bacteria	p__Chloroflexi	c__Dehalococcoidia	o__S085	f__norank_o__S085	g__norank_f__norank_o__S085	s__uncultured_bacterium_g__norank_f__norank_o__S085	ASV2092	95	0.000107482	95	0	0	0	0	0	0	0	0	0	0	0	0	0	0	0
d__Bacteria	k__norank_d__Bacteria	p__Actinobacteriota	c__Thermoleophilia	o__Gaiellales	f__Gaiellaceae	g__Gaiella	s__unclassified_g__Gaiella	ASV2090	87	9.84305e-05	87	0	0	0	0	0	0	0	0	0	0	0	0	0	0	0
d__Bacteria	k__norank_d__Bacteria	p__Firmicutes	c__Bacilli	o__Bacillales	f__Bacillaceae	g__Bacillus	s__unclassified_g__Bacillus	ASV1612	99	0.000112007	0	0	0	99	0	0	0	0	0	0	0	0	0	0	0	0
d__Bacteria	k__norank_d__Bacteria	p__Bacteroidota	c__Bacteroidia	o__Bacteroidales	f__Bacteroidaceae	g__Bacteroides	s__Bacteroides_timonensis	ASV351	106	0.000119927	0	0	0	0	46	29	19	0	0	5	2	0	0	0	5	0
d__Bacteria	k__norank_d__Bacteria	p__Proteobacteria	c__Alphaproteobacteria	o__Rhizobiales	f__Beijerinckiaceae	g__1174-901-12	s__unclassified_g__1174-901-12	ASV2651	100	0.000113139	0	70	30	0	0	0	0	0	0	0	0	0	0	0	0	0
d__Bacteria	k__norank_d__Bacteria	p__Bacteroidota	c__Bacteroidia	o__Bacteroidales	f__Bacteroidaceae	g__Bacteroides	s__unclassified_g__Bacteroides	ASV417	105	0.000118795	0	0	0	0	18	10	71	0	0	0	0	0	6	0	0	0
d__Bacteria	k__norank_d__Bacteria	p__Proteobacteria	c__Alphaproteobacteria	o__Rhizobiales	f__Beijerinckiaceae	g__Methylobacterium-Methylorubrum	s__unclassified_g__Methylobacterium-Methylorubrum	ASV3742	91	0.000102956	0	29	0	0	0	0	0	0	0	0	0	0	0	0	62	0
d__Bacteria	k__norank_d__Bacteria	p__Acidobacteriota	c__Acidobacteriae	o__Subgroup_2	f__norank_o__Subgroup_2	g__norank_f__norank_o__Subgroup_2	s__unclassified_g__norank_f__norank_o__Subgroup_2	ASV3471	97	0.000109744	0	97	0	0	0	0	0	0	0	0	0	0	0	0	0	0
d__Bacteria	k__norank_d__Bacteria	p__Acidobacteriota	c__Acidobacteriae	o__Subgroup_2	f__norank_o__Subgroup_2	g__norank_f__norank_o__Subgroup_2	s__uncultured_Holophaga_sp._g__norank_f__norank_o__Subgroup_2	ASV3470	97	0.000109744	0	97	0	0	0	0	0	0	0	0	0	0	0	0	0	0
d__Bacteria	k__norank_d__Bacteria	p__Actinobacteriota	c__Actinobacteria	o__Propionibacteriales	f__Nocardioidaceae	g__Nocardioides	s__unclassified_g__Nocardioides	ASV2094	87	9.84305e-05	87	0	0	0	0	0	0	0	0	0	0	0	0	0	0	0
d__Bacteria	k__norank_d__Bacteria	p__Proteobacteria	c__Gammaproteobacteria	o__Enterobacterales	f__Erwiniaceae	g__Rosenbergiella	s__unclassified_g__Rosenbergiella	ASV2093	89	0.000100693	89	0	0	0	0	0	0	0	0	0	0	0	0	0	0	0
d__Bacteria	k__norank_d__Bacteria	p__Firmicutes	c__Bacilli	o__Bacillales	f__Bacillaceae	g__Cerasibacillus	s__Cerasibacillus_quisquiliarum	ASV1613	101	0.00011427	0	0	0	101	0	0	0	0	0	0	0	0	0	0	0	0
d__Bacteria	k__norank_d__Bacteria	p__Proteobacteria	c__Alphaproteobacteria	o__Caulobacterales	f__Caulobacteraceae	g__Caulobacter	s__unclassified_g__Caulobacter	ASV1715	100	0.000113139	42	0	0	58	0	0	0	0	0	0	0	0	0	0	0	0
d__Bacteria	k__norank_d__Bacteria	p__Proteobacteria	c__Gammaproteobacteria	o__Burkholderiales	f__Rhodocyclaceae	g__Thauera	s__unclassified_g__Thauera	ASV2422	104	0.000117664	0	0	104	0	0	0	0	0	0	0	0	0	0	0	0	0
d__Bacteria	k__norank_d__Bacteria	p__Bacteroidota	c__Bacteroidia	o__Bacteroidales	f__Prevotellaceae	g__Prevotella	s__unclassified_g__Prevotella	ASV2924	97	0.000109744	0	0	0	0	0	0	62	0	0	0	0	29	0	0	6	0
d__Bacteria	k__norank_d__Bacteria	p__Proteobacteria	c__Alphaproteobacteria	o__Rhizobiales	f__Xanthobacteraceae	g__norank_f__Xanthobacteraceae	s__unclassified_g__norank_f__Xanthobacteraceae	ASV3472	104	0.000117664	0	104	0	0	0	0	0	0	0	0	0	0	0	0	0	0
d__Bacteria	k__norank_d__Bacteria	p__Bacteroidota	c__Bacteroidia	o__Bacteroidales	f__Bacteroidaceae	g__Bacteroides	s__unclassified_g__Bacteroides	ASV270	94	0.00010635	0	0	0	0	24	9	43	10	0	5	0	0	0	3	0	0
d__Bacteria	k__norank_d__Bacteria	p__Proteobacteria	c__Gammaproteobacteria	o__Pseudomonadales	f__Pseudomonadaceae	g__Pseudomonas	s__unclassified_g__Pseudomonas	ASV2095	80	9.05108e-05	80	0	0	0	0	0	0	0	0	0	0	0	0	0	0	0
d__Bacteria	k__norank_d__Bacteria	p__Bacteroidota	c__Bacteroidia	o__Bacteroidales	f__Bacteroidaceae	g__Bacteroides	s__unclassified_g__Bacteroides	ASV362	98	0.000110876	0	0	0	0	33	0	44	9	3	0	0	9	0	0	0	0
d__Bacteria	k__norank_d__Bacteria	p__Acidobacteriota	c__Acidobacteriae	o__Subgroup_2	f__norank_o__Subgroup_2	g__norank_f__norank_o__Subgroup_2	s__uncultured_Acidobacteria_bacterium_g__norank_f__norank_o__Subgroup_2	ASV3473	98	0.000110876	0	98	0	0	0	0	0	0	0	0	0	0	0	0	0	0
d__Bacteria	k__norank_d__Bacteria	p__Bacteroidota	c__Bacteroidia	o__Bacteroidales	f__Barnesiellaceae	g__Coprobacter	s__uncultured_organism_g__Coprobacter	ASV365	91	0.000102956	0	0	0	0	36	27	15	13	0	0	0	0	0	0	0	0
d__Bacteria	k__norank_d__Bacteria	p__Bacteroidota	c__Bacteroidia	o__Bacteroidales	f__Dysgonomonadaceae	g__norank_f__Dysgonomonadaceae	s__uncultured_bacterium_g__norank_f__Dysgonomonadaceae	ASV2423	97	0.000109744	0	0	97	0	0	0	0	0	0	0	0	0	0	0	0	0
d__Bacteria	k__norank_d__Bacteria	p__Bacteroidota	c__Bacteroidia	o__Bacteroidales	f__Prolixibacteraceae	g__WCHB1-32	s__unclassified_g__WCHB1-32	ASV1242	97	0.000109744	0	0	42	49	0	6	0	0	0	0	0	0	0	0	0	0
d__Bacteria	k__norank_d__Bacteria	p__Firmicutes	c__Bacilli	o__Staphylococcales	f__Staphylococcaceae	g__Staphylococcus	s__unclassified_g__Staphylococcus	ASV2097	79	8.93795e-05	79	0	0	0	0	0	0	0	0	0	0	0	0	0	0	0
d__Bacteria	k__norank_d__Bacteria	p__Bacteroidota	c__Bacteroidia	o__Bacteroidales	f__Bacteroidaceae	g__Bacteroides	s__Bacteroides_caccae	ASV388	95	0.000107482	0	0	0	0	22	17	21	21	0	4	0	0	10	0	0	0
d__Bacteria	k__norank_d__Bacteria	p__Proteobacteria	c__Alphaproteobacteria	o__Rhizobiales	f__Rhizobiaceae	g__Ensifer	s__unclassified_g__Ensifer	ASV1616	90	0.000101825	0	0	0	90	0	0	0	0	0	0	0	0	0	0	0	0
d__Bacteria	k__norank_d__Bacteria	p__Actinobacteriota	c__Actinobacteria	o__Micrococcales	f__Micrococcaceae	g__unclassified_f__Micrococcaceae	s__unclassified_f__Micrococcaceae	ASV2096	90	0.000101825	90	0	0	0	0	0	0	0	0	0	0	0	0	0	0	0
d__Bacteria	k__norank_d__Bacteria	p__Myxococcota	c__Myxococcia	o__Myxococcales	f__Myxococcaceae	g__P3OB-42	s__unclassified_g__P3OB-42	ASV2424	91	0.000102956	0	0	91	0	0	0	0	0	0	0	0	0	0	0	0	0
d__Bacteria	k__norank_d__Bacteria	p__Actinobacteriota	c__Thermoleophilia	o__Solirubrobacterales	f__Solirubrobacteraceae	g__Conexibacter	s__unclassified_g__Conexibacter	ASV3474	94	0.00010635	0	94	0	0	0	0	0	0	0	0	0	0	0	0	0	0
d__Bacteria	k__norank_d__Bacteria	p__Bacteroidota	c__Bacteroidia	o__Flavobacteriales	f__Flavobacteriaceae	g__Flavobacterium	s__unclassified_g__Flavobacterium	ASV2425	96	0.000108613	0	0	96	0	0	0	0	0	0	0	0	0	0	0	0	0
d__Bacteria	k__norank_d__Bacteria	p__Actinobacteriota	c__Actinobacteria	o__Frankiales	f__Acidothermaceae	g__Acidothermus	s__unclassified_g__Acidothermus	ASV3475	95	0.000107482	0	95	0	0	0	0	0	0	0	0	0	0	0	0	0	0
d__Bacteria	k__norank_d__Bacteria	p__Proteobacteria	c__Gammaproteobacteria	o__Burkholderiales	f__Methylophilaceae	g__Methylotenera	s__unclassified_g__Methylotenera	ASV1617	91	0.000102956	0	0	0	91	0	0	0	0	0	0	0	0	0	0	0	0
d__Bacteria	k__norank_d__Bacteria	p__Proteobacteria	c__Alphaproteobacteria	o__Sphingomonadales	f__Sphingomonadaceae	g__Sphingomonas	s__unclassified_g__Sphingomonas	ASV1960	92	0.000104087	52	22	0	18	0	0	0	0	0	0	0	0	0	0	0	0
d__Bacteria	k__norank_d__Bacteria	p__Nitrospirota	c__Nitrospiria	o__Nitrospirales	f__Nitrospiraceae	g__Nitrospira	s__unclassified_g__Nitrospira	ASV2505	90	0.000101825	0	0	45	0	0	0	20	10	0	3	0	12	0	0	0	0
d__Bacteria	k__norank_d__Bacteria	p__Actinobacteriota	c__Acidimicrobiia	o__norank_c__Acidimicrobiia	f__norank_o__norank_c__Acidimicrobiia	g__norank_f__norank_o__norank_c__Acidimicrobiia	s__uncultured_forest_soil_bacterium_g__norank_f__norank_o__norank_c__Acidimicrobiia	ASV3476	98	0.000110876	0	98	0	0	0	0	0	0	0	0	0	0	0	0	0	0
d__Bacteria	k__norank_d__Bacteria	p__Actinobacteriota	c__Actinobacteria	o__Micrococcales	f__Intrasporangiaceae	g__unclassified_f__Intrasporangiaceae	s__unclassified_f__Intrasporangiaceae	ASV3292	106	0.000119927	0	0	0	0	0	0	0	0	0	106	0	0	0	0	0	0
d__Bacteria	k__norank_d__Bacteria	p__Proteobacteria	c__Gammaproteobacteria	o__Burkholderiales	f__Rhodocyclaceae	g__Zoogloea	s__uncultured_Zoogloea_sp._g__Zoogloea	ASV2098	84	9.50364e-05	84	0	0	0	0	0	0	0	0	0	0	0	0	0	0	0
d__Bacteria	k__norank_d__Bacteria	p__Bacteroidota	c__Bacteroidia	o__Bacteroidales	f__unclassified_o__Bacteroidales	g__unclassified_o__Bacteroidales	s__unclassified_o__Bacteroidales	ASV2636	100	0.000113139	0	66	34	0	0	0	0	0	0	0	0	0	0	0	0	0
d__Bacteria	k__norank_d__Bacteria	p__Actinobacteriota	c__Actinobacteria	o__Frankiales	f__Acidothermaceae	g__Acidothermus	s__unclassified_g__Acidothermus	ASV3477	94	0.00010635	0	94	0	0	0	0	0	0	0	0	0	0	0	0	0	0
d__Bacteria	k__norank_d__Bacteria	p__Proteobacteria	c__Gammaproteobacteria	o__Burkholderiales	f__Comamonadaceae	g__unclassified_f__Comamonadaceae	s__unclassified_f__Comamonadaceae	ASV27	97	0.000109744	0	0	0	0	39	0	25	0	0	6	6	0	0	21	0	0
d__Bacteria	k__norank_d__Bacteria	p__Deinococcota	c__Deinococci	o__Deinococcales	f__Deinococcaceae	g__Deinococcus	s__Deinococcus_sp._UAC-77	ASV2122	89	0.000100693	74	0	0	0	0	0	0	8	0	0	0	0	0	0	7	0
d__Bacteria	k__norank_d__Bacteria	p__Firmicutes	c__Bacilli	o__Bacillales	f__Bacillaceae	g__Bacillus	s__unclassified_g__Bacillus	ASV1618	98	0.000110876	0	0	0	98	0	0	0	0	0	0	0	0	0	0	0	0
d__Bacteria	k__norank_d__Bacteria	p__Proteobacteria	c__Gammaproteobacteria	o__Gammaproteobacteria_Incertae_Sedis	f__unclassified_o__Gammaproteobacteria_Incertae_Sedis	g__Acidibacter	s__unclassified_g__Acidibacter	ASV3478	95	0.000107482	0	95	0	0	0	0	0	0	0	0	0	0	0	0	0	0
d__Bacteria	k__norank_d__Bacteria	p__Acidobacteriota	c__Acidobacteriae	o__Acidobacteriales	f__Acidobacteriaceae_Subgroup_1	g__Granulicella	s__unclassified_g__Granulicella	ASV3479	93	0.000105219	0	93	0	0	0	0	0	0	0	0	0	0	0	0	0	0
d__Bacteria	k__norank_d__Bacteria	p__Firmicutes	c__Bacilli	o__Lactobacillales	f__Streptococcaceae	g__Streptococcus	s__unclassified_g__Streptococcus	ASV26	85	9.61678e-05	0	0	0	0	12	17	19	17	0	0	0	0	0	20	0	0
d__Bacteria	k__norank_d__Bacteria	p__Actinobacteriota	c__Actinobacteria	o__Corynebacteriales	f__Mycobacteriaceae	g__Mycobacterium	s__unclassified_g__Mycobacterium	ASV3480	95	0.000107482	0	95	0	0	0	0	0	0	0	0	0	0	0	0	0	0
d__Bacteria	k__norank_d__Bacteria	p__Proteobacteria	c__Gammaproteobacteria	o__Burkholderiales	f__Burkholderiaceae	g__Burkholderia-Caballeronia-Paraburkholderia	s__unclassified_g__Burkholderia-Caballeronia-Paraburkholderia	ASV2191	90	0.000101825	33	26	31	0	0	0	0	0	0	0	0	0	0	0	0	0
d__Bacteria	k__norank_d__Bacteria	p__Actinobacteriota	c__Actinobacteria	o__Frankiales	f__Acidothermaceae	g__Acidothermus	s__unclassified_g__Acidothermus	ASV3481	84	9.50364e-05	0	84	0	0	0	0	0	0	0	0	0	0	0	0	0	0
d__Bacteria	k__norank_d__Bacteria	p__Actinobacteriota	c__Actinobacteria	o__Micrococcales	f__Micrococcaceae	g__Kocuria	s__unclassified_g__Kocuria	ASV1343	97	0.000109744	26	0	0	0	0	4	0	0	0	67	0	0	0	0	0	0
d__Bacteria	k__norank_d__Bacteria	p__Proteobacteria	c__Alphaproteobacteria	o__Acetobacterales	f__Acetobacteraceae	g__unclassified_f__Acetobacteraceae	s__unclassified_f__Acetobacteraceae	ASV3482	92	0.000104087	0	92	0	0	0	0	0	0	0	0	0	0	0	0	0	0
d__Bacteria	k__norank_d__Bacteria	p__Myxococcota	c__Polyangia	o__Polyangiales	f__Phaselicystidaceae	g__Phaselicystis	s__unclassified_g__Phaselicystis	ASV1849	87	9.84305e-05	51	0	0	36	0	0	0	0	0	0	0	0	0	0	0	0
d__Bacteria	k__norank_d__Bacteria	p__Proteobacteria	c__Alphaproteobacteria	o__Rhizobiales	f__Devosiaceae	g__unclassified_f__Devosiaceae	s__unclassified_f__Devosiaceae	ASV2100	83	9.3905e-05	83	0	0	0	0	0	0	0	0	0	0	0	0	0	0	0
d__Bacteria	k__norank_d__Bacteria	p__Actinobacteriota	c__Actinobacteria	o__Micrococcales	f__Dermabacteraceae	g__Brachybacterium	s__unclassified_g__Brachybacterium	ASV2107	84	9.50364e-05	83	0	0	0	0	0	0	0	0	0	1	0	0	0	0	0
d__Bacteria	k__norank_d__Bacteria	p__Actinobacteriota	c__Actinobacteria	o__Frankiales	f__norank_o__Frankiales	g__norank_f__norank_o__Frankiales	s__uncultured_bacterium_g__norank_f__norank_o__Frankiales	ASV2099	77	8.71167e-05	77	0	0	0	0	0	0	0	0	0	0	0	0	0	0	0
d__Bacteria	k__norank_d__Bacteria	p__Proteobacteria	c__Gammaproteobacteria	o__Burkholderiales	f__Burkholderiaceae	g__Burkholderia-Caballeronia-Paraburkholderia	s__unclassified_g__Burkholderia-Caballeronia-Paraburkholderia	ASV3483	88	9.95619e-05	0	88	0	0	0	0	0	0	0	0	0	0	0	0	0	0
d__Bacteria	k__norank_d__Bacteria	p__Actinobacteriota	c__Actinobacteria	o__Corynebacteriales	f__Corynebacteriaceae	g__Corynebacterium	s__unclassified_g__Corynebacterium	ASV2101	84	9.50364e-05	84	0	0	0	0	0	0	0	0	0	0	0	0	0	0	0
d__Bacteria	k__norank_d__Bacteria	p__Acidobacteriota	c__Acidobacteriae	o__Bryobacterales	f__Bryobacteraceae	g__Bryobacter	s__unclassified_g__Bryobacter	ASV3486	89	0.000100693	0	89	0	0	0	0	0	0	0	0	0	0	0	0	0	0
d__Bacteria	k__norank_d__Bacteria	p__Firmicutes	c__Clostridia	o__Lachnospirales	f__Lachnospiraceae	g__Lachnoclostridium	s__Clostridium_glycyrrhizinilyticum	ASV355	91	0.000102956	0	0	0	0	40	35	7	0	3	0	0	6	0	0	0	0
d__Bacteria	k__norank_d__Bacteria	p__unclassified_k__norank_d__Bacteria	c__unclassified_k__norank_d__Bacteria	o__unclassified_k__norank_d__Bacteria	f__unclassified_k__norank_d__Bacteria	g__unclassified_k__norank_d__Bacteria	s__unclassified_k__norank_d__Bacteria	ASV1853	86	9.72992e-05	53	0	0	33	0	0	0	0	0	0	0	0	0	0	0	0
d__Bacteria	k__norank_d__Bacteria	p__Firmicutes	c__Clostridia	o__Lachnospirales	f__Lachnospiraceae	g__Coprococcus	s__unclassified_g__Coprococcus	ASV1646	93	0.000105219	0	0	0	79	0	0	0	11	0	0	0	0	3	0	0	0
d__Bacteria	k__norank_d__Bacteria	p__Proteobacteria	c__Alphaproteobacteria	o__Rhizobiales	f__Devosiaceae	g__Pelagibacterium	s__unclassified_g__Pelagibacterium	ASV4726	80	9.05108e-05	0	0	0	0	0	0	0	80	0	0	0	0	0	0	0	0
d__Bacteria	k__norank_d__Bacteria	p__Proteobacteria	c__Alphaproteobacteria	o__Rhizobiales	f__Xanthobacteraceae	g__norank_f__Xanthobacteraceae	s__uncultured_forest_soil_bacterium_g__norank_f__Xanthobacteraceae	ASV3487	95	0.000107482	0	95	0	0	0	0	0	0	0	0	0	0	0	0	0	0
d__Bacteria	k__norank_d__Bacteria	p__Firmicutes	c__Bacilli	o__Lactobacillales	f__Streptococcaceae	g__Streptococcus	s__unclassified_g__Streptococcus	ASV2427	81	9.16422e-05	0	0	81	0	0	0	0	0	0	0	0	0	0	0	0	0
d__Bacteria	k__norank_d__Bacteria	p__Actinobacteriota	c__Actinobacteria	o__Frankiales	f__Acidothermaceae	g__Acidothermus	s__unclassified_g__Acidothermus	ASV3484	96	0.000108613	0	96	0	0	0	0	0	0	0	0	0	0	0	0	0	0
d__Bacteria	k__norank_d__Bacteria	p__Proteobacteria	c__Alphaproteobacteria	o__Rhizobiales	f__Devosiaceae	g__Devosia	s__unclassified_g__Devosia	ASV2104	82	9.27736e-05	82	0	0	0	0	0	0	0	0	0	0	0	0	0	0	0
d__Bacteria	k__norank_d__Bacteria	p__Acidobacteriota	c__Acidobacteriae	o__Bryobacterales	f__Bryobacteraceae	g__Bryobacter	s__unclassified_g__Bryobacter	ASV3485	91	0.000102956	0	91	0	0	0	0	0	0	0	0	0	0	0	0	0	0
d__Bacteria	k__norank_d__Bacteria	p__Actinobacteriota	c__Actinobacteria	o__Frankiales	f__Geodermatophilaceae	g__Blastococcus	s__unclassified_g__Blastococcus	ASV2007	88	9.95619e-05	0	75	0	2	0	0	0	0	0	0	0	11	0	0	0	0
d__Bacteria	k__norank_d__Bacteria	p__Gemmatimonadota	c__Longimicrobia	o__Longimicrobiales	f__Longimicrobiaceae	g__norank_f__Longimicrobiaceae	s__uncultured_bacterium_g__norank_f__Longimicrobiaceae	ASV4727	89	0.000100693	0	0	0	0	0	0	0	89	0	0	0	0	0	0	0	0
d__Bacteria	k__norank_d__Bacteria	p__Firmicutes	c__Bacilli	o__Lactobacillales	f__Enterococcaceae	g__Enterococcus	s__unclassified_g__Enterococcus	ASV1821	91	0.000102956	49	0	0	42	0	0	0	0	0	0	0	0	0	0	0	0
d__Bacteria	k__norank_d__Bacteria	p__Proteobacteria	c__Gammaproteobacteria	o__Xanthomonadales	f__Xanthomonadaceae	g__unclassified_f__Xanthomonadaceae	s__unclassified_f__Xanthomonadaceae	ASV1342	88	9.95619e-05	0	0	0	0	0	5	0	83	0	0	0	0	0	0	0	0
d__Bacteria	k__norank_d__Bacteria	p__SAR324_cladeMarine_group_B	c__norank_p__SAR324_cladeMarine_group_B	o__norank_c__norank_p__SAR324_cladeMarine_group_B	f__norank_o__norank_c__norank_p__SAR324_cladeMarine_group_B	g__norank_f__norank_o__norank_c__norank_p__SAR324_cladeMarine_group_B	s__unclassified_g__norank_f__norank_o__norank_c__norank_p__SAR324_cladeMarine_group_B	ASV2105	81	9.16422e-05	81	0	0	0	0	0	0	0	0	0	0	0	0	0	0	0
d__Bacteria	k__norank_d__Bacteria	p__Firmicutes	c__Clostridia	o__Lachnospirales	f__Lachnospiraceae	g__Dorea	s__unclassified_g__Dorea	ASV1621	94	0.00010635	0	0	0	94	0	0	0	0	0	0	0	0	0	0	0	0
d__Bacteria	k__norank_d__Bacteria	p__Proteobacteria	c__Gammaproteobacteria	o__Enterobacterales	f__Erwiniaceae	g__Pantoea	s__unclassified_g__Pantoea	ASV2129	85	9.61678e-05	64	0	0	0	0	0	0	0	0	0	0	21	0	0	0	0
d__Bacteria	k__norank_d__Bacteria	p__Verrucomicrobiota	c__Kiritimatiellae	o__WCHB1-41	f__norank_o__WCHB1-41	g__norank_f__norank_o__WCHB1-41	s__bacterium_enrichment_culture_clone_JCA3	ASV1623	93	0.000105219	0	0	0	93	0	0	0	0	0	0	0	0	0	0	0	0
d__Bacteria	k__norank_d__Bacteria	p__Proteobacteria	c__Alphaproteobacteria	o__Sphingomonadales	f__Sphingomonadaceae	g__Sphingomonas	s__unclassified_g__Sphingomonas	ASV2106	81	9.16422e-05	81	0	0	0	0	0	0	0	0	0	0	0	0	0	0	0
d__Bacteria	k__norank_d__Bacteria	p__Actinobacteriota	c__Actinobacteria	o__Micrococcales	f__Micrococcaceae	g__Kocuria	s__unclassified_g__Kocuria	ASV1622	90	0.000101825	0	0	0	90	0	0	0	0	0	0	0	0	0	0	0	0
d__Bacteria	k__norank_d__Bacteria	p__Proteobacteria	c__Gammaproteobacteria	o__KF-JG30-C25	f__norank_o__KF-JG30-C25	g__norank_f__norank_o__KF-JG30-C25	s__uncultured_soil_bacterium_g__norank_f__norank_o__KF-JG30-C25	ASV3492	88	9.95619e-05	0	83	0	0	0	0	0	0	0	0	0	5	0	0	0	0
d__Bacteria	k__norank_d__Bacteria	p__Proteobacteria	c__Alphaproteobacteria	o__Rhizobiales	f__Xanthobacteraceae	g__norank_f__Xanthobacteraceae	s__unclassified_g__norank_f__Xanthobacteraceae	ASV3488	90	0.000101825	0	90	0	0	0	0	0	0	0	0	0	0	0	0	0	0
d__Bacteria	k__norank_d__Bacteria	p__Bacteroidota	c__Bacteroidia	o__Sphingobacteriales	f__AKYH767	g__norank_f__AKYH767	s__uncultured_bacterium_g__norank_f__AKYH767	ASV2428	95	0.000107482	0	0	95	0	0	0	0	0	0	0	0	0	0	0	0	0
d__Bacteria	k__norank_d__Bacteria	p__Actinobacteriota	c__Actinobacteria	o__Micrococcales	f__Dermatophilaceae	g__norank_f__Dermatophilaceae	s__metagenome_g__norank_f__Dermatophilaceae	ASV2429	81	9.16422e-05	0	0	81	0	0	0	0	0	0	0	0	0	0	0	0	0
d__Bacteria	k__norank_d__Bacteria	p__Actinobacteriota	c__Actinobacteria	o__Corynebacteriales	f__Corynebacteriaceae	g__Lawsonella	s__uncultured_bacterium_g__Lawsonella	ASV1267	87	9.84305e-05	65	0	16	0	0	6	0	0	0	0	0	0	0	0	0	0
d__Bacteria	k__norank_d__Bacteria	p__Proteobacteria	c__Alphaproteobacteria	o__Sphingomonadales	f__Sphingomonadaceae	g__unclassified_f__Sphingomonadaceae	s__unclassified_f__Sphingomonadaceae	ASV1735	89	0.000100693	0	0	22	53	0	0	9	0	0	0	5	0	0	0	0	0
d__Bacteria	k__norank_d__Bacteria	p__Bacteroidota	c__Bacteroidia	o__Bacteroidales	f__Bacteroidaceae	g__Bacteroides	s__uncultured_prokaryote_g__Bacteroides	ASV2108	79	8.93795e-05	79	0	0	0	0	0	0	0	0	0	0	0	0	0	0	0
d__Bacteria	k__norank_d__Bacteria	p__Firmicutes	c__Clostridia	o__Oscillospirales	f__Ruminococcaceae	g__Faecalibacterium	s__unclassified_g__Faecalibacterium	ASV455	86	9.72992e-05	0	0	0	0	15	6	36	29	0	0	0	0	0	0	0	0
d__Bacteria	k__norank_d__Bacteria	p__Actinobacteriota	c__Actinobacteria	o__Micrococcales	f__Micrococcaceae	g__Glutamicibacter	s__unclassified_g__Glutamicibacter	ASV1624	91	0.000102956	0	0	0	91	0	0	0	0	0	0	0	0	0	0	0	0
d__Bacteria	k__norank_d__Bacteria	p__Bacteroidota	c__Bacteroidia	o__Bacteroidales	f__Prevotellaceae	g__Prevotella	s__unclassified_g__Prevotella	ASV2109	74	8.37225e-05	74	0	0	0	0	0	0	0	0	0	0	0	0	0	0	0
d__Bacteria	k__norank_d__Bacteria	p__Proteobacteria	c__Gammaproteobacteria	o__Burkholderiales	f__Burkholderiaceae	g__Burkholderia-Caballeronia-Paraburkholderia	s__unclassified_g__Burkholderia-Caballeronia-Paraburkholderia	ASV3489	93	0.000105219	0	93	0	0	0	0	0	0	0	0	0	0	0	0	0	0
d__Bacteria	k__norank_d__Bacteria	p__Acidobacteriota	c__Acidobacteriae	o__Subgroup_2	f__norank_o__Subgroup_2	g__norank_f__norank_o__Subgroup_2	s__unclassified_g__norank_f__norank_o__Subgroup_2	ASV3491	80	9.05108e-05	0	80	0	0	0	0	0	0	0	0	0	0	0	0	0	0
d__Bacteria	k__norank_d__Bacteria	p__Acidobacteriota	c__Acidobacteriae	o__Acidobacteriales	f__norank_o__Acidobacteriales	g__norank_f__norank_o__Acidobacteriales	s__unclassified_g__norank_f__norank_o__Acidobacteriales	ASV3490	87	9.84305e-05	0	87	0	0	0	0	0	0	0	0	0	0	0	0	0	0
d__Bacteria	k__norank_d__Bacteria	p__Bacteroidota	c__Bacteroidia	o__Bacteroidales	f__Dysgonomonadaceae	g__norank_f__Dysgonomonadaceae	s__uncultured_soil_bacterium_g__norank_f__Dysgonomonadaceae	ASV2436	89	0.000100693	0	0	83	0	0	0	0	6	0	0	0	0	0	0	0	0
d__Bacteria	k__norank_d__Bacteria	p__Bacteroidota	c__Bacteroidia	o__Bacteroidales	f__Paludibacteraceae	g__Paludibacter	s__Paratrimastix_pyriformis	ASV1625	88	9.95619e-05	0	0	0	88	0	0	0	0	0	0	0	0	0	0	0	0
d__Bacteria	k__norank_d__Bacteria	p__Firmicutes	c__Clostridia	o__Lachnospirales	f__Lachnospiraceae	g__Lachnoclostridium	s__metagenome_g__Lachnoclostridium	ASV432	87	9.84305e-05	0	0	0	0	15	0	66	0	4	2	0	0	0	0	0	0
d__Bacteria	k__norank_d__Bacteria	p__Actinobacteriota	c__Actinobacteria	o__Kineosporiales	f__Kineosporiaceae	g__Quadrisphaera	s__unclassified_g__Quadrisphaera	ASV1635	90	0.000101825	0	0	0	87	0	0	0	0	0	0	0	0	0	0	0	3
d__Bacteria	k__norank_d__Bacteria	p__Desulfobacterota	c__Desulfobacteria	o__Desulfobacterales	f__Desulfosarcinaceae	g__Sva0081_sediment_group	s__unclassified_g__Sva0081_sediment_group	ASV2118	81	9.16422e-05	76	0	0	0	0	0	0	0	0	0	0	0	0	0	0	5
d__Bacteria	k__norank_d__Bacteria	p__Bacteroidota	c__Bacteroidia	o__Bacteroidales	f__Marinilabiliaceae	g__Cytophaga_xylanolytica_group	s__unclassified_g__Cytophaga_xylanolytica_group	ASV1856	83	9.3905e-05	0	0	52	31	0	0	0	0	0	0	0	0	0	0	0	0
d__Bacteria	k__norank_d__Bacteria	p__Actinobacteriota	c__Actinobacteria	o__Micrococcales	f__Demequinaceae	g__unclassified_f__Demequinaceae	s__unclassified_f__Demequinaceae	ASV1627	81	9.16422e-05	0	0	0	81	0	0	0	0	0	0	0	0	0	0	0	0
d__Bacteria	k__norank_d__Bacteria	p__Proteobacteria	c__Gammaproteobacteria	o__Burkholderiales	f__B1-7BS	g__norank_f__B1-7BS	s__uncultured_Denitratisoma_sp._g__norank_f__B1-7BS	ASV1629	87	9.84305e-05	0	0	0	87	0	0	0	0	0	0	0	0	0	0	0	0
d__Bacteria	k__norank_d__Bacteria	p__Firmicutes	c__Bacilli	o__Bacillales	f__Planococcaceae	g__unclassified_f__Planococcaceae	s__unclassified_f__Planococcaceae	ASV1628	82	9.27736e-05	0	0	0	82	0	0	0	0	0	0	0	0	0	0	0	0
d__Bacteria	k__norank_d__Bacteria	p__Bacteroidota	c__Bacteroidia	o__Bacteroidales	f__Dysgonomonadaceae	g__Fermentimonas	s__unclassified_g__Fermentimonas	ASV2111	80	9.05108e-05	80	0	0	0	0	0	0	0	0	0	0	0	0	0	0	0
d__Bacteria	k__norank_d__Bacteria	p__Bacteroidota	c__Bacteroidia	o__Sphingobacteriales	f__Lentimicrobiaceae	g__Lentimicrobium	s__unclassified_g__Lentimicrobium	ASV1876	79	8.93795e-05	0	0	46	33	0	0	0	0	0	0	0	0	0	0	0	0
d__Bacteria	k__norank_d__Bacteria	p__Bacteroidota	c__Bacteroidia	o__Bacteroidales	f__Paludibacteraceae	g__Paludibacter	s__uncultured_bacterium_g__Paludibacter	ASV2112	83	9.3905e-05	83	0	0	0	0	0	0	0	0	0	0	0	0	0	0	0
d__Bacteria	k__norank_d__Bacteria	p__Proteobacteria	c__Gammaproteobacteria	o__Enterobacterales	f__Erwiniaceae	g__unclassified_f__Erwiniaceae	s__unclassified_f__Erwiniaceae	ASV1626	85	9.61678e-05	0	0	0	85	0	0	0	0	0	0	0	0	0	0	0	0
d__Bacteria	k__norank_d__Bacteria	p__Firmicutes	c__Clostridia	o__Lachnospirales	f__Lachnospiraceae	g__unclassified_f__Lachnospiraceae	s__unclassified_f__Lachnospiraceae	ASV1861	84	9.50364e-05	0	0	43	33	0	0	8	0	0	0	0	0	0	0	0	0
d__Bacteria	k__norank_d__Bacteria	p__Firmicutes	c__Clostridia	o__Lachnospirales	f__Lachnospiraceae	g__Agathobacter	s__unclassified_g__Agathobacter	ASV418	87	9.84305e-05	0	0	0	0	17	17	46	0	0	7	0	0	0	0	0	0
d__Bacteria	k__norank_d__Bacteria	p__Bacteroidota	c__Bacteroidia	o__Bacteroidales	f__unclassified_o__Bacteroidales	g__unclassified_o__Bacteroidales	s__unclassified_o__Bacteroidales	ASV1630	85	9.61678e-05	0	0	0	85	0	0	0	0	0	0	0	0	0	0	0	0
d__Bacteria	k__norank_d__Bacteria	p__Firmicutes	c__Bacilli	o__Lactobacillales	f__Streptococcaceae	g__Streptococcus	s__unclassified_g__Streptococcus	ASV1632	81	9.16422e-05	0	0	0	81	0	0	0	0	0	0	0	0	0	0	0	0
d__Bacteria	k__norank_d__Bacteria	p__Proteobacteria	c__Gammaproteobacteria	o__Burkholderiales	f__Oxalobacteraceae	g__Massilia	s__unclassified_g__Massilia	ASV1633	84	9.50364e-05	0	0	0	84	0	0	0	0	0	0	0	0	0	0	0	0
d__Bacteria	k__norank_d__Bacteria	p__Proteobacteria	c__Alphaproteobacteria	o__Micropepsales	f__Micropepsaceae	g__norank_f__Micropepsaceae	s__unclassified_g__norank_f__Micropepsaceae	ASV3493	80	9.05108e-05	0	80	0	0	0	0	0	0	0	0	0	0	0	0	0	0
d__Bacteria	k__norank_d__Bacteria	p__Actinobacteriota	c__Actinobacteria	o__Corynebacteriales	f__Nocardiaceae	g__Rhodococcus	s__unclassified_g__Rhodococcus	ASV2177	84	9.50364e-05	43	0	41	0	0	0	0	0	0	0	0	0	0	0	0	0
d__Bacteria	k__norank_d__Bacteria	p__Firmicutes	c__Clostridia	o__Peptostreptococcales-Tissierellales	f__Peptostreptococcaceae	g__Romboutsia	s__unclassified_g__Romboutsia	ASV407	80	9.05108e-05	0	0	23	0	17	26	0	0	0	0	0	0	0	0	14	0
d__Bacteria	k__norank_d__Bacteria	p__Firmicutes	c__Bacilli	o__Lactobacillales	f__Carnobacteriaceae	g__Atopostipes	s__unclassified_g__Atopostipes	ASV2116	76	8.59853e-05	76	0	0	0	0	0	0	0	0	0	0	0	0	0	0	0
d__Bacteria	k__norank_d__Bacteria	p__Proteobacteria	c__Alphaproteobacteria	o__Rhizobiales	f__Methyloligellaceae	g__norank_f__Methyloligellaceae	s__unclassified_g__norank_f__Methyloligellaceae	ASV2113	79	8.93795e-05	79	0	0	0	0	0	0	0	0	0	0	0	0	0	0	0
d__Bacteria	k__norank_d__Bacteria	p__Actinobacteriota	c__Actinobacteria	o__Propionibacteriales	f__Propionibacteriaceae	g__Propionicimonas	s__Propionicimonas_paludicola_g__Propionicimonas	ASV2114	79	8.93795e-05	79	0	0	0	0	0	0	0	0	0	0	0	0	0	0	0
d__Bacteria	k__norank_d__Bacteria	p__Proteobacteria	c__Alphaproteobacteria	o__Rickettsiales	f__Mitochondria	g__norank_f__Mitochondria	s__unclassified_g__norank_f__Mitochondria	ASV1032	83	9.3905e-05	0	0	0	0	0	34	0	0	29	20	0	0	0	0	0	0
d__Bacteria	k__norank_d__Bacteria	p__Firmicutes	c__Bacilli	o__Staphylococcales	f__Staphylococcaceae	g__Staphylococcus	s__unclassified_g__Staphylococcus	ASV2115	79	8.93795e-05	79	0	0	0	0	0	0	0	0	0	0	0	0	0	0	0
d__Bacteria	k__norank_d__Bacteria	p__Proteobacteria	c__Gammaproteobacteria	o__Burkholderiales	f__Burkholderiaceae	g__Burkholderia-Caballeronia-Paraburkholderia	s__unclassified_g__Burkholderia-Caballeronia-Paraburkholderia	ASV3494	85	9.61678e-05	0	85	0	0	0	0	0	0	0	0	0	0	0	0	0	0
d__Bacteria	k__norank_d__Bacteria	p__Proteobacteria	c__Gammaproteobacteria	o__Aeromonadales	f__Aeromonadaceae	g__Aeromonas	s__unclassified_g__Aeromonas	ASV195	80	9.05108e-05	0	0	35	0	8	0	2	0	0	0	0	13	0	4	18	0
d__Bacteria	k__norank_d__Bacteria	p__Firmicutes	c__Clostridia	o__Lachnospirales	f__Lachnospiraceae	g__unclassified_f__Lachnospiraceae	s__unclassified_f__Lachnospiraceae	ASV2441	78	8.82481e-05	0	0	71	0	0	0	0	0	0	0	0	0	7	0	0	0
d__Bacteria	k__norank_d__Bacteria	p__Proteobacteria	c__Gammaproteobacteria	o__Burkholderiales	f__Aquaspirillaceae	g__Rivicola	s__unclassified_g__Rivicola	ASV1636	87	9.84305e-05	0	0	0	87	0	0	0	0	0	0	0	0	0	0	0	0
d__Bacteria	k__norank_d__Bacteria	p__Actinobacteriota	c__Actinobacteria	o__Micrococcales	f__Microbacteriaceae	g__unclassified_f__Microbacteriaceae	s__unclassified_f__Microbacteriaceae	ASV4728	75	8.48539e-05	0	0	0	0	0	0	0	75	0	0	0	0	0	0	0	0
d__Bacteria	k__norank_d__Bacteria	p__Bacteroidota	c__Bacteroidia	o__Bacteroidales	f__Bacteroidaceae	g__Bacteroides	s__unclassified_g__Bacteroides	ASV335	81	9.16422e-05	0	0	0	0	73	0	0	0	0	0	8	0	0	0	0	0
d__Bacteria	k__norank_d__Bacteria	p__Proteobacteria	c__Gammaproteobacteria	o__Burkholderiales	f__Rhodocyclaceae	g__unclassified_f__Rhodocyclaceae	s__unclassified_f__Rhodocyclaceae	ASV1637	82	9.27736e-05	0	0	0	82	0	0	0	0	0	0	0	0	0	0	0	0
d__Bacteria	k__norank_d__Bacteria	p__Firmicutes	c__Bacilli	o__Lactobacillales	f__Carnobacteriaceae	g__Trichococcus	s__unclassified_g__Trichococcus	ASV2117	72	8.14598e-05	72	0	0	0	0	0	0	0	0	0	0	0	0	0	0	0
d__Bacteria	k__norank_d__Bacteria	p__Actinobacteriota	c__Actinobacteria	o__Frankiales	f__Acidothermaceae	g__Acidothermus	s__unclassified_g__Acidothermus	ASV3495	82	9.27736e-05	0	82	0	0	0	0	0	0	0	0	0	0	0	0	0	0
d__Bacteria	k__norank_d__Bacteria	p__Acidobacteriota	c__Acidobacteriae	o__Subgroup_2	f__norank_o__Subgroup_2	g__norank_f__norank_o__Subgroup_2	s__unclassified_g__norank_f__norank_o__Subgroup_2	ASV3496	85	9.61678e-05	0	85	0	0	0	0	0	0	0	0	0	0	0	0	0	0
d__Bacteria	k__norank_d__Bacteria	p__Acidobacteriota	c__Acidobacteriae	o__Bryobacterales	f__Bryobacteraceae	g__Bryobacter	s__unclassified_g__Bryobacter	ASV3497	85	9.61678e-05	0	85	0	0	0	0	0	0	0	0	0	0	0	0	0	0
d__Bacteria	k__norank_d__Bacteria	p__Firmicutes	c__Bacilli	o__Bacillales	f__Bacillaceae	g__Bacillus	s__unclassified_g__Bacillus	ASV1639	85	9.61678e-05	0	0	0	85	0	0	0	0	0	0	0	0	0	0	0	0
d__Bacteria	k__norank_d__Bacteria	p__Proteobacteria	c__Gammaproteobacteria	o__Competibacterales	f__Competibacteraceae	g__Candidatus_Competibacter	s__unclassified_g__Candidatus_Competibacter	ASV2449	77	8.71167e-05	0	0	67	0	0	0	0	10	0	0	0	0	0	0	0	0
d__Bacteria	k__norank_d__Bacteria	p__RCP2-54	c__norank_p__RCP2-54	o__norank_c__norank_p__RCP2-54	f__norank_o__norank_c__norank_p__RCP2-54	g__norank_f__norank_o__norank_c__norank_p__RCP2-54	s__unclassified_g__norank_f__norank_o__norank_c__norank_p__RCP2-54	ASV3498	83	9.3905e-05	0	83	0	0	0	0	0	0	0	0	0	0	0	0	0	0
d__Bacteria	k__norank_d__Bacteria	p__Actinobacteriota	c__Actinobacteria	o__Pseudonocardiales	f__Pseudonocardiaceae	g__unclassified_f__Pseudonocardiaceae	s__unclassified_f__Pseudonocardiaceae	ASV2432	82	9.27736e-05	0	0	82	0	0	0	0	0	0	0	0	0	0	0	0	0
d__Bacteria	k__norank_d__Bacteria	p__Bacteroidota	c__Bacteroidia	o__Bacteroidales	f__unclassified_o__Bacteroidales	g__unclassified_o__Bacteroidales	s__unclassified_o__Bacteroidales	ASV2480	75	8.48539e-05	0	0	54	0	0	0	0	10	0	0	0	11	0	0	0	0
d__Bacteria	k__norank_d__Bacteria	p__Firmicutes	c__Clostridia	o__Lachnospirales	f__Lachnospiraceae	g__unclassified_f__Lachnospiraceae	s__unclassified_f__Lachnospiraceae	ASV361	81	9.16422e-05	0	0	0	0	37	18	19	7	0	0	0	0	0	0	0	0
d__Bacteria	k__norank_d__Bacteria	p__Firmicutes	c__Clostridia	o__Peptostreptococcales-Tissierellales	f__Anaerovoracaceae	g__Anaerovorax	s__unclassified_g__Anaerovorax	ASV2433	76	8.59853e-05	0	0	76	0	0	0	0	0	0	0	0	0	0	0	0	0
d__Bacteria	k__norank_d__Bacteria	p__Bacteroidota	c__Bacteroidia	o__Bacteroidales	f__Dysgonomonadaceae	g__norank_f__Dysgonomonadaceae	s__uncultured_bacterium_g__norank_f__Dysgonomonadaceae	ASV2119	76	8.59853e-05	76	0	0	0	0	0	0	0	0	0	0	0	0	0	0	0
d__Bacteria	k__norank_d__Bacteria	p__Acidobacteriota	c__Acidobacteriae	o__Acidobacteriales	f__norank_o__Acidobacteriales	g__norank_f__norank_o__Acidobacteriales	s__unclassified_g__norank_f__norank_o__Acidobacteriales	ASV3499	87	9.84305e-05	0	87	0	0	0	0	0	0	0	0	0	0	0	0	0	0
d__Bacteria	k__norank_d__Bacteria	p__Proteobacteria	c__Gammaproteobacteria	o__Burkholderiales	f__Comamonadaceae	g__Hydrogenophaga	s__unclassified_g__Hydrogenophaga	ASV2435	79	8.93795e-05	0	0	79	0	0	0	0	0	0	0	0	0	0	0	0	0
d__Bacteria	k__norank_d__Bacteria	p__Cyanobacteria	c__Cyanobacteriia	o__Chloroplast	f__norank_o__Chloroplast	g__norank_f__norank_o__Chloroplast	s__unclassified_g__norank_f__norank_o__Chloroplast	ASV1793	79	8.93795e-05	17	9	9	40	0	0	0	4	0	0	0	0	0	0	0	0
d__Bacteria	k__norank_d__Bacteria	p__Bacteroidota	c__Bacteroidia	o__Bacteroidales	f__Bacteroidaceae	g__Bacteroides	s__Bacteroides_massiliensis	ASV1035	79	8.93795e-05	0	0	0	0	0	29	48	0	0	0	0	0	0	0	0	2
d__Bacteria	k__norank_d__Bacteria	p__Actinobacteriota	c__Actinobacteria	o__Streptosporangiales	f__Nocardiopsaceae	g__Nocardiopsis	s__unclassified_g__Nocardiopsis	ASV2434	72	8.14598e-05	0	0	72	0	0	0	0	0	0	0	0	0	0	0	0	0
d__Bacteria	k__norank_d__Bacteria	p__Acidobacteriota	c__Acidobacteriae	o__Subgroup_2	f__norank_o__Subgroup_2	g__norank_f__norank_o__Subgroup_2	s__uncultured_bacterium_g__norank_f__norank_o__Subgroup_2	ASV3500	83	9.3905e-05	0	83	0	0	0	0	0	0	0	0	0	0	0	0	0	0
d__Bacteria	k__norank_d__Bacteria	p__Proteobacteria	c__Alphaproteobacteria	o__Rhizobiales	f__Beijerinckiaceae	g__Methylobacterium-Methylorubrum	s__unclassified_g__Methylobacterium-Methylorubrum	ASV820	80	9.05108e-05	0	76	0	0	4	0	0	0	0	0	0	0	0	0	0	0
d__Bacteria	k__norank_d__Bacteria	p__Actinobacteriota	c__Actinobacteria	o__Micrococcales	f__Micrococcaceae	g__Kocuria	s__unclassified_g__Kocuria	ASV2121	74	8.37225e-05	74	0	0	0	0	0	0	0	0	0	0	0	0	0	0	0
d__Bacteria	k__norank_d__Bacteria	p__Proteobacteria	c__Gammaproteobacteria	o__Burkholderiales	f__Rhodocyclaceae	g__Candidatus_Accumulibacter	s__unclassified_g__Candidatus_Accumulibacter	ASV2120	71	8.03284e-05	71	0	0	0	0	0	0	0	0	0	0	0	0	0	0	0
d__Bacteria	k__norank_d__Bacteria	p__Acidobacteriota	c__Acidobacteriae	o__Subgroup_2	f__norank_o__Subgroup_2	g__norank_f__norank_o__Subgroup_2	s__uncultured_forest_soil_bacterium_g__norank_f__norank_o__Subgroup_2	ASV3501	80	9.05108e-05	0	80	0	0	0	0	0	0	0	0	0	0	0	0	0	0
d__Bacteria	k__norank_d__Bacteria	p__Proteobacteria	c__Gammaproteobacteria	o__Burkholderiales	f__Rhodocyclaceae	g__Dechloromonas	s__unclassified_g__Dechloromonas	ASV177	85	9.61678e-05	0	0	0	0	0	0	76	0	0	0	4	0	0	5	0	0
d__Bacteria	k__norank_d__Bacteria	p__Firmicutes	c__Clostridia	o__norank_c__Clostridia	f__Hungateiclostridiaceae	g__Saccharofermentans	s__unclassified_g__Saccharofermentans	ASV1657	77	8.71167e-05	0	6	0	71	0	0	0	0	0	0	0	0	0	0	0	0
d__Bacteria	k__norank_d__Bacteria	p__Firmicutes	c__Clostridia	o__Lachnospirales	f__Lachnospiraceae	g__Blautia	s__unclassified_g__Blautia	ASV1642	81	9.16422e-05	0	0	0	81	0	0	0	0	0	0	0	0	0	0	0	0
d__Bacteria	k__norank_d__Bacteria	p__Acidobacteriota	c__Acidobacteriae	o__Subgroup_2	f__norank_o__Subgroup_2	g__norank_f__norank_o__Subgroup_2	s__uncultured_Holophaga_sp._g__norank_f__norank_o__Subgroup_2	ASV3502	81	9.16422e-05	0	81	0	0	0	0	0	0	0	0	0	0	0	0	0	0
d__Bacteria	k__norank_d__Bacteria	p__Actinobacteriota	c__Actinobacteria	o__Micromonosporales	f__Micromonosporaceae	g__unclassified_f__Micromonosporaceae	s__unclassified_f__Micromonosporaceae	ASV2437	72	8.14598e-05	0	0	72	0	0	0	0	0	0	0	0	0	0	0	0	0
d__Bacteria	k__norank_d__Bacteria	p__Bacteroidota	c__Bacteroidia	o__Bacteroidales	f__Dysgonomonadaceae	g__unclassified_f__Dysgonomonadaceae	s__unclassified_f__Dysgonomonadaceae	ASV2438	78	8.82481e-05	0	0	78	0	0	0	0	0	0	0	0	0	0	0	0	0
d__Bacteria	k__norank_d__Bacteria	p__Bacteroidota	c__Bacteroidia	o__Bacteroidales	f__Tannerellaceae	g__Macellibacteroides	s__uncultured_bacterium_g__Macellibacteroides	ASV1131	73	8.25911e-05	0	0	63	0	0	10	0	0	0	0	0	0	0	0	0	0
d__Bacteria	k__norank_d__Bacteria	p__Proteobacteria	c__Gammaproteobacteria	o__Burkholderiales	f__Oxalobacteraceae	g__Massilia	s__unclassified_g__Massilia	ASV1643	78	8.82481e-05	0	0	0	78	0	0	0	0	0	0	0	0	0	0	0	0
d__Bacteria	k__norank_d__Bacteria	p__Proteobacteria	c__Gammaproteobacteria	o__Burkholderiales	f__Comamonadaceae	g__unclassified_f__Comamonadaceae	s__unclassified_f__Comamonadaceae	ASV1664	79	8.93795e-05	0	0	0	68	0	0	0	11	0	0	0	0	0	0	0	0
d__Bacteria	k__norank_d__Bacteria	p__Bacteroidota	c__Bacteroidia	o__Bacteroidales	f__Bacteroidaceae	g__Bacteroides	s__unclassified_g__Bacteroides	ASV381	77	8.71167e-05	0	0	0	0	25	0	49	0	0	0	3	0	0	0	0	0
d__Bacteria	k__norank_d__Bacteria	p__Proteobacteria	c__Gammaproteobacteria	o__Burkholderiales	f__Comamonadaceae	g__unclassified_f__Comamonadaceae	s__unclassified_f__Comamonadaceae	ASV1048	80	9.05108e-05	0	0	0	58	0	22	0	0	0	0	0	0	0	0	0	0
d__Bacteria	k__norank_d__Bacteria	p__Actinobacteriota	c__Actinobacteria	o__Micrococcales	f__Bogoriellaceae	g__Georgenia	s__unclassified_g__Georgenia	ASV1341	74	8.37225e-05	0	0	0	0	0	4	0	70	0	0	0	0	0	0	0	0
d__Bacteria	k__norank_d__Bacteria	p__Firmicutes	c__Bacilli	o__Staphylococcales	f__Staphylococcaceae	g__Staphylococcus	s__unclassified_g__Staphylococcus	ASV2123	73	8.25911e-05	73	0	0	0	0	0	0	0	0	0	0	0	0	0	0	0
d__Bacteria	k__norank_d__Bacteria	p__Bacteroidota	c__Bacteroidia	o__Bacteroidales	f__Tannerellaceae	g__Parabacteroides	s__Parabacteroides_johnsonii_DSM_18315	ASV370	76	8.59853e-05	0	0	0	0	28	0	42	5	1	0	0	0	0	0	0	0
d__Bacteria	k__norank_d__Bacteria	p__Proteobacteria	c__Gammaproteobacteria	o__Burkholderiales	f__Comamonadaceae	g__Sphaerotilus	s__unclassified_g__Sphaerotilus	ASV1645	81	9.16422e-05	0	0	0	81	0	0	0	0	0	0	0	0	0	0	0	0
d__Bacteria	k__norank_d__Bacteria	p__Proteobacteria	c__Alphaproteobacteria	o__Elsterales	f__norank_o__Elsterales	g__norank_f__norank_o__Elsterales	s__uncultured_bacterium_g__norank_f__norank_o__Elsterales	ASV3503	80	9.05108e-05	0	80	0	0	0	0	0	0	0	0	0	0	0	0	0	0
d__Bacteria	k__norank_d__Bacteria	p__Proteobacteria	c__Gammaproteobacteria	o__Burkholderiales	f__Hydrogenophilaceae	g__Tepidiphilus	s__uncultured_bacterium_g__Tepidiphilus	ASV1648	78	8.82481e-05	0	0	0	78	0	0	0	0	0	0	0	0	0	0	0	0
d__Bacteria	k__norank_d__Bacteria	p__Nitrospirota	c__Nitrospiria	o__Nitrospirales	f__Nitrospiraceae	g__Nitrospira	s__unclassified_g__Nitrospira	ASV285	73	8.25911e-05	0	0	67	0	0	0	0	0	0	0	0	5	0	1	0	0
d__Bacteria	k__norank_d__Bacteria	p__Actinobacteriota	c__Actinobacteria	o__Kineosporiales	f__Kineosporiaceae	g__Kineococcus	s__unclassified_g__Kineococcus	ASV3683	79	8.93795e-05	0	39	0	0	0	0	0	0	40	0	0	0	0	0	0	0
d__Bacteria	k__norank_d__Bacteria	p__Bacteroidota	c__Bacteroidia	o__Sphingobacteriales	f__Sphingobacteriaceae	g__Sphingobacterium	s__unclassified_g__Sphingobacterium	ASV1835	77	8.71167e-05	33	0	0	38	0	0	3	3	0	0	0	0	0	0	0	0
d__Bacteria	k__norank_d__Bacteria	p__Firmicutes	c__Clostridia	o__Peptostreptococcales-Tissierellales	f__Anaerovoracaceae	g__unclassified_f__Anaerovoracaceae	s__unclassified_f__Anaerovoracaceae	ASV2469	70	7.9197e-05	0	10	60	0	0	0	0	0	0	0	0	0	0	0	0	0
d__Bacteria	k__norank_d__Bacteria	p__Proteobacteria	c__Alphaproteobacteria	o__Acetobacterales	f__Acetobacteraceae	g__Acetobacter	s__unclassified_g__Acetobacter	ASV2439	74	8.37225e-05	0	0	74	0	0	0	0	0	0	0	0	0	0	0	0	0
d__Bacteria	k__norank_d__Bacteria	p__Bacteroidota	c__Bacteroidia	o__Flavobacteriales	f__Flavobacteriaceae	g__Flavobacterium	s__unclassified_g__Flavobacterium	ASV1647	77	8.71167e-05	0	0	0	77	0	0	0	0	0	0	0	0	0	0	0	0
d__Bacteria	k__norank_d__Bacteria	p__Bacteroidota	c__Bacteroidia	o__Flavobacteriales	f__Weeksellaceae	g__Chryseobacterium	s__unclassified_g__Chryseobacterium	ASV81	71	8.03284e-05	0	0	0	0	0	11	25	0	0	0	0	0	0	7	28	0
d__Bacteria	k__norank_d__Bacteria	p__Proteobacteria	c__Gammaproteobacteria	o__Burkholderiales	f__Comamonadaceae	g__unclassified_f__Comamonadaceae	s__unclassified_f__Comamonadaceae	ASV1668	74	8.37225e-05	0	0	0	66	0	0	0	0	0	0	5	3	0	0	0	0
d__Bacteria	k__norank_d__Bacteria	p__Nitrospirota	c__Thermodesulfovibrionia	o__norank_c__Thermodesulfovibrionia	f__norank_o__norank_c__Thermodesulfovibrionia	g__norank_f__norank_o__norank_c__Thermodesulfovibrionia	s__unclassified_g__norank_f__norank_o__norank_c__Thermodesulfovibrionia	ASV2149	73	8.25911e-05	53	0	0	0	0	0	0	0	0	0	0	0	0	0	0	20
d__Bacteria	k__norank_d__Bacteria	p__Proteobacteria	c__Gammaproteobacteria	o__Burkholderiales	f__Comamonadaceae	g__unclassified_f__Comamonadaceae	s__unclassified_f__Comamonadaceae	ASV2440	72	8.14598e-05	0	0	72	0	0	0	0	0	0	0	0	0	0	0	0	0
d__Bacteria	k__norank_d__Bacteria	p__Actinobacteriota	c__Actinobacteria	o__Corynebacteriales	f__Corynebacteriaceae	g__Corynebacterium	s__unclassified_g__Corynebacterium	ASV1226	80	9.05108e-05	0	0	56	0	0	8	0	9	0	0	0	7	0	0	0	0
d__Bacteria	k__norank_d__Bacteria	p__Proteobacteria	c__Alphaproteobacteria	o__Rhodobacterales	f__Rhodobacteraceae	g__Paracoccus	s__Paracoccus_alimentarius	ASV1795	80	9.05108e-05	34	0	0	43	0	0	0	0	0	0	0	3	0	0	0	0
d__Bacteria	k__norank_d__Bacteria	p__Proteobacteria	c__Alphaproteobacteria	o__Rhizobiales	f__Devosiaceae	g__Devosia	s__Devosia_limi	ASV2124	73	8.25911e-05	73	0	0	0	0	0	0	0	0	0	0	0	0	0	0	0
d__Bacteria	k__norank_d__Bacteria	p__Actinobacteriota	c__Thermoleophilia	o__Gaiellales	f__norank_o__Gaiellales	g__norank_f__norank_o__Gaiellales	s__unclassified_g__norank_f__norank_o__Gaiellales	ASV3504	75	8.48539e-05	0	75	0	0	0	0	0	0	0	0	0	0	0	0	0	0
d__Bacteria	k__norank_d__Bacteria	p__Firmicutes	c__Clostridia	o__Lachnospirales	f__Lachnospiraceae	g__Blautia	s__Blautia_wexlerae	ASV1684	80	9.05108e-05	0	0	0	66	0	0	14	0	0	0	0	0	0	0	0	0
d__Bacteria	k__norank_d__Bacteria	p__Actinobacteriota	c__Acidimicrobiia	o__IMCC26256	f__norank_o__IMCC26256	g__norank_f__norank_o__IMCC26256	s__Aciditerrimonas_sp.	ASV3505	80	9.05108e-05	0	80	0	0	0	0	0	0	0	0	0	0	0	0	0	0
d__Bacteria	k__norank_d__Bacteria	p__Acidobacteriota	c__Acidobacteriae	o__Acidobacteriales	f__norank_o__Acidobacteriales	g__norank_f__norank_o__Acidobacteriales	s__uncultured_forest_soil_bacterium_g__norank_f__norank_o__Acidobacteriales	ASV3506	81	9.16422e-05	0	81	0	0	0	0	0	0	0	0	0	0	0	0	0	0
d__Bacteria	k__norank_d__Bacteria	p__Firmicutes	c__Clostridia	o__Oscillospirales	f__Ruminococcaceae	g__Eubacterium_siraeum_group	s__unclassified_g__Eubacterium_siraeum_group	ASV401	75	8.48539e-05	0	0	0	0	21	10	29	5	3	0	0	7	0	0	0	0
d__Bacteria	k__norank_d__Bacteria	p__Actinobacteriota	c__Actinobacteria	o__Propionibacteriales	f__Nocardioidaceae	g__Nocardioides	s__unclassified_g__Nocardioides	ASV1650	73	8.25911e-05	0	0	0	73	0	0	0	0	0	0	0	0	0	0	0	0
d__Bacteria	k__norank_d__Bacteria	p__Firmicutes	c__Clostridia	o__Lachnospirales	f__Lachnospiraceae	g__Eubacterium_ruminantium_group	s__uncultured_bacterium_g__Eubacterium_ruminantium_group	ASV2442	71	8.03284e-05	0	0	71	0	0	0	0	0	0	0	0	0	0	0	0	0
d__Bacteria	k__norank_d__Bacteria	p__Proteobacteria	c__Gammaproteobacteria	o__Steroidobacterales	f__Steroidobacteraceae	g__norank_f__Steroidobacteraceae	s__unclassified_g__norank_f__Steroidobacteraceae	ASV1649	79	8.93795e-05	0	0	0	79	0	0	0	0	0	0	0	0	0	0	0	0
d__Bacteria	k__norank_d__Bacteria	p__Desulfobacterota	c__Desulfovibrionia	o__Desulfovibrionales	f__Desulfomicrobiaceae	g__Desulfomicrobium	s__unclassified_g__Desulfomicrobium	ASV1678	69	7.80656e-05	0	0	0	61	0	0	0	0	0	0	8	0	0	0	0	0
d__Bacteria	k__norank_d__Bacteria	p__Firmicutes	c__Bacilli	o__Bacillales	f__Bacillaceae	g__Bacillus	s__Bacillaceae_bacterium_mt8	ASV1653	76	8.59853e-05	0	0	0	76	0	0	0	0	0	0	0	0	0	0	0	0
d__Bacteria	k__norank_d__Bacteria	p__Actinobacteriota	c__Actinobacteria	o__Frankiales	f__unclassified_o__Frankiales	g__unclassified_o__Frankiales	s__unclassified_o__Frankiales	ASV1652	72	8.14598e-05	0	0	0	72	0	0	0	0	0	0	0	0	0	0	0	0
d__Bacteria	k__norank_d__Bacteria	p__Actinobacteriota	c__Thermoleophilia	o__Gaiellales	f__norank_o__Gaiellales	g__norank_f__norank_o__Gaiellales	s__uncultured_microorganism_g__norank_f__norank_o__Gaiellales	ASV1654	77	8.71167e-05	0	0	0	77	0	0	0	0	0	0	0	0	0	0	0	0
d__Bacteria	k__norank_d__Bacteria	p__Actinobacteriota	c__Actinobacteria	o__Corynebacteriales	f__Mycobacteriaceae	g__Mycobacterium	s__unclassified_g__Mycobacterium	ASV3510	79	8.93795e-05	0	79	0	0	0	0	0	0	0	0	0	0	0	0	0	0
d__Bacteria	k__norank_d__Bacteria	p__Bacteroidota	c__Bacteroidia	o__Bacteroidales	f__Bacteroidaceae	g__Bacteroides	s__unclassified_g__Bacteroides	ASV363	71	8.03284e-05	0	0	0	0	33	0	0	7	0	0	0	0	0	0	31	0
d__Bacteria	k__norank_d__Bacteria	p__Proteobacteria	c__Gammaproteobacteria	o__Gammaproteobacteria_Incertae_Sedis	f__unclassified_o__Gammaproteobacteria_Incertae_Sedis	g__Acidibacter	s__unclassified_g__Acidibacter	ASV3511	76	8.59853e-05	0	76	0	0	0	0	0	0	0	0	0	0	0	0	0	0
d__Bacteria	k__norank_d__Bacteria	p__Proteobacteria	c__Alphaproteobacteria	o__Rhizobiales	f__Xanthobacteraceae	g__norank_f__Xanthobacteraceae	s__uncultured_forest_soil_bacterium_g__norank_f__Xanthobacteraceae	ASV3507	76	8.59853e-05	0	76	0	0	0	0	0	0	0	0	0	0	0	0	0	0
d__Bacteria	k__norank_d__Bacteria	p__Actinobacteriota	c__Actinobacteria	o__Micrococcales	f__Micrococcaceae	g__unclassified_f__Micrococcaceae	s__unclassified_f__Micrococcaceae	ASV2125	69	7.80656e-05	69	0	0	0	0	0	0	0	0	0	0	0	0	0	0	0
d__Bacteria	k__norank_d__Bacteria	p__Proteobacteria	c__Alphaproteobacteria	o__Sphingomonadales	f__Sphingomonadaceae	g__Sphingomonas	s__unclassified_g__Sphingomonas	ASV3508	76	8.59853e-05	0	76	0	0	0	0	0	0	0	0	0	0	0	0	0	0
d__Bacteria	k__norank_d__Bacteria	p__Firmicutes	c__Clostridia	o__Clostridiales	f__Clostridiaceae	g__Proteiniclasticum	s__unclassified_g__Proteiniclasticum	ASV1660	72	8.14598e-05	0	0	0	72	0	0	0	0	0	0	0	0	0	0	0	0
d__Bacteria	k__norank_d__Bacteria	p__Proteobacteria	c__Alphaproteobacteria	o__Caulobacterales	f__Caulobacteraceae	g__Brevundimonas	s__unclassified_g__Brevundimonas	ASV3183	70	7.9197e-05	0	35	0	0	0	0	6	25	0	0	0	0	4	0	0	0
d__Bacteria	k__norank_d__Bacteria	p__Bacteroidota	c__Bacteroidia	o__Bacteroidales	f__Paludibacteraceae	g__Paludibacter	s__unclassified_g__Paludibacter	ASV2444	73	8.25911e-05	0	0	73	0	0	0	0	0	0	0	0	0	0	0	0	0
d__Bacteria	k__norank_d__Bacteria	p__Firmicutes	c__Clostridia	o__Clostridiales	f__Clostridiaceae	g__Clostridium_sensu_stricto_1	s__unclassified_g__Clostridium_sensu_stricto_1	ASV2443	72	8.14598e-05	0	0	72	0	0	0	0	0	0	0	0	0	0	0	0	0
d__Bacteria	k__norank_d__Bacteria	p__Proteobacteria	c__Gammaproteobacteria	o__Beggiatoales	f__Beggiatoaceae	g__Beggiatoa	s__Beggiatoa_sp._1401-13	ASV1855	75	8.48539e-05	0	0	38	37	0	0	0	0	0	0	0	0	0	0	0	0
d__Bacteria	k__norank_d__Bacteria	p__Acidobacteriota	c__Acidobacteriae	o__Acidobacteriales	f__Acidobacteriaceae_Subgroup_1	g__norank_f__Acidobacteriaceae_Subgroup_1	s__Acidobacteria_bacterium_AB60	ASV3512	72	8.14598e-05	0	72	0	0	0	0	0	0	0	0	0	0	0	0	0	0
d__Bacteria	k__norank_d__Bacteria	p__Actinobacteriota	c__Actinobacteria	o__Bifidobacteriales	f__Bifidobacteriaceae	g__Bifidobacterium	s__Bifidobacterium_subtile	ASV2451	75	8.48539e-05	0	0	72	0	0	0	0	0	0	3	0	0	0	0	0	0
d__Bacteria	k__norank_d__Bacteria	p__Bacteroidota	c__Bacteroidia	o__Bacteroidales	f__Tannerellaceae	g__Macellibacteroides	s__unclassified_g__Macellibacteroides	ASV2447	69	7.80656e-05	0	0	69	0	0	0	0	0	0	0	0	0	0	0	0	0
d__Bacteria	k__norank_d__Bacteria	p__Myxococcota	c__Polyangia	o__Polyangiales	f__Sandaracinaceae	g__Sandaracinus	s__unclassified_g__Sandaracinus	ASV4729	71	8.03284e-05	0	0	0	0	0	0	0	71	0	0	0	0	0	0	0	0
d__Bacteria	k__norank_d__Bacteria	p__Firmicutes	c__Clostridia	o__Lachnospirales	f__Lachnospiraceae	g__Lachnoclostridium	s__unclassified_g__Lachnoclostridium	ASV2446	69	7.80656e-05	0	0	69	0	0	0	0	0	0	0	0	0	0	0	0	0
d__Bacteria	k__norank_d__Bacteria	p__Bacteroidota	c__Bacteroidia	o__Bacteroidales	f__Bacteroidaceae	g__Bacteroides	s__Bacteroides_graminisolvens	ASV2448	75	8.48539e-05	0	0	75	0	0	0	0	0	0	0	0	0	0	0	0	0
d__Bacteria	k__norank_d__Bacteria	p__Bacteroidota	c__Bacteroidia	o__Bacteroidales	f__Bacteroidaceae	g__Bacteroides	s__unclassified_g__Bacteroides	ASV1877	75	8.48539e-05	0	0	0	29	0	0	46	0	0	0	0	0	0	0	0	0
d__Bacteria	k__norank_d__Bacteria	p__Actinobacteriota	c__Acidimicrobiia	o__norank_c__Acidimicrobiia	f__norank_o__norank_c__Acidimicrobiia	g__norank_f__norank_o__norank_c__Acidimicrobiia	s__unclassified_g__norank_f__norank_o__norank_c__Acidimicrobiia	ASV631	70	7.9197e-05	0	63	0	0	5	0	0	0	0	0	2	0	0	0	0	0
d__Bacteria	k__norank_d__Bacteria	p__Actinobacteriota	c__Actinobacteria	o__Micrococcales	f__Microbacteriaceae	g__Microbacterium	s__unclassified_g__Microbacterium	ASV2445	71	8.03284e-05	0	0	71	0	0	0	0	0	0	0	0	0	0	0	0	0
d__Bacteria	k__norank_d__Bacteria	p__Firmicutes	c__Clostridia	o__Oscillospirales	f__Ruminococcaceae	g__Eubacterium_siraeum_group	s__unclassified_g__Eubacterium_siraeum_group	ASV70	73	8.25911e-05	0	0	0	0	60	0	0	0	0	0	0	5	0	8	0	0
d__Bacteria	k__norank_d__Bacteria	p__Firmicutes	c__Bacilli	o__Lactobacillales	f__Leuconostocaceae	g__Weissella	s__Weissella_ghanensis	ASV1390	71	8.03284e-05	0	0	0	0	0	3	43	10	0	0	0	7	0	0	8	0
d__Bacteria	k__norank_d__Bacteria	p__Proteobacteria	c__Gammaproteobacteria	o__Burkholderiales	f__Oxalobacteraceae	g__Massilia	s__unclassified_g__Massilia	ASV706	68	7.69342e-05	64	0	0	0	4	0	0	0	0	0	0	0	0	0	0	0
d__Bacteria	k__norank_d__Bacteria	p__Acidobacteriota	c__Acidobacteriae	o__Acidobacteriales	f__norank_o__Acidobacteriales	g__norank_f__norank_o__Acidobacteriales	s__unclassified_g__norank_f__norank_o__Acidobacteriales	ASV3514	74	8.37225e-05	0	74	0	0	0	0	0	0	0	0	0	0	0	0	0	0
d__Bacteria	k__norank_d__Bacteria	p__Bacteroidota	c__Bacteroidia	o__Bacteroidales	f__Bacteroidaceae	g__Bacteroides	s__Bacteroides_plebeius	ASV510	67	7.58028e-05	0	0	0	0	9	52	0	0	6	0	0	0	0	0	0	0
d__Bacteria	k__norank_d__Bacteria	p__Proteobacteria	c__Alphaproteobacteria	o__Rhizobiales	f__Beijerinckiaceae	g__norank_f__Beijerinckiaceae	s__uncultured_forest_soil_bacterium_g__norank_f__Beijerinckiaceae	ASV3515	74	8.37225e-05	0	74	0	0	0	0	0	0	0	0	0	0	0	0	0	0
d__Bacteria	k__norank_d__Bacteria	p__Actinobacteriota	c__Actinobacteria	o__Propionibacteriales	f__Nocardioidaceae	g__Nocardioides	s__unclassified_g__Nocardioides	ASV1191	73	8.25911e-05	0	0	0	56	0	8	9	0	0	0	0	0	0	0	0	0
d__Bacteria	k__norank_d__Bacteria	p__Proteobacteria	c__Alphaproteobacteria	o__Rhizobiales	f__Xanthobacteraceae	g__Bradyrhizobium	s__unclassified_g__Bradyrhizobium	ASV3516	71	8.03284e-05	0	71	0	0	0	0	0	0	0	0	0	0	0	0	0	0
d__Bacteria	k__norank_d__Bacteria	p__Firmicutes	c__Bacilli	o__Lactobacillales	f__Lactobacillaceae	g__Lactobacillus	s__Lactobacillus_aviarius	ASV1768	74	8.37225e-05	0	21	0	48	0	0	0	5	0	0	0	0	0	0	0	0
d__Bacteria	k__norank_d__Bacteria	p__Firmicutes	c__Clostridia	o__Oscillospirales	f__Eubacterium_coprostanoligenes_group	g__norank_f__Eubacterium_coprostanoligenes_group	s__unclassified_g__norank_f__Eubacterium_coprostanoligenes_group	ASV509	64	7.24087e-05	0	0	0	0	9	11	31	13	0	0	0	0	0	0	0	0
d__Bacteria	k__norank_d__Bacteria	p__Proteobacteria	c__Gammaproteobacteria	o__Burkholderiales	f__Rhodocyclaceae	g__unclassified_f__Rhodocyclaceae	s__unclassified_f__Rhodocyclaceae	ASV2455	67	7.58028e-05	0	0	65	0	0	0	0	0	0	0	0	0	0	0	2	0
d__Bacteria	k__norank_d__Bacteria	p__Bacteroidota	c__Bacteroidia	o__Bacteroidales	f__Tannerellaceae	g__Macellibacteroides	s__uncultured_bacterium_g__Macellibacteroides	ASV1091	70	7.9197e-05	0	41	16	0	0	13	0	0	0	0	0	0	0	0	0	0
d__Bacteria	k__norank_d__Bacteria	p__Acidobacteriota	c__Acidobacteriae	o__Acidobacteriales	f__norank_o__Acidobacteriales	g__norank_f__norank_o__Acidobacteriales	s__unclassified_g__norank_f__norank_o__Acidobacteriales	ASV3513	72	8.14598e-05	0	72	0	0	0	0	0	0	0	0	0	0	0	0	0	0
d__Bacteria	k__norank_d__Bacteria	p__Proteobacteria	c__Gammaproteobacteria	o__Gammaproteobacteria_Incertae_Sedis	f__unclassified_o__Gammaproteobacteria_Incertae_Sedis	g__Acidibacter	s__unclassified_g__Acidibacter	ASV3517	72	8.14598e-05	0	72	0	0	0	0	0	0	0	0	0	0	0	0	0	0
d__Bacteria	k__norank_d__Bacteria	p__Firmicutes	c__Bacilli	o__Bacillales	f__Bacillaceae	g__Bacillus	s__unclassified_g__Bacillus	ASV818	69	7.80656e-05	0	0	56	0	4	0	0	0	0	0	9	0	0	0	0	0
d__Bacteria	k__norank_d__Bacteria	p__Acidobacteriota	c__Acidobacteriae	o__Subgroup_13	f__norank_o__Subgroup_13	g__norank_f__norank_o__Subgroup_13	s__uncultured_Acidobacteria_bacterium_g__norank_f__norank_o__Subgroup_13	ASV3518	71	8.03284e-05	0	71	0	0	0	0	0	0	0	0	0	0	0	0	0	0
d__Bacteria	k__norank_d__Bacteria	p__Bacteroidota	c__Bacteroidia	o__Bacteroidales	f__Paludibacteraceae	g__Paludibacter	s__unclassified_g__Paludibacter	ASV652	71	8.03284e-05	0	40	0	0	5	9	0	0	10	0	7	0	0	0	0	0
d__Bacteria	k__norank_d__Bacteria	p__Firmicutes	c__Clostridia	o__Christensenellales	f__Christensenellaceae	g__Christensenellaceae_R-7_group	s__bacterium_enrichment_culture_clone_DPF35	ASV2452	65	7.35401e-05	0	0	65	0	0	0	0	0	0	0	0	0	0	0	0	0
d__Bacteria	k__norank_d__Bacteria	p__Entotheonellaeota	c__Entotheonellia	o__Entotheonellales	f__Entotheonellaceae	g__norank_f__Entotheonellaceae	s__unclassified_g__norank_f__Entotheonellaceae	ASV1662	71	8.03284e-05	0	0	0	71	0	0	0	0	0	0	0	0	0	0	0	0
d__Bacteria	k__norank_d__Bacteria	p__Bacteroidota	c__Bacteroidia	o__Bacteroidales	f__Prolixibacteraceae	g__WCHB1-32	s__uncultured_soil_bacterium_g__WCHB1-32	ASV1663	70	7.9197e-05	0	0	0	70	0	0	0	0	0	0	0	0	0	0	0	0
d__Bacteria	k__norank_d__Bacteria	p__Bacteroidota	c__Kapabacteria	o__Kapabacteriales	f__norank_o__Kapabacteriales	g__norank_f__norank_o__Kapabacteriales	s__bacterium_enrichment_culture_clone_M624	ASV2465	65	7.35401e-05	0	0	61	0	0	0	0	0	0	0	0	0	0	0	4	0
d__Bacteria	k__norank_d__Bacteria	p__Firmicutes	c__Bacilli	o__Lactobacillales	f__Lactobacillaceae	g__Lactobacillus	s__unclassified_g__Lactobacillus	ASV413	66	7.46714e-05	0	0	0	0	19	11	32	0	4	0	0	0	0	0	0	0
d__Bacteria	k__norank_d__Bacteria	p__Proteobacteria	c__Gammaproteobacteria	o__Beggiatoales	f__Beggiatoaceae	g__norank_f__Beggiatoaceae	s__uncultured_gamma_proteobacterium_g__norank_f__Beggiatoaceae	ASV668	66	7.46714e-05	0	0	0	0	4	3	38	13	0	0	4	0	0	0	4	0
d__Bacteria	k__norank_d__Bacteria	p__Proteobacteria	c__Gammaproteobacteria	o__Pseudomonadales	f__Pseudomonadaceae	g__Pseudomonas	s__unclassified_g__Pseudomonas	ASV2127	62	7.01459e-05	62	0	0	0	0	0	0	0	0	0	0	0	0	0	0	0
d__Bacteria	k__norank_d__Bacteria	p__Actinobacteriota	c__Actinobacteria	o__Micrococcales	f__Microbacteriaceae	g__Microbacterium	s__unclassified_g__Microbacterium	ASV1464	62	7.01459e-05	59	0	0	0	0	3	0	0	0	0	0	0	0	0	0	0
d__Bacteria	k__norank_d__Bacteria	p__Bacteroidota	c__Bacteroidia	o__Bacteroidales	f__Paludibacteraceae	g__Paludibacter	s__unclassified_g__Paludibacter	ASV2453	64	7.24087e-05	0	0	64	0	0	0	0	0	0	0	0	0	0	0	0	0
d__Bacteria	k__norank_d__Bacteria	p__Acidobacteriota	c__Acidobacteriae	o__Acidobacteriales	f__norank_o__Acidobacteriales	g__norank_f__norank_o__Acidobacteriales	s__unclassified_g__norank_f__norank_o__Acidobacteriales	ASV3521	74	8.37225e-05	0	74	0	0	0	0	0	0	0	0	0	0	0	0	0	0
d__Bacteria	k__norank_d__Bacteria	p__Actinobacteriota	c__Actinobacteria	o__Frankiales	f__Acidothermaceae	g__Acidothermus	s__unclassified_g__Acidothermus	ASV3519	73	8.25911e-05	0	73	0	0	0	0	0	0	0	0	0	0	0	0	0	0
d__Bacteria	k__norank_d__Bacteria	p__Actinobacteriota	c__Actinobacteria	o__Frankiales	f__Acidothermaceae	g__Acidothermus	s__unclassified_g__Acidothermus	ASV3520	71	8.03284e-05	0	71	0	0	0	0	0	0	0	0	0	0	0	0	0	0
d__Bacteria	k__norank_d__Bacteria	p__Proteobacteria	c__Alphaproteobacteria	o__Rhizobiales	f__Beijerinckiaceae	g__Methylobacterium-Methylorubrum	s__unclassified_g__Methylobacterium-Methylorubrum	ASV2459	68	7.69342e-05	0	0	66	0	0	0	0	2	0	0	0	0	0	0	0	0
d__Bacteria	k__norank_d__Bacteria	p__Proteobacteria	c__Gammaproteobacteria	o__Enterobacterales	f__Enterobacteriaceae	g__Enterobacter	s__unclassified_g__Enterobacter	ASV2128	68	7.69342e-05	68	0	0	0	0	0	0	0	0	0	0	0	0	0	0	0
d__Bacteria	k__norank_d__Bacteria	p__Proteobacteria	c__Alphaproteobacteria	o__Rhizobiales	f__Xanthobacteraceae	g__norank_f__Xanthobacteraceae	s__unclassified_g__norank_f__Xanthobacteraceae	ASV3523	73	8.25911e-05	0	73	0	0	0	0	0	0	0	0	0	0	0	0	0	0
d__Bacteria	k__norank_d__Bacteria	p__Proteobacteria	c__Alphaproteobacteria	o__Rhizobiales	f__Beijerinckiaceae	g__unclassified_f__Beijerinckiaceae	s__unclassified_f__Beijerinckiaceae	ASV1671	71	8.03284e-05	0	0	0	69	0	0	0	0	0	0	0	0	2	0	0	0
d__Bacteria	k__norank_d__Bacteria	p__Acidobacteriota	c__Acidobacteriae	o__Acidobacteriales	f__Acidobacteriaceae_Subgroup_1	g__Terracidiphilus	s__unclassified_g__Terracidiphilus	ASV2456	64	7.24087e-05	0	0	64	0	0	0	0	0	0	0	0	0	0	0	0	0
d__Bacteria	k__norank_d__Bacteria	p__Bacteroidota	c__Bacteroidia	o__Bacteroidales	f__Rikenellaceae	g__Bact-08	s__unclassified_g__Bact-08	ASV2454	64	7.24087e-05	0	0	64	0	0	0	0	0	0	0	0	0	0	0	0	0
d__Bacteria	k__norank_d__Bacteria	p__Bacteroidota	c__Bacteroidia	o__Chitinophagales	f__Saprospiraceae	g__norank_f__Saprospiraceae	s__uncultured_Saprospiraceae_bacterium_g__norank	ASV1281	67	7.58028e-05	0	0	53	0	0	5	0	9	0	0	0	0	0	0	0	0
d__Bacteria	k__norank_d__Bacteria	p__Bacteroidota	c__Bacteroidia	o__Bacteroidales	f__Tannerellaceae	g__Macellibacteroides	s__unclassified_g__Macellibacteroides	ASV2457	68	7.69342e-05	0	0	68	0	0	0	0	0	0	0	0	0	0	0	0	0
d__Bacteria	k__norank_d__Bacteria	p__Proteobacteria	c__Alphaproteobacteria	o__Rhizobiales	f__Xanthobacteraceae	g__norank_f__Xanthobacteraceae	s__unclassified_g__norank_f__Xanthobacteraceae	ASV3522	68	7.69342e-05	0	68	0	0	0	0	0	0	0	0	0	0	0	0	0	0
d__Bacteria	k__norank_d__Bacteria	p__Proteobacteria	c__Gammaproteobacteria	o__Xanthomonadales	f__Xanthomonadaceae	g__unclassified_f__Xanthomonadaceae	s__unclassified_f__Xanthomonadaceae	ASV2130	63	7.12773e-05	63	0	0	0	0	0	0	0	0	0	0	0	0	0	0	0
d__Bacteria	k__norank_d__Bacteria	p__Proteobacteria	c__Alphaproteobacteria	o__Rhizobiales	f__Xanthobacteraceae	g__Rhodoplanes	s__unclassified_g__Rhodoplanes	ASV2131	59	6.67517e-05	59	0	0	0	0	0	0	0	0	0	0	0	0	0	0	0
d__Bacteria	k__norank_d__Bacteria	p__Firmicutes	c__Clostridia	o__Clostridiales	f__Clostridiaceae	g__Clostridium_sensu_stricto_1	s__unclassified_g__Clostridium_sensu_stricto_1	ASV4743	65	7.35401e-05	0	0	0	0	0	0	0	35	0	0	0	0	0	0	11	19
d__Bacteria	k__norank_d__Bacteria	p__Actinobacteriota	c__Actinobacteria	o__Micrococcales	f__Microbacteriaceae	g__Microbacterium	s__unclassified_g__Microbacterium	ASV1987	67	7.58028e-05	0	0	53	7	0	0	0	4	0	0	0	0	0	0	0	3
d__Bacteria	k__norank_d__Bacteria	p__Proteobacteria	c__Gammaproteobacteria	o__Burkholderiales	f__Oxalobacteraceae	g__Massilia	s__unclassified_g__Massilia	ASV1665	73	8.25911e-05	0	0	0	73	0	0	0	0	0	0	0	0	0	0	0	0
d__Bacteria	k__norank_d__Bacteria	p__PAUC34f	c__norank_p__PAUC34f	o__norank_c__norank_p__PAUC34f	f__norank_o__norank_c__norank_p__PAUC34f	g__norank_f__norank_o__norank_c__norank_p__PAUC34f	s__uncultured_bacterium_g__norank_f__norank_o__norank_c__norank_p__PAUC34f	ASV1666	70	7.9197e-05	0	0	0	70	0	0	0	0	0	0	0	0	0	0	0	0
d__Bacteria	k__norank_d__Bacteria	p__Firmicutes	c__Bacilli	o__Exiguobacterales	f__Exiguobacteraceae	g__Exiguobacterium	s__unclassified_g__Exiguobacterium	ASV1669	66	7.46714e-05	0	0	0	66	0	0	0	0	0	0	0	0	0	0	0	0
d__Bacteria	k__norank_d__Bacteria	p__Deinococcota	c__Deinococci	o__Deinococcales	f__Deinococcaceae	g__Deinococcus	s__unclassified_g__Deinococcus	ASV671	64	7.24087e-05	0	0	0	55	4	2	0	3	0	0	0	0	0	0	0	0
d__Bacteria	k__norank_d__Bacteria	p__Desulfobacterota	c__unclassified_p__Desulfobacterota	o__unclassified_p__Desulfobacterota	f__unclassified_p__Desulfobacterota	g__unclassified_p__Desulfobacterota	s__unclassified_p__Desulfobacterota	ASV1703	68	7.69342e-05	0	9	0	59	0	0	0	0	0	0	0	0	0	0	0	0
d__Bacteria	k__norank_d__Bacteria	p__Actinobacteriota	c__Actinobacteria	o__Corynebacteriales	f__Mycobacteriaceae	g__Mycobacterium	s__unclassified_g__Mycobacterium	ASV3524	72	8.14598e-05	0	72	0	0	0	0	0	0	0	0	0	0	0	0	0	0
d__Bacteria	k__norank_d__Bacteria	p__Bacteroidota	c__Bacteroidia	o__Bacteroidales	f__Prevotellaceae	g__unclassified_f__Prevotellaceae	s__unclassified_f__Prevotellaceae	ASV2458	60	6.78831e-05	0	0	60	0	0	0	0	0	0	0	0	0	0	0	0	0
d__Bacteria	k__norank_d__Bacteria	p__unclassified_k__norank_d__Bacteria	c__unclassified_k__norank_d__Bacteria	o__unclassified_k__norank_d__Bacteria	f__unclassified_k__norank_d__Bacteria	g__unclassified_k__norank_d__Bacteria	s__unclassified_k__norank_d__Bacteria	ASV2460	69	7.80656e-05	0	0	69	0	0	0	0	0	0	0	0	0	0	0	0	0
d__Bacteria	k__norank_d__Bacteria	p__Proteobacteria	c__Gammaproteobacteria	o__Pseudomonadales	f__Pseudomonadaceae	g__Pseudomonas	s__unclassified_g__Pseudomonas	ASV4751	62	7.01459e-05	0	0	0	0	0	0	0	29	0	0	0	15	3	0	15	0
d__Bacteria	k__norank_d__Bacteria	p__Bacteroidota	c__Bacteroidia	o__Bacteroidales	f__Barnesiellaceae	g__Barnesiella	s__unclassified_g__Barnesiella	ASV451	71	8.03284e-05	0	0	0	0	13	11	39	8	0	0	0	0	0	0	0	0
d__Bacteria	k__norank_d__Bacteria	p__Bacteroidota	c__Bacteroidia	o__Bacteroidales	f__Dysgonomonadaceae	g__Fermentimonas	s__unclassified_g__Fermentimonas	ASV4730	59	6.67517e-05	0	0	0	0	0	0	0	59	0	0	0	0	0	0	0	0
d__Bacteria	k__norank_d__Bacteria	p__Actinobacteriota	c__Actinobacteria	o__Micrococcales	f__Microbacteriaceae	g__Leucobacter	s__unclassified_g__Leucobacter	ASV1670	71	8.03284e-05	0	0	0	71	0	0	0	0	0	0	0	0	0	0	0	0
d__Bacteria	k__norank_d__Bacteria	p__Actinobacteriota	c__Actinobacteria	o__Micrococcales	f__Intrasporangiaceae	g__norank_f__Intrasporangiaceae	s__uncultured_bacterium_g__norank_f__Intrasporangiaceae	ASV284	66	7.46714e-05	0	0	0	59	4	0	0	0	0	0	0	0	0	3	0	0
d__Bacteria	k__norank_d__Bacteria	p__Proteobacteria	c__Alphaproteobacteria	o__Sphingomonadales	f__Sphingomonadaceae	g__Sphingomonas	s__unclassified_g__Sphingomonas	ASV225	61	6.90145e-05	58	0	0	0	0	0	0	0	0	0	0	0	0	3	0	0
d__Bacteria	k__norank_d__Bacteria	p__Firmicutes	c__Clostridia	o__Lachnospirales	f__Lachnospiraceae	g__Roseburia	s__Roseburia_inulinivorans	ASV1673	64	7.24087e-05	0	0	0	64	0	0	0	0	0	0	0	0	0	0	0	0
d__Bacteria	k__norank_d__Bacteria	p__Proteobacteria	c__Alphaproteobacteria	o__Rhizobiales	f__Rhizobiaceae	g__Allorhizobium-Neorhizobium-Pararhizobium-Rhizobium	s__unclassified_g__Allorhizobium-Neorhizobium-Pararhizobium-Rhizobium	ASV2616	69	7.80656e-05	0	31	36	0	0	0	0	0	0	0	0	0	0	0	0	2
d__Bacteria	k__norank_d__Bacteria	p__Bdellovibrionota	c__Oligoflexia	o__0319-6G20	f__norank_o__0319-6G20	g__norank_f__norank_o__0319-6G20	s__unclassified_g__norank_f__norank_o__0319-6G20	ASV1672	62	7.01459e-05	0	0	0	62	0	0	0	0	0	0	0	0	0	0	0	0
d__Bacteria	k__norank_d__Bacteria	p__Proteobacteria	c__Gammaproteobacteria	o__JG36-TzT-191	f__norank_o__JG36-TzT-191	g__norank_f__norank_o__JG36-TzT-191	s__unclassified_g__norank_f__norank_o__JG36-TzT-191	ASV3525	66	7.46714e-05	0	66	0	0	0	0	0	0	0	0	0	0	0	0	0	0
d__Bacteria	k__norank_d__Bacteria	p__Proteobacteria	c__Gammaproteobacteria	o__Competibacterales	f__Competibacteraceae	g__Candidatus_Competibacter	s__unclassified_g__Candidatus_Competibacter	ASV1055	62	7.01459e-05	0	0	0	0	0	20	5	28	2	2	0	5	0	0	0	0
d__Bacteria	k__norank_d__Bacteria	p__Proteobacteria	c__Gammaproteobacteria	o__Burkholderiales	f__Comamonadaceae	g__unclassified_f__Comamonadaceae	s__unclassified_f__Comamonadaceae	ASV2132	55	6.22262e-05	55	0	0	0	0	0	0	0	0	0	0	0	0	0	0	0
d__Bacteria	k__norank_d__Bacteria	p__Proteobacteria	c__Gammaproteobacteria	o__Burkholderiales	f__SC-I-84	g__norank_f__SC-I-84	s__unclassified_g__norank_f__SC-I-84	ASV119	64	7.24087e-05	0	0	0	58	0	0	0	0	2	0	0	0	0	4	0	0
d__Bacteria	k__norank_d__Bacteria	p__Proteobacteria	c__Gammaproteobacteria	o__Burkholderiales	f__Oxalobacteraceae	g__Massilia	s__unclassified_g__Massilia	ASV1710	61	6.90145e-05	0	0	0	54	0	0	0	0	0	0	0	0	0	0	7	0
d__Bacteria	k__norank_d__Bacteria	p__Firmicutes	c__Bacilli	o__Lactobacillales	f__Enterococcaceae	g__Enterococcus	s__unclassified_g__Enterococcus	ASV1675	69	7.80656e-05	0	0	0	69	0	0	0	0	0	0	0	0	0	0	0	0
d__Bacteria	k__norank_d__Bacteria	p__Proteobacteria	c__Gammaproteobacteria	o__Burkholderiales	f__Nitrosomonadaceae	g__DSSD61	s__uncultured_bacterium_g__DSSD61	ASV1692	66	7.46714e-05	0	0	0	62	0	0	0	0	0	0	4	0	0	0	0	0
d__Bacteria	k__norank_d__Bacteria	p__Actinobacteriota	c__Actinobacteria	o__Micrococcales	f__Intrasporangiaceae	g__Lapillicoccus	s__unclassified_g__Lapillicoccus	ASV1677	64	7.24087e-05	0	0	0	64	0	0	0	0	0	0	0	0	0	0	0	0
d__Bacteria	k__norank_d__Bacteria	p__Proteobacteria	c__Alphaproteobacteria	o__Sphingomonadales	f__Sphingomonadaceae	g__Sphingomonas	s__unclassified_g__Sphingomonas	ASV2174	63	7.12773e-05	46	15	0	0	0	0	0	0	0	0	0	2	0	0	0	0
d__Bacteria	k__norank_d__Bacteria	p__Actinobacteriota	c__Thermoleophilia	o__Solirubrobacterales	f__Solirubrobacteraceae	g__Conexibacter	s__unclassified_g__Conexibacter	ASV3527	67	7.58028e-05	0	67	0	0	0	0	0	0	0	0	0	0	0	0	0	0
d__Bacteria	k__norank_d__Bacteria	p__Proteobacteria	c__Alphaproteobacteria	o__Caulobacterales	f__Caulobacteraceae	g__Brevundimonas	s__unclassified_g__Brevundimonas	ASV1674	64	7.24087e-05	0	0	0	64	0	0	0	0	0	0	0	0	0	0	0	0
d__Bacteria	k__norank_d__Bacteria	p__Planctomycetota	c__Phycisphaerae	o__Phycisphaerales	f__Phycisphaeraceae	g__SM1A02	s__unclassified_g__SM1A02	ASV1676	68	7.69342e-05	0	0	0	68	0	0	0	0	0	0	0	0	0	0	0	0
d__Bacteria	k__norank_d__Bacteria	p__Proteobacteria	c__Gammaproteobacteria	o__Burkholderiales	f__Rhodocyclaceae	g__Propionivibrio	s__unclassified_g__Propionivibrio	ASV1921	64	7.24087e-05	0	0	44	20	0	0	0	0	0	0	0	0	0	0	0	0
d__Bacteria	k__norank_d__Bacteria	p__Firmicutes	c__Clostridia	o__Oscillospirales	f__Oscillospiraceae	g__Colidextribacter	s__gut_metagenome_g__Colidextribacter	ASV1688	65	7.35401e-05	0	0	0	64	0	0	1	0	0	0	0	0	0	0	0	0
d__Bacteria	k__norank_d__Bacteria	p__Bacteroidota	c__Bacteroidia	o__Bacteroidales	f__Bacteroidaceae	g__Bacteroides	s__unclassified_g__Bacteroides	ASV387	66	7.46714e-05	0	0	0	0	26	23	0	17	0	0	0	0	0	0	0	0
d__Bacteria	k__norank_d__Bacteria	p__Chloroflexi	c__Ktedonobacteria	o__Ktedonobacterales	f__JG30-KF-AS9	g__norank_f__JG30-KF-AS9	s__uncultured_Thermosporothrix_sp._g__norank_f__JG30-KF-AS9	ASV3526	60	6.78831e-05	0	60	0	0	0	0	0	0	0	0	0	0	0	0	0	0
d__Bacteria	k__norank_d__Bacteria	p__Proteobacteria	c__Gammaproteobacteria	o__Burkholderiales	f__Sutterellaceae	g__Parasutterella	s__unclassified_g__Parasutterella	ASV84	67	7.58028e-05	0	0	0	0	24	0	35	0	0	0	0	0	0	8	0	0
d__Bacteria	k__norank_d__Bacteria	p__Proteobacteria	c__Gammaproteobacteria	o__Burkholderiales	f__Comamonadaceae	g__Ramlibacter	s__unclassified_g__Ramlibacter	ASV1680	63	7.12773e-05	0	0	0	63	0	0	0	0	0	0	0	0	0	0	0	0
d__Bacteria	k__norank_d__Bacteria	p__Actinobacteriota	c__Actinobacteria	o__Frankiales	f__Acidothermaceae	g__Acidothermus	s__uncultured_bacterium_g__Acidothermus	ASV2133	60	6.78831e-05	60	0	0	0	0	0	0	0	0	0	0	0	0	0	0	0
d__Bacteria	k__norank_d__Bacteria	p__Firmicutes	c__Clostridia	o__Peptostreptococcales-Tissierellales	f__Anaerovoracaceae	g__unclassified_f__Anaerovoracaceae	s__unclassified_f__Anaerovoracaceae	ASV2462	65	7.35401e-05	0	0	65	0	0	0	0	0	0	0	0	0	0	0	0	0
d__Bacteria	k__norank_d__Bacteria	p__Actinobacteriota	c__Thermoleophilia	o__Gaiellales	f__Gaiellaceae	g__Gaiella	s__unclassified_g__Gaiella	ASV2144	54	6.10948e-05	49	0	0	0	0	0	0	0	0	0	0	0	0	0	0	5
d__Bacteria	k__norank_d__Bacteria	p__Bacteroidota	c__Bacteroidia	o__Bacteroidales	f__Bacteroidaceae	g__Bacteroides	s__unclassified_g__Bacteroides	ASV367	66	7.46714e-05	0	0	0	0	35	0	0	20	0	0	0	11	0	0	0	0
d__Bacteria	k__norank_d__Bacteria	p__Bacteroidota	c__Bacteroidia	o__Bacteroidales	f__unclassified_o__Bacteroidales	g__unclassified_o__Bacteroidales	s__unclassified_o__Bacteroidales	ASV2466	65	7.35401e-05	0	0	65	0	0	0	0	0	0	0	0	0	0	0	0	0
d__Bacteria	k__norank_d__Bacteria	p__Proteobacteria	c__Gammaproteobacteria	o__Gammaproteobacteria_Incertae_Sedis	f__unclassified_o__Gammaproteobacteria_Incertae_Sedis	g__Acidibacter	s__unclassified_g__Acidibacter	ASV3528	64	7.24087e-05	0	64	0	0	0	0	0	0	0	0	0	0	0	0	0	0
d__Bacteria	k__norank_d__Bacteria	p__Bacteroidota	c__Bacteroidia	o__Bacteroidales	f__Prevotellaceae	g__unclassified_f__Prevotellaceae	s__unclassified_f__Prevotellaceae	ASV2464	65	7.35401e-05	0	0	65	0	0	0	0	0	0	0	0	0	0	0	0	0
d__Bacteria	k__norank_d__Bacteria	p__Proteobacteria	c__Alphaproteobacteria	o__Rhizobiales	f__Rhizobiaceae	g__Allorhizobium-Neorhizobium-Pararhizobium-Rhizobium	s__unclassified_g__Allorhizobium-Neorhizobium-Pararhizobium-Rhizobium	ASV2463	66	7.46714e-05	0	0	66	0	0	0	0	0	0	0	0	0	0	0	0	0
d__Bacteria	k__norank_d__Bacteria	p__Actinobacteriota	c__Actinobacteria	o__Frankiales	f__Acidothermaceae	g__Acidothermus	s__uncultured_Actinomycetales_bacterium_g__Acidothermus	ASV1954	69	7.80656e-05	0	50	0	19	0	0	0	0	0	0	0	0	0	0	0	0
d__Bacteria	k__norank_d__Bacteria	p__Firmicutes	c__Clostridia	o__Lachnospirales	f__Lachnospiraceae	g__Hungatella	s__unclassified_g__Hungatella	ASV2461	70	7.9197e-05	0	0	70	0	0	0	0	0	0	0	0	0	0	0	0	0
d__Bacteria	k__norank_d__Bacteria	p__Firmicutes	c__Bacilli	o__Lactobacillales	f__Carnobacteriaceae	g__norank_f__Carnobacteriaceae	s__uncultured_bacterium_g__norank_f__Carnobacteriaceae	ASV2134	61	6.90145e-05	61	0	0	0	0	0	0	0	0	0	0	0	0	0	0	0
d__Bacteria	k__norank_d__Bacteria	p__Proteobacteria	c__Gammaproteobacteria	o__Pseudomonadales	f__Pseudomonadaceae	g__Pseudomonas	s__unclassified_g__Pseudomonas	ASV827	67	7.58028e-05	0	0	0	64	3	0	0	0	0	0	0	0	0	0	0	0
d__Bacteria	k__norank_d__Bacteria	p__Bacteroidota	c__Bacteroidia	o__Flavobacteriales	f__Weeksellaceae	g__Chryseobacterium	s__unclassified_g__Chryseobacterium	ASV1683	66	7.46714e-05	0	0	0	66	0	0	0	0	0	0	0	0	0	0	0	0
d__Bacteria	k__norank_d__Bacteria	p__Proteobacteria	c__Alphaproteobacteria	o__Acetobacterales	f__Acetobacteraceae	g__Gluconobacter	s__unclassified_g__Gluconobacter	ASV2468	61	6.90145e-05	0	0	61	0	0	0	0	0	0	0	0	0	0	0	0	0
d__Bacteria	k__norank_d__Bacteria	p__Actinobacteriota	c__Thermoleophilia	o__Solirubrobacterales	f__Solirubrobacteraceae	g__Conexibacter	s__unclassified_g__Conexibacter	ASV3530	67	7.58028e-05	0	67	0	0	0	0	0	0	0	0	0	0	0	0	0	0
d__Bacteria	k__norank_d__Bacteria	p__Bacteroidota	c__Bacteroidia	o__Flavobacteriales	f__Flavobacteriaceae	g__Flavobacterium	s__unclassified_g__Flavobacterium	ASV2467	57	6.4489e-05	0	0	57	0	0	0	0	0	0	0	0	0	0	0	0	0
d__Bacteria	k__norank_d__Bacteria	p__Actinobacteriota	c__Actinobacteria	o__Catenulisporales	f__Actinospicaceae	g__Actinospica	s__unclassified_g__Actinospica	ASV3529	64	7.24087e-05	0	64	0	0	0	0	0	0	0	0	0	0	0	0	0	0
d__Bacteria	k__norank_d__Bacteria	p__Firmicutes	c__Clostridia	o__Peptostreptococcales-Tissierellales	f__Acidaminobacteraceae	g__Acidaminobacter	s__uncultured_bacterium_g__Acidaminobacter	ASV2478	63	7.12773e-05	0	0	59	0	0	0	0	0	0	0	0	0	0	0	0	4
d__Bacteria	k__norank_d__Bacteria	p__Firmicutes	c__Bacilli	o__Staphylococcales	f__Staphylococcaceae	g__Staphylococcus	s__unclassified_g__Staphylococcus	ASV1682	61	6.90145e-05	0	0	0	61	0	0	0	0	0	0	0	0	0	0	0	0
d__Bacteria	k__norank_d__Bacteria	p__Myxococcota	c__Polyangia	o__Polyangiales	f__Sandaracinaceae	g__norank_f__Sandaracinaceae	s__uncultured_compost_bacterium_g__norank_f__Sandaracinaceae	ASV4731	64	7.24087e-05	0	0	0	0	0	0	0	64	0	0	0	0	0	0	0	0
d__Bacteria	k__norank_d__Bacteria	p__Bacteroidota	c__Bacteroidia	o__Bacteroidales	f__Marinilabiliaceae	g__Cytophaga_xylanolytica_group	s__unclassified_g__Cytophaga_xylanolytica_group	ASV1742	67	7.58028e-05	0	12	0	53	0	0	0	2	0	0	0	0	0	0	0	0
d__Bacteria	k__norank_d__Bacteria	p__Actinobacteriota	c__Acidimicrobiia	o__IMCC26256	f__norank_o__IMCC26256	g__norank_f__norank_o__IMCC26256	s__unclassified_g__norank_f__norank_o__IMCC26256	ASV3532	64	7.24087e-05	0	64	0	0	0	0	0	0	0	0	0	0	0	0	0	0
d__Bacteria	k__norank_d__Bacteria	p__Proteobacteria	c__Alphaproteobacteria	o__Reyranellales	f__Reyranellaceae	g__Reyranella	s__unclassified_g__Reyranella	ASV1687	65	7.35401e-05	0	0	0	65	0	0	0	0	0	0	0	0	0	0	0	0
d__Bacteria	k__norank_d__Bacteria	p__Proteobacteria	c__Alphaproteobacteria	o__Elsterales	f__norank_o__Elsterales	g__norank_f__norank_o__Elsterales	s__uncultured_bacterium_g__norank_f__norank_o__Elsterales	ASV3533	64	7.24087e-05	0	64	0	0	0	0	0	0	0	0	0	0	0	0	0	0
d__Bacteria	k__norank_d__Bacteria	p__Actinobacteriota	c__Actinobacteria	o__Propionibacteriales	f__Nocardioidaceae	g__Nocardioides	s__unclassified_g__Nocardioides	ASV2135	55	6.22262e-05	55	0	0	0	0	0	0	0	0	0	0	0	0	0	0	0
d__Bacteria	k__norank_d__Bacteria	p__Firmicutes	c__Clostridia	o__Oscillospirales	f__Oscillospiraceae	g__unclassified_f__Oscillospiraceae	s__unclassified_f__Oscillospiraceae	ASV2136	64	7.24087e-05	64	0	0	0	0	0	0	0	0	0	0	0	0	0	0	0
d__Bacteria	k__norank_d__Bacteria	p__Proteobacteria	c__Gammaproteobacteria	o__Alteromonadales	f__Shewanellaceae	g__Shewanella	s__unclassified_g__Shewanella	ASV1963	55	6.22262e-05	40	0	0	15	0	0	0	0	0	0	0	0	0	0	0	0
d__Bacteria	k__norank_d__Bacteria	p__Proteobacteria	c__Gammaproteobacteria	o__Burkholderiales	f__Rhodocyclaceae	g__unclassified_f__Rhodocyclaceae	s__unclassified_f__Rhodocyclaceae	ASV2471	61	6.90145e-05	0	0	61	0	0	0	0	0	0	0	0	0	0	0	0	0
d__Bacteria	k__norank_d__Bacteria	p__Proteobacteria	c__Alphaproteobacteria	o__Sphingomonadales	f__Sphingomonadaceae	g__Altererythrobacter	s__unclassified_g__Altererythrobacter	ASV1689	61	6.90145e-05	0	0	0	61	0	0	0	0	0	0	0	0	0	0	0	0
d__Bacteria	k__norank_d__Bacteria	p__Proteobacteria	c__Alphaproteobacteria	o__Rhizobiales	f__Rhizobiaceae	g__Shinella	s__unclassified_g__Shinella	ASV2470	62	7.01459e-05	0	0	62	0	0	0	0	0	0	0	0	0	0	0	0	0
d__Bacteria	k__norank_d__Bacteria	p__Bacteroidota	c__Bacteroidia	o__Flavobacteriales	f__Weeksellaceae	g__Cloacibacterium	s__uncultured_bacterium_g__Cloacibacterium	ASV1212	64	7.24087e-05	0	0	50	0	0	7	0	0	0	0	0	0	0	0	7	0
d__Bacteria	k__norank_d__Bacteria	p__Firmicutes	c__Clostridia	o__Lachnospirales	f__Lachnospiraceae	g__Blautia	s__unclassified_g__Blautia	ASV1686	65	7.35401e-05	0	0	0	65	0	0	0	0	0	0	0	0	0	0	0	0
d__Bacteria	k__norank_d__Bacteria	p__Proteobacteria	c__Alphaproteobacteria	o__Rhizobiales	f__Xanthobacteraceae	g__norank_f__Xanthobacteraceae	s__uncultured_forest_soil_bacterium_g__norank_f__Xanthobacteraceae	ASV3531	64	7.24087e-05	0	64	0	0	0	0	0	0	0	0	0	0	0	0	0	0
d__Bacteria	k__norank_d__Bacteria	p__Firmicutes	c__Clostridia	o__Lachnospirales	f__Lachnospiraceae	g__Dorea	s__unclassified_g__Dorea	ASV42	66	7.46714e-05	0	0	0	0	8	13	16	0	0	0	0	13	0	16	0	0
d__Bacteria	k__norank_d__Bacteria	p__Proteobacteria	c__Gammaproteobacteria	o__Pseudomonadales	f__Moraxellaceae	g__Acinetobacter	s__unclassified_g__Acinetobacter	ASV1968	64	7.24087e-05	7	43	0	14	0	0	0	0	0	0	0	0	0	0	0	0
d__Bacteria	k__norank_d__Bacteria	p__Actinobacteriota	c__Actinobacteria	o__Bifidobacteriales	f__Bifidobacteriaceae	g__Gardnerella	s__unclassified_g__Gardnerella	ASV2232	61	6.90145e-05	2	0	59	0	0	0	0	0	0	0	0	0	0	0	0	0
d__Bacteria	k__norank_d__Bacteria	p__Proteobacteria	c__Alphaproteobacteria	o__Rhizobiales	f__Rhizobiaceae	g__Candidatus_Liberibacter	s__unclassified_g__Candidatus_Liberibacter	ASV2239	60	6.78831e-05	0	0	0	0	0	0	0	0	25	0	35	0	0	0	0	0
d__Bacteria	k__norank_d__Bacteria	p__Proteobacteria	c__Gammaproteobacteria	o__Enterobacterales	f__Enterobacteriaceae	g__Klebsiella	s__unclassified_g__Klebsiella	ASV1421	61	6.90145e-05	0	0	38	0	0	3	19	0	0	0	0	1	0	0	0	0
d__Bacteria	k__norank_d__Bacteria	p__Firmicutes	c__Bacilli	o__Bacillales	f__Bacillaceae	g__Bacillus	s__Bacillaceae_bacterium_mt8	ASV1685	59	6.67517e-05	0	0	0	59	0	0	0	0	0	0	0	0	0	0	0	0
d__Bacteria	k__norank_d__Bacteria	p__Desulfobacterota	c__Desulfobulbia	o__Desulfobulbales	f__Desulfobulbaceae	g__Desulfobulbus	s__unclassified_g__Desulfobulbus	ASV2137	60	6.78831e-05	60	0	0	0	0	0	0	0	0	0	0	0	0	0	0	0
d__Bacteria	k__norank_d__Bacteria	p__Proteobacteria	c__Gammaproteobacteria	o__Burkholderiales	f__Aquaspirillaceae	g__Rivicola	s__unclassified_g__Rivicola	ASV1691	63	7.12773e-05	0	0	0	63	0	0	0	0	0	0	0	0	0	0	0	0
d__Bacteria	k__norank_d__Bacteria	p__Proteobacteria	c__Gammaproteobacteria	o__PLTA13	f__norank_o__PLTA13	g__norank_f__norank_o__PLTA13	s__uncultured_sludge_bacterium_g__norank	ASV1753	65	7.35401e-05	0	0	0	51	0	0	11	0	0	0	0	0	0	0	3	0
d__Bacteria	k__norank_d__Bacteria	p__Actinobacteriota	c__Actinobacteria	o__Pseudonocardiales	f__Pseudonocardiaceae	g__Actinomycetospora	s__unclassified_g__Actinomycetospora	ASV2472	63	7.12773e-05	0	0	63	0	0	0	0	0	0	0	0	0	0	0	0	0
d__Bacteria	k__norank_d__Bacteria	p__Bacteroidota	c__Bacteroidia	o__Bacteroidales	f__Marinilabiliaceae	g__unclassified_f__Marinilabiliaceae	s__unclassified_f__Marinilabiliaceae	ASV78	60	6.78831e-05	0	0	0	0	0	0	0	52	0	0	0	0	0	8	0	0
d__Bacteria	k__norank_d__Bacteria	p__Actinobacteriota	c__Actinobacteria	o__Propionibacteriales	f__Propionibacteriaceae	g__Pseudopropionibacterium	s__unclassified_g__Pseudopropionibacterium	ASV427	60	6.78831e-05	0	0	0	0	14	15	16	9	0	0	3	1	0	0	2	0
d__Bacteria	k__norank_d__Bacteria	p__Firmicutes	c__Bacilli	o__Staphylococcales	f__Staphylococcaceae	g__Staphylococcus	s__unclassified_g__Staphylococcus	ASV2139	59	6.67517e-05	59	0	0	0	0	0	0	0	0	0	0	0	0	0	0	0
d__Bacteria	k__norank_d__Bacteria	p__Acidobacteriota	c__Acidobacteriae	o__Subgroup_2	f__norank_o__Subgroup_2	g__norank_f__norank_o__Subgroup_2	s__uncultured_eubacterium_WD2123	ASV3534	64	7.24087e-05	0	64	0	0	0	0	0	0	0	0	0	0	0	0	0	0
d__Bacteria	k__norank_d__Bacteria	p__Proteobacteria	c__Alphaproteobacteria	o__Rhizobiales	f__Beijerinckiaceae	g__Methylobacterium-Methylorubrum	s__unclassified_g__Methylobacterium-Methylorubrum	ASV2474	64	7.24087e-05	0	0	64	0	0	0	0	0	0	0	0	0	0	0	0	0
d__Bacteria	k__norank_d__Bacteria	p__Bacteroidota	c__Bacteroidia	o__Bacteroidales	f__Bacteroidaceae	g__Bacteroides	s__unclassified_g__Bacteroides	ASV2473	62	7.01459e-05	0	0	62	0	0	0	0	0	0	0	0	0	0	0	0	0
d__Bacteria	k__norank_d__Bacteria	p__Proteobacteria	c__Gammaproteobacteria	o__Pasteurellales	f__Pasteurellaceae	g__unclassified_f__Pasteurellaceae	s__unclassified_f__Pasteurellaceae	ASV2138	54	6.10948e-05	54	0	0	0	0	0	0	0	0	0	0	0	0	0	0	0
d__Bacteria	k__norank_d__Bacteria	p__Proteobacteria	c__Gammaproteobacteria	o__Burkholderiales	f__Alcaligenaceae	g__unclassified_f__Alcaligenaceae	s__unclassified_f__Alcaligenaceae	ASV4732	57	6.4489e-05	0	0	0	0	0	0	0	57	0	0	0	0	0	0	0	0
d__Bacteria	k__norank_d__Bacteria	p__Actinobacteriota	c__Thermoleophilia	o__Solirubrobacterales	f__67-14	g__norank_f__67-14	s__unclassified_g__norank_f__67-14	ASV1693	63	7.12773e-05	0	0	0	63	0	0	0	0	0	0	0	0	0	0	0	0
d__Bacteria	k__norank_d__Bacteria	p__Bacteroidota	c__Bacteroidia	o__Bacteroidales	f__Bacteroidaceae	g__Bacteroides	s__unclassified_g__Bacteroides	ASV64	63	7.12773e-05	0	0	0	0	10	9	27	0	0	0	0	0	7	10	0	0
d__Bacteria	k__norank_d__Bacteria	p__Firmicutes	c__Clostridia	o__Christensenellales	f__Christensenellaceae	g__Christensenellaceae_R-7_group	s__bacterium_enrichment_culture_clone_DPF35	ASV3642	60	6.78831e-05	0	43	0	0	0	0	0	17	0	0	0	0	0	0	0	0
d__Bacteria	k__norank_d__Bacteria	p__Firmicutes	c__Clostridia	o__Lachnospirales	f__Lachnospiraceae	g__unclassified_f__Lachnospiraceae	s__unclassified_f__Lachnospiraceae	ASV390	60	6.78831e-05	0	0	0	0	21	11	21	7	0	0	0	0	0	0	0	0
d__Bacteria	k__norank_d__Bacteria	p__Proteobacteria	c__Gammaproteobacteria	o__KF-JG30-C25	f__norank_o__KF-JG30-C25	g__norank_f__norank_o__KF-JG30-C25	s__unclassified_g__norank_f__norank_o__KF-JG30-C25	ASV349	62	7.01459e-05	0	0	0	0	46	0	6	0	0	0	2	8	0	0	0	0
d__Bacteria	k__norank_d__Bacteria	p__Acidobacteriota	c__Acidobacteriae	o__Acidobacteriales	f__norank_o__Acidobacteriales	g__norank_f__norank_o__Acidobacteriales	s__unclassified_g__norank_f__norank_o__Acidobacteriales	ASV3535	58	6.56204e-05	0	58	0	0	0	0	0	0	0	0	0	0	0	0	0	0
d__Bacteria	k__norank_d__Bacteria	p__Actinobacteriota	c__Actinobacteria	o__Corynebacteriales	f__Corynebacteriaceae	g__Corynebacterium	s__unclassified_g__Corynebacterium	ASV2140	53	5.99634e-05	53	0	0	0	0	0	0	0	0	0	0	0	0	0	0	0
d__Bacteria	k__norank_d__Bacteria	p__Proteobacteria	c__Alphaproteobacteria	o__norank_c__Alphaproteobacteria	f__norank_o__norank_c__Alphaproteobacteria	g__norank_f__norank_o__norank_c__Alphaproteobacteria	s__unclassified_g__norank_f__norank_o__norank_c__Alphaproteobacteria	ASV2165	57	6.4489e-05	50	0	7	0	0	0	0	0	0	0	0	0	0	0	0	0
d__Bacteria	k__norank_d__Bacteria	p__Actinobacteriota	c__Actinobacteria	o__Corynebacteriales	f__Corynebacteriaceae	g__Corynebacterium	s__unclassified_g__Corynebacterium	ASV2141	57	6.4489e-05	57	0	0	0	0	0	0	0	0	0	0	0	0	0	0	0
d__Bacteria	k__norank_d__Bacteria	p__Firmicutes	c__Clostridia	o__Lachnospirales	f__Lachnospiraceae	g__Eubacterium_hallii_group	s__unclassified_g__Eubacterium_hallii_group	ASV376	60	6.78831e-05	0	0	0	0	29	0	19	8	0	0	4	0	0	0	0	0
d__Bacteria	k__norank_d__Bacteria	p__Firmicutes	c__Clostridia	o__Clostridiales	f__Clostridiaceae	g__Clostridium_sensu_stricto_14	s__unclassified_g__Clostridium_sensu_stricto_14	ASV2476	60	6.78831e-05	0	0	60	0	0	0	0	0	0	0	0	0	0	0	0	0
d__Bacteria	k__norank_d__Bacteria	p__Acidobacteriota	c__Acidobacteriae	o__Bryobacterales	f__Bryobacteraceae	g__Bryobacter	s__unclassified_g__Bryobacter	ASV3536	61	6.90145e-05	0	61	0	0	0	0	0	0	0	0	0	0	0	0	0	0
d__Bacteria	k__norank_d__Bacteria	p__Bacteroidota	c__Bacteroidia	o__Chitinophagales	f__Saprospiraceae	g__norank_f__Saprospiraceae	s__uncultured_Saprospiraceae_bacterium_g__norank	ASV2475	60	6.78831e-05	0	0	60	0	0	0	0	0	0	0	0	0	0	0	0	0
d__Bacteria	k__norank_d__Bacteria	p__Actinobacteriota	c__Actinobacteria	o__Frankiales	f__Frankiaceae	g__unclassified_f__Frankiaceae	s__unclassified_f__Frankiaceae	ASV2477	59	6.67517e-05	0	0	59	0	0	0	0	0	0	0	0	0	0	0	0	0
d__Bacteria	k__norank_d__Bacteria	p__Actinobacteriota	c__Actinobacteria	o__Corynebacteriales	f__Nocardiaceae	g__Rhodococcus	s__unclassified_g__Rhodococcus	ASV4733	58	6.56204e-05	0	0	0	0	0	0	0	58	0	0	0	0	0	0	0	0
d__Bacteria	k__norank_d__Bacteria	p__Proteobacteria	c__Gammaproteobacteria	o__Burkholderiales	f__Oxalobacteraceae	g__Massilia	s__unclassified_g__Massilia	ASV1699	57	6.4489e-05	0	0	0	57	0	0	0	0	0	0	0	0	0	0	0	0
d__Bacteria	k__norank_d__Bacteria	p__Proteobacteria	c__Alphaproteobacteria	o__Rhizobiales	f__Xanthobacteraceae	g__norank_f__Xanthobacteraceae	s__unclassified_g__norank_f__Xanthobacteraceae	ASV3537	62	7.01459e-05	0	62	0	0	0	0	0	0	0	0	0	0	0	0	0	0
d__Bacteria	k__norank_d__Bacteria	p__Actinobacteriota	c__Thermoleophilia	o__Gaiellales	f__norank_o__Gaiellales	g__norank_f__norank_o__Gaiellales	s__unclassified_g__norank_f__norank_o__Gaiellales	ASV1698	60	6.78831e-05	0	0	0	60	0	0	0	0	0	0	0	0	0	0	0	0
d__Bacteria	k__norank_d__Bacteria	p__Bacteroidota	c__Bacteroidia	o__Bacteroidales	f__Tannerellaceae	g__Parabacteroides	s__unclassified_g__Parabacteroides	ASV2479	61	6.90145e-05	0	0	61	0	0	0	0	0	0	0	0	0	0	0	0	0
d__Bacteria	k__norank_d__Bacteria	p__Actinobacteriota	c__Actinobacteria	o__Micrococcales	f__Intrasporangiaceae	g__Knoellia	s__uncultured_bacterium_g__Knoellia	ASV2142	54	6.10948e-05	54	0	0	0	0	0	0	0	0	0	0	0	0	0	0	0
d__Bacteria	k__norank_d__Bacteria	p__Firmicutes	c__Clostridia	o__Oscillospirales	f__Ruminococcaceae	g__Faecalibacterium	s__unclassified_g__Faecalibacterium	ASV409	55	6.22262e-05	0	0	0	0	15	8	0	24	8	0	0	0	0	0	0	0
d__Bacteria	k__norank_d__Bacteria	p__Proteobacteria	c__Gammaproteobacteria	o__Burkholderiales	f__Burkholderiaceae	g__Burkholderia-Caballeronia-Paraburkholderia	s__unclassified_g__Burkholderia-Caballeronia-Paraburkholderia	ASV3538	63	7.12773e-05	0	63	0	0	0	0	0	0	0	0	0	0	0	0	0	0
d__Bacteria	k__norank_d__Bacteria	p__Actinobacteriota	c__Actinobacteria	o__Micrococcales	f__Microbacteriaceae	g__Leucobacter	s__unclassified_g__Leucobacter	ASV77	61	6.90145e-05	0	0	0	52	0	0	0	0	0	0	0	0	0	9	0	0
d__Bacteria	k__norank_d__Bacteria	p__Actinobacteriota	c__Actinobacteria	o__Micrococcales	f__Micrococcaceae	g__Rothia	s__unclassified_g__Rothia	ASV2143	55	6.22262e-05	55	0	0	0	0	0	0	0	0	0	0	0	0	0	0	0
d__Bacteria	k__norank_d__Bacteria	p__Actinobacteriota	c__Actinobacteria	o__Corynebacteriales	f__Dietziaceae	g__Dietzia	s__unclassified_g__Dietzia	ASV1095	63	7.12773e-05	0	0	0	49	0	14	0	0	0	0	0	0	0	0	0	0
d__Bacteria	k__norank_d__Bacteria	p__RCP2-54	c__norank_p__RCP2-54	o__norank_c__norank_p__RCP2-54	f__norank_o__norank_c__norank_p__RCP2-54	g__norank_f__norank_o__norank_c__norank_p__RCP2-54	s__uncultured_bacterium_g__norank_f__norank_o__norank_c__norank_p__RCP2-54	ASV3539	61	6.90145e-05	0	61	0	0	0	0	0	0	0	0	0	0	0	0	0	0
d__Bacteria	k__norank_d__Bacteria	p__Firmicutes	c__Bacilli	o__Bacillales	f__Bacillaceae	g__Bacillus	s__unclassified_g__Bacillus	ASV1157	56	6.33576e-05	0	0	0	36	0	9	0	11	0	0	0	0	0	0	0	0
d__Bacteria	k__norank_d__Bacteria	p__Actinobacteriota	c__Actinobacteria	o__Propionibacteriales	f__Propionibacteriaceae	g__Propionicicella	s__uncultured_bacterium_g__Propionicicella	ASV1815	60	6.78831e-05	0	0	23	37	0	0	0	0	0	0	0	0	0	0	0	0
d__Bacteria	k__norank_d__Bacteria	p__Firmicutes	c__Clostridia	o__Oscillospirales	f__Ruminococcaceae	g__Faecalibacterium	s__unclassified_g__Faecalibacterium	ASV2925	66	7.46714e-05	0	0	0	0	0	0	66	0	0	0	0	0	0	0	0	0
d__Bacteria	k__norank_d__Bacteria	p__Proteobacteria	c__Gammaproteobacteria	o__Burkholderiales	f__Comamonadaceae	g__unclassified_f__Comamonadaceae	s__unclassified_f__Comamonadaceae	ASV5575	53	5.99634e-05	0	0	0	0	0	0	0	0	53	0	0	0	0	0	0	0
d__Bacteria	k__norank_d__Bacteria	p__Firmicutes	c__Bacilli	o__Lactobacillales	f__Aerococcaceae	g__Dolosicoccus	s__uncultured_bacterium_g__Dolosicoccus	ASV2145	60	6.78831e-05	60	0	0	0	0	0	0	0	0	0	0	0	0	0	0	0
d__Bacteria	k__norank_d__Bacteria	p__Firmicutes	c__Clostridia	o__Lachnospirales	f__Lachnospiraceae	g__unclassified_f__Lachnospiraceae	s__unclassified_f__Lachnospiraceae	ASV1702	59	6.67517e-05	0	0	0	59	0	0	0	0	0	0	0	0	0	0	0	0
d__Bacteria	k__norank_d__Bacteria	p__Proteobacteria	c__Gammaproteobacteria	o__Burkholderiales	f__Oxalobacteraceae	g__Massilia	s__unclassified_g__Massilia	ASV1738	58	6.56204e-05	0	0	0	53	0	0	0	0	0	0	0	0	0	0	5	0
d__Bacteria	k__norank_d__Bacteria	p__Proteobacteria	c__Gammaproteobacteria	o__Arenicellales	f__Arenicellaceae	g__norank_f__Arenicellaceae	s__uncultured_prokaryote_g__norank_f__Arenicellaceae	ASV1704	61	6.90145e-05	0	0	0	61	0	0	0	0	0	0	0	0	0	0	0	0
d__Bacteria	k__norank_d__Bacteria	p__Proteobacteria	c__Gammaproteobacteria	o__Burkholderiales	f__Comamonadaceae	g__unclassified_f__Comamonadaceae	s__unclassified_f__Comamonadaceae	ASV2482	62	7.01459e-05	0	0	62	0	0	0	0	0	0	0	0	0	0	0	0	0
d__Bacteria	k__norank_d__Bacteria	p__Firmicutes	c__Clostridia	o__Christensenellales	f__Christensenellaceae	g__Christensenellaceae_R-7_group	s__gut_metagenome_g__Christensenellaceae_R-7_group	ASV426	54	6.10948e-05	0	0	0	0	13	16	13	0	0	0	2	10	0	0	0	0
d__Bacteria	k__norank_d__Bacteria	p__Bacteroidota	c__Bacteroidia	o__Flavobacteriales	f__Cryomorphaceae	g__Cryomorpha	s__uncultured_Flavobacteriales_bacterium_g__Cryomorpha	ASV4734	57	6.4489e-05	0	0	0	0	0	0	0	57	0	0	0	0	0	0	0	0
d__Bacteria	k__norank_d__Bacteria	p__Proteobacteria	c__Alphaproteobacteria	o__Rhizobiales	f__Xanthobacteraceae	g__Bradyrhizobium	s__unclassified_g__Bradyrhizobium	ASV3541	61	6.90145e-05	0	61	0	0	0	0	0	0	0	0	0	0	0	0	0	0
d__Bacteria	k__norank_d__Bacteria	p__Acidobacteriota	c__Acidobacteriae	o__Solibacterales	f__Solibacteraceae	g__Candidatus_Solibacter	s__unclassified_g__Candidatus_Solibacter	ASV3540	61	6.90145e-05	0	61	0	0	0	0	0	0	0	0	0	0	0	0	0	0
d__Bacteria	k__norank_d__Bacteria	p__Bacteroidota	c__Bacteroidia	o__Bacteroidales	f__Tannerellaceae	g__Macellibacteroides	s__unclassified_g__Macellibacteroides	ASV2481	58	6.56204e-05	0	0	58	0	0	0	0	0	0	0	0	0	0	0	0	0
d__Bacteria	k__norank_d__Bacteria	p__Proteobacteria	c__Gammaproteobacteria	o__Xanthomonadales	f__Xanthomonadaceae	g__unclassified_f__Xanthomonadaceae	s__unclassified_f__Xanthomonadaceae	ASV2147	60	6.78831e-05	60	0	0	0	0	0	0	0	0	0	0	0	0	0	0	0
d__Bacteria	k__norank_d__Bacteria	p__Acidobacteriota	c__Acidobacteriae	o__Subgroup_2	f__norank_o__Subgroup_2	g__norank_f__norank_o__Subgroup_2	s__uncultured_organism_g__norank_f__norank_o__Subgroup_2	ASV3543	61	6.90145e-05	0	61	0	0	0	0	0	0	0	0	0	0	0	0	0	0
d__Bacteria	k__norank_d__Bacteria	p__Proteobacteria	c__Gammaproteobacteria	o__Burkholderiales	f__Methylophilaceae	g__Methylophilus	s__unclassified_g__Methylophilus	ASV2146	52	5.8832e-05	52	0	0	0	0	0	0	0	0	0	0	0	0	0	0	0
d__Bacteria	k__norank_d__Bacteria	p__Abditibacteriota	c__Abditibacteria	o__Abditibacteriales	f__Abditibacteriaceae	g__Abditibacterium	s__unclassified_g__Abditibacterium	ASV1707	61	6.90145e-05	0	0	0	61	0	0	0	0	0	0	0	0	0	0	0	0
d__Bacteria	k__norank_d__Bacteria	p__Proteobacteria	c__Alphaproteobacteria	o__Sphingomonadales	f__Sphingomonadaceae	g__Sphingomonas	s__unidentified_marine_bacterioplankton_g__Sphingomonas	ASV3542	57	6.4489e-05	0	57	0	0	0	0	0	0	0	0	0	0	0	0	0	0
d__Bacteria	k__norank_d__Bacteria	p__Proteobacteria	c__Gammaproteobacteria	o__Burkholderiales	f__Rhodocyclaceae	g__Thauera	s__unclassified_g__Thauera	ASV2484	59	6.67517e-05	0	0	59	0	0	0	0	0	0	0	0	0	0	0	0	0
d__Bacteria	k__norank_d__Bacteria	p__Bacteroidota	c__Bacteroidia	o__Bacteroidales	f__Dysgonomonadaceae	g__norank_f__Dysgonomonadaceae	s__unclassified_g__norank_f__Dysgonomonadaceae	ASV2483	55	6.22262e-05	0	0	55	0	0	0	0	0	0	0	0	0	0	0	0	0
d__Bacteria	k__norank_d__Bacteria	p__Proteobacteria	c__Gammaproteobacteria	o__Enterobacterales	f__Erwiniaceae	g__unclassified_f__Erwiniaceae	s__unclassified_f__Erwiniaceae	ASV1887	61	6.90145e-05	0	0	29	32	0	0	0	0	0	0	0	0	0	0	0	0
d__Bacteria	k__norank_d__Bacteria	p__Proteobacteria	c__Gammaproteobacteria	o__Burkholderiales	f__Comamonadaceae	g__Acidovorax	s__unclassified_g__Acidovorax	ASV144	56	6.33576e-05	35	0	0	0	5	0	11	0	0	0	0	0	0	5	0	0
d__Bacteria	k__norank_d__Bacteria	p__Actinobacteriota	c__Actinobacteria	o__Pseudonocardiales	f__Pseudonocardiaceae	g__Actinomycetospora	s__unclassified_g__Actinomycetospora	ASV1966	60	6.78831e-05	0	0	46	14	0	0	0	0	0	0	0	0	0	0	0	0
d__Bacteria	k__norank_d__Bacteria	p__Actinobacteriota	c__Thermoleophilia	o__Solirubrobacterales	f__Solirubrobacteraceae	g__Conexibacter	s__unclassified_g__Conexibacter	ASV3544	61	6.90145e-05	0	61	0	0	0	0	0	0	0	0	0	0	0	0	0	0
d__Bacteria	k__norank_d__Bacteria	p__Firmicutes	c__Clostridia	o__Clostridiales	f__Caloramatoraceae	g__Fonticella	s__uncultured_bacterium_g__Fonticella	ASV1708	57	6.4489e-05	0	0	0	57	0	0	0	0	0	0	0	0	0	0	0	0
d__Bacteria	k__norank_d__Bacteria	p__Proteobacteria	c__Alphaproteobacteria	o__Sphingomonadales	f__Sphingomonadaceae	g__Sphingomonas	s__unclassified_g__Sphingomonas	ASV1711	59	6.67517e-05	0	0	0	59	0	0	0	0	0	0	0	0	0	0	0	0
d__Bacteria	k__norank_d__Bacteria	p__Chloroflexi	c__AD3	o__norank_c__AD3	f__norank_o__norank_c__AD3	g__norank_f__norank_o__norank_c__AD3	s__unclassified_g__norank_f__norank_o__norank_c__AD3	ASV1090	56	6.33576e-05	0	0	0	0	0	10	21	22	3	0	0	0	0	0	0	0
d__Bacteria	k__norank_d__Bacteria	p__Actinobacteriota	c__Actinobacteria	o__Propionibacteriales	f__Nocardioidaceae	g__Nocardioides	s__unclassified_g__Nocardioides	ASV2260	58	6.56204e-05	0	21	0	0	0	0	12	13	0	3	7	2	0	0	0	0
d__Bacteria	k__norank_d__Bacteria	p__Acidobacteriota	c__Acidobacteriae	o__Acidobacteriales	f__Acidobacteriaceae_Subgroup_1	g__Occallatibacter	s__unclassified_g__Occallatibacter	ASV3545	58	6.56204e-05	0	58	0	0	0	0	0	0	0	0	0	0	0	0	0	0
d__Bacteria	k__norank_d__Bacteria	p__Bacteroidota	c__Bacteroidia	o__Bacteroidales	f__M2PB4-65_termite_group	g__norank_f__M2PB4-65_termite_group	s__metagenome_g__norank_f__M2PB4-65_termite_group	ASV2486	57	6.4489e-05	0	0	57	0	0	0	0	0	0	0	0	0	0	0	0	0
d__Bacteria	k__norank_d__Bacteria	p__Bacteroidota	c__Bacteroidia	o__Flavobacteriales	f__Flavobacteriaceae	g__Flavobacterium	s__unclassified_g__Flavobacterium	ASV2485	60	6.78831e-05	0	0	60	0	0	0	0	0	0	0	0	0	0	0	0	0
d__Bacteria	k__norank_d__Bacteria	p__Actinobacteriota	c__Actinobacteria	o__Corynebacteriales	f__Corynebacteriaceae	g__Corynebacterium	s__unclassified_g__Corynebacterium	ASV2150	53	5.99634e-05	53	0	0	0	0	0	0	0	0	0	0	0	0	0	0	0
d__Bacteria	k__norank_d__Bacteria	p__Proteobacteria	c__Alphaproteobacteria	o__Sphingomonadales	f__Sphingomonadaceae	g__Novosphingobium	s__unclassified_g__Novosphingobium	ASV2148	50	5.65693e-05	50	0	0	0	0	0	0	0	0	0	0	0	0	0	0	0
d__Bacteria	k__norank_d__Bacteria	p__Nitrospirota	c__Nitrospiria	o__Nitrospirales	f__Nitrospiraceae	g__Nitrospira	s__unclassified_g__Nitrospira	ASV1713	62	7.01459e-05	0	0	0	62	0	0	0	0	0	0	0	0	0	0	0	0
d__Bacteria	k__norank_d__Bacteria	p__Firmicutes	c__Clostridia	o__Lachnospirales	f__Lachnospiraceae	g__Ruminococcus_torques_group	s__unclassified_g__Ruminococcus_torques_group	ASV1053	58	6.56204e-05	0	0	0	0	0	21	31	0	6	0	0	0	0	0	0	0
d__Bacteria	k__norank_d__Bacteria	p__Proteobacteria	c__Gammaproteobacteria	o__Burkholderiales	f__Rhodocyclaceae	g__Propionivibrio	s__unclassified_g__Propionivibrio	ASV2487	58	6.56204e-05	0	0	58	0	0	0	0	0	0	0	0	0	0	0	0	0
d__Bacteria	k__norank_d__Bacteria	p__Actinobacteriota	c__Actinobacteria	o__Corynebacteriales	f__Mycobacteriaceae	g__Mycobacterium	s__unclassified_g__Mycobacterium	ASV2492	59	6.67517e-05	0	0	56	0	0	0	0	0	0	3	0	0	0	0	0	0
d__Bacteria	k__norank_d__Bacteria	p__Firmicutes	c__Bacilli	o__Bacillales	f__Bacillaceae	g__Bacillus	s__Bacillaceae_bacterium_mt8	ASV1712	60	6.78831e-05	0	0	0	60	0	0	0	0	0	0	0	0	0	0	0	0
d__Bacteria	k__norank_d__Bacteria	p__Proteobacteria	c__Gammaproteobacteria	o__Burkholderiales	f__Rhodocyclaceae	g__Thauera	s__unclassified_g__Thauera	ASV2151	56	6.33576e-05	56	0	0	0	0	0	0	0	0	0	0	0	0	0	0	0
d__Bacteria	k__norank_d__Bacteria	p__Bacteroidota	c__Bacteroidia	o__Chitinophagales	f__Saprospiraceae	g__Phaeodactylibacter	s__unclassified_g__Phaeodactylibacter	ASV2933	62	7.01459e-05	0	0	0	0	0	0	40	22	0	0	0	0	0	0	0	0
d__Bacteria	k__norank_d__Bacteria	p__Bacteroidota	c__Bacteroidia	o__Sphingobacteriales	f__Sphingobacteriaceae	g__Sphingobacterium	s__unclassified_g__Sphingobacterium	ASV1714	61	6.90145e-05	0	0	0	61	0	0	0	0	0	0	0	0	0	0	0	0
d__Bacteria	k__norank_d__Bacteria	p__Actinobacteriota	c__Thermoleophilia	o__Solirubrobacterales	f__67-14	g__norank_f__67-14	s__unclassified_g__norank_f__67-14	ASV3546	54	6.10948e-05	0	54	0	0	0	0	0	0	0	0	0	0	0	0	0	0
d__Bacteria	k__norank_d__Bacteria	p__Myxococcota	c__Polyangia	o__Polyangiales	f__Polyangiaceae	g__Pajaroellobacter	s__unclassified_g__Pajaroellobacter	ASV3547	59	6.67517e-05	0	59	0	0	0	0	0	0	0	0	0	0	0	0	0	0
d__Bacteria	k__norank_d__Bacteria	p__Firmicutes	c__Bacilli	o__Lactobacillales	f__Streptococcaceae	g__Streptococcus	s__unclassified_g__Streptococcus	ASV1058	59	6.67517e-05	0	0	0	0	0	19	40	0	0	0	0	0	0	0	0	0
d__Bacteria	k__norank_d__Bacteria	p__Proteobacteria	c__Gammaproteobacteria	o__unclassified_c__Gammaproteobacteria	f__unclassified_c__Gammaproteobacteria	g__unclassified_c__Gammaproteobacteria	s__unclassified_c__Gammaproteobacteria	ASV1741	58	6.56204e-05	0	0	0	53	0	0	5	0	0	0	0	0	0	0	0	0
d__Bacteria	k__norank_d__Bacteria	p__Actinobacteriota	c__Thermoleophilia	o__Solirubrobacterales	f__Solirubrobacteraceae	g__unclassified_f__Solirubrobacteraceae	s__unclassified_f__Solirubrobacteraceae	ASV2152	53	5.99634e-05	53	0	0	0	0	0	0	0	0	0	0	0	0	0	0	0
d__Bacteria	k__norank_d__Bacteria	p__Proteobacteria	c__Gammaproteobacteria	o__Burkholderiales	f__Rhodocyclaceae	g__Propionivibrio	s__unclassified_g__Propionivibrio	ASV2489	56	6.33576e-05	0	0	56	0	0	0	0	0	0	0	0	0	0	0	0	0
d__Bacteria	k__norank_d__Bacteria	p__Bacteroidota	c__Bacteroidia	o__Bacteroidales	f__Bacteroidaceae	g__Bacteroides	s__gut_metagenome_g__Bacteroides	ASV44	53	5.99634e-05	0	0	0	0	0	0	0	0	0	0	0	0	0	12	41	0
d__Bacteria	k__norank_d__Bacteria	p__Firmicutes	c__Clostridia	o__Oscillospirales	f__Ruminococcaceae	g__norank_f__Ruminococcaceae	s__gut_metagenome_g__norank_f__Ruminococcaceae	ASV400	58	6.56204e-05	0	0	0	0	19	0	0	21	3	5	0	4	0	0	6	0
d__Bacteria	k__norank_d__Bacteria	p__Planctomycetota	c__Phycisphaerae	o__MSBL9	f__KCLunmb-38-53	g__norank_f__KCLunmb-38-53	s__unclassified_g__norank_f__KCLunmb-38-53	ASV2153	53	5.99634e-05	53	0	0	0	0	0	0	0	0	0	0	0	0	0	0	0
d__Bacteria	k__norank_d__Bacteria	p__Proteobacteria	c__Alphaproteobacteria	o__Acetobacterales	f__Acetobacteraceae	g__unclassified_f__Acetobacteraceae	s__unclassified_f__Acetobacteraceae	ASV3548	59	6.67517e-05	0	59	0	0	0	0	0	0	0	0	0	0	0	0	0	0
d__Bacteria	k__norank_d__Bacteria	p__Firmicutes	c__Clostridia	o__Peptostreptococcales-Tissierellales	f__Anaerovoracaceae	g__unclassified_f__Anaerovoracaceae	s__unclassified_f__Anaerovoracaceae	ASV2490	56	6.33576e-05	0	0	56	0	0	0	0	0	0	0	0	0	0	0	0	0
d__Bacteria	k__norank_d__Bacteria	p__Firmicutes	c__Clostridia	o__Christensenellales	f__Christensenellaceae	g__Christensenellaceae_R-7_group	s__unclassified_g__Christensenellaceae_R-7_group	ASV289	55	6.22262e-05	0	0	0	0	0	0	53	0	0	0	0	0	0	2	0	0
d__Bacteria	k__norank_d__Bacteria	p__Proteobacteria	c__Alphaproteobacteria	o__Acetobacterales	f__Acetobacteraceae	g__unclassified_f__Acetobacteraceae	s__unclassified_f__Acetobacteraceae	ASV3549	56	6.33576e-05	0	56	0	0	0	0	0	0	0	0	0	0	0	0	0	0
d__Bacteria	k__norank_d__Bacteria	p__Proteobacteria	c__Alphaproteobacteria	o__Sphingomonadales	f__Sphingomonadaceae	g__Sphingomonas	s__unclassified_g__Sphingomonas	ASV1718	58	6.56204e-05	0	0	0	58	0	0	0	0	0	0	0	0	0	0	0	0
d__Bacteria	k__norank_d__Bacteria	p__Actinobacteriota	c__Actinobacteria	o__Micrococcales	f__Demequinaceae	g__unclassified_f__Demequinaceae	s__unclassified_f__Demequinaceae	ASV4735	52	5.8832e-05	0	0	0	0	0	0	0	52	0	0	0	0	0	0	0	0
d__Bacteria	k__norank_d__Bacteria	p__Acidobacteriota	c__Holophagae	o__Holophagales	f__Holophagaceae	g__norank_f__Holophagaceae	s__uncultured_bacterium_g__norank_f__Holophagaceae	ASV2156	49	5.54379e-05	49	0	0	0	0	0	0	0	0	0	0	0	0	0	0	0
d__Bacteria	k__norank_d__Bacteria	p__Firmicutes	c__Clostridia	o__Oscillospirales	f__Ruminococcaceae	g__Anaerofilum	s__unclassified_g__Anaerofilum	ASV2503	55	6.22262e-05	0	0	50	0	0	0	0	5	0	0	0	0	0	0	0	0
d__Bacteria	k__norank_d__Bacteria	p__Proteobacteria	c__Gammaproteobacteria	o__Enterobacterales	f__Enterobacteriaceae	g__Klebsiella	s__unclassified_g__Klebsiella	ASV2491	56	6.33576e-05	0	0	56	0	0	0	0	0	0	0	0	0	0	0	0	0
d__Bacteria	k__norank_d__Bacteria	p__Proteobacteria	c__Alphaproteobacteria	o__Caulobacterales	f__Caulobacteraceae	g__Brevundimonas	s__unclassified_g__Brevundimonas	ASV1759	58	6.56204e-05	0	0	0	48	0	0	0	4	0	0	0	0	0	0	6	0
d__Bacteria	k__norank_d__Bacteria	p__Firmicutes	c__Clostridia	o__Oscillospirales	f__Ruminococcaceae	g__Subdoligranulum	s__unclassified_g__Subdoligranulum	ASV1033	56	6.33576e-05	0	0	14	0	0	31	0	10	0	0	0	0	1	0	0	0
d__Bacteria	k__norank_d__Bacteria	p__Actinobacteriota	c__Actinobacteria	o__Corynebacteriales	f__Corynebacteriaceae	g__Corynebacterium	s__unclassified_g__Corynebacterium	ASV2154	54	6.10948e-05	54	0	0	0	0	0	0	0	0	0	0	0	0	0	0	0
d__Bacteria	k__norank_d__Bacteria	p__Proteobacteria	c__Gammaproteobacteria	o__Burkholderiales	f__Rhodocyclaceae	g__unclassified_f__Rhodocyclaceae	s__unclassified_f__Rhodocyclaceae	ASV2155	49	5.54379e-05	49	0	0	0	0	0	0	0	0	0	0	0	0	0	0	0
d__Bacteria	k__norank_d__Bacteria	p__Actinobacteriota	c__Actinobacteria	o__Frankiales	f__Geodermatophilaceae	g__Geodermatophilus	s__unclassified_g__Geodermatophilus	ASV649	57	6.4489e-05	0	0	0	0	6	13	0	0	3	0	4	31	0	0	0	0
d__Bacteria	k__norank_d__Bacteria	p__Acidobacteriota	c__Acidobacteriae	o__Acidobacteriales	f__Acidobacteriaceae_Subgroup_1	g__Occallatibacter	s__unclassified_g__Occallatibacter	ASV3582	56	6.33576e-05	0	50	0	0	0	0	0	0	0	0	0	0	0	0	6	0
d__Bacteria	k__norank_d__Bacteria	p__Actinobacteriota	c__Actinobacteria	o__Pseudonocardiales	f__Pseudonocardiaceae	g__Saccharomonospora	s__unclassified_g__Saccharomonospora	ASV676	58	6.56204e-05	0	0	0	0	5	3	0	50	0	0	0	0	0	0	0	0
d__Bacteria	k__norank_d__Bacteria	p__Bacteroidota	c__Bacteroidia	o__Sphingobacteriales	f__AKYH767	g__norank_f__AKYH767	s__Bacteroidetes_bacterium_OLB10	ASV1716	58	6.56204e-05	0	0	0	58	0	0	0	0	0	0	0	0	0	0	0	0
d__Bacteria	k__norank_d__Bacteria	p__Actinobacteriota	c__Actinobacteria	o__Propionibacteriales	f__Nocardioidaceae	g__Marmoricola	s__unclassified_g__Marmoricola	ASV1233	56	6.33576e-05	0	17	0	0	0	7	0	32	0	0	0	0	0	0	0	0
d__Bacteria	k__norank_d__Bacteria	p__Actinobacteriota	c__Actinobacteria	o__Catenulisporales	f__Actinospicaceae	g__Actinospica	s__unclassified_g__Actinospica	ASV3550	57	6.4489e-05	0	57	0	0	0	0	0	0	0	0	0	0	0	0	0	0
d__Bacteria	k__norank_d__Bacteria	p__Firmicutes	c__Bacilli	o__Paenibacillales	f__Paenibacillaceae	g__Paenibacillus	s__unclassified_g__Paenibacillus	ASV1717	54	6.10948e-05	0	0	0	54	0	0	0	0	0	0	0	0	0	0	0	0
d__Bacteria	k__norank_d__Bacteria	p__Firmicutes	c__Clostridia	o__Oscillospirales	f__Ruminococcaceae	g__Faecalibacterium	s__unclassified_g__Faecalibacterium	ASV1140	56	6.33576e-05	0	0	0	0	0	11	33	0	0	0	0	0	0	0	12	0
d__Bacteria	k__norank_d__Bacteria	p__Proteobacteria	c__Alphaproteobacteria	o__Micropepsales	f__Micropepsaceae	g__norank_f__Micropepsaceae	s__uncultured_bacterium_g__norank_f__Micropepsaceae	ASV2552	55	6.22262e-05	0	13	42	0	0	0	0	0	0	0	0	0	0	0	0	0
d__Bacteria	k__norank_d__Bacteria	p__Proteobacteria	c__Gammaproteobacteria	o__Enterobacterales	f__Erwiniaceae	g__unclassified_f__Erwiniaceae	s__unclassified_f__Erwiniaceae	ASV1723	57	6.4489e-05	0	0	0	57	0	0	0	0	0	0	0	0	0	0	0	0
d__Bacteria	k__norank_d__Bacteria	p__Desulfobacterota	c__Desulfovibrionia	o__Desulfovibrionales	f__Desulfomicrobiaceae	g__Desulfomicrobium	s__unclassified_g__Desulfomicrobium	ASV2161	48	5.43065e-05	48	0	0	0	0	0	0	0	0	0	0	0	0	0	0	0
d__Bacteria	k__norank_d__Bacteria	p__Proteobacteria	c__Alphaproteobacteria	o__Sphingomonadales	f__Sphingomonadaceae	g__Sphingomonas	s__unclassified_g__Sphingomonas	ASV1721	53	5.99634e-05	0	0	0	53	0	0	0	0	0	0	0	0	0	0	0	0
d__Bacteria	k__norank_d__Bacteria	p__Proteobacteria	c__Alphaproteobacteria	o__Kiloniellales	f__Fodinicurvataceae	g__norank_f__Fodinicurvataceae	s__uncultured_Rhodospirillaceae_bacterium_g__norank_f__Fodinicurvataceae	ASV4736	52	5.8832e-05	0	0	0	0	0	0	0	52	0	0	0	0	0	0	0	0
d__Bacteria	k__norank_d__Bacteria	p__Proteobacteria	c__Alphaproteobacteria	o__Sphingomonadales	f__Sphingomonadaceae	g__DSSF69	s__Hankyongella_aquatica	ASV1720	55	6.22262e-05	0	0	0	55	0	0	0	0	0	0	0	0	0	0	0	0
d__Bacteria	k__norank_d__Bacteria	p__Firmicutes	c__Bacilli	o__Lactobacillales	f__Lactobacillaceae	g__Lactobacillus	s__unclassified_g__Lactobacillus	ASV2166	57	6.4489e-05	53	0	0	0	0	0	4	0	0	0	0	0	0	0	0	0
d__Bacteria	k__norank_d__Bacteria	p__Bacteroidota	c__Bacteroidia	o__Bacteroidales	f__Tannerellaceae	g__Parabacteroides	s__Parabacteroides_sp.	ASV1722	55	6.22262e-05	0	0	0	55	0	0	0	0	0	0	0	0	0	0	0	0
d__Bacteria	k__norank_d__Bacteria	p__Actinobacteriota	c__Actinobacteria	o__Micrococcales	f__Bogoriellaceae	g__Georgenia	s__uncultured_bacterium_g__Georgenia	ASV2501	50	5.65693e-05	0	0	48	0	0	0	0	0	0	0	0	0	2	0	0	0
d__Bacteria	k__norank_d__Bacteria	p__Bacteroidota	c__Bacteroidia	o__Bacteroidales	f__Prolixibacteraceae	g__WCHB1-32	s__unclassified_g__WCHB1-32	ASV1724	55	6.22262e-05	0	0	0	55	0	0	0	0	0	0	0	0	0	0	0	0
d__Bacteria	k__norank_d__Bacteria	p__Proteobacteria	c__Alphaproteobacteria	o__Sphingomonadales	f__Sphingomonadaceae	g__unclassified_f__Sphingomonadaceae	s__unclassified_f__Sphingomonadaceae	ASV2160	51	5.77007e-05	51	0	0	0	0	0	0	0	0	0	0	0	0	0	0	0
d__Bacteria	k__norank_d__Bacteria	p__Proteobacteria	c__Alphaproteobacteria	o__Rhizobiales	f__Rhizobiaceae	g__unclassified_f__Rhizobiaceae	s__unclassified_f__Rhizobiaceae	ASV2158	54	6.10948e-05	54	0	0	0	0	0	0	0	0	0	0	0	0	0	0	0
d__Bacteria	k__norank_d__Bacteria	p__Actinobacteriota	c__Actinobacteria	o__Propionibacteriales	f__Propionibacteriaceae	g__Micropruina	s__unclassified_g__Micropruina	ASV2157	53	5.99634e-05	53	0	0	0	0	0	0	0	0	0	0	0	0	0	0	0
d__Bacteria	k__norank_d__Bacteria	p__Proteobacteria	c__Gammaproteobacteria	o__Burkholderiales	f__Neisseriaceae	g__Neisseria	s__unclassified_g__Neisseria	ASV1719	51	5.77007e-05	0	0	0	51	0	0	0	0	0	0	0	0	0	0	0	0
d__Bacteria	k__norank_d__Bacteria	p__Bacteroidota	c__Bacteroidia	o__Bacteroidales	f__Paludibacteraceae	g__norank_f__Paludibacteraceae	s__unclassified_g__norank_f__Paludibacteraceae	ASV2493	49	5.54379e-05	0	0	49	0	0	0	0	0	0	0	0	0	0	0	0	0
d__Bacteria	k__norank_d__Bacteria	p__Firmicutes	c__Clostridia	o__norank_c__Clostridia	f__Hungateiclostridiaceae	g__Ruminiclostridium	s__unclassified_g__Ruminiclostridium	ASV2159	54	6.10948e-05	54	0	0	0	0	0	0	0	0	0	0	0	0	0	0	0
d__Bacteria	k__norank_d__Bacteria	p__Spirochaetota	c__Spirochaetia	o__Spirochaetales	f__Spirochaetaceae	g__Treponema	s__unclassified_g__Treponema	ASV1725	50	5.65693e-05	0	0	0	50	0	0	0	0	0	0	0	0	0	0	0	0
d__Bacteria	k__norank_d__Bacteria	p__Proteobacteria	c__Alphaproteobacteria	o__Micropepsales	f__Micropepsaceae	g__norank_f__Micropepsaceae	s__unclassified_g__norank_f__Micropepsaceae	ASV2496	52	5.8832e-05	0	0	52	0	0	0	0	0	0	0	0	0	0	0	0	0
d__Bacteria	k__norank_d__Bacteria	p__Acidobacteriota	c__Acidobacteriae	o__Subgroup_2	f__norank_o__Subgroup_2	g__norank_f__norank_o__Subgroup_2	s__unclassified_g__norank_f__norank_o__Subgroup_2	ASV3551	56	6.33576e-05	0	56	0	0	0	0	0	0	0	0	0	0	0	0	0	0
d__Bacteria	k__norank_d__Bacteria	p__Chloroflexi	c__Chloroflexia	o__Chloroflexales	f__Roseiflexaceae	g__norank_f__Roseiflexaceae	s__uncultured_bacterium_g__norank_f__Roseiflexaceae	ASV480	57	6.4489e-05	0	0	0	0	9	18	22	5	0	0	0	0	3	0	0	0
d__Bacteria	k__norank_d__Bacteria	p__Proteobacteria	c__Gammaproteobacteria	o__Burkholderiales	f__Nitrosomonadaceae	g__Ellin6067	s__unclassified_g__Ellin6067	ASV1729	56	6.33576e-05	0	0	0	56	0	0	0	0	0	0	0	0	0	0	0	0
d__Bacteria	k__norank_d__Bacteria	p__Bacteroidota	c__Bacteroidia	o__Bacteroidales	f__Paludibacteraceae	g__Paludibacter	s__unclassified_g__Paludibacter	ASV2495	51	5.77007e-05	0	0	51	0	0	0	0	0	0	0	0	0	0	0	0	0
d__Bacteria	k__norank_d__Bacteria	p__Bacteroidota	c__Bacteroidia	o__Chitinophagales	f__Saprospiraceae	g__norank_f__Saprospiraceae	s__uncultured_Saprospiraceae_bacterium_g__norank	ASV1727	50	5.65693e-05	0	0	0	50	0	0	0	0	0	0	0	0	0	0	0	0
d__Bacteria	k__norank_d__Bacteria	p__Proteobacteria	c__Gammaproteobacteria	o__Burkholderiales	f__Rhodocyclaceae	g__unclassified_f__Rhodocyclaceae	s__unclassified_f__Rhodocyclaceae	ASV1731	56	6.33576e-05	0	0	0	56	0	0	0	0	0	0	0	0	0	0	0	0
d__Bacteria	k__norank_d__Bacteria	p__Proteobacteria	c__Alphaproteobacteria	o__Rhizobiales	f__Rhizobiaceae	g__Mesorhizobium	s__unclassified_g__Mesorhizobium	ASV1728	58	6.56204e-05	0	0	0	58	0	0	0	0	0	0	0	0	0	0	0	0
d__Bacteria	k__norank_d__Bacteria	p__Bacteroidota	c__Bacteroidia	o__Bacteroidales	f__unclassified_o__Bacteroidales	g__unclassified_o__Bacteroidales	s__unclassified_o__Bacteroidales	ASV2577	50	5.65693e-05	0	0	37	0	0	0	0	13	0	0	0	0	0	0	0	0
d__Bacteria	k__norank_d__Bacteria	p__Bacteroidota	c__Bacteroidia	o__Flavobacteriales	f__Weeksellaceae	g__Chryseobacterium	s__unclassified_g__Chryseobacterium	ASV1726	56	6.33576e-05	0	0	0	56	0	0	0	0	0	0	0	0	0	0	0	0
d__Bacteria	k__norank_d__Bacteria	p__Firmicutes	c__Bacilli	o__Bacillales	f__Planococcaceae	g__unclassified_f__Planococcaceae	s__unclassified_f__Planococcaceae	ASV1159	55	6.22262e-05	0	0	47	0	0	8	0	0	0	0	0	0	0	0	0	0
d__Bacteria	k__norank_d__Bacteria	p__Proteobacteria	c__Gammaproteobacteria	o__Pseudomonadales	f__Pseudomonadaceae	g__Pseudomonas	s__unclassified_g__Pseudomonas	ASV2494	57	6.4489e-05	0	0	57	0	0	0	0	0	0	0	0	0	0	0	0	0
d__Bacteria	k__norank_d__Bacteria	p__Proteobacteria	c__Gammaproteobacteria	o__Burkholderiales	f__Rhodocyclaceae	g__Propionivibrio	s__unclassified_g__Propionivibrio	ASV1757	56	6.33576e-05	0	0	0	51	0	0	0	5	0	0	0	0	0	0	0	0
d__Bacteria	k__norank_d__Bacteria	p__Firmicutes	c__Clostridia	o__Lachnospirales	f__Lachnospiraceae	g__Eubacterium_hallii_group	s__unclassified_g__Eubacterium_hallii_group	ASV373	53	5.99634e-05	0	0	0	0	31	0	0	22	0	0	0	0	0	0	0	0
d__Bacteria	k__norank_d__Bacteria	p__Acidobacteriota	c__Acidobacteriae	o__Solibacterales	f__Solibacteraceae	g__Candidatus_Solibacter	s__unclassified_g__Candidatus_Solibacter	ASV3553	55	6.22262e-05	0	55	0	0	0	0	0	0	0	0	0	0	0	0	0	0
d__Bacteria	k__norank_d__Bacteria	p__Proteobacteria	c__Gammaproteobacteria	o__Enterobacterales	f__Erwiniaceae	g__unclassified_f__Erwiniaceae	s__unclassified_f__Erwiniaceae	ASV2162	48	5.43065e-05	48	0	0	0	0	0	0	0	0	0	0	0	0	0	0	0
d__Bacteria	k__norank_d__Bacteria	p__Acidobacteriota	c__Acidobacteriae	o__Subgroup_2	f__norank_o__Subgroup_2	g__norank_f__norank_o__Subgroup_2	s__uncultured_Holophaga_sp._g__norank_f__norank_o__Subgroup_2	ASV3554	51	5.77007e-05	0	51	0	0	0	0	0	0	0	0	0	0	0	0	0	0
d__Bacteria	k__norank_d__Bacteria	p__Proteobacteria	c__Gammaproteobacteria	o__Pseudomonadales	f__Pseudomonadaceae	g__Pseudomonas	s__unclassified_g__Pseudomonas	ASV2200	51	5.77007e-05	26	0	0	0	0	0	0	14	0	0	4	0	0	0	7	0
d__Bacteria	k__norank_d__Bacteria	p__Bacteroidota	c__Bacteroidia	o__Bacteroidales	f__Prevotellaceae	g__Paraprevotella	s__unclassified_g__Paraprevotella	ASV434	52	5.8832e-05	0	0	0	0	15	37	0	0	0	0	0	0	0	0	0	0
d__Bacteria	k__norank_d__Bacteria	p__Bacteroidota	c__Bacteroidia	o__Bacteroidales	f__Prevotellaceae	g__unclassified_f__Prevotellaceae	s__unclassified_f__Prevotellaceae	ASV2500	55	6.22262e-05	0	0	55	0	0	0	0	0	0	0	0	0	0	0	0	0
d__Bacteria	k__norank_d__Bacteria	p__Proteobacteria	c__Gammaproteobacteria	o__Enterobacterales	f__Enterobacteriaceae	g__Enterobacter	s__unclassified_g__Enterobacter	ASV2497	50	5.65693e-05	0	0	50	0	0	0	0	0	0	0	0	0	0	0	0	0
d__Bacteria	k__norank_d__Bacteria	p__Actinobacteriota	c__Actinobacteria	o__Frankiales	f__Acidothermaceae	g__Acidothermus	s__unclassified_g__Acidothermus	ASV3552	53	5.99634e-05	0	53	0	0	0	0	0	0	0	0	0	0	0	0	0	0
d__Bacteria	k__norank_d__Bacteria	p__Actinobacteriota	c__Actinobacteria	o__Pseudonocardiales	f__Pseudonocardiaceae	g__Pseudonocardia	s__unclassified_g__Pseudonocardia	ASV273	53	5.99634e-05	0	0	0	44	0	6	0	0	0	0	0	0	0	3	0	0
d__Bacteria	k__norank_d__Bacteria	p__Proteobacteria	c__Gammaproteobacteria	o__Enterobacterales	f__Enterobacteriaceae	g__unclassified_f__Enterobacteriaceae	s__unclassified_f__Enterobacteriaceae	ASV1732	56	6.33576e-05	0	0	0	56	0	0	0	0	0	0	0	0	0	0	0	0
d__Bacteria	k__norank_d__Bacteria	p__Proteobacteria	c__Alphaproteobacteria	o__Elsterales	f__norank_o__Elsterales	g__norank_f__norank_o__Elsterales	s__unclassified_g__norank_f__norank_o__Elsterales	ASV3555	57	6.4489e-05	0	57	0	0	0	0	0	0	0	0	0	0	0	0	0	0
d__Bacteria	k__norank_d__Bacteria	p__Proteobacteria	c__Gammaproteobacteria	o__Burkholderiales	f__Rhodocyclaceae	g__unclassified_f__Rhodocyclaceae	s__unclassified_f__Rhodocyclaceae	ASV2163	48	5.43065e-05	48	0	0	0	0	0	0	0	0	0	0	0	0	0	0	0
d__Bacteria	k__norank_d__Bacteria	p__Proteobacteria	c__Alphaproteobacteria	o__Sphingomonadales	f__Sphingomonadaceae	g__Sphingomonas	s__unclassified_g__Sphingomonas	ASV1208	54	6.10948e-05	0	0	46	0	0	8	0	0	0	0	0	0	0	0	0	0
d__Bacteria	k__norank_d__Bacteria	p__Firmicutes	c__Clostridia	o__Clostridiales	f__Clostridiaceae	g__Clostridium_sensu_stricto_1	s__unclassified_g__Clostridium_sensu_stricto_1	ASV1736	56	6.33576e-05	0	0	0	56	0	0	0	0	0	0	0	0	0	0	0	0
d__Bacteria	k__norank_d__Bacteria	p__Actinobacteriota	c__Thermoleophilia	o__Gaiellales	f__Gaiellaceae	g__Gaiella	s__uncultured_Acidimicrobiia_bacterium_g__Gaiella	ASV1117	52	5.8832e-05	0	0	41	0	0	11	0	0	0	0	0	0	0	0	0	0
d__Bacteria	k__norank_d__Bacteria	p__Firmicutes	c__Clostridia	o__Lachnospirales	f__Lachnospiraceae	g__unclassified_f__Lachnospiraceae	s__unclassified_f__Lachnospiraceae	ASV2499	54	6.10948e-05	0	0	54	0	0	0	0	0	0	0	0	0	0	0	0	0
d__Bacteria	k__norank_d__Bacteria	p__Proteobacteria	c__Gammaproteobacteria	o__Burkholderiales	f__Comamonadaceae	g__Aquabacterium	s__unclassified_g__Aquabacterium	ASV1734	54	6.10948e-05	0	0	0	54	0	0	0	0	0	0	0	0	0	0	0	0
d__Bacteria	k__norank_d__Bacteria	p__Bacteroidota	c__Bacteroidia	o__Flavobacteriales	f__Flavobacteriaceae	g__Flavobacterium	s__unclassified_g__Flavobacterium	ASV1737	57	6.4489e-05	0	0	0	57	0	0	0	0	0	0	0	0	0	0	0	0
d__Bacteria	k__norank_d__Bacteria	p__Proteobacteria	c__Gammaproteobacteria	o__Burkholderiales	f__Oxalobacteraceae	g__Noviherbaspirillum	s__unclassified_g__Noviherbaspirillum	ASV1881	53	5.99634e-05	0	26	0	27	0	0	0	0	0	0	0	0	0	0	0	0
d__Bacteria	k__norank_d__Bacteria	p__Proteobacteria	c__Gammaproteobacteria	o__Burkholderiales	f__Rhodocyclaceae	g__unclassified_f__Rhodocyclaceae	s__unclassified_f__Rhodocyclaceae	ASV2635	53	5.99634e-05	0	20	33	0	0	0	0	0	0	0	0	0	0	0	0	0
d__Bacteria	k__norank_d__Bacteria	p__Actinobacteriota	c__Actinobacteria	o__Micrococcales	f__unclassified_o__Micrococcales	g__unclassified_o__Micrococcales	s__unclassified_o__Micrococcales	ASV2498	54	6.10948e-05	0	0	54	0	0	0	0	0	0	0	0	0	0	0	0	0
d__Bacteria	k__norank_d__Bacteria	p__Proteobacteria	c__Gammaproteobacteria	o__Xanthomonadales	f__Xanthomonadaceae	g__unclassified_f__Xanthomonadaceae	s__unclassified_f__Xanthomonadaceae	ASV1739	53	5.99634e-05	0	0	0	53	0	0	0	0	0	0	0	0	0	0	0	0
d__Bacteria	k__norank_d__Bacteria	p__Chloroflexi	c__Ktedonobacteria	o__Ktedonobacterales	f__Ktedonobacteraceae	g__FCPS473	s__uncultured_Thermosporotrichaceae_bacterium_g__FCPS473	ASV3556	53	5.99634e-05	0	53	0	0	0	0	0	0	0	0	0	0	0	0	0	0
d__Bacteria	k__norank_d__Bacteria	p__Bacteroidota	c__Bacteroidia	o__Bacteroidales	f__Bacteroidaceae	g__Bacteroides	s__Bacteroides_massiliensis	ASV348	46	5.20437e-05	0	0	0	0	43	0	0	0	0	0	0	0	3	0	0	0
d__Bacteria	k__norank_d__Bacteria	p__Firmicutes	c__Clostridia	o__Oscillospirales	f__Eubacterium_coprostanoligenes_group	g__norank_f__Eubacterium_coprostanoligenes_group	s__unclassified_g__norank_f__Eubacterium_coprostanoligenes_group	ASV80	52	5.8832e-05	0	0	0	0	14	7	19	3	0	0	0	0	0	9	0	0
d__Bacteria	k__norank_d__Bacteria	p__Desulfobacterota	c__Desulfobulbia	o__Desulfobulbales	f__Desulfobulbaceae	g__Desulfobulbus	s__unclassified_g__Desulfobulbus	ASV1740	55	6.22262e-05	0	0	0	55	0	0	0	0	0	0	0	0	0	0	0	0
d__Bacteria	k__norank_d__Bacteria	p__Firmicutes	c__Clostridia	o__Lachnospirales	f__Lachnospiraceae	g__unclassified_f__Lachnospiraceae	s__unclassified_f__Lachnospiraceae	ASV2600	54	6.10948e-05	0	0	37	0	0	0	17	0	0	0	0	0	0	0	0	0
d__Bacteria	k__norank_d__Bacteria	p__Acidobacteriota	c__Acidobacteriae	o__Acidobacteriales	f__Acidobacteriaceae_Subgroup_1	g__Edaphobacter	s__unclassified_g__Edaphobacter	ASV3559	56	6.33576e-05	0	56	0	0	0	0	0	0	0	0	0	0	0	0	0	0
d__Bacteria	k__norank_d__Bacteria	p__Acidobacteriota	c__Acidobacteriae	o__Solibacterales	f__Solibacteraceae	g__Candidatus_Solibacter	s__unclassified_g__Candidatus_Solibacter	ASV3557	53	5.99634e-05	0	53	0	0	0	0	0	0	0	0	0	0	0	0	0	0
d__Bacteria	k__norank_d__Bacteria	p__Acidobacteriota	c__Acidobacteriae	o__Acidobacteriales	f__norank_o__Acidobacteriales	g__norank_f__norank_o__Acidobacteriales	s__unclassified_g__norank_f__norank_o__Acidobacteriales	ASV3558	56	6.33576e-05	0	56	0	0	0	0	0	0	0	0	0	0	0	0	0	0
d__Bacteria	k__norank_d__Bacteria	p__Actinobacteriota	c__Thermoleophilia	o__Solirubrobacterales	f__Solirubrobacteraceae	g__unclassified_f__Solirubrobacteraceae	s__unclassified_f__Solirubrobacteraceae	ASV3560	56	6.33576e-05	0	56	0	0	0	0	0	0	0	0	0	0	0	0	0	0
d__Bacteria	k__norank_d__Bacteria	p__Proteobacteria	c__Alphaproteobacteria	o__Rhizobiales	f__Xanthobacteraceae	g__unclassified_f__Xanthobacteraceae	s__unclassified_f__Xanthobacteraceae	ASV3561	54	6.10948e-05	0	54	0	0	0	0	0	0	0	0	0	0	0	0	0	0
d__Bacteria	k__norank_d__Bacteria	p__Proteobacteria	c__Gammaproteobacteria	o__Burkholderiales	f__Comamonadaceae	g__unclassified_f__Comamonadaceae	s__unclassified_f__Comamonadaceae	ASV2210	51	5.77007e-05	16	35	0	0	0	0	0	0	0	0	0	0	0	0	0	0
d__Bacteria	k__norank_d__Bacteria	p__Bacteroidota	c__Bacteroidia	o__Bacteroidales	f__Prevotellaceae	g__Paraprevotella	s__unclassified_g__Paraprevotella	ASV25	48	5.43065e-05	0	0	0	0	9	10	10	0	0	0	0	0	0	19	0	0
d__Bacteria	k__norank_d__Bacteria	p__Actinobacteriota	c__Acidimicrobiia	o__IMCC26256	f__norank_o__IMCC26256	g__norank_f__norank_o__IMCC26256	s__bacterium_enrichment_culture_clone_auto73_4W	ASV3562	52	5.8832e-05	0	52	0	0	0	0	0	0	0	0	0	0	0	0	0	0
d__Bacteria	k__norank_d__Bacteria	p__Proteobacteria	c__Gammaproteobacteria	o__Enterobacterales	f__Enterobacteriaceae	g__unclassified_f__Enterobacteriaceae	s__unclassified_f__Enterobacteriaceae	ASV2164	47	5.31751e-05	47	0	0	0	0	0	0	0	0	0	0	0	0	0	0	0
d__Bacteria	k__norank_d__Bacteria	p__Proteobacteria	c__Gammaproteobacteria	o__Burkholderiales	f__Rhodocyclaceae	g__unclassified_f__Rhodocyclaceae	s__unclassified_f__Rhodocyclaceae	ASV2502	54	6.10948e-05	0	0	54	0	0	0	0	0	0	0	0	0	0	0	0	0
d__Bacteria	k__norank_d__Bacteria	p__Firmicutes	c__Clostridia	o__Monoglobales	f__Monoglobaceae	g__Monoglobus	s__unclassified_g__Monoglobus	ASV412	52	5.8832e-05	0	0	0	0	18	5	26	0	0	0	3	0	0	0	0	0
d__Bacteria	k__norank_d__Bacteria	p__Actinobacteriota	c__Actinobacteria	o__Pseudonocardiales	f__Pseudonocardiaceae	g__Actinomycetospora	s__unclassified_g__Actinomycetospora	ASV543	50	5.65693e-05	0	0	19	0	7	3	0	0	4	7	4	0	6	0	0	0
d__Bacteria	k__norank_d__Bacteria	p__Firmicutes	c__Clostridia	o__Peptostreptococcales-Tissierellales	f__Anaerovoracaceae	g__unclassified_f__Anaerovoracaceae	s__unclassified_f__Anaerovoracaceae	ASV2506	53	5.99634e-05	0	0	53	0	0	0	0	0	0	0	0	0	0	0	0	0
d__Bacteria	k__norank_d__Bacteria	p__Firmicutes	c__Bacilli	o__Staphylococcales	f__Staphylococcaceae	g__Jeotgalicoccus	s__unclassified_g__Jeotgalicoccus	ASV2167	47	5.31751e-05	47	0	0	0	0	0	0	0	0	0	0	0	0	0	0	0
d__Bacteria	k__norank_d__Bacteria	p__Proteobacteria	c__Alphaproteobacteria	o__Micavibrionales	f__norank_o__Micavibrionales	g__norank_f__norank_o__Micavibrionales	s__Alphaproteobacteria_bacterium_CG1_02_46_17	ASV1886	53	5.99634e-05	0	0	24	29	0	0	0	0	0	0	0	0	0	0	0	0
d__Bacteria	k__norank_d__Bacteria	p__Acidobacteriota	c__Acidobacteriae	o__Subgroup_2	f__norank_o__Subgroup_2	g__norank_f__norank_o__Subgroup_2	s__uncultured_Holophaga_sp._g__norank_f__norank_o__Subgroup_2	ASV3564	53	5.99634e-05	0	53	0	0	0	0	0	0	0	0	0	0	0	0	0	0
d__Bacteria	k__norank_d__Bacteria	p__Firmicutes	c__Clostridia	o__Lachnospirales	f__Lachnospiraceae	g__unclassified_f__Lachnospiraceae	s__unclassified_f__Lachnospiraceae	ASV1743	55	6.22262e-05	0	0	0	55	0	0	0	0	0	0	0	0	0	0	0	0
d__Bacteria	k__norank_d__Bacteria	p__Proteobacteria	c__Alphaproteobacteria	o__Rhizobiales	f__Xanthobacteraceae	g__unclassified_f__Xanthobacteraceae	s__unclassified_f__Xanthobacteraceae	ASV3563	50	5.65693e-05	0	50	0	0	0	0	0	0	0	0	0	0	0	0	0	0
d__Bacteria	k__norank_d__Bacteria	p__Proteobacteria	c__Gammaproteobacteria	o__Burkholderiales	f__Rhodocyclaceae	g__unclassified_f__Rhodocyclaceae	s__unclassified_f__Rhodocyclaceae	ASV2507	47	5.31751e-05	0	0	47	0	0	0	0	0	0	0	0	0	0	0	0	0
d__Bacteria	k__norank_d__Bacteria	p__Actinobacteriota	c__Actinobacteria	o__Frankiales	f__Acidothermaceae	g__Acidothermus	s__uncultured_bacterium_g__Acidothermus	ASV3567	52	5.8832e-05	0	52	0	0	0	0	0	0	0	0	0	0	0	0	0	0
d__Bacteria	k__norank_d__Bacteria	p__Proteobacteria	c__Alphaproteobacteria	o__Caulobacterales	f__Caulobacteraceae	g__norank_f__Caulobacteraceae	s__unclassified_g__norank_f__Caulobacteraceae	ASV1830	53	5.99634e-05	0	16	0	37	0	0	0	0	0	0	0	0	0	0	0	0
d__Bacteria	k__norank_d__Bacteria	p__Actinobacteriota	c__Thermoleophilia	o__Solirubrobacterales	f__Solirubrobacteraceae	g__norank_f__Solirubrobacteraceae	s__unclassified_g__norank_f__Solirubrobacteraceae	ASV3566	48	5.43065e-05	0	48	0	0	0	0	0	0	0	0	0	0	0	0	0	0
d__Bacteria	k__norank_d__Bacteria	p__Proteobacteria	c__Gammaproteobacteria	o__Enterobacterales	f__Yersiniaceae	g__Serratia	s__unclassified_g__Serratia	ASV1744	52	5.8832e-05	0	0	0	52	0	0	0	0	0	0	0	0	0	0	0	0
d__Bacteria	k__norank_d__Bacteria	p__Proteobacteria	c__Alphaproteobacteria	o__Sphingomonadales	f__Sphingomonadaceae	g__Sphingomonas	s__unclassified_g__Sphingomonas	ASV3565	53	5.99634e-05	0	53	0	0	0	0	0	0	0	0	0	0	0	0	0	0
d__Bacteria	k__norank_d__Bacteria	p__Proteobacteria	c__Gammaproteobacteria	o__Pseudomonadales	f__Pseudomonadaceae	g__Pseudomonas	s__unclassified_g__Pseudomonas	ASV1745	49	5.54379e-05	0	0	0	49	0	0	0	0	0	0	0	0	0	0	0	0
d__Bacteria	k__norank_d__Bacteria	p__Proteobacteria	c__Gammaproteobacteria	o__Gammaproteobacteria_Incertae_Sedis	f__unclassified_o__Gammaproteobacteria_Incertae_Sedis	g__Acidibacter	s__unclassified_g__Acidibacter	ASV3568	50	5.65693e-05	0	50	0	0	0	0	0	0	0	0	0	0	0	0	0	0
d__Bacteria	k__norank_d__Bacteria	p__Proteobacteria	c__Gammaproteobacteria	o__Burkholderiales	f__Rhodocyclaceae	g__Propionivibrio	s__uncultured_bacterium_g__Propionivibrio	ASV2504	49	5.54379e-05	0	0	49	0	0	0	0	0	0	0	0	0	0	0	0	0
d__Bacteria	k__norank_d__Bacteria	p__Chloroflexi	c__Ktedonobacteria	o__Ktedonobacterales	f__JG30-KF-AS9	g__norank_f__JG30-KF-AS9	s__uncultured_bacterium_g__norank_f__JG30-KF-AS9	ASV2170	51	5.77007e-05	51	0	0	0	0	0	0	0	0	0	0	0	0	0	0	0
d__Bacteria	k__norank_d__Bacteria	p__Bacteroidota	c__Kapabacteria	o__Kapabacteriales	f__norank_o__Kapabacteriales	g__norank_f__norank_o__Kapabacteriales	s__unclassified_g__norank_f__norank_o__Kapabacteriales	ASV1748	55	6.22262e-05	0	0	0	55	0	0	0	0	0	0	0	0	0	0	0	0
d__Bacteria	k__norank_d__Bacteria	p__Proteobacteria	c__Gammaproteobacteria	o__Gammaproteobacteria_Incertae_Sedis	f__unclassified_o__Gammaproteobacteria_Incertae_Sedis	g__Acidibacter	s__Steroidobacter_sp.	ASV3570	55	6.22262e-05	0	55	0	0	0	0	0	0	0	0	0	0	0	0	0	0
d__Bacteria	k__norank_d__Bacteria	p__Firmicutes	c__Clostridia	o__Oscillospirales	f__Ruminococcaceae	g__norank_f__Ruminococcaceae	s__uncultured_prokaryote_g__norank_f__Ruminococcaceae	ASV103	45	5.09123e-05	0	0	8	0	0	2	16	5	0	0	0	0	0	6	8	0
d__Bacteria	k__norank_d__Bacteria	p__Actinobacteriota	c__Actinobacteria	o__Bifidobacteriales	f__Bifidobacteriaceae	g__Bifidobacterium	s__unclassified_g__Bifidobacterium	ASV607	50	5.65693e-05	0	0	42	0	7	0	0	0	1	0	0	0	0	0	0	0
d__Bacteria	k__norank_d__Bacteria	p__Firmicutes	c__Clostridia	o__Clostridiales	f__Clostridiaceae	g__Clostridium_sensu_stricto_19	s__Clostridium_sp._g__Clostridium_sensu_stricto_19	ASV2168	49	5.54379e-05	49	0	0	0	0	0	0	0	0	0	0	0	0	0	0	0
d__Bacteria	k__norank_d__Bacteria	p__Spirochaetota	c__Spirochaetia	o__Spirochaetales	f__Spirochaetaceae	g__Spirochaeta	s__uncultured_bacterium_g__Spirochaeta	ASV2169	51	5.77007e-05	51	0	0	0	0	0	0	0	0	0	0	0	0	0	0	0
d__Bacteria	k__norank_d__Bacteria	p__Firmicutes	c__Clostridia	o__Oscillospirales	f__Eubacterium_coprostanoligenes_group	g__norank_f__Eubacterium_coprostanoligenes_group	s__unclassified_g__norank_f__Eubacterium_coprostanoligenes_group	ASV394	53	5.99634e-05	0	0	0	0	21	0	8	18	0	0	0	6	0	0	0	0
d__Bacteria	k__norank_d__Bacteria	p__Actinobacteriota	c__Acidimicrobiia	o__norank_c__Acidimicrobiia	f__norank_o__norank_c__Acidimicrobiia	g__norank_f__norank_o__norank_c__Acidimicrobiia	s__uncultured_forest_soil_bacterium_g__norank_f__norank_o__norank_c__Acidimicrobiia	ASV3573	52	5.8832e-05	0	52	0	0	0	0	0	0	0	0	0	0	0	0	0	0
d__Bacteria	k__norank_d__Bacteria	p__Actinobacteriota	c__Actinobacteria	o__Micrococcales	f__Microbacteriaceae	g__Curtobacterium	s__unclassified_g__Curtobacterium	ASV5253	50	5.65693e-05	0	0	0	0	0	0	0	0	0	0	0	0	0	0	50	0
d__Bacteria	k__norank_d__Bacteria	p__Actinobacteriota	c__Actinobacteria	o__Micrococcales	f__Micrococcaceae	g__Kocuria	s__unclassified_g__Kocuria	ASV1750	53	5.99634e-05	0	0	0	53	0	0	0	0	0	0	0	0	0	0	0	0
d__Bacteria	k__norank_d__Bacteria	p__Bacteroidota	c__Bacteroidia	o__Bacteroidales	f__Prevotellaceae	g__Prevotella	s__Prevotella_disiens	ASV3569	53	5.99634e-05	0	53	0	0	0	0	0	0	0	0	0	0	0	0	0	0
d__Bacteria	k__norank_d__Bacteria	p__Proteobacteria	c__Alphaproteobacteria	o__Rhizobiales	f__Xanthobacteraceae	g__norank_f__Xanthobacteraceae	s__uncultured_Pseudolabrys_sp._g__norank	ASV3571	51	5.77007e-05	0	51	0	0	0	0	0	0	0	0	0	0	0	0	0	0
d__Bacteria	k__norank_d__Bacteria	p__Proteobacteria	c__Gammaproteobacteria	o__Burkholderiales	f__Rhodocyclaceae	g__unclassified_f__Rhodocyclaceae	s__unclassified_f__Rhodocyclaceae	ASV2510	51	5.77007e-05	0	0	51	0	0	0	0	0	0	0	0	0	0	0	0	0
d__Bacteria	k__norank_d__Bacteria	p__Actinobacteriota	c__Actinobacteria	o__Propionibacteriales	f__Propionibacteriaceae	g__Tessaracoccus	s__unclassified_g__Tessaracoccus	ASV1749	54	6.10948e-05	0	0	0	54	0	0	0	0	0	0	0	0	0	0	0	0
d__Bacteria	k__norank_d__Bacteria	p__Desulfobacterota	c__Desulfobulbia	o__Desulfobulbales	f__Desulfocapsaceae	g__Desulfobacterium_catecholicum_group	s__unclassified_g__Desulfobacterium_catecholicum_group	ASV2508	50	5.65693e-05	0	0	50	0	0	0	0	0	0	0	0	0	0	0	0	0
d__Bacteria	k__norank_d__Bacteria	p__SAR324_cladeMarine_group_B	c__norank_p__SAR324_cladeMarine_group_B	o__norank_c__norank_p__SAR324_cladeMarine_group_B	f__norank_o__norank_c__norank_p__SAR324_cladeMarine_group_B	g__norank_f__norank_o__norank_c__norank_p__SAR324_cladeMarine_group_B	s__unclassified_g__norank_f__norank_o__norank_c__norank_p__SAR324_cladeMarine_group_B	ASV3572	48	5.43065e-05	0	48	0	0	0	0	0	0	0	0	0	0	0	0	0	0
d__Bacteria	k__norank_d__Bacteria	p__Proteobacteria	c__Alphaproteobacteria	o__Rhizobiales	f__Beijerinckiaceae	g__1174-901-12	s__unclassified_g__1174-901-12	ASV2639	51	5.77007e-05	0	21	30	0	0	0	0	0	0	0	0	0	0	0	0	0
d__Bacteria	k__norank_d__Bacteria	p__Actinobacteriota	c__Rubrobacteria	o__Rubrobacterales	f__Rubrobacteriaceae	g__Rubrobacter	s__unclassified_g__Rubrobacter	ASV1747	51	5.77007e-05	0	0	0	51	0	0	0	0	0	0	0	0	0	0	0	0
d__Bacteria	k__norank_d__Bacteria	p__Proteobacteria	c__Alphaproteobacteria	o__Kiloniellales	f__Fodinicurvataceae	g__norank_f__Fodinicurvataceae	s__uncultured_Rhodospirillaceae_bacterium_g__norank_f__Fodinicurvataceae	ASV4737	47	5.31751e-05	0	0	0	0	0	0	0	47	0	0	0	0	0	0	0	0
d__Bacteria	k__norank_d__Bacteria	p__Proteobacteria	c__Gammaproteobacteria	o__Burkholderiales	f__Burkholderiaceae	g__Burkholderia-Caballeronia-Paraburkholderia	s__unclassified_g__Burkholderia-Caballeronia-Paraburkholderia	ASV1746	46	5.20437e-05	0	0	0	46	0	0	0	0	0	0	0	0	0	0	0	0
d__Bacteria	k__norank_d__Bacteria	p__Proteobacteria	c__Gammaproteobacteria	o__Xanthomonadales	f__Xanthomonadaceae	g__unclassified_f__Xanthomonadaceae	s__unclassified_f__Xanthomonadaceae	ASV1843	48	5.43065e-05	0	0	0	33	0	0	0	3	0	0	4	8	0	0	0	0
d__Bacteria	k__norank_d__Bacteria	p__Actinobacteriota	c__Actinobacteria	o__Frankiales	f__Acidothermaceae	g__Acidothermus	s__uncultured_bacterium_g__Acidothermus	ASV3574	51	5.77007e-05	0	51	0	0	0	0	0	0	0	0	0	0	0	0	0	0
d__Bacteria	k__norank_d__Bacteria	p__Bacteroidota	c__Bacteroidia	o__Bacteroidales	f__unclassified_o__Bacteroidales	g__unclassified_o__Bacteroidales	s__unclassified_o__Bacteroidales	ASV2509	51	5.77007e-05	0	0	51	0	0	0	0	0	0	0	0	0	0	0	0	0
d__Bacteria	k__norank_d__Bacteria	p__Proteobacteria	c__Gammaproteobacteria	o__Burkholderiales	f__Rhodocyclaceae	g__unclassified_f__Rhodocyclaceae	s__unclassified_f__Rhodocyclaceae	ASV2515	48	5.43065e-05	0	0	48	0	0	0	0	0	0	0	0	0	0	0	0	0
d__Bacteria	k__norank_d__Bacteria	p__Proteobacteria	c__Gammaproteobacteria	o__Alteromonadales	f__Idiomarinaceae	g__Aliidiomarina	s__Aliidiomarina_taiwanensis	ASV2171	40	4.52554e-05	40	0	0	0	0	0	0	0	0	0	0	0	0	0	0	0
d__Bacteria	k__norank_d__Bacteria	p__Firmicutes	c__Bacilli	o__Staphylococcales	f__Staphylococcaceae	g__Staphylococcus	s__unclassified_g__Staphylococcus	ASV3765	46	5.20437e-05	0	31	0	0	0	0	0	15	0	0	0	0	0	0	0	0
d__Bacteria	k__norank_d__Bacteria	p__Firmicutes	c__Bacilli	o__Bacillales	f__Bacillaceae	g__Bacillus	s__unclassified_g__Bacillus	ASV3654	50	5.65693e-05	0	39	0	0	0	0	0	0	0	0	0	11	0	0	0	0
d__Bacteria	k__norank_d__Bacteria	p__Acidobacteriota	c__Acidobacteriae	o__Acidobacteriales	f__norank_o__Acidobacteriales	g__norank_f__norank_o__Acidobacteriales	s__unclassified_g__norank_f__norank_o__Acidobacteriales	ASV3575	46	5.20437e-05	0	46	0	0	0	0	0	0	0	0	0	0	0	0	0	0
d__Bacteria	k__norank_d__Bacteria	p__Firmicutes	c__Clostridia	o__Lachnospirales	f__Lachnospiraceae	g__unclassified_f__Lachnospiraceae	s__unclassified_f__Lachnospiraceae	ASV2172	45	5.09123e-05	45	0	0	0	0	0	0	0	0	0	0	0	0	0	0	0
d__Bacteria	k__norank_d__Bacteria	p__Actinobacteriota	c__Actinobacteria	o__Streptomycetales	f__Streptomycetaceae	g__Streptomyces	s__unclassified_g__Streptomyces	ASV2511	51	5.77007e-05	0	0	51	0	0	0	0	0	0	0	0	0	0	0	0	0
d__Bacteria	k__norank_d__Bacteria	p__Proteobacteria	c__Alphaproteobacteria	o__Elsterales	f__norank_o__Elsterales	g__norank_f__norank_o__Elsterales	s__unclassified_g__norank_f__norank_o__Elsterales	ASV3577	51	5.77007e-05	0	51	0	0	0	0	0	0	0	0	0	0	0	0	0	0
d__Bacteria	k__norank_d__Bacteria	p__Proteobacteria	c__Alphaproteobacteria	o__Rhizobiales	f__Rhizobiaceae	g__Phyllobacterium	s__unclassified_g__Phyllobacterium	ASV131	49	5.54379e-05	0	5	4	1	0	0	12	0	0	5	7	5	0	6	4	0
d__Bacteria	k__norank_d__Bacteria	p__Proteobacteria	c__Alphaproteobacteria	o__Rhizobiales	f__Devosiaceae	g__norank_f__Devosiaceae	s__unclassified_g__norank_f__Devosiaceae	ASV2514	48	5.43065e-05	0	0	48	0	0	0	0	0	0	0	0	0	0	0	0	0
d__Bacteria	k__norank_d__Bacteria	p__Bacteroidota	c__Bacteroidia	o__Bacteroidales	f__Prolixibacteraceae	g__WCHB1-32	s__unclassified_g__WCHB1-32	ASV2516	49	5.54379e-05	0	0	49	0	0	0	0	0	0	0	0	0	0	0	0	0
d__Bacteria	k__norank_d__Bacteria	p__Proteobacteria	c__Alphaproteobacteria	o__Caulobacterales	f__Caulobacteraceae	g__Brevundimonas	s__unclassified_g__Brevundimonas	ASV2513	50	5.65693e-05	0	0	50	0	0	0	0	0	0	0	0	0	0	0	0	0
d__Bacteria	k__norank_d__Bacteria	p__Firmicutes	c__Clostridia	o__Oscillospirales	f__Ruminococcaceae	g__Eubacterium_siraeum_group	s__gut_metagenome_g__Eubacterium_siraeum_group	ASV2926	50	5.65693e-05	0	0	0	0	0	0	50	0	0	0	0	0	0	0	0	0
d__Bacteria	k__norank_d__Bacteria	p__Proteobacteria	c__Gammaproteobacteria	o__Xanthomonadales	f__Xanthomonadaceae	g__Thermomonas	s__unclassified_g__Thermomonas	ASV1751	47	5.31751e-05	0	0	0	47	0	0	0	0	0	0	0	0	0	0	0	0
d__Bacteria	k__norank_d__Bacteria	p__Actinobacteriota	c__Actinobacteria	o__Propionibacteriales	f__Nocardioidaceae	g__unclassified_f__Nocardioidaceae	s__unclassified_f__Nocardioidaceae	ASV724	51	5.77007e-05	0	0	38	0	5	8	0	0	0	0	0	0	0	0	0	0
d__Bacteria	k__norank_d__Bacteria	p__Proteobacteria	c__Alphaproteobacteria	o__Caulobacterales	f__Caulobacteraceae	g__norank_f__Caulobacteraceae	s__bacterium_g__norank_f__Caulobacteraceae	ASV2545	52	5.8832e-05	0	6	46	0	0	0	0	0	0	0	0	0	0	0	0	0
d__Bacteria	k__norank_d__Bacteria	p__Proteobacteria	c__Gammaproteobacteria	o__Alteromonadales	f__Alteromonadaceae	g__Rheinheimera	s__unclassified_g__Rheinheimera	ASV2512	48	5.43065e-05	0	0	48	0	0	0	0	0	0	0	0	0	0	0	0	0
d__Bacteria	k__norank_d__Bacteria	p__Proteobacteria	c__Gammaproteobacteria	o__Burkholderiales	f__Rhodocyclaceae	g__unclassified_f__Rhodocyclaceae	s__unclassified_f__Rhodocyclaceae	ASV1752	52	5.8832e-05	0	0	0	52	0	0	0	0	0	0	0	0	0	0	0	0
d__Bacteria	k__norank_d__Bacteria	p__Actinobacteriota	c__Acidimicrobiia	o__IMCC26256	f__norank_o__IMCC26256	g__norank_f__norank_o__IMCC26256	s__unclassified_g__norank_f__norank_o__IMCC26256	ASV3576	49	5.54379e-05	0	49	0	0	0	0	0	0	0	0	0	0	0	0	0	0
d__Bacteria	k__norank_d__Bacteria	p__Acidobacteriota	c__Acidobacteriae	o__Acidobacteriales	f__norank_o__Acidobacteriales	g__norank_f__norank_o__Acidobacteriales	s__unclassified_g__norank_f__norank_o__Acidobacteriales	ASV3578	50	5.65693e-05	0	50	0	0	0	0	0	0	0	0	0	0	0	0	0	0
d__Bacteria	k__norank_d__Bacteria	p__Bdellovibrionota	c__Oligoflexia	o__0319-6G20	f__norank_o__0319-6G20	g__norank_f__norank_o__0319-6G20	s__uncultured_Roseobacter_sp._g__norank_f__norank	ASV2521	51	5.77007e-05	0	0	51	0	0	0	0	0	0	0	0	0	0	0	0	0
d__Bacteria	k__norank_d__Bacteria	p__Proteobacteria	c__Alphaproteobacteria	o__Rhizobiales	f__Rhizobiaceae	g__Shinella	s__unclassified_g__Shinella	ASV1755	49	5.54379e-05	0	0	0	49	0	0	0	0	0	0	0	0	0	0	0	0
d__Bacteria	k__norank_d__Bacteria	p__Actinobacteriota	c__Acidimicrobiia	o__norank_c__Acidimicrobiia	f__norank_o__norank_c__Acidimicrobiia	g__norank_f__norank_o__norank_c__Acidimicrobiia	s__uncultured_forest_soil_bacterium_g__norank_f__norank_o__norank_c__Acidimicrobiia	ASV3584	52	5.8832e-05	0	52	0	0	0	0	0	0	0	0	0	0	0	0	0	0
d__Bacteria	k__norank_d__Bacteria	p__Proteobacteria	c__Gammaproteobacteria	o__Pseudomonadales	f__Pseudomonadaceae	g__Pseudomonas	s__unclassified_g__Pseudomonas	ASV2518	44	4.9781e-05	0	0	44	0	0	0	0	0	0	0	0	0	0	0	0	0
d__Bacteria	k__norank_d__Bacteria	p__Firmicutes	c__Bacilli	o__Bacillales	f__Bacillaceae	g__Anoxybacillus	s__unclassified_g__Anoxybacillus	ASV2575	46	5.20437e-05	0	0	35	0	0	0	0	0	0	0	0	0	2	0	9	0
d__Bacteria	k__norank_d__Bacteria	p__Proteobacteria	c__Alphaproteobacteria	o__Rhizobiales	f__Rhizobiaceae	g__unclassified_f__Rhizobiaceae	s__unclassified_f__Rhizobiaceae	ASV2173	47	5.31751e-05	47	0	0	0	0	0	0	0	0	0	0	0	0	0	0	0
d__Bacteria	k__norank_d__Bacteria	p__Proteobacteria	c__Alphaproteobacteria	o__Rhizobiales	f__Hyphomicrobiaceae	g__Hyphomicrobium	s__uncultured_Alphaproteobacteria_bacterium_g__Hyphomicrobium	ASV1512	49	5.54379e-05	0	0	42	0	0	2	0	5	0	0	0	0	0	0	0	0
d__Bacteria	k__norank_d__Bacteria	p__Firmicutes	c__Clostridia	o__Lachnospirales	f__Lachnospiraceae	g__unclassified_f__Lachnospiraceae	s__unclassified_f__Lachnospiraceae	ASV2517	41	4.63868e-05	0	0	41	0	0	0	0	0	0	0	0	0	0	0	0	0
d__Bacteria	k__norank_d__Bacteria	p__Actinobacteriota	c__Actinobacteria	o__Frankiales	f__Acidothermaceae	g__Acidothermus	s__unclassified_g__Acidothermus	ASV3583	46	5.20437e-05	0	46	0	0	0	0	0	0	0	0	0	0	0	0	0	0
d__Bacteria	k__norank_d__Bacteria	p__Actinobacteriota	c__Actinobacteria	o__Micrococcales	f__Sanguibacteraceae	g__Sanguibacter	s__unclassified_g__Sanguibacter	ASV1754	51	5.77007e-05	0	0	0	51	0	0	0	0	0	0	0	0	0	0	0	0
d__Bacteria	k__norank_d__Bacteria	p__Acidobacteriota	c__Acidobacteriae	o__Acidobacteriales	f__Acidobacteriaceae_Subgroup_1	g__Occallatibacter	s__unclassified_g__Occallatibacter	ASV3580	50	5.65693e-05	0	50	0	0	0	0	0	0	0	0	0	0	0	0	0	0
d__Bacteria	k__norank_d__Bacteria	p__Acidobacteriota	c__Acidobacteriae	o__Acidobacteriales	f__norank_o__Acidobacteriales	g__norank_f__norank_o__Acidobacteriales	s__unclassified_g__norank_f__norank_o__Acidobacteriales	ASV3585	49	5.54379e-05	0	49	0	0	0	0	0	0	0	0	0	0	0	0	0	0
d__Bacteria	k__norank_d__Bacteria	p__Proteobacteria	c__Alphaproteobacteria	o__Rhizobiales	f__Beijerinckiaceae	g__Methylobacterium-Methylorubrum	s__unclassified_g__Methylobacterium-Methylorubrum	ASV436	53	5.99634e-05	0	0	0	36	17	0	0	0	0	0	0	0	0	0	0	0
d__Bacteria	k__norank_d__Bacteria	p__Firmicutes	c__Bacilli	o__Lactobacillales	f__Streptococcaceae	g__Streptococcus	s__unclassified_g__Streptococcus	ASV2927	46	5.20437e-05	0	0	0	0	0	0	46	0	0	0	0	0	0	0	0	0
d__Bacteria	k__norank_d__Bacteria	p__Proteobacteria	c__Alphaproteobacteria	o__Rhizobiales	f__Xanthobacteraceae	g__norank_f__Xanthobacteraceae	s__unclassified_g__norank_f__Xanthobacteraceae	ASV3581	48	5.43065e-05	0	48	0	0	0	0	0	0	0	0	0	0	0	0	0	0
d__Bacteria	k__norank_d__Bacteria	p__Actinobacteriota	c__Actinobacteria	o__Micrococcales	f__Intrasporangiaceae	g__Ornithinibacter	s__uncultured_bacterium_g__Ornithinibacter	ASV2522	48	5.43065e-05	0	0	48	0	0	0	0	0	0	0	0	0	0	0	0	0
d__Bacteria	k__norank_d__Bacteria	p__Proteobacteria	c__Gammaproteobacteria	o__Burkholderiales	f__Comamonadaceae	g__Acidovorax	s__unclassified_g__Acidovorax	ASV2571	46	5.20437e-05	0	0	40	0	0	0	0	0	0	0	0	0	0	0	6	0
d__Bacteria	k__norank_d__Bacteria	p__Firmicutes	c__Negativicutes	o__Veillonellales-Selenomonadales	f__Veillonellaceae	g__Dialister	s__Dialister_succinatiphilus	ASV746	45	5.09123e-05	0	0	0	0	4	1	37	3	0	0	0	0	0	0	0	0
d__Bacteria	k__norank_d__Bacteria	p__Firmicutes	c__Clostridia	o__Lachnospirales	f__Lachnospiraceae	g__unclassified_f__Lachnospiraceae	s__unclassified_f__Lachnospiraceae	ASV1458	49	5.54379e-05	0	0	47	0	0	2	0	0	0	0	0	0	0	0	0	0
d__Bacteria	k__norank_d__Bacteria	p__Acidobacteriota	c__Acidobacteriae	o__Acidobacteriales	f__norank_o__Acidobacteriales	g__norank_f__norank_o__Acidobacteriales	s__unclassified_g__norank_f__norank_o__Acidobacteriales	ASV3579	53	5.99634e-05	0	53	0	0	0	0	0	0	0	0	0	0	0	0	0	0
d__Bacteria	k__norank_d__Bacteria	p__Bacteroidota	c__Bacteroidia	o__Bacteroidales	f__Paludibacteraceae	g__Paludibacter	s__uncultured_bacterium_g__Paludibacter	ASV2520	42	4.75182e-05	0	0	42	0	0	0	0	0	0	0	0	0	0	0	0	0
d__Bacteria	k__norank_d__Bacteria	p__Firmicutes	c__Clostridia	o__Lachnospirales	f__Lachnospiraceae	g__unclassified_f__Lachnospiraceae	s__unclassified_f__Lachnospiraceae	ASV2519	45	5.09123e-05	0	0	45	0	0	0	0	0	0	0	0	0	0	0	0	0
d__Bacteria	k__norank_d__Bacteria	p__Firmicutes	c__Clostridia	o__Lachnospirales	f__Lachnospiraceae	g__Lachnospiraceae_NK4A136_group	s__uncultured_organism_g__Lachnospiraceae_NK4A136_group	ASV452	50	5.65693e-05	0	0	0	0	13	8	0	12	0	0	0	5	0	0	12	0
d__Bacteria	k__norank_d__Bacteria	p__Proteobacteria	c__Alphaproteobacteria	o__Kiloniellales	f__Fodinicurvataceae	g__norank_f__Fodinicurvataceae	s__uncultured_compost_bacterium_g__norank_f__Fodinicurvataceae	ASV4738	45	5.09123e-05	0	0	0	0	0	0	0	45	0	0	0	0	0	0	0	0
d__Bacteria	k__norank_d__Bacteria	p__Actinobacteriota	c__Acidimicrobiia	o__Microtrichales	f__Iamiaceae	g__Iamia	s__unclassified_g__Iamia	ASV1756	47	5.31751e-05	0	0	0	47	0	0	0	0	0	0	0	0	0	0	0	0
d__Bacteria	k__norank_d__Bacteria	p__Proteobacteria	c__Gammaproteobacteria	o__Pseudomonadales	f__Pseudomonadaceae	g__Pseudomonas	s__unclassified_g__Pseudomonas	ASV1758	52	5.8832e-05	0	0	0	52	0	0	0	0	0	0	0	0	0	0	0	0
d__Bacteria	k__norank_d__Bacteria	p__Actinobacteriota	c__Acidimicrobiia	o__norank_c__Acidimicrobiia	f__norank_o__norank_c__Acidimicrobiia	g__norank_f__norank_o__norank_c__Acidimicrobiia	s__uncultured_forest_soil_bacterium_g__norank_f__norank_o__norank_c__Acidimicrobiia	ASV3587	52	5.8832e-05	0	52	0	0	0	0	0	0	0	0	0	0	0	0	0	0
d__Bacteria	k__norank_d__Bacteria	p__Firmicutes	c__Bacilli	o__Lactobacillales	f__Lactobacillaceae	g__Lactobacillus	s__unclassified_g__Lactobacillus	ASV353	47	5.31751e-05	0	0	0	0	42	0	0	0	0	0	0	0	0	0	5	0
d__Bacteria	k__norank_d__Bacteria	p__Proteobacteria	c__Gammaproteobacteria	o__Burkholderiales	f__Rhodocyclaceae	g__unclassified_f__Rhodocyclaceae	s__unclassified_f__Rhodocyclaceae	ASV2175	47	5.31751e-05	47	0	0	0	0	0	0	0	0	0	0	0	0	0	0	0
d__Bacteria	k__norank_d__Bacteria	p__Firmicutes	c__Clostridia	o__Oscillospirales	f__Oscillospiraceae	g__UCG-002	s__unclassified_g__UCG-002	ASV358	50	5.65693e-05	0	0	0	0	39	0	0	0	0	11	0	0	0	0	0	0
d__Bacteria	k__norank_d__Bacteria	p__Proteobacteria	c__Alphaproteobacteria	o__Rhizobiales	f__Xanthobacteraceae	g__norank_f__Xanthobacteraceae	s__unclassified_g__norank_f__Xanthobacteraceae	ASV3586	50	5.65693e-05	0	50	0	0	0	0	0	0	0	0	0	0	0	0	0	0
d__Bacteria	k__norank_d__Bacteria	p__Proteobacteria	c__Gammaproteobacteria	o__Burkholderiales	f__Oxalobacteraceae	g__unclassified_f__Oxalobacteraceae	s__unclassified_f__Oxalobacteraceae	ASV2523	45	5.09123e-05	0	0	45	0	0	0	0	0	0	0	0	0	0	0	0	0
d__Bacteria	k__norank_d__Bacteria	p__Acidobacteriota	c__Acidobacteriae	o__Solibacterales	f__Solibacteraceae	g__Candidatus_Solibacter	s__unclassified_g__Candidatus_Solibacter	ASV3589	46	5.20437e-05	0	46	0	0	0	0	0	0	0	0	0	0	0	0	0	0
d__Bacteria	k__norank_d__Bacteria	p__Proteobacteria	c__Gammaproteobacteria	o__Burkholderiales	f__Rhodocyclaceae	g__Candidatus_Accumulibacter	s__unclassified_g__Candidatus_Accumulibacter	ASV2525	46	5.20437e-05	0	0	46	0	0	0	0	0	0	0	0	0	0	0	0	0
d__Bacteria	k__norank_d__Bacteria	p__Acidobacteriota	c__Acidobacteriae	o__Subgroup_2	f__norank_o__Subgroup_2	g__norank_f__norank_o__Subgroup_2	s__uncultured_forest_soil_bacterium_g__norank_f__norank_o__Subgroup_2	ASV3592	45	5.09123e-05	0	45	0	0	0	0	0	0	0	0	0	0	0	0	0	0
d__Bacteria	k__norank_d__Bacteria	p__Bdellovibrionota	c__Oligoflexia	o__0319-6G20	f__norank_o__0319-6G20	g__norank_f__norank_o__0319-6G20	s__unclassified_g__norank_f__norank_o__0319-6G20	ASV3588	49	5.54379e-05	0	49	0	0	0	0	0	0	0	0	0	0	0	0	0	0
d__Bacteria	k__norank_d__Bacteria	p__Proteobacteria	c__Gammaproteobacteria	o__Burkholderiales	f__Burkholderiaceae	g__Burkholderia-Caballeronia-Paraburkholderia	s__unclassified_g__Burkholderia-Caballeronia-Paraburkholderia	ASV3594	44	4.9781e-05	0	44	0	0	0	0	0	0	0	0	0	0	0	0	0	0
d__Bacteria	k__norank_d__Bacteria	p__Myxococcota	c__Myxococcia	o__Myxococcales	f__Myxococcaceae	g__P3OB-42	s__uncultured_bacterium_g__P3OB-42	ASV2559	44	4.9781e-05	0	0	39	0	0	0	0	5	0	0	0	0	0	0	0	0
d__Bacteria	k__norank_d__Bacteria	p__Actinobacteriota	c__Actinobacteria	o__Micromonosporales	f__Micromonosporaceae	g__Actinoplanes	s__unclassified_g__Actinoplanes	ASV2524	46	5.20437e-05	0	0	46	0	0	0	0	0	0	0	0	0	0	0	0	0
d__Bacteria	k__norank_d__Bacteria	p__Firmicutes	c__Bacilli	o__Bacillales	f__Bacillaceae	g__Geobacillus	s__unclassified_g__Geobacillus	ASV1760	47	5.31751e-05	0	0	0	47	0	0	0	0	0	0	0	0	0	0	0	0
d__Bacteria	k__norank_d__Bacteria	p__Firmicutes	c__Clostridia	o__Lachnospirales	f__Lachnospiraceae	g__Coprococcus	s__unclassified_g__Coprococcus	ASV425	47	5.31751e-05	0	0	0	0	16	4	22	0	0	0	0	5	0	0	0	0
d__Bacteria	k__norank_d__Bacteria	p__Firmicutes	c__Clostridia	o__Oscillospirales	f__Eubacterium_coprostanoligenes_group	g__norank_f__Eubacterium_coprostanoligenes_group	s__unclassified_g__norank_f__Eubacterium_coprostanoligenes_group	ASV1827	45	5.09123e-05	0	0	8	37	0	0	0	0	0	0	0	0	0	0	0	0
d__Bacteria	k__norank_d__Bacteria	p__Proteobacteria	c__Alphaproteobacteria	o__Acetobacterales	f__Acetobacteraceae	g__norank_f__Acetobacteraceae	s__unclassified_g__norank_f__Acetobacteraceae	ASV3593	45	5.09123e-05	0	45	0	0	0	0	0	0	0	0	0	0	0	0	0	0
d__Bacteria	k__norank_d__Bacteria	p__Actinobacteriota	c__Acidimicrobiia	o__IMCC26256	f__norank_o__IMCC26256	g__norank_f__norank_o__IMCC26256	s__unclassified_g__norank_f__norank_o__IMCC26256	ASV3591	47	5.31751e-05	0	47	0	0	0	0	0	0	0	0	0	0	0	0	0	0
d__Bacteria	k__norank_d__Bacteria	p__Acidobacteriota	c__Acidobacteriae	o__Acidobacteriales	f__norank_o__Acidobacteriales	g__norank_f__norank_o__Acidobacteriales	s__unclassified_g__norank_f__norank_o__Acidobacteriales	ASV3590	46	5.20437e-05	0	46	0	0	0	0	0	0	0	0	0	0	0	0	0	0
d__Bacteria	k__norank_d__Bacteria	p__Spirochaetota	c__Spirochaetia	o__Spirochaetales	f__Spirochaetaceae	g__Treponema	s__Treponema_zuelzerae	ASV1763	45	5.09123e-05	0	0	0	45	0	0	0	0	0	0	0	0	0	0	0	0
d__Bacteria	k__norank_d__Bacteria	p__Proteobacteria	c__Gammaproteobacteria	o__Burkholderiales	f__Rhodocyclaceae	g__Azoarcus	s__unclassified_g__Azoarcus	ASV2928	48	5.43065e-05	0	0	0	0	0	0	48	0	0	0	0	0	0	0	0	0
d__Bacteria	k__norank_d__Bacteria	p__Firmicutes	c__Clostridia	o__Lachnospirales	f__Lachnospiraceae	g__Lachnoclostridium	s__unclassified_g__Lachnoclostridium	ASV366	49	5.54379e-05	0	0	0	0	35	0	14	0	0	0	0	0	0	0	0	0
d__Bacteria	k__norank_d__Bacteria	p__Bacteroidota	c__Bacteroidia	o__Bacteroidales	f__Paludibacteraceae	g__Paludibacter	s__uncultured_bacterium_g__Paludibacter	ASV1762	46	5.20437e-05	0	0	0	46	0	0	0	0	0	0	0	0	0	0	0	0
d__Bacteria	k__norank_d__Bacteria	p__Proteobacteria	c__Gammaproteobacteria	o__Burkholderiales	f__Rhodocyclaceae	g__unclassified_f__Rhodocyclaceae	s__unclassified_f__Rhodocyclaceae	ASV2526	46	5.20437e-05	0	0	46	0	0	0	0	0	0	0	0	0	0	0	0	0
d__Bacteria	k__norank_d__Bacteria	p__Proteobacteria	c__Gammaproteobacteria	o__Pseudomonadales	f__Pseudomonadaceae	g__Pseudomonas	s__unclassified_g__Pseudomonas	ASV1761	49	5.54379e-05	0	0	0	49	0	0	0	0	0	0	0	0	0	0	0	0
d__Bacteria	k__norank_d__Bacteria	p__Proteobacteria	c__Gammaproteobacteria	o__Burkholderiales	f__Rhodocyclaceae	g__unclassified_f__Rhodocyclaceae	s__unclassified_f__Rhodocyclaceae	ASV2534	44	4.9781e-05	0	0	44	0	0	0	0	0	0	0	0	0	0	0	0	0
d__Bacteria	k__norank_d__Bacteria	p__Actinobacteriota	c__Thermoleophilia	o__Gaiellales	f__norank_o__Gaiellales	g__norank_f__norank_o__Gaiellales	s__unclassified_g__norank_f__norank_o__Gaiellales	ASV2531	44	4.9781e-05	0	0	44	0	0	0	0	0	0	0	0	0	0	0	0	0
d__Bacteria	k__norank_d__Bacteria	p__Proteobacteria	c__Gammaproteobacteria	o__Gammaproteobacteria_Incertae_Sedis	f__unclassified_o__Gammaproteobacteria_Incertae_Sedis	g__Acidibacter	s__unclassified_g__Acidibacter	ASV2528	48	5.43065e-05	0	0	48	0	0	0	0	0	0	0	0	0	0	0	0	0
d__Bacteria	k__norank_d__Bacteria	p__Bacteroidota	c__Bacteroidia	o__Bacteroidales	f__Bacteroidaceae	g__Bacteroides	s__unclassified_g__Bacteroides	ASV1052	45	5.09123e-05	0	0	0	0	0	21	0	8	0	0	4	0	0	0	12	0
d__Bacteria	k__norank_d__Bacteria	p__Proteobacteria	c__Gammaproteobacteria	o__Gammaproteobacteria_Incertae_Sedis	f__unclassified_o__Gammaproteobacteria_Incertae_Sedis	g__Acidibacter	s__unclassified_g__Acidibacter	ASV3597	45	5.09123e-05	0	45	0	0	0	0	0	0	0	0	0	0	0	0	0	0
d__Bacteria	k__norank_d__Bacteria	p__Proteobacteria	c__Gammaproteobacteria	o__Burkholderiales	f__Rhodocyclaceae	g__Dechloromonas	s__unclassified_g__Dechloromonas	ASV2533	48	5.43065e-05	0	0	48	0	0	0	0	0	0	0	0	0	0	0	0	0
d__Bacteria	k__norank_d__Bacteria	p__Bacteroidota	c__Bacteroidia	o__Sphingobacteriales	f__env.OPS_17	g__norank_f__env.OPS_17	s__uncultured_Sphingobacteriia_bacterium_g__norank_f__env.OPS_17	ASV1493	48	5.43065e-05	42	0	0	0	0	2	0	0	0	0	0	4	0	0	0	0
d__Bacteria	k__norank_d__Bacteria	p__Firmicutes	c__Clostridia	o__Lachnospirales	f__Lachnospiraceae	g__Ruminococcus_torques_group	s__unclassified_g__Ruminococcus_torques_group	ASV1766	44	4.9781e-05	0	0	0	44	0	0	0	0	0	0	0	0	0	0	0	0
d__Bacteria	k__norank_d__Bacteria	p__Proteobacteria	c__Alphaproteobacteria	o__Sphingomonadales	f__Sphingomonadaceae	g__unclassified_f__Sphingomonadaceae	s__unclassified_f__Sphingomonadaceae	ASV1765	48	5.43065e-05	0	0	0	48	0	0	0	0	0	0	0	0	0	0	0	0
d__Bacteria	k__norank_d__Bacteria	p__Proteobacteria	c__Alphaproteobacteria	o__Rhizobiales	f__Beijerinckiaceae	g__Microvirga	s__unclassified_g__Microvirga	ASV2532	41	4.63868e-05	0	0	41	0	0	0	0	0	0	0	0	0	0	0	0	0
d__Bacteria	k__norank_d__Bacteria	p__Proteobacteria	c__Alphaproteobacteria	o__Rhizobiales	f__Rhizobiales_Incertae_Sedis	g__norank_f__Rhizobiales_Incertae_Sedis	s__unclassified_g__norank_f__Rhizobiales_Incertae_Sedis	ASV2530	44	4.9781e-05	0	0	44	0	0	0	0	0	0	0	0	0	0	0	0	0
d__Bacteria	k__norank_d__Bacteria	p__Bacteroidota	c__Bacteroidia	o__Bacteroidales	f__Bacteroidaceae	g__Bacteroides	s__unclassified_g__Bacteroides	ASV3595	48	5.43065e-05	0	48	0	0	0	0	0	0	0	0	0	0	0	0	0	0
d__Bacteria	k__norank_d__Bacteria	p__Proteobacteria	c__Alphaproteobacteria	o__Caulobacterales	f__Caulobacteraceae	g__Phenylobacterium	s__unclassified_g__Phenylobacterium	ASV2527	49	5.54379e-05	0	0	49	0	0	0	0	0	0	0	0	0	0	0	0	0
d__Bacteria	k__norank_d__Bacteria	p__Proteobacteria	c__Alphaproteobacteria	o__Rhizobiales	f__Xanthobacteraceae	g__unclassified_f__Xanthobacteraceae	s__unclassified_f__Xanthobacteraceae	ASV3596	45	5.09123e-05	0	45	0	0	0	0	0	0	0	0	0	0	0	0	0	0
d__Bacteria	k__norank_d__Bacteria	p__Myxococcota	c__Polyangia	o__Polyangiales	f__Phaselicystidaceae	g__Phaselicystis	s__unclassified_g__Phaselicystis	ASV2529	48	5.43065e-05	0	0	48	0	0	0	0	0	0	0	0	0	0	0	0	0
d__Bacteria	k__norank_d__Bacteria	p__Firmicutes	c__Clostridia	o__Lachnospirales	f__Lachnospiraceae	g__unclassified_f__Lachnospiraceae	s__unclassified_f__Lachnospiraceae	ASV1386	46	5.20437e-05	0	0	42	0	0	4	0	0	0	0	0	0	0	0	0	0
d__Bacteria	k__norank_d__Bacteria	p__Proteobacteria	c__Alphaproteobacteria	o__Rhizobiales	f__unclassified_o__Rhizobiales	g__unclassified_o__Rhizobiales	s__unclassified_o__Rhizobiales	ASV3598	42	4.75182e-05	0	42	0	0	0	0	0	0	0	0	0	0	0	0	0	0
d__Bacteria	k__norank_d__Bacteria	p__Firmicutes	c__Clostridia	o__Peptostreptococcales-Tissierellales	f__Anaerovoracaceae	g__Eubacterium_brachy_group	s__uncultured_Firmicutes_bacterium_g__Eubacterium_brachy_group	ASV465	47	5.31751e-05	0	0	34	0	13	0	0	0	0	0	0	0	0	0	0	0
d__Bacteria	k__norank_d__Bacteria	p__Proteobacteria	c__Gammaproteobacteria	o__Cellvibrionales	f__Halieaceae	g__unclassified_f__Halieaceae	s__unclassified_f__Halieaceae	ASV2178	38	4.29927e-05	38	0	0	0	0	0	0	0	0	0	0	0	0	0	0	0
d__Bacteria	k__norank_d__Bacteria	p__Desulfobacterota	c__unclassified_p__Desulfobacterota	o__unclassified_p__Desulfobacterota	f__unclassified_p__Desulfobacterota	g__unclassified_p__Desulfobacterota	s__unclassified_p__Desulfobacterota	ASV1771	45	5.09123e-05	0	0	0	45	0	0	0	0	0	0	0	0	0	0	0	0
d__Bacteria	k__norank_d__Bacteria	p__Proteobacteria	c__Alphaproteobacteria	o__Acetobacterales	f__Acetobacteraceae	g__unclassified_f__Acetobacteraceae	s__unclassified_f__Acetobacteraceae	ASV3599	47	5.31751e-05	0	47	0	0	0	0	0	0	0	0	0	0	0	0	0	0
d__Bacteria	k__norank_d__Bacteria	p__Actinobacteriota	c__Actinobacteria	o__Propionibacteriales	f__Nocardioidaceae	g__Nocardioides	s__unclassified_g__Nocardioides	ASV2539	46	5.20437e-05	0	0	46	0	0	0	0	0	0	0	0	0	0	0	0	0
d__Bacteria	k__norank_d__Bacteria	p__Acidobacteriota	c__Acidobacteriae	o__Subgroup_2	f__norank_o__Subgroup_2	g__norank_f__norank_o__Subgroup_2	s__unclassified_g__norank_f__norank_o__Subgroup_2	ASV3601	45	5.09123e-05	0	45	0	0	0	0	0	0	0	0	0	0	0	0	0	0
d__Bacteria	k__norank_d__Bacteria	p__Actinobacteriota	c__Actinobacteria	o__Propionibacteriales	f__Propionibacteriaceae	g__Propionibacterium	s__Propionibacterium_westphaliense	ASV1770	46	5.20437e-05	0	0	0	46	0	0	0	0	0	0	0	0	0	0	0	0
d__Bacteria	k__norank_d__Bacteria	p__Proteobacteria	c__Alphaproteobacteria	o__Rhodobacterales	f__Rhodobacteraceae	g__Amaricoccus	s__unclassified_g__Amaricoccus	ASV694	44	4.9781e-05	0	0	0	0	5	6	25	8	0	0	0	0	0	0	0	0
d__Bacteria	k__norank_d__Bacteria	p__Firmicutes	c__Clostridia	o__Oscillospirales	f__Oscillospiraceae	g__UCG-002	s__unclassified_g__UCG-002	ASV58	45	5.09123e-05	0	0	0	0	0	0	32	0	0	0	0	0	0	11	2	0
d__Bacteria	k__norank_d__Bacteria	p__Proteobacteria	c__Alphaproteobacteria	o__Rhizobiales	f__Xanthobacteraceae	g__Bradyrhizobium	s__unclassified_g__Bradyrhizobium	ASV1067	43	4.86496e-05	0	27	0	0	0	16	0	0	0	0	0	0	0	0	0	0
d__Bacteria	k__norank_d__Bacteria	p__Firmicutes	c__Clostridia	o__Christensenellales	f__Christensenellaceae	g__Christensenellaceae_R-7_group	s__bacterium_enrichment_culture_clone_DPF35	ASV2581	44	4.9781e-05	0	0	39	0	0	0	0	0	0	0	0	5	0	0	0	0
d__Bacteria	k__norank_d__Bacteria	p__Actinobacteriota	c__Actinobacteria	o__Corynebacteriales	f__Nocardiaceae	g__Rhodococcus	s__unclassified_g__Rhodococcus	ASV2538	42	4.75182e-05	0	0	42	0	0	0	0	0	0	0	0	0	0	0	0	0
d__Bacteria	k__norank_d__Bacteria	p__Firmicutes	c__Bacilli	o__Bacillales	f__Bacillaceae	g__Pseudogracilibacillus	s__unclassified_g__Pseudogracilibacillus	ASV2537	44	4.9781e-05	0	0	44	0	0	0	0	0	0	0	0	0	0	0	0	0
d__Bacteria	k__norank_d__Bacteria	p__Firmicutes	c__Bacilli	o__Paenibacillales	f__Paenibacillaceae	g__norank_f__Paenibacillaceae	s__Bacillaceae_bacterium_mt6	ASV1769	45	5.09123e-05	0	0	0	45	0	0	0	0	0	0	0	0	0	0	0	0
d__Bacteria	k__norank_d__Bacteria	p__Desulfobacterota	c__Desulfuromonadia	o__Geobacterales	f__Geobacteraceae	g__Trichlorobacter	s__unclassified_g__Trichlorobacter	ASV2535	41	4.63868e-05	0	0	41	0	0	0	0	0	0	0	0	0	0	0	0	0
d__Bacteria	k__norank_d__Bacteria	p__Proteobacteria	c__Gammaproteobacteria	o__Competibacterales	f__Competibacteraceae	g__Candidatus_Competibacter	s__uncultured_proteobacterium_g__Candidatus_Competibacter	ASV2901	46	5.20437e-05	0	0	6	0	0	0	0	27	0	0	0	13	0	0	0	0
d__Bacteria	k__norank_d__Bacteria	p__Firmicutes	c__Clostridia	o__Lachnospirales	f__Lachnospiraceae	g__Lachnospiraceae_NK4A136_group	s__unclassified_g__Lachnospiraceae_NK4A136_group	ASV2536	47	5.31751e-05	0	0	47	0	0	0	0	0	0	0	0	0	0	0	0	0
d__Bacteria	k__norank_d__Bacteria	p__Actinobacteriota	c__Actinobacteria	o__Micrococcales	f__Promicromonosporaceae	g__Cellulosimicrobium	s__unclassified_g__Cellulosimicrobium	ASV2176	42	4.75182e-05	42	0	0	0	0	0	0	0	0	0	0	0	0	0	0	0
d__Bacteria	k__norank_d__Bacteria	p__Proteobacteria	c__Gammaproteobacteria	o__Burkholderiales	f__norank_o__Burkholderiales	g__norank_f__norank_o__Burkholderiales	s__uncultured_bacterium_g__norank_f__norank_o__Burkholderiales	ASV3600	45	5.09123e-05	0	45	0	0	0	0	0	0	0	0	0	0	0	0	0	0
d__Bacteria	k__norank_d__Bacteria	p__Proteobacteria	c__Gammaproteobacteria	o__Xanthomonadales	f__Xanthomonadaceae	g__unclassified_f__Xanthomonadaceae	s__unclassified_f__Xanthomonadaceae	ASV1775	46	5.20437e-05	0	0	0	46	0	0	0	0	0	0	0	0	0	0	0	0
d__Bacteria	k__norank_d__Bacteria	p__Proteobacteria	c__Gammaproteobacteria	o__Gammaproteobacteria_Incertae_Sedis	f__unclassified_o__Gammaproteobacteria_Incertae_Sedis	g__Acidibacter	s__uncultured_Steroidobacter_sp._g__Acidibacter	ASV3607	46	5.20437e-05	0	46	0	0	0	0	0	0	0	0	0	0	0	0	0	0
d__Bacteria	k__norank_d__Bacteria	p__Proteobacteria	c__Gammaproteobacteria	o__Oceanospirillales	f__Halomonadaceae	g__Halomonas	s__unclassified_g__Halomonas	ASV1774	40	4.52554e-05	0	0	0	40	0	0	0	0	0	0	0	0	0	0	0	0
d__Bacteria	k__norank_d__Bacteria	p__Proteobacteria	c__Gammaproteobacteria	o__Oceanospirillales	f__Hahellaceae	g__Hahella	s__unclassified_g__Hahella	ASV4739	45	5.09123e-05	0	0	0	0	0	0	0	45	0	0	0	0	0	0	0	0
d__Bacteria	k__norank_d__Bacteria	p__Proteobacteria	c__Alphaproteobacteria	o__Rhizobiales	f__Xanthobacteraceae	g__norank_f__Xanthobacteraceae	s__unclassified_g__norank_f__Xanthobacteraceae	ASV3606	44	4.9781e-05	0	44	0	0	0	0	0	0	0	0	0	0	0	0	0	0
d__Bacteria	k__norank_d__Bacteria	p__Proteobacteria	c__Gammaproteobacteria	o__Burkholderiales	f__Rhodocyclaceae	g__unclassified_f__Rhodocyclaceae	s__unclassified_f__Rhodocyclaceae	ASV2542	40	4.52554e-05	0	0	40	0	0	0	0	0	0	0	0	0	0	0	0	0
d__Bacteria	k__norank_d__Bacteria	p__Firmicutes	c__Bacilli	o__Bacillales	f__Bacillaceae	g__Bacillus	s__unclassified_g__Bacillus	ASV1772	45	5.09123e-05	0	0	0	45	0	0	0	0	0	0	0	0	0	0	0	0
d__Bacteria	k__norank_d__Bacteria	p__Proteobacteria	c__Alphaproteobacteria	o__Rhizobiales	f__Beijerinckiaceae	g__Methylobacterium-Methylorubrum	s__Methylobacterium_aerolatum	ASV399	41	4.63868e-05	0	2	0	0	19	0	0	20	0	0	0	0	0	0	0	0
d__Bacteria	k__norank_d__Bacteria	p__Firmicutes	c__Clostridia	o__Christensenellales	f__Christensenellaceae	g__Christensenellaceae_R-7_group	s__unclassified_g__Christensenellaceae_R-7_group	ASV1347	43	4.86496e-05	0	0	38	0	0	5	0	0	0	0	0	0	0	0	0	0
d__Bacteria	k__norank_d__Bacteria	p__Spirochaetota	c__Spirochaetia	o__Spirochaetales	f__Spirochaetaceae	g__Treponema	s__unclassified_g__Treponema	ASV1773	46	5.20437e-05	0	0	0	46	0	0	0	0	0	0	0	0	0	0	0	0
d__Bacteria	k__norank_d__Bacteria	p__Actinobacteriota	c__Actinobacteria	o__Frankiales	f__Acidothermaceae	g__Acidothermus	s__unclassified_g__Acidothermus	ASV1099	43	4.86496e-05	0	0	0	0	0	11	32	0	0	0	0	0	0	0	0	0
d__Bacteria	k__norank_d__Bacteria	p__Proteobacteria	c__Gammaproteobacteria	o__Burkholderiales	f__Comamonadaceae	g__Diaphorobacter	s__unclassified_g__Diaphorobacter	ASV2548	38	4.29927e-05	0	0	36	0	0	0	0	0	0	0	0	2	0	0	0	0
d__Bacteria	k__norank_d__Bacteria	p__Acidobacteriota	c__Acidobacteriae	o__Acidobacteriales	f__Koribacteraceae	g__Candidatus_Koribacter	s__unclassified_g__Candidatus_Koribacter	ASV3603	47	5.31751e-05	0	47	0	0	0	0	0	0	0	0	0	0	0	0	0	0
d__Bacteria	k__norank_d__Bacteria	p__Acidobacteriota	c__Acidobacteriae	o__Subgroup_13	f__norank_o__Subgroup_13	g__norank_f__norank_o__Subgroup_13	s__uncultured_Acidobacteria_bacterium_g__norank_f__norank_o__Subgroup_13	ASV3602	45	5.09123e-05	0	45	0	0	0	0	0	0	0	0	0	0	0	0	0	0
d__Bacteria	k__norank_d__Bacteria	p__Proteobacteria	c__Alphaproteobacteria	o__Defluviicoccales	f__Defluviicoccaceae	g__Defluviicoccus	s__unclassified_g__Defluviicoccus	ASV2179	39	4.4124e-05	39	0	0	0	0	0	0	0	0	0	0	0	0	0	0	0
d__Bacteria	k__norank_d__Bacteria	p__Bacteroidota	c__Bacteroidia	o__Bacteroidales	f__Dysgonomonadaceae	g__Proteiniphilum	s__unclassified_g__Proteiniphilum	ASV2541	43	4.86496e-05	0	0	43	0	0	0	0	0	0	0	0	0	0	0	0	0
d__Bacteria	k__norank_d__Bacteria	p__Actinobacteriota	c__Acidimicrobiia	o__norank_c__Acidimicrobiia	f__norank_o__norank_c__Acidimicrobiia	g__norank_f__norank_o__norank_c__Acidimicrobiia	s__unclassified_g__norank_f__norank_o__norank_c__Acidimicrobiia	ASV3605	45	5.09123e-05	0	45	0	0	0	0	0	0	0	0	0	0	0	0	0	0
d__Bacteria	k__norank_d__Bacteria	p__Firmicutes	c__Bacilli	o__Bacillales	f__Planococcaceae	g__unclassified_f__Planococcaceae	s__unclassified_f__Planococcaceae	ASV1776	48	5.43065e-05	0	0	0	48	0	0	0	0	0	0	0	0	0	0	0	0
d__Bacteria	k__norank_d__Bacteria	p__Chloroflexi	c__AD3	o__norank_c__AD3	f__norank_o__norank_c__AD3	g__norank_f__norank_o__norank_c__AD3	s__uncultured_bacterium_g__norank_f__norank_o__norank_c__AD3	ASV3604	45	5.09123e-05	0	45	0	0	0	0	0	0	0	0	0	0	0	0	0	0
d__Bacteria	k__norank_d__Bacteria	p__Actinobacteriota	c__Actinobacteria	o__Micrococcales	f__Dermacoccaceae	g__Kytococcus	s__Kytococcus_sedentarius	ASV1778	45	5.09123e-05	0	0	0	45	0	0	0	0	0	0	0	0	0	0	0	0
d__Bacteria	k__norank_d__Bacteria	p__Actinobacteriota	c__Thermoleophilia	o__Solirubrobacterales	f__Solirubrobacteraceae	g__Conexibacter	s__unclassified_g__Conexibacter	ASV3617	43	4.86496e-05	0	43	0	0	0	0	0	0	0	0	0	0	0	0	0	0
d__Bacteria	k__norank_d__Bacteria	p__Actinobacteriota	c__Acidimicrobiia	o__IMCC26256	f__norank_o__IMCC26256	g__norank_f__norank_o__IMCC26256	s__unclassified_g__norank_f__norank_o__IMCC26256	ASV3611	44	4.9781e-05	0	44	0	0	0	0	0	0	0	0	0	0	0	0	0	0
d__Bacteria	k__norank_d__Bacteria	p__Firmicutes	c__Clostridia	o__Oscillospirales	f__Ruminococcaceae	g__Subdoligranulum	s__unclassified_g__Subdoligranulum	ASV122	41	4.63868e-05	0	0	35	0	0	0	0	0	0	0	0	0	0	6	0	0
d__Bacteria	k__norank_d__Bacteria	p__Proteobacteria	c__Alphaproteobacteria	o__Rhizobiales	f__Beijerinckiaceae	g__Roseiarcus	s__uncultured_Alphaproteobacteria_bacterium_g__Roseiarcus	ASV3608	45	5.09123e-05	0	45	0	0	0	0	0	0	0	0	0	0	0	0	0	0
d__Bacteria	k__norank_d__Bacteria	p__Actinobacteriota	c__Actinobacteria	o__Micrococcales	f__Micrococcaceae	g__Rothia	s__unclassified_g__Rothia	ASV2180	42	4.75182e-05	42	0	0	0	0	0	0	0	0	0	0	0	0	0	0	0
d__Bacteria	k__norank_d__Bacteria	p__Actinobacteriota	c__Actinobacteria	o__Propionibacteriales	f__Propionibacteriaceae	g__Propioniciclava	s__unclassified_g__Propioniciclava	ASV2182	42	4.75182e-05	42	0	0	0	0	0	0	0	0	0	0	0	0	0	0	0
d__Bacteria	k__norank_d__Bacteria	p__Proteobacteria	c__Alphaproteobacteria	o__Rhizobiales	f__Beijerinckiaceae	g__Roseiarcus	s__uncultured_bacterium_g__Roseiarcus	ASV3609	44	4.9781e-05	0	44	0	0	0	0	0	0	0	0	0	0	0	0	0	0
d__Bacteria	k__norank_d__Bacteria	p__Proteobacteria	c__Gammaproteobacteria	o__Burkholderiales	f__Rhodocyclaceae	g__Denitratisoma	s__unclassified_g__Denitratisoma	ASV2543	43	4.86496e-05	0	0	43	0	0	0	0	0	0	0	0	0	0	0	0	0
d__Bacteria	k__norank_d__Bacteria	p__Proteobacteria	c__Alphaproteobacteria	o__Rhizobiales	f__Beijerinckiaceae	g__Methylocystis	s__unclassified_g__Methylocystis	ASV2546	45	5.09123e-05	0	0	45	0	0	0	0	0	0	0	0	0	0	0	0	0
d__Bacteria	k__norank_d__Bacteria	p__Actinobacteriota	c__Actinobacteria	o__Micrococcales	f__Micrococcaceae	g__Kocuria	s__unclassified_g__Kocuria	ASV3659	44	4.9781e-05	0	38	0	0	0	0	0	6	0	0	0	0	0	0	0	0
d__Bacteria	k__norank_d__Bacteria	p__Firmicutes	c__Bacilli	o__Erysipelotrichales	f__Erysipelotrichaceae	g__unclassified_f__Erysipelotrichaceae	s__unclassified_f__Erysipelotrichaceae	ASV2181	41	4.63868e-05	41	0	0	0	0	0	0	0	0	0	0	0	0	0	0	0
d__Bacteria	k__norank_d__Bacteria	p__Actinobacteriota	c__Thermoleophilia	o__Solirubrobacterales	f__Solirubrobacteraceae	g__norank_f__Solirubrobacteraceae	s__unclassified_g__norank_f__Solirubrobacteraceae	ASV3614	41	4.63868e-05	0	41	0	0	0	0	0	0	0	0	0	0	0	0	0	0
d__Bacteria	k__norank_d__Bacteria	p__Proteobacteria	c__Alphaproteobacteria	o__Rhizobiales	f__Xanthobacteraceae	g__norank_f__Xanthobacteraceae	s__uncultured_Pseudolabrys_sp._g__norank	ASV3612	44	4.9781e-05	0	44	0	0	0	0	0	0	0	0	0	0	0	0	0	0
d__Bacteria	k__norank_d__Bacteria	p__Proteobacteria	c__Alphaproteobacteria	o__Rhizobiales	f__Hyphomicrobiaceae	g__Pedomicrobium	s__unclassified_g__Pedomicrobium	ASV1779	43	4.86496e-05	0	0	0	43	0	0	0	0	0	0	0	0	0	0	0	0
d__Bacteria	k__norank_d__Bacteria	p__Actinobacteriota	c__Actinobacteria	o__Frankiales	f__Acidothermaceae	g__Acidothermus	s__unclassified_g__Acidothermus	ASV3613	45	5.09123e-05	0	45	0	0	0	0	0	0	0	0	0	0	0	0	0	0
d__Bacteria	k__norank_d__Bacteria	p__Proteobacteria	c__Alphaproteobacteria	o__Rhizobiales	f__Xanthobacteraceae	g__norank_f__Xanthobacteraceae	s__uncultured_forest_soil_bacterium_g__norank_f__Xanthobacteraceae	ASV3616	44	4.9781e-05	0	44	0	0	0	0	0	0	0	0	0	0	0	0	0	0
d__Bacteria	k__norank_d__Bacteria	p__Actinobacteriota	c__Actinobacteria	o__Frankiales	f__Geodermatophilaceae	g__Blastococcus	s__unclassified_g__Blastococcus	ASV3615	45	5.09123e-05	0	45	0	0	0	0	0	0	0	0	0	0	0	0	0	0
d__Bacteria	k__norank_d__Bacteria	p__Firmicutes	c__Clostridia	o__Clostridiales	f__Clostridiaceae	g__Clostridium_sensu_stricto_8	s__uncultured_bacterium_g__Clostridium_sensu_stricto_8	ASV2544	44	4.9781e-05	0	0	44	0	0	0	0	0	0	0	0	0	0	0	0	0
d__Bacteria	k__norank_d__Bacteria	p__Firmicutes	c__Clostridia	o__Oscillospirales	f__Ruminococcaceae	g__Faecalibacterium	s__unclassified_g__Faecalibacterium	ASV1777	45	5.09123e-05	0	0	0	45	0	0	0	0	0	0	0	0	0	0	0	0
d__Bacteria	k__norank_d__Bacteria	p__Desulfobacterota	c__Desulfovibrionia	o__Desulfovibrionales	f__Desulfovibrionaceae	g__Desulfovibrio	s__Desulfovibrio_desulfuricans	ASV1964	44	4.9781e-05	0	0	31	13	0	0	0	0	0	0	0	0	0	0	0	0
d__Bacteria	k__norank_d__Bacteria	p__Actinobacteriota	c__Thermoleophilia	o__Solirubrobacterales	f__Solirubrobacteraceae	g__norank_f__Solirubrobacteraceae	s__soil_metagenome_g__norank_f__Solirubrobacteraceae	ASV3610	40	4.52554e-05	0	40	0	0	0	0	0	0	0	0	0	0	0	0	0	0
d__Bacteria	k__norank_d__Bacteria	p__Gemmatimonadota	c__Gemmatimonadetes	o__Gemmatimonadales	f__Gemmatimonadaceae	g__norank_f__Gemmatimonadaceae	s__unclassified_g__norank_f__Gemmatimonadaceae	ASV2547	44	4.9781e-05	0	0	44	0	0	0	0	0	0	0	0	0	0	0	0	0
d__Bacteria	k__norank_d__Bacteria	p__Firmicutes	c__Clostridia	o__Lachnospirales	f__Lachnospiraceae	g__norank_f__Lachnospiraceae	s__uncultured_Gram-positive_bacterium_g__norank_f__Lachnospiraceae	ASV1782	42	4.75182e-05	0	0	0	42	0	0	0	0	0	0	0	0	0	0	0	0
d__Bacteria	k__norank_d__Bacteria	p__Proteobacteria	c__Gammaproteobacteria	o__Burkholderiales	f__Rhodocyclaceae	g__Zoogloea	s__unclassified_g__Zoogloea	ASV2556	41	4.63868e-05	0	0	41	0	0	0	0	0	0	0	0	0	0	0	0	0
d__Bacteria	k__norank_d__Bacteria	p__Proteobacteria	c__Alphaproteobacteria	o__Rhizobiales	f__Xanthobacteraceae	g__unclassified_f__Xanthobacteraceae	s__unclassified_f__Xanthobacteraceae	ASV2550	42	4.75182e-05	0	0	42	0	0	0	0	0	0	0	0	0	0	0	0	0
d__Bacteria	k__norank_d__Bacteria	p__Firmicutes	c__Clostridia	o__Lachnospirales	f__Lachnospiraceae	g__unclassified_f__Lachnospiraceae	s__unclassified_f__Lachnospiraceae	ASV2549	41	4.63868e-05	0	0	41	0	0	0	0	0	0	0	0	0	0	0	0	0
d__Bacteria	k__norank_d__Bacteria	p__Actinobacteriota	c__Actinobacteria	o__Corynebacteriales	f__Nocardiaceae	g__Rhodococcus	s__unclassified_g__Rhodococcus	ASV4740	44	4.9781e-05	0	0	0	0	0	0	0	44	0	0	0	0	0	0	0	0
d__Bacteria	k__norank_d__Bacteria	p__Proteobacteria	c__Alphaproteobacteria	o__Sphingomonadales	f__Sphingomonadaceae	g__Sphingomonas	s__unclassified_g__Sphingomonas	ASV2582	43	4.86496e-05	0	0	40	0	0	0	0	3	0	0	0	0	0	0	0	0
d__Bacteria	k__norank_d__Bacteria	p__Bacteroidota	c__Bacteroidia	o__Bacteroidales	f__Prolixibacteraceae	g__Roseimarinus	s__uncultured_bacterium_g__Roseimarinus	ASV2553	41	4.63868e-05	0	0	41	0	0	0	0	0	0	0	0	0	0	0	0	0
d__Bacteria	k__norank_d__Bacteria	p__Bacteroidota	c__Bacteroidia	o__Bacteroidales	f__Paludibacteraceae	g__Paludibacter	s__Paludibacter_propionicigenes_WB4	ASV2555	43	4.86496e-05	0	0	43	0	0	0	0	0	0	0	0	0	0	0	0	0
d__Bacteria	k__norank_d__Bacteria	p__Actinobacteriota	c__Actinobacteria	o__Micrococcales	f__Micrococcaceae	g__Micrococcus	s__unclassified_g__Micrococcus	ASV3222	39	4.4124e-05	0	34	0	0	0	0	5	0	0	0	0	0	0	0	0	0
d__Bacteria	k__norank_d__Bacteria	p__Proteobacteria	c__Gammaproteobacteria	o__unclassified_c__Gammaproteobacteria	f__unclassified_c__Gammaproteobacteria	g__unclassified_c__Gammaproteobacteria	s__unclassified_c__Gammaproteobacteria	ASV1780	44	4.9781e-05	0	0	0	44	0	0	0	0	0	0	0	0	0	0	0	0
d__Bacteria	k__norank_d__Bacteria	p__Firmicutes	c__Clostridia	o__Lachnospirales	f__Lachnospiraceae	g__unclassified_f__Lachnospiraceae	s__unclassified_f__Lachnospiraceae	ASV2183	39	4.4124e-05	39	0	0	0	0	0	0	0	0	0	0	0	0	0	0	0
d__Bacteria	k__norank_d__Bacteria	p__Chloroflexi	c__TK10	o__norank_c__TK10	f__norank_o__norank_c__TK10	g__norank_f__norank_o__norank_c__TK10	s__uncultured_bacterium_g__norank_f__norank_o__norank_c__TK10	ASV3618	45	5.09123e-05	0	45	0	0	0	0	0	0	0	0	0	0	0	0	0	0
d__Bacteria	k__norank_d__Bacteria	p__Proteobacteria	c__Alphaproteobacteria	o__Rhizobiales	f__Beijerinckiaceae	g__Methylobacterium-Methylorubrum	s__unclassified_g__Methylobacterium-Methylorubrum	ASV501	40	4.52554e-05	0	33	0	0	7	0	0	0	0	0	0	0	0	0	0	0
d__Bacteria	k__norank_d__Bacteria	p__Firmicutes	c__Clostridia	o__Oscillospirales	f__Ruminococcaceae	g__Faecalibacterium	s__unclassified_g__Faecalibacterium	ASV32	40	4.52554e-05	0	0	0	0	0	0	21	0	0	0	0	0	0	19	0	0
d__Bacteria	k__norank_d__Bacteria	p__Actinobacteriota	c__Thermoleophilia	o__Solirubrobacterales	f__Solirubrobacteraceae	g__Conexibacter	s__unclassified_g__Conexibacter	ASV3622	44	4.9781e-05	0	44	0	0	0	0	0	0	0	0	0	0	0	0	0	0
d__Bacteria	k__norank_d__Bacteria	p__Myxococcota	c__Polyangia	o__Polyangiales	f__Sandaracinaceae	g__norank_f__Sandaracinaceae	s__uncultured_compost_bacterium_g__norank_f__Sandaracinaceae	ASV243	39	4.4124e-05	0	0	0	0	0	0	0	37	0	0	0	0	0	2	0	0
d__Bacteria	k__norank_d__Bacteria	p__Acidobacteriota	c__Holophagae	o__Subgroup_7	f__norank_o__Subgroup_7	g__norank_f__norank_o__Subgroup_7	s__unclassified_g__norank_f__norank_o__Subgroup_7	ASV1784	42	4.75182e-05	0	0	0	42	0	0	0	0	0	0	0	0	0	0	0	0
d__Bacteria	k__norank_d__Bacteria	p__Proteobacteria	c__Gammaproteobacteria	o__Burkholderiales	f__Burkholderiaceae	g__Pandoraea	s__unclassified_g__Pandoraea	ASV50	41	4.63868e-05	0	0	0	0	0	0	0	0	0	0	4	9	0	12	16	0
d__Bacteria	k__norank_d__Bacteria	p__Proteobacteria	c__Alphaproteobacteria	o__Sphingomonadales	f__Sphingomonadaceae	g__Sphingomonas	s__unclassified_g__Sphingomonas	ASV1786	43	4.86496e-05	0	0	0	43	0	0	0	0	0	0	0	0	0	0	0	0
d__Bacteria	k__norank_d__Bacteria	p__Proteobacteria	c__Alphaproteobacteria	o__Acetobacterales	f__Acetobacteraceae	g__Acetobacter	s__unclassified_g__Acetobacter	ASV2554	43	4.86496e-05	0	0	43	0	0	0	0	0	0	0	0	0	0	0	0	0
d__Bacteria	k__norank_d__Bacteria	p__Proteobacteria	c__Gammaproteobacteria	o__Burkholderiales	f__Burkholderiaceae	g__Burkholderia-Caballeronia-Paraburkholderia	s__unclassified_g__Burkholderia-Caballeronia-Paraburkholderia	ASV3620	45	5.09123e-05	0	45	0	0	0	0	0	0	0	0	0	0	0	0	0	0
d__Bacteria	k__norank_d__Bacteria	p__Proteobacteria	c__Gammaproteobacteria	o__Enterobacterales	f__Erwiniaceae	g__Pantoea	s__unclassified_g__Pantoea	ASV1785	40	4.52554e-05	0	0	0	40	0	0	0	0	0	0	0	0	0	0	0	0
d__Bacteria	k__norank_d__Bacteria	p__Proteobacteria	c__Alphaproteobacteria	o__Acetobacterales	f__Acetobacteraceae	g__Acidicaldus	s__uncultured_Acetobacteraceae_bacterium_g__Acidicaldus	ASV3619	41	4.63868e-05	0	41	0	0	0	0	0	0	0	0	0	0	0	0	0	0
d__Bacteria	k__norank_d__Bacteria	p__Proteobacteria	c__Gammaproteobacteria	o__Burkholderiales	f__Comamonadaceae	g__unclassified_f__Comamonadaceae	s__unclassified_f__Comamonadaceae	ASV1783	45	5.09123e-05	0	0	0	45	0	0	0	0	0	0	0	0	0	0	0	0
d__Bacteria	k__norank_d__Bacteria	p__Firmicutes	c__Bacilli	o__unclassified_c__Bacilli	f__unclassified_c__Bacilli	g__unclassified_c__Bacilli	s__unclassified_c__Bacilli	ASV2551	40	4.52554e-05	0	0	40	0	0	0	0	0	0	0	0	0	0	0	0	0
d__Bacteria	k__norank_d__Bacteria	p__Proteobacteria	c__Alphaproteobacteria	o__Rhizobiales	f__Xanthobacteraceae	g__norank_f__Xanthobacteraceae	s__uncultured_Pseudolabrys_sp._g__norank	ASV3623	44	4.9781e-05	0	44	0	0	0	0	0	0	0	0	0	0	0	0	0	0
d__Bacteria	k__norank_d__Bacteria	p__Proteobacteria	c__Alphaproteobacteria	o__Sphingomonadales	f__Sphingomonadaceae	g__Sphingomonas	s__unclassified_g__Sphingomonas	ASV2252	43	4.86496e-05	0	37	0	0	0	0	0	0	0	0	6	0	0	0	0	0
d__Bacteria	k__norank_d__Bacteria	p__Proteobacteria	c__Gammaproteobacteria	o__Gammaproteobacteria_Incertae_Sedis	f__unclassified_o__Gammaproteobacteria_Incertae_Sedis	g__Acidibacter	s__unclassified_g__Acidibacter	ASV3621	47	5.31751e-05	0	47	0	0	0	0	0	0	0	0	0	0	0	0	0	0
d__Bacteria	k__norank_d__Bacteria	p__Bdellovibrionota	c__Bdellovibrionia	o__Bdellovibrionales	f__Bdellovibrionaceae	g__OM27_clade	s__uncultured_bacterium_g__OM27_clade	ASV2184	40	4.52554e-05	40	0	0	0	0	0	0	0	0	0	0	0	0	0	0	0
d__Bacteria	k__norank_d__Bacteria	p__Actinobacteriota	c__Actinobacteria	o__Pseudonocardiales	f__Pseudonocardiaceae	g__Saccharopolyspora	s__Saccharopolyspora_rectivirgula_g__Saccharopolyspora	ASV1787	40	4.52554e-05	0	0	0	40	0	0	0	0	0	0	0	0	0	0	0	0
d__Bacteria	k__norank_d__Bacteria	p__Proteobacteria	c__Gammaproteobacteria	o__Xanthomonadales	f__Rhodanobacteraceae	g__unclassified_f__Rhodanobacteraceae	s__unclassified_f__Rhodanobacteraceae	ASV1983	42	4.75182e-05	0	0	36	6	0	0	0	0	0	0	0	0	0	0	0	0
d__Bacteria	k__norank_d__Bacteria	p__Actinobacteriota	c__Actinobacteria	o__Micrococcales	f__Micrococcales_Incertae_Sedis	g__Timonella	s__unclassified_g__Timonella	ASV2560	40	4.52554e-05	0	0	40	0	0	0	0	0	0	0	0	0	0	0	0	0
d__Bacteria	k__norank_d__Bacteria	p__Firmicutes	c__Clostridia	o__Lachnospirales	f__Lachnospiraceae	g__Lachnospiraceae_NK4A136_group	s__Lachnospiraceae_bacterium_GAM79	ASV1160	42	4.75182e-05	0	0	0	0	0	9	0	17	0	0	0	0	0	0	16	0
d__Bacteria	k__norank_d__Bacteria	p__Proteobacteria	c__Gammaproteobacteria	o__Burkholderiales	f__Comamonadaceae	g__unclassified_f__Comamonadaceae	s__unclassified_f__Comamonadaceae	ASV2557	44	4.9781e-05	0	0	44	0	0	0	0	0	0	0	0	0	0	0	0	0
d__Bacteria	k__norank_d__Bacteria	p__Actinobacteriota	c__Actinobacteria	o__Corynebacteriales	f__Mycobacteriaceae	g__Mycobacterium	s__unclassified_g__Mycobacterium	ASV740	40	4.52554e-05	0	0	29	0	5	0	6	0	0	0	0	0	0	0	0	0
d__Bacteria	k__norank_d__Bacteria	p__Acidobacteriota	c__Acidobacteriae	o__Acidobacteriales	f__Acidobacteriaceae_Subgroup_1	g__Occallatibacter	s__unclassified_g__Occallatibacter	ASV3624	39	4.4124e-05	0	39	0	0	0	0	0	0	0	0	0	0	0	0	0	0
d__Bacteria	k__norank_d__Bacteria	p__Firmicutes	c__Bacilli	o__Bacillales	f__Bacillaceae	g__Bacillus	s__unclassified_g__Bacillus	ASV428	38	4.29927e-05	0	0	0	0	15	8	15	0	0	0	0	0	0	0	0	0
d__Bacteria	k__norank_d__Bacteria	p__Firmicutes	c__Clostridia	o__Lachnospirales	f__Lachnospiraceae	g__Fusicatenibacter	s__unclassified_g__Fusicatenibacter	ASV2969	38	4.29927e-05	0	0	0	0	0	0	21	17	0	0	0	0	0	0	0	0
d__Bacteria	k__norank_d__Bacteria	p__Bacteroidota	c__Bacteroidia	o__Bacteroidales	f__Prevotellaceae	g__unclassified_f__Prevotellaceae	s__unclassified_f__Prevotellaceae	ASV2561	38	4.29927e-05	0	0	38	0	0	0	0	0	0	0	0	0	0	0	0	0
d__Bacteria	k__norank_d__Bacteria	p__Proteobacteria	c__Alphaproteobacteria	o__Rhizobiales	f__Beijerinckiaceae	g__Methylobacterium-Methylorubrum	s__unclassified_g__Methylobacterium-Methylorubrum	ASV287	42	4.75182e-05	0	25	0	0	15	0	0	0	0	0	0	0	0	2	0	0
d__Bacteria	k__norank_d__Bacteria	p__Proteobacteria	c__Gammaproteobacteria	o__JG36-TzT-191	f__norank_o__JG36-TzT-191	g__norank_f__norank_o__JG36-TzT-191	s__unclassified_g__norank_f__norank_o__JG36-TzT-191	ASV3626	44	4.9781e-05	0	44	0	0	0	0	0	0	0	0	0	0	0	0	0	0
d__Bacteria	k__norank_d__Bacteria	p__Proteobacteria	c__Alphaproteobacteria	o__Rhodobacterales	f__Rhodobacteraceae	g__Rubellimicrobium	s__unclassified_g__Rubellimicrobium	ASV2185	38	4.29927e-05	38	0	0	0	0	0	0	0	0	0	0	0	0	0	0	0
d__Bacteria	k__norank_d__Bacteria	p__Acidobacteriota	c__Acidobacteriae	o__Subgroup_2	f__norank_o__Subgroup_2	g__norank_f__norank_o__Subgroup_2	s__unclassified_g__norank_f__norank_o__Subgroup_2	ASV3625	42	4.75182e-05	0	42	0	0	0	0	0	0	0	0	0	0	0	0	0	0
d__Bacteria	k__norank_d__Bacteria	p__Actinobacteriota	c__Thermoleophilia	o__Solirubrobacterales	f__Solirubrobacteraceae	g__Conexibacter	s__unclassified_g__Conexibacter	ASV3627	42	4.75182e-05	0	42	0	0	0	0	0	0	0	0	0	0	0	0	0	0
d__Bacteria	k__norank_d__Bacteria	p__Proteobacteria	c__Alphaproteobacteria	o__Sphingomonadales	f__Sphingomonadaceae	g__Sphingomonas	s__unclassified_g__Sphingomonas	ASV1789	44	4.9781e-05	0	0	0	44	0	0	0	0	0	0	0	0	0	0	0	0
d__Bacteria	k__norank_d__Bacteria	p__Proteobacteria	c__Alphaproteobacteria	o__Acetobacterales	f__Acetobacteraceae	g__unclassified_f__Acetobacteraceae	s__unclassified_f__Acetobacteraceae	ASV1788	40	4.52554e-05	0	0	0	40	0	0	0	0	0	0	0	0	0	0	0	0
d__Bacteria	k__norank_d__Bacteria	p__Myxococcota	c__Polyangia	o__Polyangiales	f__Polyangiaceae	g__Pajaroellobacter	s__unclassified_g__Pajaroellobacter	ASV2558	40	4.52554e-05	0	0	40	0	0	0	0	0	0	0	0	0	0	0	0	0
d__Bacteria	k__norank_d__Bacteria	p__Bacteroidota	c__Bacteroidia	o__Bacteroidales	f__Paludibacteraceae	g__Paludibacter	s__unclassified_g__Paludibacter	ASV2930	43	4.86496e-05	0	0	0	0	0	0	43	0	0	0	0	0	0	0	0	0
d__Bacteria	k__norank_d__Bacteria	p__Actinobacteriota	c__Actinobacteria	o__Catenulisporales	f__Actinospicaceae	g__Actinospica	s__unclassified_g__Actinospica	ASV3635	39	4.4124e-05	0	39	0	0	0	0	0	0	0	0	0	0	0	0	0	0
d__Bacteria	k__norank_d__Bacteria	p__Firmicutes	c__Clostridia	o__Peptostreptococcales-Tissierellales	f__norank_o__Peptostreptococcales-Tissierellales	g__Anaerococcus	s__uncultured_bacterium_g__Anaerococcus	ASV1792	41	4.63868e-05	0	0	0	41	0	0	0	0	0	0	0	0	0	0	0	0
d__Bacteria	k__norank_d__Bacteria	p__Desulfobacterota	c__unclassified_p__Desulfobacterota	o__unclassified_p__Desulfobacterota	f__unclassified_p__Desulfobacterota	g__unclassified_p__Desulfobacterota	s__unclassified_p__Desulfobacterota	ASV1794	38	4.29927e-05	0	0	0	38	0	0	0	0	0	0	0	0	0	0	0	0
d__Bacteria	k__norank_d__Bacteria	p__Bacteroidota	c__Bacteroidia	o__Flavobacteriales	f__NS9_marine_group	g__norank_f__NS9_marine_group	s__unclassified_g__norank_f__NS9_marine_group	ASV2186	40	4.52554e-05	40	0	0	0	0	0	0	0	0	0	0	0	0	0	0	0
d__Bacteria	k__norank_d__Bacteria	p__Actinobacteriota	c__Actinobacteria	o__Micrococcales	f__Intrasporangiaceae	g__Janibacter	s__unclassified_g__Janibacter	ASV1030	41	4.63868e-05	0	0	0	0	0	41	0	0	0	0	0	0	0	0	0	0
d__Bacteria	k__norank_d__Bacteria	p__Deinococcota	c__Deinococci	o__Deinococcales	f__Trueperaceae	g__Truepera	s__uncultured_bacterium_g__Truepera	ASV4742	40	4.52554e-05	0	0	0	0	0	0	0	40	0	0	0	0	0	0	0	0
d__Bacteria	k__norank_d__Bacteria	p__Actinobacteriota	c__Actinobacteria	o__Corynebacteriales	f__Mycobacteriaceae	g__Mycobacterium	s__unclassified_g__Mycobacterium	ASV3628	41	4.63868e-05	0	41	0	0	0	0	0	0	0	0	0	0	0	0	0	0
d__Bacteria	k__norank_d__Bacteria	p__Proteobacteria	c__Gammaproteobacteria	o__Burkholderiales	f__Rhodocyclaceae	g__Thauera	s__unclassified_g__Thauera	ASV2562	39	4.4124e-05	0	0	39	0	0	0	0	0	0	0	0	0	0	0	0	0
d__Bacteria	k__norank_d__Bacteria	p__Acidobacteriota	c__Acidobacteriae	o__Bryobacterales	f__Bryobacteraceae	g__Bryobacter	s__unclassified_g__Bryobacter	ASV3630	42	4.75182e-05	0	42	0	0	0	0	0	0	0	0	0	0	0	0	0	0
d__Bacteria	k__norank_d__Bacteria	p__Actinobacteriota	c__Thermoleophilia	o__Gaiellales	f__norank_o__Gaiellales	g__norank_f__norank_o__Gaiellales	s__uncultured_bacterium_5G12	ASV3633	42	4.75182e-05	0	42	0	0	0	0	0	0	0	0	0	0	0	0	0	0
d__Bacteria	k__norank_d__Bacteria	p__Chloroflexi	c__Ktedonobacteria	o__Ktedonobacterales	f__JG30-KF-AS9	g__norank_f__JG30-KF-AS9	s__uncultured_Ktedonobacterales_bacterium_g__norank_f__JG30-KF-AS9	ASV3631	39	4.4124e-05	0	39	0	0	0	0	0	0	0	0	0	0	0	0	0	0
d__Bacteria	k__norank_d__Bacteria	p__Firmicutes	c__Clostridia	o__Lachnospirales	f__Lachnospiraceae	g__Ruminococcus_gauvreauii_group	s__unclassified_g__Ruminococcus_gauvreauii_group	ASV786	39	4.4124e-05	0	0	36	0	3	0	0	0	0	0	0	0	0	0	0	0
d__Bacteria	k__norank_d__Bacteria	p__Proteobacteria	c__Alphaproteobacteria	o__Rhizobiales	f__Xanthobacteraceae	g__unclassified_f__Xanthobacteraceae	s__unclassified_f__Xanthobacteraceae	ASV2565	42	4.75182e-05	0	0	42	0	0	0	0	0	0	0	0	0	0	0	0	0
d__Bacteria	k__norank_d__Bacteria	p__Proteobacteria	c__Alphaproteobacteria	o__Micropepsales	f__Micropepsaceae	g__norank_f__Micropepsaceae	s__unclassified_g__norank_f__Micropepsaceae	ASV3634	41	4.63868e-05	0	41	0	0	0	0	0	0	0	0	0	0	0	0	0	0
d__Bacteria	k__norank_d__Bacteria	p__Verrucomicrobiota	c__Chlamydiae	o__Chlamydiales	f__unclassified_o__Chlamydiales	g__unclassified_o__Chlamydiales	s__unclassified_o__Chlamydiales	ASV1942	42	4.75182e-05	20	0	0	22	0	0	0	0	0	0	0	0	0	0	0	0
d__Bacteria	k__norank_d__Bacteria	p__Proteobacteria	c__Gammaproteobacteria	o__Enterobacterales	f__Enterobacteriaceae	g__unclassified_f__Enterobacteriaceae	s__unclassified_f__Enterobacteriaceae	ASV2564	45	5.09123e-05	0	0	45	0	0	0	0	0	0	0	0	0	0	0	0	0
d__Bacteria	k__norank_d__Bacteria	p__Proteobacteria	c__Alphaproteobacteria	o__Rhizobiales	f__Xanthobacteraceae	g__Afipia	s__unclassified_g__Afipia	ASV3629	38	4.29927e-05	0	38	0	0	0	0	0	0	0	0	0	0	0	0	0	0
d__Bacteria	k__norank_d__Bacteria	p__Actinobacteriota	c__Actinobacteria	o__Pseudonocardiales	f__Pseudonocardiaceae	g__Actinomycetospora	s__unclassified_g__Actinomycetospora	ASV4741	41	4.63868e-05	0	0	0	0	0	0	0	41	0	0	0	0	0	0	0	0
d__Bacteria	k__norank_d__Bacteria	p__Firmicutes	c__Bacilli	o__Bacillales	f__Bacillaceae	g__Bacillus	s__unclassified_g__Bacillus	ASV2566	42	4.75182e-05	0	0	42	0	0	0	0	0	0	0	0	0	0	0	0	0
d__Bacteria	k__norank_d__Bacteria	p__Acidobacteriota	c__Acidobacteriae	o__Acidobacteriales	f__norank_o__Acidobacteriales	g__norank_f__norank_o__Acidobacteriales	s__unclassified_g__norank_f__norank_o__Acidobacteriales	ASV3632	43	4.86496e-05	0	43	0	0	0	0	0	0	0	0	0	0	0	0	0	0
d__Bacteria	k__norank_d__Bacteria	p__Firmicutes	c__Clostridia	o__Lachnospirales	f__Lachnospiraceae	g__Eubacterium_eligens_group	s__unclassified_g__Eubacterium_eligens_group	ASV2563	41	4.63868e-05	0	0	41	0	0	0	0	0	0	0	0	0	0	0	0	0
d__Bacteria	k__norank_d__Bacteria	p__Proteobacteria	c__Alphaproteobacteria	o__Rhizobiales	f__Rhizobiales_Incertae_Sedis	g__norank_f__Rhizobiales_Incertae_Sedis	s__unclassified_g__norank_f__Rhizobiales_Incertae_Sedis	ASV1791	41	4.63868e-05	0	0	0	41	0	0	0	0	0	0	0	0	0	0	0	0
d__Bacteria	k__norank_d__Bacteria	p__Actinobacteriota	c__Actinobacteria	o__Pseudonocardiales	f__Pseudonocardiaceae	g__Prauserella	s__unclassified_g__Prauserella	ASV1799	42	4.75182e-05	0	0	0	42	0	0	0	0	0	0	0	0	0	0	0	0
d__Bacteria	k__norank_d__Bacteria	p__Actinobacteriota	c__Actinobacteria	o__Frankiales	f__Acidothermaceae	g__Acidothermus	s__unclassified_g__Acidothermus	ASV3639	39	4.4124e-05	0	39	0	0	0	0	0	0	0	0	0	0	0	0	0	0
d__Bacteria	k__norank_d__Bacteria	p__Bacteroidota	c__Bacteroidia	o__Bacteroidales	f__Prolixibacteraceae	g__WCHB1-32	s__unclassified_g__WCHB1-32	ASV1802	43	4.86496e-05	0	0	0	43	0	0	0	0	0	0	0	0	0	0	0	0
d__Bacteria	k__norank_d__Bacteria	p__Bacteroidota	c__Bacteroidia	o__Flavobacteriales	f__Weeksellaceae	g__Chryseobacterium	s__unclassified_g__Chryseobacterium	ASV1804	43	4.86496e-05	0	0	0	43	0	0	0	0	0	0	0	0	0	0	0	0
d__Bacteria	k__norank_d__Bacteria	p__Acidobacteriota	c__Acidobacteriae	o__Subgroup_2	f__norank_o__Subgroup_2	g__norank_f__norank_o__Subgroup_2	s__uncultured_Holophaga_sp._g__norank_f__norank_o__Subgroup_2	ASV3647	42	4.75182e-05	0	42	0	0	0	0	0	0	0	0	0	0	0	0	0	0
d__Bacteria	k__norank_d__Bacteria	p__Proteobacteria	c__Gammaproteobacteria	o__Oceanospirillales	f__Halomonadaceae	g__Halomonas	s__unclassified_g__Halomonas	ASV1803	39	4.4124e-05	0	0	0	39	0	0	0	0	0	0	0	0	0	0	0	0
d__Bacteria	k__norank_d__Bacteria	p__Proteobacteria	c__Alphaproteobacteria	o__Micropepsales	f__Micropepsaceae	g__norank_f__Micropepsaceae	s__unclassified_g__norank_f__Micropepsaceae	ASV3644	39	4.4124e-05	0	39	0	0	0	0	0	0	0	0	0	0	0	0	0	0
d__Bacteria	k__norank_d__Bacteria	p__Chloroflexi	c__Ktedonobacteria	o__Ktedonobacterales	f__Ktedonobacteraceae	g__unclassified_f__Ktedonobacteraceae	s__unclassified_f__Ktedonobacteraceae	ASV3638	40	4.52554e-05	0	40	0	0	0	0	0	0	0	0	0	0	0	0	0	0
d__Bacteria	k__norank_d__Bacteria	p__Proteobacteria	c__Gammaproteobacteria	o__Burkholderiales	f__Burkholderiaceae	g__Burkholderia-Caballeronia-Paraburkholderia	s__unclassified_g__Burkholderia-Caballeronia-Paraburkholderia	ASV3643	42	4.75182e-05	0	42	0	0	0	0	0	0	0	0	0	0	0	0	0	0
d__Bacteria	k__norank_d__Bacteria	p__Actinobacteriota	c__Actinobacteria	o__Micrococcales	f__Microbacteriaceae	g__unclassified_f__Microbacteriaceae	s__unclassified_f__Microbacteriaceae	ASV1801	41	4.63868e-05	0	0	0	41	0	0	0	0	0	0	0	0	0	0	0	0
d__Bacteria	k__norank_d__Bacteria	p__Proteobacteria	c__Alphaproteobacteria	o__Rhodobacterales	f__Rhodobacteraceae	g__Rubellimicrobium	s__uncultured_bacterium_g__Rubellimicrobium	ASV1797	38	4.29927e-05	0	0	0	38	0	0	0	0	0	0	0	0	0	0	0	0
d__Bacteria	k__norank_d__Bacteria	p__Actinobacteriota	c__Actinobacteria	o__Bifidobacteriales	f__Bifidobacteriaceae	g__Bifidobacterium	s__unclassified_g__Bifidobacterium	ASV3773	36	4.07299e-05	0	26	0	0	0	0	0	0	0	0	0	0	0	0	10	0
d__Bacteria	k__norank_d__Bacteria	p__Proteobacteria	c__Gammaproteobacteria	o__Burkholderiales	f__Comamonadaceae	g__Aquabacterium	s__unclassified_g__Aquabacterium	ASV1798	40	4.52554e-05	0	0	0	40	0	0	0	0	0	0	0	0	0	0	0	0
d__Bacteria	k__norank_d__Bacteria	p__Desulfobacterota	c__Desulfobulbia	o__Desulfobulbales	f__Desulfobulbaceae	g__Desulfobulbus	s__uncultured_soil_bacterium_g__Desulfobulbus	ASV1805	42	4.75182e-05	0	0	0	42	0	0	0	0	0	0	0	0	0	0	0	0
d__Bacteria	k__norank_d__Bacteria	p__Acidobacteriota	c__Acidobacteriae	o__Bryobacterales	f__Bryobacteraceae	g__Bryobacter	s__unclassified_g__Bryobacter	ASV3641	41	4.63868e-05	0	41	0	0	0	0	0	0	0	0	0	0	0	0	0	0
d__Bacteria	k__norank_d__Bacteria	p__Actinobacteriota	c__Thermoleophilia	o__Solirubrobacterales	f__67-14	g__norank_f__67-14	s__unclassified_g__norank_f__67-14	ASV3637	43	4.86496e-05	0	43	0	0	0	0	0	0	0	0	0	0	0	0	0	0
d__Bacteria	k__norank_d__Bacteria	p__Bacteroidota	c__Bacteroidia	o__Bacteroidales	f__Rikenellaceae	g__Alistipes	s__unclassified_g__Alistipes	ASV1109	37	4.18613e-05	0	0	0	0	0	10	27	0	0	0	0	0	0	0	0	0
d__Bacteria	k__norank_d__Bacteria	p__Acidobacteriota	c__Acidobacteriae	o__Solibacterales	f__Solibacteraceae	g__Candidatus_Solibacter	s__unclassified_g__Candidatus_Solibacter	ASV3645	42	4.75182e-05	0	42	0	0	0	0	0	0	0	0	0	0	0	0	0	0
d__Bacteria	k__norank_d__Bacteria	p__Firmicutes	c__Clostridia	o__Peptostreptococcales-Tissierellales	f__norank_o__Peptostreptococcales-Tissierellales	g__Finegoldia	s__unclassified_g__Finegoldia	ASV3815	41	4.63868e-05	0	27	0	0	0	0	0	14	0	0	0	0	0	0	0	0
d__Bacteria	k__norank_d__Bacteria	p__Actinobacteriota	c__Actinobacteria	o__Frankiales	f__Acidothermaceae	g__Acidothermus	s__unclassified_g__Acidothermus	ASV3640	42	4.75182e-05	0	42	0	0	0	0	0	0	0	0	0	0	0	0	0	0
d__Bacteria	k__norank_d__Bacteria	p__Firmicutes	c__Bacilli	o__Staphylococcales	f__Staphylococcaceae	g__Staphylococcus	s__unclassified_g__Staphylococcus	ASV1806	43	4.86496e-05	0	0	0	43	0	0	0	0	0	0	0	0	0	0	0	0
d__Bacteria	k__norank_d__Bacteria	p__Actinobacteriota	c__Actinobacteria	o__Corynebacteriales	f__Corynebacteriaceae	g__Corynebacterium	s__unclassified_g__Corynebacterium	ASV2187	39	4.4124e-05	39	0	0	0	0	0	0	0	0	0	0	0	0	0	0	0
d__Bacteria	k__norank_d__Bacteria	p__Proteobacteria	c__Alphaproteobacteria	o__Rhodospirillales	f__Magnetospirillaceae	g__Telmatospirillum	s__unclassified_g__Telmatospirillum	ASV2569	41	4.63868e-05	0	0	41	0	0	0	0	0	0	0	0	0	0	0	0	0
d__Bacteria	k__norank_d__Bacteria	p__Proteobacteria	c__Gammaproteobacteria	o__Burkholderiales	f__Rhodocyclaceae	g__unclassified_f__Rhodocyclaceae	s__unclassified_f__Rhodocyclaceae	ASV1807	39	4.4124e-05	0	0	0	39	0	0	0	0	0	0	0	0	0	0	0	0
d__Bacteria	k__norank_d__Bacteria	p__Proteobacteria	c__Gammaproteobacteria	o__Burkholderiales	f__Rhodocyclaceae	g__Uliginosibacterium	s__unclassified_g__Uliginosibacterium	ASV3636	43	4.86496e-05	0	43	0	0	0	0	0	0	0	0	0	0	0	0	0	0
d__Bacteria	k__norank_d__Bacteria	p__Actinobacteriota	c__Actinobacteria	o__Corynebacteriales	f__Mycobacteriaceae	g__Mycobacterium	s__unclassified_g__Mycobacterium	ASV2570	40	4.52554e-05	0	0	40	0	0	0	0	0	0	0	0	0	0	0	0	0
d__Bacteria	k__norank_d__Bacteria	p__Proteobacteria	c__Alphaproteobacteria	o__Micavibrionales	f__norank_o__Micavibrionales	g__norank_f__norank_o__Micavibrionales	s__Alphaproteobacteria_bacterium_CG1_02_46_17	ASV1796	42	4.75182e-05	0	0	0	42	0	0	0	0	0	0	0	0	0	0	0	0
d__Bacteria	k__norank_d__Bacteria	p__Acidobacteriota	c__Acidobacteriae	o__Subgroup_2	f__norank_o__Subgroup_2	g__norank_f__norank_o__Subgroup_2	s__uncultured_Acidobacteria_bacterium_g__norank_f__norank_o__Subgroup_2	ASV3648	40	4.52554e-05	0	40	0	0	0	0	0	0	0	0	0	0	0	0	0	0
d__Bacteria	k__norank_d__Bacteria	p__Firmicutes	c__Bacilli	o__Lactobacillales	f__Leuconostocaceae	g__Weissella	s__Weissella_ghanensis	ASV1800	42	4.75182e-05	0	0	0	42	0	0	0	0	0	0	0	0	0	0	0	0
d__Bacteria	k__norank_d__Bacteria	p__Spirochaetota	c__Spirochaetia	o__Spirochaetales	f__Spirochaetaceae	g__Treponema	s__Treponema_zuelzerae	ASV2572	40	4.52554e-05	0	0	40	0	0	0	0	0	0	0	0	0	0	0	0	0
d__Bacteria	k__norank_d__Bacteria	p__Proteobacteria	c__Gammaproteobacteria	o__Burkholderiales	f__Rhodocyclaceae	g__Dechloromonas	s__uncultured_beta_proteobacterium_g__Dechloromonas	ASV2567	40	4.52554e-05	0	0	40	0	0	0	0	0	0	0	0	0	0	0	0	0
d__Bacteria	k__norank_d__Bacteria	p__Actinobacteriota	c__Actinobacteria	o__Frankiales	f__Acidothermaceae	g__Acidothermus	s__unclassified_g__Acidothermus	ASV3646	41	4.63868e-05	0	41	0	0	0	0	0	0	0	0	0	0	0	0	0	0
d__Bacteria	k__norank_d__Bacteria	p__Bacteroidota	c__Bacteroidia	o__Bacteroidales	f__unclassified_o__Bacteroidales	g__unclassified_o__Bacteroidales	s__unclassified_o__Bacteroidales	ASV2568	40	4.52554e-05	0	0	40	0	0	0	0	0	0	0	0	0	0	0	0	0
d__Bacteria	k__norank_d__Bacteria	p__Bacteroidota	c__Bacteroidia	o__Flavobacteriales	f__Weeksellaceae	g__Moheibacter	s__uncultured_compost_bacterium_g__Moheibacter	ASV483	38	4.29927e-05	0	0	0	0	9	2	0	27	0	0	0	0	0	0	0	0
d__Bacteria	k__norank_d__Bacteria	p__Proteobacteria	c__Gammaproteobacteria	o__Burkholderiales	f__Oxalobacteraceae	g__unclassified_f__Oxalobacteraceae	s__unclassified_f__Oxalobacteraceae	ASV1811	40	4.52554e-05	0	0	0	40	0	0	0	0	0	0	0	0	0	0	0	0
d__Bacteria	k__norank_d__Bacteria	p__Proteobacteria	c__Alphaproteobacteria	o__Rhizobiales	f__Beijerinckiaceae	g__Methylobacterium-Methylorubrum	s__unclassified_g__Methylobacterium-Methylorubrum	ASV2253	39	4.4124e-05	0	21	0	0	0	0	0	0	0	0	9	9	0	0	0	0
d__Bacteria	k__norank_d__Bacteria	p__Firmicutes	c__Clostridia	o__Peptostreptococcales-Tissierellales	f__Anaerovoracaceae	g__Family_XIII_AD3011_group	s__uncultured_organism_g__Family_XIII_AD3011_group	ASV419	39	4.4124e-05	0	0	0	0	16	23	0	0	0	0	0	0	0	0	0	0
d__Bacteria	k__norank_d__Bacteria	p__Actinobacteriota	c__Actinobacteria	o__Corynebacteriales	f__Mycobacteriaceae	g__Mycobacterium	s__unclassified_g__Mycobacterium	ASV3650	41	4.63868e-05	0	41	0	0	0	0	0	0	0	0	0	0	0	0	0	0
d__Bacteria	k__norank_d__Bacteria	p__Proteobacteria	c__Alphaproteobacteria	o__Rickettsiales	f__Mitochondria	g__norank_f__Mitochondria	s__unclassified_g__norank_f__Mitochondria	ASV3652	39	4.4124e-05	0	39	0	0	0	0	0	0	0	0	0	0	0	0	0	0
d__Bacteria	k__norank_d__Bacteria	p__Proteobacteria	c__Gammaproteobacteria	o__Burkholderiales	f__Comamonadaceae	g__unclassified_f__Comamonadaceae	s__unclassified_f__Comamonadaceae	ASV2579	38	4.29927e-05	0	0	38	0	0	0	0	0	0	0	0	0	0	0	0	0
d__Bacteria	k__norank_d__Bacteria	p__Proteobacteria	c__Gammaproteobacteria	o__Burkholderiales	f__Burkholderiaceae	g__Burkholderia-Caballeronia-Paraburkholderia	s__unclassified_g__Burkholderia-Caballeronia-Paraburkholderia	ASV2585	36	4.07299e-05	0	0	36	0	0	0	0	0	0	0	0	0	0	0	0	0
d__Bacteria	k__norank_d__Bacteria	p__Firmicutes	c__Clostridia	o__Lachnospirales	f__Lachnospiraceae	g__Lachnoclostridium	s__unclassified_g__Lachnoclostridium	ASV2576	41	4.63868e-05	0	0	41	0	0	0	0	0	0	0	0	0	0	0	0	0
d__Bacteria	k__norank_d__Bacteria	p__Actinobacteriota	c__Acidimicrobiia	o__Microtrichales	f__Ilumatobacteraceae	g__CL500-29_marine_group	s__unclassified_g__CL500-29_marine_group	ASV1808	40	4.52554e-05	0	0	0	40	0	0	0	0	0	0	0	0	0	0	0	0
d__Bacteria	k__norank_d__Bacteria	p__Firmicutes	c__Clostridia	o__Lachnospirales	f__Lachnospiraceae	g__Eubacterium_ventriosum_group	s__unclassified_g__Eubacterium_ventriosum_group	ASV1302	38	4.29927e-05	0	0	0	0	0	5	25	0	0	0	1	0	0	0	7	0
d__Bacteria	k__norank_d__Bacteria	p__Firmicutes	c__Clostridia	o__Lachnospirales	f__Lachnospiraceae	g__Lachnospiraceae_ND3007_group	s__uncultured_Clostridiales_bacterium_g__Lachnospiraceae_ND3007_group	ASV2931	40	4.52554e-05	0	0	0	0	0	0	40	0	0	0	0	0	0	0	0	0
d__Bacteria	k__norank_d__Bacteria	p__Acidobacteriota	c__Acidobacteriae	o__Bryobacterales	f__Bryobacteraceae	g__Bryobacter	s__unclassified_g__Bryobacter	ASV3649	41	4.63868e-05	0	41	0	0	0	0	0	0	0	0	0	0	0	0	0	0
d__Bacteria	k__norank_d__Bacteria	p__Proteobacteria	c__Gammaproteobacteria	o__Run-SP154	f__norank_o__Run-SP154	g__norank_f__norank_o__Run-SP154	s__uncultured_Chromatiales_bacterium_g__norank_f__norank_o__Run-SP154	ASV2578	34	3.84671e-05	0	0	34	0	0	0	0	0	0	0	0	0	0	0	0	0
d__Bacteria	k__norank_d__Bacteria	p__Proteobacteria	c__Gammaproteobacteria	o__Enterobacterales	f__Enterobacteriaceae	g__unclassified_f__Enterobacteriaceae	s__unclassified_f__Enterobacteriaceae	ASV1814	40	4.52554e-05	0	0	0	40	0	0	0	0	0	0	0	0	0	0	0	0
d__Bacteria	k__norank_d__Bacteria	p__Proteobacteria	c__Gammaproteobacteria	o__Burkholderiales	f__Rhodocyclaceae	g__unclassified_f__Rhodocyclaceae	s__unclassified_f__Rhodocyclaceae	ASV2586	34	3.84671e-05	0	0	34	0	0	0	0	0	0	0	0	0	0	0	0	0
d__Bacteria	k__norank_d__Bacteria	p__Proteobacteria	c__Gammaproteobacteria	o__Burkholderiales	f__Rhodocyclaceae	g__Candidatus_Accumulibacter	s__unclassified_g__Candidatus_Accumulibacter	ASV2584	34	3.84671e-05	0	0	34	0	0	0	0	0	0	0	0	0	0	0	0	0
d__Bacteria	k__norank_d__Bacteria	p__Acidobacteriota	c__Acidobacteriae	o__Solibacterales	f__Solibacteraceae	g__Candidatus_Solibacter	s__unclassified_g__Candidatus_Solibacter	ASV3651	39	4.4124e-05	0	39	0	0	0	0	0	0	0	0	0	0	0	0	0	0
d__Bacteria	k__norank_d__Bacteria	p__Proteobacteria	c__Gammaproteobacteria	o__Burkholderiales	f__Oxalobacteraceae	g__Massilia	s__unclassified_g__Massilia	ASV2574	38	4.29927e-05	0	0	38	0	0	0	0	0	0	0	0	0	0	0	0	0
d__Bacteria	k__norank_d__Bacteria	p__Proteobacteria	c__Gammaproteobacteria	o__Burkholderiales	f__Rhodocyclaceae	g__Propionivibrio	s__uncultured_bacterium_g__Propionivibrio	ASV1812	40	4.52554e-05	0	0	0	40	0	0	0	0	0	0	0	0	0	0	0	0
d__Bacteria	k__norank_d__Bacteria	p__Proteobacteria	c__Gammaproteobacteria	o__Xanthomonadales	f__Xanthomonadaceae	g__unclassified_f__Xanthomonadaceae	s__unclassified_f__Xanthomonadaceae	ASV1810	37	4.18613e-05	0	0	0	37	0	0	0	0	0	0	0	0	0	0	0	0
d__Bacteria	k__norank_d__Bacteria	p__Proteobacteria	c__Gammaproteobacteria	o__Pasteurellales	f__Pasteurellaceae	g__Haemophilus	s__unclassified_g__Haemophilus	ASV2573	38	4.29927e-05	0	0	38	0	0	0	0	0	0	0	0	0	0	0	0	0
d__Bacteria	k__norank_d__Bacteria	p__Proteobacteria	c__Gammaproteobacteria	o__Burkholderiales	f__Aquaspirillaceae	g__Rivicola	s__unclassified_g__Rivicola	ASV2583	40	4.52554e-05	0	0	40	0	0	0	0	0	0	0	0	0	0	0	0	0
d__Bacteria	k__norank_d__Bacteria	p__Acidobacteriota	c__Acidobacteriae	o__Solibacterales	f__Solibacteraceae	g__Candidatus_Solibacter	s__unclassified_g__Candidatus_Solibacter	ASV3653	37	4.18613e-05	0	37	0	0	0	0	0	0	0	0	0	0	0	0	0	0
d__Bacteria	k__norank_d__Bacteria	p__Proteobacteria	c__Gammaproteobacteria	o__Burkholderiales	f__Comamonadaceae	g__unclassified_f__Comamonadaceae	s__unclassified_f__Comamonadaceae	ASV2580	35	3.95985e-05	0	0	35	0	0	0	0	0	0	0	0	0	0	0	0	0
d__Bacteria	k__norank_d__Bacteria	p__Firmicutes	c__Clostridia	o__Lachnospirales	f__Lachnospiraceae	g__CHKCI001	s__uncultured_bacterium_g__CHKCI001	ASV1813	43	4.86496e-05	0	0	0	43	0	0	0	0	0	0	0	0	0	0	0	0
d__Bacteria	k__norank_d__Bacteria	p__Proteobacteria	c__Gammaproteobacteria	o__Burkholderiales	f__Nitrosomonadaceae	g__DSSD61	s__uncultured_bacterium_g__DSSD61	ASV4797	37	4.18613e-05	0	0	0	0	0	0	0	15	0	0	0	6	3	0	13	0
d__Bacteria	k__norank_d__Bacteria	p__Proteobacteria	c__Alphaproteobacteria	o__Defluviicoccales	f__Defluviicoccaceae	g__Defluviicoccus	s__metagenome_g__Defluviicoccus	ASV2958	39	4.4124e-05	0	0	0	0	0	0	23	0	0	0	0	16	0	0	0	0
d__Bacteria	k__norank_d__Bacteria	p__Proteobacteria	c__Gammaproteobacteria	o__Burkholderiales	f__Comamonadaceae	g__unclassified_f__Comamonadaceae	s__unclassified_f__Comamonadaceae	ASV2589	37	4.18613e-05	0	0	37	0	0	0	0	0	0	0	0	0	0	0	0	0
d__Bacteria	k__norank_d__Bacteria	p__Proteobacteria	c__Alphaproteobacteria	o__Sphingomonadales	f__Sphingomonadaceae	g__Novosphingobium	s__unclassified_g__Novosphingobium	ASV2592	37	4.18613e-05	0	0	37	0	0	0	0	0	0	0	0	0	0	0	0	0
d__Bacteria	k__norank_d__Bacteria	p__Proteobacteria	c__Gammaproteobacteria	o__Burkholderiales	f__Rhodocyclaceae	g__unclassified_f__Rhodocyclaceae	s__unclassified_f__Rhodocyclaceae	ASV2587	37	4.18613e-05	0	0	37	0	0	0	0	0	0	0	0	0	0	0	0	0
d__Bacteria	k__norank_d__Bacteria	p__Actinobacteriota	c__Thermoleophilia	o__Gaiellales	f__norank_o__Gaiellales	g__norank_f__norank_o__Gaiellales	s__unclassified_g__norank_f__norank_o__Gaiellales	ASV3655	37	4.18613e-05	0	37	0	0	0	0	0	0	0	0	0	0	0	0	0	0
d__Bacteria	k__norank_d__Bacteria	p__Acidobacteriota	c__Acidobacteriae	o__Acidobacteriales	f__Acidobacteriaceae_Subgroup_1	g__Acidipila	s__unclassified_g__Acidipila	ASV3656	37	4.18613e-05	0	37	0	0	0	0	0	0	0	0	0	0	0	0	0	0
d__Bacteria	k__norank_d__Bacteria	p__Proteobacteria	c__Gammaproteobacteria	o__Burkholderiales	f__Comamonadaceae	g__Schlegelella	s__unclassified_g__Schlegelella	ASV173	34	3.84671e-05	0	0	0	0	9	4	12	0	0	0	0	6	0	3	0	0
d__Bacteria	k__norank_d__Bacteria	p__Proteobacteria	c__Alphaproteobacteria	o__Rhizobiales	f__unclassified_o__Rhizobiales	g__unclassified_o__Rhizobiales	s__unclassified_o__Rhizobiales	ASV3039	39	4.4124e-05	0	0	0	0	0	0	13	16	0	0	0	3	0	0	7	0
d__Bacteria	k__norank_d__Bacteria	p__Bacteroidota	c__Bacteroidia	o__Bacteroidales	f__Marinilabiliaceae	g__Cytophaga_xylanolytica_group	s__Cytophaga_xylanolytica	ASV1816	36	4.07299e-05	0	0	0	36	0	0	0	0	0	0	0	0	0	0	0	0
d__Bacteria	k__norank_d__Bacteria	p__Firmicutes	c__Clostridia	o__Lachnospirales	f__Lachnospiraceae	g__Lachnospira	s__unclassified_g__Lachnospira	ASV380	39	4.4124e-05	0	0	0	0	28	0	0	9	0	2	0	0	0	0	0	0
d__Bacteria	k__norank_d__Bacteria	p__Firmicutes	c__Clostridia	o__Oscillospirales	f__Ruminococcaceae	g__Negativibacillus	s__uncultured_bacterium_g__Negativibacillus	ASV23	40	4.52554e-05	0	0	0	0	0	0	0	10	0	0	0	0	4	26	0	0
d__Bacteria	k__norank_d__Bacteria	p__Firmicutes	c__Bacilli	o__Lactobacillales	f__Enterococcaceae	g__Enterococcus	s__unclassified_g__Enterococcus	ASV356	38	4.29927e-05	0	0	0	0	38	0	0	0	0	0	0	0	0	0	0	0
d__Bacteria	k__norank_d__Bacteria	p__Acidobacteriota	c__Acidobacteriae	o__Subgroup_2	f__norank_o__Subgroup_2	g__norank_f__norank_o__Subgroup_2	s__unclassified_g__norank_f__norank_o__Subgroup_2	ASV94	36	4.07299e-05	0	0	0	0	0	0	27	0	0	3	0	0	0	6	0	0
d__Bacteria	k__norank_d__Bacteria	p__Actinobacteriota	c__Actinobacteria	o__Propionibacteriales	f__Nocardioidaceae	g__Marmoricola	s__unclassified_g__Marmoricola	ASV2591	38	4.29927e-05	0	0	38	0	0	0	0	0	0	0	0	0	0	0	0	0
d__Bacteria	k__norank_d__Bacteria	p__Proteobacteria	c__Gammaproteobacteria	o__Gammaproteobacteria_Incertae_Sedis	f__unclassified_o__Gammaproteobacteria_Incertae_Sedis	g__Acidibacter	s__unclassified_g__Acidibacter	ASV3658	36	4.07299e-05	0	36	0	0	0	0	0	0	0	0	0	0	0	0	0	0
d__Bacteria	k__norank_d__Bacteria	p__Bacteroidota	c__Bacteroidia	o__Bacteroidales	f__Paludibacteraceae	g__Paludibacter	s__Paludibacter_jiangxiensis	ASV1818	41	4.63868e-05	0	0	0	41	0	0	0	0	0	0	0	0	0	0	0	0
d__Bacteria	k__norank_d__Bacteria	p__Bacteroidota	c__Kapabacteria	o__Kapabacteriales	f__norank_o__Kapabacteriales	g__norank_f__norank_o__Kapabacteriales	s__uncultured_bacterium_g__norank_f__norank_o__Kapabacteriales	ASV2590	36	4.07299e-05	0	0	36	0	0	0	0	0	0	0	0	0	0	0	0	0
d__Bacteria	k__norank_d__Bacteria	p__Acidobacteriota	c__Acidobacteriae	o__Subgroup_13	f__norank_o__Subgroup_13	g__norank_f__norank_o__Subgroup_13	s__unclassified_g__norank_f__norank_o__Subgroup_13	ASV3657	38	4.29927e-05	0	38	0	0	0	0	0	0	0	0	0	0	0	0	0	0
d__Bacteria	k__norank_d__Bacteria	p__Proteobacteria	c__Gammaproteobacteria	o__Burkholderiales	f__Rhodocyclaceae	g__Candidatus_Accumulibacter	s__unclassified_g__Candidatus_Accumulibacter	ASV2588	36	4.07299e-05	0	0	36	0	0	0	0	0	0	0	0	0	0	0	0	0
d__Bacteria	k__norank_d__Bacteria	p__Proteobacteria	c__Gammaproteobacteria	o__Burkholderiales	f__Rhodocyclaceae	g__unclassified_f__Rhodocyclaceae	s__unclassified_f__Rhodocyclaceae	ASV1820	39	4.4124e-05	0	0	0	39	0	0	0	0	0	0	0	0	0	0	0	0
d__Bacteria	k__norank_d__Bacteria	p__Actinobacteriota	c__Acidimicrobiia	o__Microtrichales	f__Microtrichaceae	g__norank_f__Microtrichaceae	s__unclassified_g__norank_f__Microtrichaceae	ASV1844	42	4.75182e-05	0	0	0	38	0	0	0	0	0	0	0	4	0	0	0	0
d__Bacteria	k__norank_d__Bacteria	p__Firmicutes	c__Clostridia	o__Lachnospirales	f__Lachnospiraceae	g__unclassified_f__Lachnospiraceae	s__unclassified_f__Lachnospiraceae	ASV1895	38	4.29927e-05	0	0	0	26	0	0	12	0	0	0	0	0	0	0	0	0
d__Bacteria	k__norank_d__Bacteria	p__Actinobacteriota	c__Thermoleophilia	o__Solirubrobacterales	f__unclassified_o__Solirubrobacterales	g__unclassified_o__Solirubrobacterales	s__unclassified_o__Solirubrobacterales	ASV1819	38	4.29927e-05	0	0	0	38	0	0	0	0	0	0	0	0	0	0	0	0
d__Bacteria	k__norank_d__Bacteria	p__unclassified_k__norank_d__Bacteria	c__unclassified_k__norank_d__Bacteria	o__unclassified_k__norank_d__Bacteria	f__unclassified_k__norank_d__Bacteria	g__unclassified_k__norank_d__Bacteria	s__unclassified_k__norank_d__Bacteria	ASV1817	37	4.18613e-05	0	0	0	37	0	0	0	0	0	0	0	0	0	0	0	0
d__Bacteria	k__norank_d__Bacteria	p__Actinobacteriota	c__Thermoleophilia	o__Solirubrobacterales	f__Solirubrobacteraceae	g__Conexibacter	s__uncultured_Actinomycetales_bacterium_g__Conexibacter	ASV2702	33	3.73357e-05	0	0	24	0	0	0	9	0	0	0	0	0	0	0	0	0
d__Bacteria	k__norank_d__Bacteria	p__Actinobacteriota	c__Thermoleophilia	o__Solirubrobacterales	f__Solirubrobacteraceae	g__Conexibacter	s__unclassified_g__Conexibacter	ASV3660	37	4.18613e-05	0	37	0	0	0	0	0	0	0	0	0	0	0	0	0	0
d__Bacteria	k__norank_d__Bacteria	p__Proteobacteria	c__Gammaproteobacteria	o__Burkholderiales	f__Rhodocyclaceae	g__Thauera	s__unclassified_g__Thauera	ASV2593	35	3.95985e-05	0	0	35	0	0	0	0	0	0	0	0	0	0	0	0	0
d__Bacteria	k__norank_d__Bacteria	p__Acidobacteriota	c__Acidobacteriae	o__Subgroup_2	f__norank_o__Subgroup_2	g__norank_f__norank_o__Subgroup_2	s__unclassified_g__norank_f__norank_o__Subgroup_2	ASV3661	38	4.29927e-05	0	38	0	0	0	0	0	0	0	0	0	0	0	0	0	0
d__Bacteria	k__norank_d__Bacteria	p__Bacteroidota	c__Bacteroidia	o__Bacteroidales	f__Bacteroidaceae	g__Bacteroides	s__unclassified_g__Bacteroides	ASV2932	35	3.95985e-05	0	0	0	0	0	0	35	0	0	0	0	0	0	0	0	0
d__Bacteria	k__norank_d__Bacteria	p__Proteobacteria	c__Gammaproteobacteria	o__Enterobacterales	f__Enterobacteriaceae	g__unclassified_f__Enterobacteriaceae	s__unclassified_f__Enterobacteriaceae	ASV3743	36	4.07299e-05	0	28	0	0	0	0	0	0	0	0	0	8	0	0	0	0
d__Bacteria	k__norank_d__Bacteria	p__Firmicutes	c__Clostridia	o__Oscillospirales	f__Oscillospiraceae	g__UCG-002	s__unclassified_g__UCG-002	ASV416	36	4.07299e-05	0	0	0	0	16	9	0	11	0	0	0	0	0	0	0	0
d__Bacteria	k__norank_d__Bacteria	p__Actinobacteriota	c__Actinobacteria	o__Frankiales	f__Acidothermaceae	g__Acidothermus	s__unclassified_g__Acidothermus	ASV3662	40	4.52554e-05	0	40	0	0	0	0	0	0	0	0	0	0	0	0	0	0
d__Bacteria	k__norank_d__Bacteria	p__Proteobacteria	c__Gammaproteobacteria	o__Gammaproteobacteria_Incertae_Sedis	f__unclassified_o__Gammaproteobacteria_Incertae_Sedis	g__Acidibacter	s__unclassified_g__Acidibacter	ASV3674	34	3.84671e-05	0	34	0	0	0	0	0	0	0	0	0	0	0	0	0	0
d__Bacteria	k__norank_d__Bacteria	p__Proteobacteria	c__Gammaproteobacteria	o__Alteromonadales	f__Alteromonadaceae	g__Rheinheimera	s__unclassified_g__Rheinheimera	ASV1436	33	3.73357e-05	22	0	0	8	0	3	0	0	0	0	0	0	0	0	0	0
d__Bacteria	k__norank_d__Bacteria	p__Firmicutes	c__Clostridia	o__Clostridiales	f__Clostridiaceae	g__Clostridium_sensu_stricto_1	s__unclassified_g__Clostridium_sensu_stricto_1	ASV1822	35	3.95985e-05	0	0	0	35	0	0	0	0	0	0	0	0	0	0	0	0
d__Bacteria	k__norank_d__Bacteria	p__RCP2-54	c__norank_p__RCP2-54	o__norank_c__norank_p__RCP2-54	f__norank_o__norank_c__norank_p__RCP2-54	g__norank_f__norank_o__norank_c__norank_p__RCP2-54	s__uncultured_bacterium_g__norank_f__norank_o__norank_c__norank_p__RCP2-54	ASV3675	38	4.29927e-05	0	38	0	0	0	0	0	0	0	0	0	0	0	0	0	0
d__Bacteria	k__norank_d__Bacteria	p__Bacteroidota	c__Bacteroidia	o__Bacteroidales	f__Prolixibacteraceae	g__WCHB1-32	s__unclassified_g__WCHB1-32	ASV2599	36	4.07299e-05	0	0	36	0	0	0	0	0	0	0	0	0	0	0	0	0
d__Bacteria	k__norank_d__Bacteria	p__Proteobacteria	c__Alphaproteobacteria	o__Rhizobiales	f__Beijerinckiaceae	g__Methylobacterium-Methylorubrum	s__Methylobacterium_hispanicum	ASV3671	37	4.18613e-05	0	37	0	0	0	0	0	0	0	0	0	0	0	0	0	0
d__Bacteria	k__norank_d__Bacteria	p__Firmicutes	c__Clostridia	o__Lachnospirales	f__Lachnospiraceae	g__Coprococcus	s__Coprococcus_eutactus	ASV442	33	3.73357e-05	0	0	0	0	13	0	0	20	0	0	0	0	0	0	0	0
d__Bacteria	k__norank_d__Bacteria	p__Firmicutes	c__Bacilli	o__Lactobacillales	f__Listeriaceae	g__Brochothrix	s__unclassified_g__Brochothrix	ASV360	33	3.73357e-05	0	0	0	0	33	0	0	0	0	0	0	0	0	0	0	0
d__Bacteria	k__norank_d__Bacteria	p__Proteobacteria	c__Alphaproteobacteria	o__Acetobacterales	f__Acetobacteraceae	g__unclassified_f__Acetobacteraceae	s__unclassified_f__Acetobacteraceae	ASV3668	39	4.4124e-05	0	39	0	0	0	0	0	0	0	0	0	0	0	0	0	0
d__Bacteria	k__norank_d__Bacteria	p__RCP2-54	c__norank_p__RCP2-54	o__norank_c__norank_p__RCP2-54	f__norank_o__norank_c__norank_p__RCP2-54	g__norank_f__norank_o__norank_c__norank_p__RCP2-54	s__unclassified_g__norank_f__norank_o__norank_c__norank_p__RCP2-54	ASV3667	40	4.52554e-05	0	40	0	0	0	0	0	0	0	0	0	0	0	0	0	0
d__Bacteria	k__norank_d__Bacteria	p__Actinobacteriota	c__Actinobacteria	o__Frankiales	f__Acidothermaceae	g__Acidothermus	s__uncultured_bacterium_g__Acidothermus	ASV2596	38	4.29927e-05	0	0	38	0	0	0	0	0	0	0	0	0	0	0	0	0
d__Bacteria	k__norank_d__Bacteria	p__Verrucomicrobiota	c__Verrucomicrobiae	o__Pedosphaerales	f__Pedosphaeraceae	g__Pedosphaera	s__uncultured_bacterium_g__Pedosphaera	ASV3663	39	4.4124e-05	0	39	0	0	0	0	0	0	0	0	0	0	0	0	0	0
d__Bacteria	k__norank_d__Bacteria	p__Acidobacteriota	c__Acidobacteriae	o__Acidobacteriales	f__Koribacteraceae	g__Candidatus_Koribacter	s__unclassified_g__Candidatus_Koribacter	ASV3665	36	4.07299e-05	0	36	0	0	0	0	0	0	0	0	0	0	0	0	0	0
d__Bacteria	k__norank_d__Bacteria	p__Proteobacteria	c__Alphaproteobacteria	o__Micropepsales	f__Micropepsaceae	g__norank_f__Micropepsaceae	s__uncultured_bacterium_g__norank_f__Micropepsaceae	ASV3673	39	4.4124e-05	0	39	0	0	0	0	0	0	0	0	0	0	0	0	0	0
d__Bacteria	k__norank_d__Bacteria	p__Bacteroidota	c__Bacteroidia	o__Bacteroidales	f__Paludibacteraceae	g__H1	s__uncultured_bacterium_g__H1	ASV1150	35	3.95985e-05	0	0	26	0	0	9	0	0	0	0	0	0	0	0	0	0
d__Bacteria	k__norank_d__Bacteria	p__Fusobacteriota	c__Fusobacteriia	o__Fusobacteriales	f__Leptotrichiaceae	g__Hypnocyclicus	s__uncultured_bacterium_g__Hypnocyclicus	ASV2670	36	4.07299e-05	0	8	28	0	0	0	0	0	0	0	0	0	0	0	0	0
d__Bacteria	k__norank_d__Bacteria	p__Myxococcota	c__Polyangia	o__Polyangiales	f__Polyangiaceae	g__Pajaroellobacter	s__uncultured_bacterium_g__Pajaroellobacter	ASV3666	37	4.18613e-05	0	37	0	0	0	0	0	0	0	0	0	0	0	0	0	0
d__Bacteria	k__norank_d__Bacteria	p__Actinobacteriota	c__Actinobacteria	o__Bifidobacteriales	f__Bifidobacteriaceae	g__Bifidobacterium	s__unclassified_g__Bifidobacterium	ASV249	37	4.18613e-05	0	0	0	0	18	9	9	0	0	0	0	0	0	1	0	0
d__Bacteria	k__norank_d__Bacteria	p__Actinobacteriota	c__Acidimicrobiia	o__Microtrichales	f__Ilumatobacteraceae	g__Ilumatobacter	s__unclassified_g__Ilumatobacter	ASV2594	37	4.18613e-05	0	0	37	0	0	0	0	0	0	0	0	0	0	0	0	0
d__Bacteria	k__norank_d__Bacteria	p__Actinobacteriota	c__Actinobacteria	o__Corynebacteriales	f__Corynebacteriaceae	g__Corynebacterium	s__Corynebacterium_glucuronolyticum	ASV2595	40	4.52554e-05	0	0	40	0	0	0	0	0	0	0	0	0	0	0	0	0
d__Bacteria	k__norank_d__Bacteria	p__Firmicutes	c__Bacilli	o__Exiguobacterales	f__Exiguobacteraceae	g__Exiguobacterium	s__unclassified_g__Exiguobacterium	ASV1824	38	4.29927e-05	0	0	0	38	0	0	0	0	0	0	0	0	0	0	0	0
d__Bacteria	k__norank_d__Bacteria	p__Actinobacteriota	c__Acidimicrobiia	o__IMCC26256	f__norank_o__IMCC26256	g__norank_f__norank_o__IMCC26256	s__unclassified_g__norank_f__norank_o__IMCC26256	ASV3672	38	4.29927e-05	0	38	0	0	0	0	0	0	0	0	0	0	0	0	0	0
d__Bacteria	k__norank_d__Bacteria	p__Bacteroidota	c__Bacteroidia	o__Bacteroidales	f__Paludibacteraceae	g__Paludibacter	s__unclassified_g__Paludibacter	ASV2598	39	4.4124e-05	0	0	39	0	0	0	0	0	0	0	0	0	0	0	0	0
d__Bacteria	k__norank_d__Bacteria	p__Acidobacteriota	c__Acidobacteriae	o__Bryobacterales	f__Bryobacteraceae	g__Bryobacter	s__unclassified_g__Bryobacter	ASV3664	39	4.4124e-05	0	39	0	0	0	0	0	0	0	0	0	0	0	0	0	0
d__Bacteria	k__norank_d__Bacteria	p__Firmicutes	c__Clostridia	o__Lachnospirales	f__Lachnospiraceae	g__Eubacterium_eligens_group	s__unclassified_g__Eubacterium_eligens_group	ASV613	36	4.07299e-05	0	0	0	0	6	13	0	16	0	0	0	0	1	0	0	0
d__Bacteria	k__norank_d__Bacteria	p__Armatimonadota	c__Fimbriimonadia	o__Fimbriimonadales	f__Fimbriimonadaceae	g__norank_f__Fimbriimonadaceae	s__unclassified_g__norank_f__Fimbriimonadaceae	ASV3669	38	4.29927e-05	0	38	0	0	0	0	0	0	0	0	0	0	0	0	0	0
d__Bacteria	k__norank_d__Bacteria	p__Proteobacteria	c__Gammaproteobacteria	o__Enterobacterales	f__Erwiniaceae	g__Pantoea	s__unclassified_g__Pantoea	ASV379	36	4.07299e-05	0	0	0	0	27	0	0	0	0	0	0	0	0	0	5	4
d__Bacteria	k__norank_d__Bacteria	p__Myxococcota	c__Polyangia	o__Haliangiales	f__Haliangiaceae	g__Haliangium	s__uncultured_Myxococcales_bacterium_g__Haliangium	ASV1498	38	4.29927e-05	0	0	36	0	0	2	0	0	0	0	0	0	0	0	0	0
d__Bacteria	k__norank_d__Bacteria	p__Acidobacteriota	c__Acidobacteriae	o__Bryobacterales	f__Bryobacteraceae	g__Bryobacter	s__uncultured_Acidobacteria_bacterium_g__Bryobacter	ASV3670	39	4.4124e-05	0	39	0	0	0	0	0	0	0	0	0	0	0	0	0	0
d__Bacteria	k__norank_d__Bacteria	p__Proteobacteria	c__Alphaproteobacteria	o__Rickettsiales	f__Mitochondria	g__norank_f__Mitochondria	s__unclassified_g__norank_f__Mitochondria	ASV2212	31	3.5073e-05	18	0	13	0	0	0	0	0	0	0	0	0	0	0	0	0
d__Bacteria	k__norank_d__Bacteria	p__Actinobacteriota	c__Thermoleophilia	o__Gaiellales	f__Gaiellaceae	g__Gaiella	s__unclassified_g__Gaiella	ASV2597	38	4.29927e-05	0	0	38	0	0	0	0	0	0	0	0	0	0	0	0	0
d__Bacteria	k__norank_d__Bacteria	p__Proteobacteria	c__Gammaproteobacteria	o__Enterobacterales	f__Erwiniaceae	g__Pantoea	s__unclassified_g__Pantoea	ASV1833	40	4.52554e-05	0	0	0	40	0	0	0	0	0	0	0	0	0	0	0	0
d__Bacteria	k__norank_d__Bacteria	p__Proteobacteria	c__Alphaproteobacteria	o__Rhizobiales	f__Rhizobiaceae	g__Ochrobactrum	s__unclassified_g__Ochrobactrum	ASV882	39	4.4124e-05	0	0	36	0	3	0	0	0	0	0	0	0	0	0	0	0
d__Bacteria	k__norank_d__Bacteria	p__Chloroflexi	c__Ktedonobacteria	o__Ktedonobacterales	f__JG30-KF-AS9	g__norank_f__JG30-KF-AS9	s__uncultured_bacterium_g__norank_f__JG30-KF-AS9	ASV3676	37	4.18613e-05	0	37	0	0	0	0	0	0	0	0	0	0	0	0	0	0
d__Bacteria	k__norank_d__Bacteria	p__Acidobacteriota	c__Acidobacteriae	o__Subgroup_2	f__norank_o__Subgroup_2	g__norank_f__norank_o__Subgroup_2	s__unclassified_g__norank_f__norank_o__Subgroup_2	ASV1039	35	3.95985e-05	0	0	0	0	0	26	0	0	0	0	0	0	0	0	9	0
d__Bacteria	k__norank_d__Bacteria	p__Chloroflexi	c__Ktedonobacteria	o__Ktedonobacterales	f__JG30-KF-AS9	g__norank_f__JG30-KF-AS9	s__uncultured_bacterium_g__norank_f__JG30-KF-AS9	ASV3681	40	4.52554e-05	0	40	0	0	0	0	0	0	0	0	0	0	0	0	0	0
d__Bacteria	k__norank_d__Bacteria	p__Actinobacteriota	c__Thermoleophilia	o__Solirubrobacterales	f__Solirubrobacteraceae	g__norank_f__Solirubrobacteraceae	s__unclassified_g__norank_f__Solirubrobacteraceae	ASV3677	36	4.07299e-05	0	36	0	0	0	0	0	0	0	0	0	0	0	0	0	0
d__Bacteria	k__norank_d__Bacteria	p__Proteobacteria	c__Alphaproteobacteria	o__Rhizobiales	f__Beijerinckiaceae	g__alphaI_cluster	s__uncultured_bacterium_g__alphaI_cluster	ASV2189	34	3.84671e-05	34	0	0	0	0	0	0	0	0	0	0	0	0	0	0	0
d__Bacteria	k__norank_d__Bacteria	p__Proteobacteria	c__Gammaproteobacteria	o__Burkholderiales	f__Comamonadaceae	g__unclassified_f__Comamonadaceae	s__unclassified_f__Comamonadaceae	ASV1828	36	4.07299e-05	0	0	0	36	0	0	0	0	0	0	0	0	0	0	0	0
d__Bacteria	k__norank_d__Bacteria	p__Firmicutes	c__Clostridia	o__norank_c__Clostridia	f__Hungateiclostridiaceae	g__Ruminiclostridium	s__unclassified_g__Ruminiclostridium	ASV2190	32	3.62043e-05	32	0	0	0	0	0	0	0	0	0	0	0	0	0	0	0
d__Bacteria	k__norank_d__Bacteria	p__Firmicutes	c__Clostridia	o__Lachnospirales	f__Lachnospiraceae	g__Blautia	s__unclassified_g__Blautia	ASV2602	36	4.07299e-05	0	0	36	0	0	0	0	0	0	0	0	0	0	0	0	0
d__Bacteria	k__norank_d__Bacteria	p__Firmicutes	c__Clostridia	o__Lachnospirales	f__Lachnospiraceae	g__Blautia	s__Blautia_faecis	ASV1825	35	3.95985e-05	0	0	0	35	0	0	0	0	0	0	0	0	0	0	0	0
d__Bacteria	k__norank_d__Bacteria	p__Actinobacteriota	c__Actinobacteria	o__Micrococcales	f__Intrasporangiaceae	g__unclassified_f__Intrasporangiaceae	s__unclassified_f__Intrasporangiaceae	ASV3682	38	4.29927e-05	0	38	0	0	0	0	0	0	0	0	0	0	0	0	0	0
d__Bacteria	k__norank_d__Bacteria	p__Actinobacteriota	c__Actinobacteria	o__Streptomycetales	f__Streptomycetaceae	g__Streptomyces	s__unclassified_g__Streptomyces	ASV1832	38	4.29927e-05	0	0	0	38	0	0	0	0	0	0	0	0	0	0	0	0
d__Bacteria	k__norank_d__Bacteria	p__Actinobacteriota	c__Acidimicrobiia	o__Microtrichales	f__Iamiaceae	g__Iamia	s__unclassified_g__Iamia	ASV1457	40	4.52554e-05	0	0	0	0	0	3	26	0	0	0	0	0	0	0	11	0
d__Bacteria	k__norank_d__Bacteria	p__Firmicutes	c__Clostridia	o__Lachnospirales	f__Lachnospiraceae	g__unclassified_f__Lachnospiraceae	s__unclassified_f__Lachnospiraceae	ASV1831	40	4.52554e-05	0	0	0	40	0	0	0	0	0	0	0	0	0	0	0	0
d__Bacteria	k__norank_d__Bacteria	p__Proteobacteria	c__Gammaproteobacteria	o__Burkholderiales	f__Rhodocyclaceae	g__Dechloromonas	s__unclassified_g__Dechloromonas	ASV2601	34	3.84671e-05	0	0	34	0	0	0	0	0	0	0	0	0	0	0	0	0
d__Bacteria	k__norank_d__Bacteria	p__Bacteroidota	c__Bacteroidia	o__Bacteroidales	f__Prolixibacteraceae	g__WCHB1-32	s__unclassified_g__WCHB1-32	ASV1829	36	4.07299e-05	0	0	0	36	0	0	0	0	0	0	0	0	0	0	0	0
d__Bacteria	k__norank_d__Bacteria	p__Actinobacteriota	c__Acidimicrobiia	o__unclassified_c__Acidimicrobiia	f__unclassified_c__Acidimicrobiia	g__unclassified_c__Acidimicrobiia	s__unclassified_c__Acidimicrobiia	ASV3679	38	4.29927e-05	0	38	0	0	0	0	0	0	0	0	0	0	0	0	0	0
d__Bacteria	k__norank_d__Bacteria	p__Actinobacteriota	c__Actinobacteria	o__Frankiales	f__Acidothermaceae	g__Acidothermus	s__unclassified_g__Acidothermus	ASV3680	37	4.18613e-05	0	37	0	0	0	0	0	0	0	0	0	0	0	0	0	0
d__Bacteria	k__norank_d__Bacteria	p__Actinobacteriota	c__Actinobacteria	o__Frankiales	f__Frankiaceae	g__Jatrophihabitans	s__unclassified_g__Jatrophihabitans	ASV3678	38	4.29927e-05	0	38	0	0	0	0	0	0	0	0	0	0	0	0	0	0
d__Bacteria	k__norank_d__Bacteria	p__Actinobacteriota	c__Actinobacteria	o__Pseudonocardiales	f__Pseudonocardiaceae	g__Amycolatopsis	s__unclassified_g__Amycolatopsis	ASV2603	38	4.29927e-05	0	0	38	0	0	0	0	0	0	0	0	0	0	0	0	0
d__Bacteria	k__norank_d__Bacteria	p__Firmicutes	c__Bacilli	o__Lactobacillales	f__Carnobacteriaceae	g__Carnobacterium	s__unclassified_g__Carnobacterium	ASV1836	35	3.95985e-05	0	0	0	35	0	0	0	0	0	0	0	0	0	0	0	0
d__Bacteria	k__norank_d__Bacteria	p__Actinobacteriota	c__Acidimicrobiia	o__Actinomarinales	f__norank_o__Actinomarinales	g__norank_f__norank_o__Actinomarinales	s__uncultured_soil_bacterium_g__norank_f__norank_o__Actinomarinales	ASV2606	34	3.84671e-05	0	0	34	0	0	0	0	0	0	0	0	0	0	0	0	0
d__Bacteria	k__norank_d__Bacteria	p__Actinobacteriota	c__MB-A2-108	o__norank_c__MB-A2-108	f__norank_o__norank_c__MB-A2-108	g__norank_f__norank_o__norank_c__MB-A2-108	s__uncultured_bacterium_g__norank_f__norank_o__norank_c__MB-A2-108	ASV1834	35	3.95985e-05	0	0	0	35	0	0	0	0	0	0	0	0	0	0	0	0
d__Bacteria	k__norank_d__Bacteria	p__Actinobacteriota	c__Acidimicrobiia	o__IMCC26256	f__norank_o__IMCC26256	g__norank_f__norank_o__IMCC26256	s__Aciditerrimonas_sp.	ASV3688	36	4.07299e-05	0	36	0	0	0	0	0	0	0	0	0	0	0	0	0	0
d__Bacteria	k__norank_d__Bacteria	p__Firmicutes	c__Bacilli	o__Paenibacillales	f__Paenibacillaceae	g__Paenibacillus	s__unclassified_g__Paenibacillus	ASV3685	35	3.95985e-05	0	35	0	0	0	0	0	0	0	0	0	0	0	0	0	0
d__Bacteria	k__norank_d__Bacteria	p__Proteobacteria	c__Alphaproteobacteria	o__Caulobacterales	f__Caulobacteraceae	g__norank_f__Caulobacteraceae	s__uncultured_Caulobacteraceae_bacterium_g__norank	ASV2605	35	3.95985e-05	0	0	35	0	0	0	0	0	0	0	0	0	0	0	0	0
d__Bacteria	k__norank_d__Bacteria	p__Firmicutes	c__Clostridia	o__Lachnospirales	f__Lachnospiraceae	g__Lachnospiraceae_NK4A136_group	s__Lachnospiraceae_bacterium_GAM79	ASV55	35	3.95985e-05	0	0	0	0	0	0	24	0	0	0	0	0	0	11	0	0
d__Bacteria	k__norank_d__Bacteria	p__Bacteroidota	c__Bacteroidia	o__Bacteroidales	f__Bacteroidaceae	g__Bacteroides	s__Bacteroides_clarus	ASV1465	31	3.5073e-05	0	0	0	0	0	2	0	24	3	0	0	0	2	0	0	0
d__Bacteria	k__norank_d__Bacteria	p__Bacteroidota	c__Bacteroidia	o__Bacteroidales	f__Prolixibacteraceae	g__WCHB1-32	s__uncultured_soil_bacterium_g__WCHB1-32	ASV2607	38	4.29927e-05	0	0	38	0	0	0	0	0	0	0	0	0	0	0	0	0
d__Bacteria	k__norank_d__Bacteria	p__Actinobacteriota	c__Acidimicrobiia	o__Microtrichales	f__unclassified_o__Microtrichales	g__unclassified_o__Microtrichales	s__unclassified_o__Microtrichales	ASV1224	37	4.18613e-05	0	0	0	0	0	6	27	0	0	0	4	0	0	0	0	0
d__Bacteria	k__norank_d__Bacteria	p__Acidobacteriota	c__Acidobacteriae	o__Subgroup_2	f__norank_o__Subgroup_2	g__norank_f__norank_o__Subgroup_2	s__uncultured_Acidobacteriales_bacterium_g__norank_f__norank_o__Subgroup_2	ASV3684	32	3.62043e-05	0	32	0	0	0	0	0	0	0	0	0	0	0	0	0	0
d__Bacteria	k__norank_d__Bacteria	p__Firmicutes	c__Bacilli	o__Exiguobacterales	f__Exiguobacteraceae	g__Exiguobacterium	s__unclassified_g__Exiguobacterium	ASV2934	39	4.4124e-05	0	0	0	0	0	0	39	0	0	0	0	0	0	0	0	0
d__Bacteria	k__norank_d__Bacteria	p__Bacteroidota	c__Bacteroidia	o__Bacteroidales	f__Bacteroidaceae	g__Bacteroides	s__Bacteroides_plebeius	ASV1040	35	3.95985e-05	0	0	0	0	0	25	0	10	0	0	0	0	0	0	0	0
d__Bacteria	k__norank_d__Bacteria	p__Chloroflexi	c__AD3	o__norank_c__AD3	f__norank_o__norank_c__AD3	g__norank_f__norank_o__norank_c__AD3	s__unclassified_g__norank_f__norank_o__norank_c__AD3	ASV941	36	4.07299e-05	0	0	0	0	1	0	0	0	0	0	0	0	0	0	35	0
d__Bacteria	k__norank_d__Bacteria	p__Proteobacteria	c__Gammaproteobacteria	o__Burkholderiales	f__Rhodocyclaceae	g__unclassified_f__Rhodocyclaceae	s__unclassified_f__Rhodocyclaceae	ASV1838	36	4.07299e-05	0	0	0	36	0	0	0	0	0	0	0	0	0	0	0	0
d__Bacteria	k__norank_d__Bacteria	p__Acidobacteriota	c__Acidobacteriae	o__Acidobacteriales	f__unclassified_o__Acidobacteriales	g__unclassified_o__Acidobacteriales	s__unclassified_o__Acidobacteriales	ASV3686	39	4.4124e-05	0	39	0	0	0	0	0	0	0	0	0	0	0	0	0	0
d__Bacteria	k__norank_d__Bacteria	p__Firmicutes	c__Bacilli	o__Lactobacillales	f__Streptococcaceae	g__Streptococcus	s__unclassified_g__Streptococcus	ASV3687	37	4.18613e-05	0	37	0	0	0	0	0	0	0	0	0	0	0	0	0	0
d__Bacteria	k__norank_d__Bacteria	p__Actinobacteriota	c__Actinobacteria	o__Bifidobacteriales	f__Bifidobacteriaceae	g__Bifidobacterium	s__unclassified_g__Bifidobacterium	ASV2950	37	4.18613e-05	0	0	0	0	0	0	24	0	0	0	0	0	0	0	13	0
d__Bacteria	k__norank_d__Bacteria	p__Proteobacteria	c__Gammaproteobacteria	o__Burkholderiales	f__Comamonadaceae	g__unclassified_f__Comamonadaceae	s__unclassified_f__Comamonadaceae	ASV2604	38	4.29927e-05	0	0	38	0	0	0	0	0	0	0	0	0	0	0	0	0
d__Bacteria	k__norank_d__Bacteria	p__Bacteroidota	c__Kapabacteria	o__Kapabacteriales	f__norank_o__Kapabacteriales	g__norank_f__norank_o__Kapabacteriales	s__unclassified_g__norank_f__norank_o__Kapabacteriales	ASV2608	34	3.84671e-05	0	0	34	0	0	0	0	0	0	0	0	0	0	0	0	0
d__Bacteria	k__norank_d__Bacteria	p__Desulfobacterota	c__Desulfobulbia	o__Desulfobulbales	f__Desulfobulbaceae	g__Desulfobulbus	s__unclassified_g__Desulfobulbus	ASV1847	34	3.84671e-05	0	0	0	34	0	0	0	0	0	0	0	0	0	0	0	0
d__Bacteria	k__norank_d__Bacteria	p__Proteobacteria	c__Gammaproteobacteria	o__Burkholderiales	f__Rhodocyclaceae	g__Dechloromonas	s__unclassified_g__Dechloromonas	ASV1839	36	4.07299e-05	0	0	0	36	0	0	0	0	0	0	0	0	0	0	0	0
d__Bacteria	k__norank_d__Bacteria	p__Actinobacteriota	c__Actinobacteria	o__Micrococcales	f__Bogoriellaceae	g__Georgenia	s__Georgenia_muralis	ASV135	35	3.95985e-05	0	0	0	0	0	6	0	21	0	0	3	0	0	5	0	0
d__Bacteria	k__norank_d__Bacteria	p__Proteobacteria	c__Alphaproteobacteria	o__Rhizobiales	f__Beijerinckiaceae	g__unclassified_f__Beijerinckiaceae	s__unclassified_f__Beijerinckiaceae	ASV3696	35	3.95985e-05	0	35	0	0	0	0	0	0	0	0	0	0	0	0	0	0
d__Bacteria	k__norank_d__Bacteria	p__Proteobacteria	c__Gammaproteobacteria	o__Burkholderiales	f__Burkholderiaceae	g__Lautropia	s__uncultured_bacterium_g__Lautropia	ASV3694	34	3.84671e-05	0	34	0	0	0	0	0	0	0	0	0	0	0	0	0	0
d__Bacteria	k__norank_d__Bacteria	p__Verrucomicrobiota	c__Chlamydiae	o__Chlamydiales	f__Parachlamydiaceae	g__Candidatus_Metachlamydia	s__Candidatus_Metachlamydia_lacustris	ASV2192	30	3.39416e-05	30	0	0	0	0	0	0	0	0	0	0	0	0	0	0	0
d__Bacteria	k__norank_d__Bacteria	p__Firmicutes	c__Clostridia	o__Oscillospirales	f__Ruminococcaceae	g__Ruminococcus	s__uncultured_bacterium_adhufec58	ASV87	31	3.5073e-05	0	0	0	0	10	0	9	0	0	0	0	0	0	6	6	0
d__Bacteria	k__norank_d__Bacteria	p__Desulfobacterota	c__Desulfobulbia	o__Desulfobulbales	f__Desulfocapsaceae	g__Desulfobacterium_catecholicum_group	s__uncultured_bacterium_g__Desulfobacterium_catecholicum_group	ASV2612	35	3.95985e-05	0	0	35	0	0	0	0	0	0	0	0	0	0	0	0	0
d__Bacteria	k__norank_d__Bacteria	p__Actinobacteriota	c__Actinobacteria	o__Micrococcales	f__unclassified_o__Micrococcales	g__unclassified_o__Micrococcales	s__unclassified_o__Micrococcales	ASV2610	33	3.73357e-05	0	0	33	0	0	0	0	0	0	0	0	0	0	0	0	0
d__Bacteria	k__norank_d__Bacteria	p__Verrucomicrobiota	c__Kiritimatiellae	o__WCHB1-41	f__norank_o__WCHB1-41	g__norank_f__norank_o__WCHB1-41	s__bacterium_enrichment_culture_clone_JCA3	ASV1845	37	4.18613e-05	0	0	0	37	0	0	0	0	0	0	0	0	0	0	0	0
d__Bacteria	k__norank_d__Bacteria	p__Actinobacteriota	c__Thermoleophilia	o__Solirubrobacterales	f__Solirubrobacteraceae	g__unclassified_f__Solirubrobacteraceae	s__unclassified_f__Solirubrobacteraceae	ASV3692	36	4.07299e-05	0	36	0	0	0	0	0	0	0	0	0	0	0	0	0	0
d__Bacteria	k__norank_d__Bacteria	p__Proteobacteria	c__Gammaproteobacteria	o__Burkholderiales	f__Burkholderiaceae	g__Burkholderia-Caballeronia-Paraburkholderia	s__unclassified_g__Burkholderia-Caballeronia-Paraburkholderia	ASV3689	36	4.07299e-05	0	36	0	0	0	0	0	0	0	0	0	0	0	0	0	0
d__Bacteria	k__norank_d__Bacteria	p__Proteobacteria	c__Alphaproteobacteria	o__Rhizobiales	f__Beijerinckiaceae	g__Methylobacterium-Methylorubrum	s__unclassified_g__Methylobacterium-Methylorubrum	ASV2935	38	4.29927e-05	0	0	0	0	0	0	38	0	0	0	0	0	0	0	0	0
d__Bacteria	k__norank_d__Bacteria	p__Proteobacteria	c__Alphaproteobacteria	o__Acetobacterales	f__Acetobacteraceae	g__Roseomonas	s__unclassified_g__Roseomonas	ASV3729	37	4.18613e-05	0	34	0	0	0	0	0	3	0	0	0	0	0	0	0	0
d__Bacteria	k__norank_d__Bacteria	p__Bacteroidota	c__Bacteroidia	o__Bacteroidales	f__Prolixibacteraceae	g__WCHB1-32	s__unclassified_g__WCHB1-32	ASV1848	36	4.07299e-05	0	0	0	36	0	0	0	0	0	0	0	0	0	0	0	0
d__Bacteria	k__norank_d__Bacteria	p__Acidobacteriota	c__Acidobacteriae	o__Subgroup_2	f__norank_o__Subgroup_2	g__norank_f__norank_o__Subgroup_2	s__unclassified_g__norank_f__norank_o__Subgroup_2	ASV1333	29	3.28102e-05	0	0	0	0	0	5	0	14	0	0	3	7	0	0	0	0
d__Bacteria	k__norank_d__Bacteria	p__Actinobacteriota	c__Actinobacteria	o__Frankiales	f__Acidothermaceae	g__Acidothermus	s__unclassified_g__Acidothermus	ASV3693	36	4.07299e-05	0	36	0	0	0	0	0	0	0	0	0	0	0	0	0	0
d__Bacteria	k__norank_d__Bacteria	p__Actinobacteriota	c__Actinobacteria	o__Propionibacteriales	f__Propionibacteriaceae	g__Brooklawnia	s__unclassified_g__Brooklawnia	ASV2613	32	3.62043e-05	0	0	32	0	0	0	0	0	0	0	0	0	0	0	0	0
d__Bacteria	k__norank_d__Bacteria	p__Proteobacteria	c__Gammaproteobacteria	o__Enterobacterales	f__Enterobacteriaceae	g__unclassified_f__Enterobacteriaceae	s__unclassified_f__Enterobacteriaceae	ASV1846	34	3.84671e-05	0	0	0	34	0	0	0	0	0	0	0	0	0	0	0	0
d__Bacteria	k__norank_d__Bacteria	p__Firmicutes	c__Bacilli	o__Lactobacillales	f__Carnobacteriaceae	g__Atopostipes	s__Atopostipes_sp.	ASV3699	38	4.29927e-05	0	38	0	0	0	0	0	0	0	0	0	0	0	0	0	0
d__Bacteria	k__norank_d__Bacteria	p__Bacteroidota	c__Bacteroidia	o__Bacteroidales	f__Tannerellaceae	g__Parabacteroides	s__unclassified_g__Parabacteroides	ASV393	32	3.62043e-05	0	0	0	0	21	0	0	0	0	0	0	8	0	0	0	3
d__Bacteria	k__norank_d__Bacteria	p__Proteobacteria	c__Alphaproteobacteria	o__Sphingomonadales	f__Sphingomonadaceae	g__Sphingomonas	s__unclassified_g__Sphingomonas	ASV1840	33	3.73357e-05	0	0	0	33	0	0	0	0	0	0	0	0	0	0	0	0
d__Bacteria	k__norank_d__Bacteria	p__Actinobacteriota	c__Thermoleophilia	o__Solirubrobacterales	f__Solirubrobacteraceae	g__norank_f__Solirubrobacteraceae	s__uncultured_Conexibacteraceae_bacterium_g__norank_f__Solirubrobacteraceae	ASV3700	38	4.29927e-05	0	38	0	0	0	0	0	0	0	0	0	0	0	0	0	0
d__Bacteria	k__norank_d__Bacteria	p__Proteobacteria	c__Alphaproteobacteria	o__Rhizobiales	f__Rhizobiaceae	g__Aureimonas	s__Aureimonas_ureilytica	ASV2609	34	3.84671e-05	0	0	34	0	0	0	0	0	0	0	0	0	0	0	0	0
d__Bacteria	k__norank_d__Bacteria	p__Acidobacteriota	c__Acidobacteriae	o__Solibacterales	f__Solibacteraceae	g__Candidatus_Solibacter	s__unclassified_g__Candidatus_Solibacter	ASV3695	34	3.84671e-05	0	34	0	0	0	0	0	0	0	0	0	0	0	0	0	0
d__Bacteria	k__norank_d__Bacteria	p__Firmicutes	c__Clostridia	o__Oscillospirales	f__Ruminococcaceae	g__Subdoligranulum	s__unclassified_g__Subdoligranulum	ASV19	30	3.39416e-05	0	0	0	0	0	0	0	0	0	0	0	0	0	30	0	0
d__Bacteria	k__norank_d__Bacteria	p__Proteobacteria	c__Alphaproteobacteria	o__Acetobacterales	f__Acetobacteraceae	g__Gluconobacter	s__unclassified_g__Gluconobacter	ASV2614	38	4.29927e-05	0	0	38	0	0	0	0	0	0	0	0	0	0	0	0	0
d__Bacteria	k__norank_d__Bacteria	p__Actinobacteriota	c__Acidimicrobiia	o__norank_c__Acidimicrobiia	f__norank_o__norank_c__Acidimicrobiia	g__norank_f__norank_o__norank_c__Acidimicrobiia	s__uncultured_forest_soil_bacterium_g__norank_f__norank_o__norank_c__Acidimicrobiia	ASV1842	37	4.18613e-05	0	0	0	37	0	0	0	0	0	0	0	0	0	0	0	0
d__Bacteria	k__norank_d__Bacteria	p__Acidobacteriota	c__Acidobacteriae	o__Subgroup_2	f__norank_o__Subgroup_2	g__norank_f__norank_o__Subgroup_2	s__unclassified_g__norank_f__norank_o__Subgroup_2	ASV2941	37	4.18613e-05	0	0	0	0	0	0	31	0	0	0	0	0	0	0	6	0
d__Bacteria	k__norank_d__Bacteria	p__Firmicutes	c__Bacilli	o__Lactobacillales	f__Streptococcaceae	g__Streptococcus	s__unclassified_g__Streptococcus	ASV371	36	4.07299e-05	0	0	0	0	33	0	0	0	3	0	0	0	0	0	0	0
d__Bacteria	k__norank_d__Bacteria	p__Proteobacteria	c__Alphaproteobacteria	o__Sphingomonadales	f__Sphingomonadaceae	g__Sphingomonas	s__unclassified_g__Sphingomonas	ASV2731	30	3.39416e-05	0	11	19	0	0	0	0	0	0	0	0	0	0	0	0	0
d__Bacteria	k__norank_d__Bacteria	p__Actinobacteriota	c__Thermoleophilia	o__Solirubrobacterales	f__67-14	g__norank_f__67-14	s__unclassified_g__norank_f__67-14	ASV1841	36	4.07299e-05	0	0	0	36	0	0	0	0	0	0	0	0	0	0	0	0
d__Bacteria	k__norank_d__Bacteria	p__Myxococcota	c__Polyangia	o__Haliangiales	f__Haliangiaceae	g__Haliangium	s__unclassified_g__Haliangium	ASV3698	35	3.95985e-05	0	35	0	0	0	0	0	0	0	0	0	0	0	0	0	0
d__Bacteria	k__norank_d__Bacteria	p__Acidobacteriota	c__Acidobacteriae	o__Bryobacterales	f__Bryobacteraceae	g__Bryobacter	s__unclassified_g__Bryobacter	ASV3697	36	4.07299e-05	0	36	0	0	0	0	0	0	0	0	0	0	0	0	0	0
d__Bacteria	k__norank_d__Bacteria	p__Bacteroidota	c__Bacteroidia	o__Chitinophagales	f__Saprospiraceae	g__OLB8	s__uncultured_Bacteroidetes_bacterium_g__OLB8	ASV2611	36	4.07299e-05	0	0	36	0	0	0	0	0	0	0	0	0	0	0	0	0
d__Bacteria	k__norank_d__Bacteria	p__Actinobacteriota	c__Thermoleophilia	o__Gaiellales	f__norank_o__Gaiellales	g__norank_f__norank_o__Gaiellales	s__unclassified_g__norank_f__norank_o__Gaiellales	ASV3691	36	4.07299e-05	0	36	0	0	0	0	0	0	0	0	0	0	0	0	0	0
d__Bacteria	k__norank_d__Bacteria	p__Firmicutes	c__Clostridia	o__Peptostreptococcales-Tissierellales	f__Peptostreptococcaceae	g__unclassified_f__Peptostreptococcaceae	s__unclassified_f__Peptostreptococcaceae	ASV3690	34	3.84671e-05	0	34	0	0	0	0	0	0	0	0	0	0	0	0	0	0
d__Bacteria	k__norank_d__Bacteria	p__Acidobacteriota	c__Acidobacteriae	o__Subgroup_2	f__norank_o__Subgroup_2	g__norank_f__norank_o__Subgroup_2	s__uncultured_Holophaga_sp._g__norank_f__norank_o__Subgroup_2	ASV3709	32	3.62043e-05	0	32	0	0	0	0	0	0	0	0	0	0	0	0	0	0
d__Bacteria	k__norank_d__Bacteria	p__Actinobacteriota	c__Actinobacteria	o__Micrococcales	f__Micrococcaceae	g__Micrococcus	s__unclassified_g__Micrococcus	ASV1873	33	3.73357e-05	0	0	0	29	0	0	0	0	0	0	4	0	0	0	0	0
d__Bacteria	k__norank_d__Bacteria	p__Firmicutes	c__Clostridia	o__Lachnospirales	f__Lachnospiraceae	g__Blautia	s__Blautia_sp._GD9	ASV1851	35	3.95985e-05	0	0	0	35	0	0	0	0	0	0	0	0	0	0	0	0
d__Bacteria	k__norank_d__Bacteria	p__Actinobacteriota	c__Actinobacteria	o__Frankiales	f__Acidothermaceae	g__Acidothermus	s__unclassified_g__Acidothermus	ASV3713	35	3.95985e-05	0	35	0	0	0	0	0	0	0	0	0	0	0	0	0	0
d__Bacteria	k__norank_d__Bacteria	p__Proteobacteria	c__Alphaproteobacteria	o__Elsterales	f__norank_o__Elsterales	g__norank_f__norank_o__Elsterales	s__unclassified_g__norank_f__norank_o__Elsterales	ASV3714	36	4.07299e-05	0	36	0	0	0	0	0	0	0	0	0	0	0	0	0	0
d__Bacteria	k__norank_d__Bacteria	p__Proteobacteria	c__Alphaproteobacteria	o__Caulobacterales	f__Hyphomonadaceae	g__SWB02	s__unclassified_g__SWB02	ASV1878	33	3.73357e-05	0	0	0	28	0	0	0	0	0	0	0	0	0	0	5	0
d__Bacteria	k__norank_d__Bacteria	p__Proteobacteria	c__Alphaproteobacteria	o__Tistrellales	f__Geminicoccaceae	g__Candidatus_Alysiosphaera	s__uncultured_bacterium_g__Candidatus_Alysiosphaera	ASV2615	32	3.62043e-05	0	0	32	0	0	0	0	0	0	0	0	0	0	0	0	0
d__Bacteria	k__norank_d__Bacteria	p__Actinobacteriota	c__Actinobacteria	o__Micrococcales	f__Microbacteriaceae	g__Curtobacterium	s__unclassified_g__Curtobacterium	ASV1854	32	3.62043e-05	0	0	0	32	0	0	0	0	0	0	0	0	0	0	0	0
d__Bacteria	k__norank_d__Bacteria	p__Proteobacteria	c__Gammaproteobacteria	o__Pseudomonadales	f__Pseudomonadaceae	g__unclassified_f__Pseudomonadaceae	s__unclassified_f__Pseudomonadaceae	ASV2193	29	3.28102e-05	29	0	0	0	0	0	0	0	0	0	0	0	0	0	0	0
d__Bacteria	k__norank_d__Bacteria	p__Proteobacteria	c__Gammaproteobacteria	o__Burkholderiales	f__Rhodocyclaceae	g__Zoogloea	s__unclassified_g__Zoogloea	ASV2617	35	3.95985e-05	0	0	35	0	0	0	0	0	0	0	0	0	0	0	0	0
d__Bacteria	k__norank_d__Bacteria	p__Bdellovibrionota	c__Oligoflexia	o__0319-6G20	f__norank_o__0319-6G20	g__norank_f__norank_o__0319-6G20	s__unclassified_g__norank_f__norank_o__0319-6G20	ASV3710	37	4.18613e-05	0	37	0	0	0	0	0	0	0	0	0	0	0	0	0	0
d__Bacteria	k__norank_d__Bacteria	p__Acidobacteriota	c__Acidobacteriae	o__Subgroup_2	f__norank_o__Subgroup_2	g__norank_f__norank_o__Subgroup_2	s__unclassified_g__norank_f__norank_o__Subgroup_2	ASV3701	36	4.07299e-05	0	36	0	0	0	0	0	0	0	0	0	0	0	0	0	0
d__Bacteria	k__norank_d__Bacteria	p__Firmicutes	c__Clostridia	o__Oscillospirales	f__Ruminococcaceae	g__Faecalibacterium	s__unclassified_g__Faecalibacterium	ASV437	33	3.73357e-05	0	0	0	0	13	0	0	0	0	0	0	0	0	0	20	0
d__Bacteria	k__norank_d__Bacteria	p__RCP2-54	c__norank_p__RCP2-54	o__norank_c__norank_p__RCP2-54	f__norank_o__norank_c__norank_p__RCP2-54	g__norank_f__norank_o__norank_c__norank_p__RCP2-54	s__uncultured_bacterium_g__norank_f__norank_o__norank_c__norank_p__RCP2-54	ASV3705	32	3.62043e-05	0	32	0	0	0	0	0	0	0	0	0	0	0	0	0	0
d__Bacteria	k__norank_d__Bacteria	p__Proteobacteria	c__Alphaproteobacteria	o__Rhizobiales	f__Xanthobacteraceae	g__norank_f__Xanthobacteraceae	s__unclassified_g__norank_f__Xanthobacteraceae	ASV3703	34	3.84671e-05	0	34	0	0	0	0	0	0	0	0	0	0	0	0	0	0
d__Bacteria	k__norank_d__Bacteria	p__Acidobacteriota	c__Acidobacteriae	o__Acidobacteriales	f__norank_o__Acidobacteriales	g__norank_f__norank_o__Acidobacteriales	s__uncultured_Acidobacteriaceae_bacterium_g__norank_f__norank	ASV3704	33	3.73357e-05	0	33	0	0	0	0	0	0	0	0	0	0	0	0	0	0
d__Bacteria	k__norank_d__Bacteria	p__Acidobacteriota	c__Acidobacteriae	o__Subgroup_2	f__norank_o__Subgroup_2	g__norank_f__norank_o__Subgroup_2	s__unclassified_g__norank_f__norank_o__Subgroup_2	ASV278	33	3.73357e-05	0	0	0	0	0	0	0	26	1	0	4	0	0	2	0	0
d__Bacteria	k__norank_d__Bacteria	p__Acidobacteriota	c__Acidobacteriae	o__Acidobacteriales	f__Acidobacteriaceae_Subgroup_1	g__unclassified_f__Acidobacteriaceae_Subgroup_1	s__unclassified_f__Acidobacteriaceae_Subgroup_1	ASV3716	33	3.73357e-05	0	33	0	0	0	0	0	0	0	0	0	0	0	0	0	0
d__Bacteria	k__norank_d__Bacteria	p__Acidobacteriota	c__Acidobacteriae	o__Solibacterales	f__Solibacteraceae	g__Candidatus_Solibacter	s__unclassified_g__Candidatus_Solibacter	ASV3707	34	3.84671e-05	0	34	0	0	0	0	0	0	0	0	0	0	0	0	0	0
d__Bacteria	k__norank_d__Bacteria	p__Chloroflexi	c__Ktedonobacteria	o__Ktedonobacterales	f__Ktedonobacteraceae	g__FCPS473	s__uncultured_Thermosporotrichaceae_bacterium_g__FCPS473	ASV3717	34	3.84671e-05	0	34	0	0	0	0	0	0	0	0	0	0	0	0	0	0
d__Bacteria	k__norank_d__Bacteria	p__Proteobacteria	c__Alphaproteobacteria	o__Elsterales	f__norank_o__Elsterales	g__norank_f__norank_o__Elsterales	s__unclassified_g__norank_f__norank_o__Elsterales	ASV3715	34	3.84671e-05	0	34	0	0	0	0	0	0	0	0	0	0	0	0	0	0
d__Bacteria	k__norank_d__Bacteria	p__Actinobacteriota	c__Actinobacteria	o__Micrococcales	f__Micrococcaceae	g__Micrococcus	s__unclassified_g__Micrococcus	ASV1852	36	4.07299e-05	0	0	0	36	0	0	0	0	0	0	0	0	0	0	0	0
d__Bacteria	k__norank_d__Bacteria	p__Chloroflexi	c__Ktedonobacteria	o__Ktedonobacterales	f__Ktedonobacteraceae	g__unclassified_f__Ktedonobacteraceae	s__unclassified_f__Ktedonobacteraceae	ASV3712	33	3.73357e-05	0	33	0	0	0	0	0	0	0	0	0	0	0	0	0	0
d__Bacteria	k__norank_d__Bacteria	p__Proteobacteria	c__Alphaproteobacteria	o__Sphingomonadales	f__Sphingomonadaceae	g__Sphingomonas	s__unclassified_g__Sphingomonas	ASV2194	35	3.95985e-05	35	0	0	0	0	0	0	0	0	0	0	0	0	0	0	0
d__Bacteria	k__norank_d__Bacteria	p__Actinobacteriota	c__Actinobacteria	o__Propionibacteriales	f__Nocardioidaceae	g__Marmoricola	s__unclassified_g__Marmoricola	ASV2994	31	3.5073e-05	0	11	0	0	0	0	13	5	0	0	0	2	0	0	0	0
d__Bacteria	k__norank_d__Bacteria	p__Proteobacteria	c__Alphaproteobacteria	o__Rhizobiales	f__Rhizobiaceae	g__Pseudochrobactrum	s__unclassified_g__Pseudochrobactrum	ASV1362	36	4.07299e-05	15	0	5	0	0	5	8	0	0	0	0	0	0	0	0	3
d__Bacteria	k__norank_d__Bacteria	p__Actinobacteriota	c__Acidimicrobiia	o__unclassified_c__Acidimicrobiia	f__unclassified_c__Acidimicrobiia	g__unclassified_c__Acidimicrobiia	s__unclassified_c__Acidimicrobiia	ASV3706	36	4.07299e-05	0	36	0	0	0	0	0	0	0	0	0	0	0	0	0	0
d__Bacteria	k__norank_d__Bacteria	p__Actinobacteriota	c__Thermoleophilia	o__Gaiellales	f__Gaiellaceae	g__Gaiella	s__uncultured_Acidimicrobiia_bacterium_g__Gaiella	ASV1850	34	3.84671e-05	0	0	0	34	0	0	0	0	0	0	0	0	0	0	0	0
d__Bacteria	k__norank_d__Bacteria	p__Chloroflexi	c__Ktedonobacteria	o__Ktedonobacterales	f__Ktedonobacteraceae	g__FCPS473	s__uncultured_Thermosporotrichaceae_bacterium_g__FCPS473	ASV3708	35	3.95985e-05	0	35	0	0	0	0	0	0	0	0	0	0	0	0	0	0
d__Bacteria	k__norank_d__Bacteria	p__Bdellovibrionota	c__Oligoflexia	o__0319-6G20	f__norank_o__0319-6G20	g__norank_f__norank_o__0319-6G20	s__unclassified_g__norank_f__norank_o__0319-6G20	ASV3702	35	3.95985e-05	0	35	0	0	0	0	0	0	0	0	0	0	0	0	0	0
d__Bacteria	k__norank_d__Bacteria	p__Chloroflexi	c__Ktedonobacteria	o__Ktedonobacterales	f__JG30-KF-AS9	g__norank_f__JG30-KF-AS9	s__unclassified_g__norank_f__JG30-KF-AS9	ASV3711	32	3.62043e-05	0	32	0	0	0	0	0	0	0	0	0	0	0	0	0	0
d__Bacteria	k__norank_d__Bacteria	p__Actinobacteriota	c__Thermoleophilia	o__Solirubrobacterales	f__Solirubrobacteraceae	g__Conexibacter	s__unclassified_g__Conexibacter	ASV2623	30	3.39416e-05	0	0	30	0	0	0	0	0	0	0	0	0	0	0	0	0
d__Bacteria	k__norank_d__Bacteria	p__Chloroflexi	c__Ktedonobacteria	o__Ktedonobacterales	f__JG30-KF-AS9	g__norank_f__JG30-KF-AS9	s__uncultured_bacterium_g__norank_f__JG30-KF-AS9	ASV3723	34	3.84671e-05	0	34	0	0	0	0	0	0	0	0	0	0	0	0	0	0
d__Bacteria	k__norank_d__Bacteria	p__Proteobacteria	c__Gammaproteobacteria	o__Burkholderiales	f__Comamonadaceae	g__unclassified_f__Comamonadaceae	s__unclassified_f__Comamonadaceae	ASV1857	32	3.62043e-05	0	0	0	32	0	0	0	0	0	0	0	0	0	0	0	0
d__Bacteria	k__norank_d__Bacteria	p__Firmicutes	c__Clostridia	o__Peptostreptococcales-Tissierellales	f__Anaerovoracaceae	g__Anaerovorax	s__Firmicutes_bacterium_LC_13R	ASV2622	31	3.5073e-05	0	0	31	0	0	0	0	0	0	0	0	0	0	0	0	0
d__Bacteria	k__norank_d__Bacteria	p__Bacteroidota	c__Bacteroidia	o__Bacteroidales	f__M2PB4-65_termite_group	g__norank_f__M2PB4-65_termite_group	s__metagenome_g__norank_f__M2PB4-65_termite_group	ASV2626	35	3.95985e-05	0	0	35	0	0	0	0	0	0	0	0	0	0	0	0	0
d__Bacteria	k__norank_d__Bacteria	p__Actinobacteriota	c__Actinobacteria	o__Propionibacteriales	f__Propionibacteriaceae	g__Tessaracoccus	s__unclassified_g__Tessaracoccus	ASV1858	33	3.73357e-05	0	0	0	33	0	0	0	0	0	0	0	0	0	0	0	0
d__Bacteria	k__norank_d__Bacteria	p__Acidobacteriota	c__Acidobacteriae	o__Subgroup_2	f__norank_o__Subgroup_2	g__norank_f__norank_o__Subgroup_2	s__uncultured_Holophaga_sp._g__norank_f__norank_o__Subgroup_2	ASV3724	36	4.07299e-05	0	36	0	0	0	0	0	0	0	0	0	0	0	0	0	0
d__Bacteria	k__norank_d__Bacteria	p__Actinobacteriota	c__Acidimicrobiia	o__IMCC26256	f__norank_o__IMCC26256	g__norank_f__norank_o__IMCC26256	s__unclassified_g__norank_f__norank_o__IMCC26256	ASV3726	35	3.95985e-05	0	35	0	0	0	0	0	0	0	0	0	0	0	0	0	0
d__Bacteria	k__norank_d__Bacteria	p__Bacteroidota	c__Bacteroidia	o__Bacteroidales	f__Prevotellaceae	g__unclassified_f__Prevotellaceae	s__unclassified_f__Prevotellaceae	ASV4744	32	3.62043e-05	0	0	0	0	0	0	0	32	0	0	0	0	0	0	0	0
d__Bacteria	k__norank_d__Bacteria	p__Bacteroidota	c__Bacteroidia	o__Sphingobacteriales	f__Lentimicrobiaceae	g__Lentimicrobium	s__metagenome_g__Lentimicrobium	ASV2625	29	3.28102e-05	0	0	29	0	0	0	0	0	0	0	0	0	0	0	0	0
d__Bacteria	k__norank_d__Bacteria	p__Proteobacteria	c__Gammaproteobacteria	o__Competibacterales	f__Competibacteraceae	g__Candidatus_Competibacter	s__unclassified_g__Candidatus_Competibacter	ASV218	32	3.62043e-05	0	0	0	0	0	0	0	10	0	0	0	19	0	3	0	0
d__Bacteria	k__norank_d__Bacteria	p__Bacteroidota	c__Bacteroidia	o__Bacteroidales	f__unclassified_o__Bacteroidales	g__unclassified_o__Bacteroidales	s__unclassified_o__Bacteroidales	ASV2627	30	3.39416e-05	0	0	30	0	0	0	0	0	0	0	0	0	0	0	0	0
d__Bacteria	k__norank_d__Bacteria	p__Proteobacteria	c__Gammaproteobacteria	o__Burkholderiales	f__Rhodocyclaceae	g__Zoogloea	s__unclassified_g__Zoogloea	ASV2620	31	3.5073e-05	0	0	31	0	0	0	0	0	0	0	0	0	0	0	0	0
d__Bacteria	k__norank_d__Bacteria	p__Firmicutes	c__Clostridia	o__Peptostreptococcales-Tissierellales	f__norank_o__Peptostreptococcales-Tissierellales	g__Anaerococcus	s__unclassified_g__Anaerococcus	ASV4768	31	3.5073e-05	0	0	0	0	0	0	0	19	0	0	0	0	5	0	7	0
d__Bacteria	k__norank_d__Bacteria	p__Actinobacteriota	c__Acidimicrobiia	o__Acidimicrobiales	f__Acidimicrobiaceae	g__norank_f__Acidimicrobiaceae	s__uncultured_bacterium_g__norank_f__Acidimicrobiaceae	ASV3722	33	3.73357e-05	0	33	0	0	0	0	0	0	0	0	0	0	0	0	0	0
d__Bacteria	k__norank_d__Bacteria	p__Bacteroidota	c__Bacteroidia	o__Bacteroidales	f__Marinilabiliaceae	g__Cytophaga_xylanolytica_group	s__Cytophaga_xylanolytica	ASV1929	35	3.95985e-05	0	0	0	24	0	0	9	0	2	0	0	0	0	0	0	0
d__Bacteria	k__norank_d__Bacteria	p__Desulfobacterota	c__Desulfuromonadia	o__PB19	f__norank_o__PB19	g__norank_f__norank_o__PB19	s__metagenome_g__norank_f__norank_o__PB19	ASV2624	31	3.5073e-05	0	0	31	0	0	0	0	0	0	0	0	0	0	0	0	0
d__Bacteria	k__norank_d__Bacteria	p__Actinobacteriota	c__Acidimicrobiia	o__Microtrichales	f__Microtrichaceae	g__norank_f__Microtrichaceae	s__unclassified_g__norank_f__Microtrichaceae	ASV2654	33	3.73357e-05	0	0	30	0	0	0	0	3	0	0	0	0	0	0	0	0
d__Bacteria	k__norank_d__Bacteria	p__Proteobacteria	c__Gammaproteobacteria	o__Gammaproteobacteria_Incertae_Sedis	f__unclassified_o__Gammaproteobacteria_Incertae_Sedis	g__Acidibacter	s__unclassified_g__Acidibacter	ASV3721	35	3.95985e-05	0	35	0	0	0	0	0	0	0	0	0	0	0	0	0	0
d__Bacteria	k__norank_d__Bacteria	p__Proteobacteria	c__Gammaproteobacteria	o__Burkholderiales	f__Rhodocyclaceae	g__Candidatus_Accumulibacter	s__unclassified_g__Candidatus_Accumulibacter	ASV2619	27	3.05474e-05	0	0	27	0	0	0	0	0	0	0	0	0	0	0	0	0
d__Bacteria	k__norank_d__Bacteria	p__Proteobacteria	c__Gammaproteobacteria	o__Xanthomonadales	f__Rhodanobacteraceae	g__Rhodanobacter	s__unclassified_g__Rhodanobacter	ASV3719	33	3.73357e-05	0	33	0	0	0	0	0	0	0	0	0	0	0	0	0	0
d__Bacteria	k__norank_d__Bacteria	p__Actinobacteriota	c__Acidimicrobiia	o__IMCC26256	f__norank_o__IMCC26256	g__norank_f__norank_o__IMCC26256	s__unclassified_g__norank_f__norank_o__IMCC26256	ASV3727	33	3.73357e-05	0	33	0	0	0	0	0	0	0	0	0	0	0	0	0	0
d__Bacteria	k__norank_d__Bacteria	p__Proteobacteria	c__Gammaproteobacteria	o__Burkholderiales	f__Burkholderiaceae	g__Burkholderia-Caballeronia-Paraburkholderia	s__unclassified_g__Burkholderia-Caballeronia-Paraburkholderia	ASV2618	32	3.62043e-05	0	0	32	0	0	0	0	0	0	0	0	0	0	0	0	0
d__Bacteria	k__norank_d__Bacteria	p__Bacteroidota	c__Bacteroidia	o__Bacteroidales	f__Prevotellaceae	g__Prevotella	s__unclassified_g__Prevotella	ASV2936	34	3.84671e-05	0	0	0	0	0	0	34	0	0	0	0	0	0	0	0	0
d__Bacteria	k__norank_d__Bacteria	p__Proteobacteria	c__Gammaproteobacteria	o__Burkholderiales	f__Oxalobacteraceae	g__unclassified_f__Oxalobacteraceae	s__unclassified_f__Oxalobacteraceae	ASV1422	36	4.07299e-05	0	32	0	0	0	4	0	0	0	0	0	0	0	0	0	0
d__Bacteria	k__norank_d__Bacteria	p__Proteobacteria	c__Alphaproteobacteria	o__Rhizobiales	f__Xanthobacteraceae	g__unclassified_f__Xanthobacteraceae	s__unclassified_f__Xanthobacteraceae	ASV3725	31	3.5073e-05	0	31	0	0	0	0	0	0	0	0	0	0	0	0	0	0
d__Bacteria	k__norank_d__Bacteria	p__Proteobacteria	c__Gammaproteobacteria	o__Enterobacterales	f__Enterobacteriaceae	g__unclassified_f__Enterobacteriaceae	s__unclassified_f__Enterobacteriaceae	ASV2195	27	3.05474e-05	27	0	0	0	0	0	0	0	0	0	0	0	0	0	0	0
d__Bacteria	k__norank_d__Bacteria	p__Bacteroidota	c__Bacteroidia	o__Bacteroidales	f__Prevotellaceae	g__Prevotella	s__Prevotella_stercorea	ASV3012	31	3.5073e-05	0	0	0	0	0	0	12	19	0	0	0	0	0	0	0	0
d__Bacteria	k__norank_d__Bacteria	p__Acidobacteriota	c__Acidobacteriae	o__Acidobacteriales	f__norank_o__Acidobacteriales	g__norank_f__norank_o__Acidobacteriales	s__unclassified_g__norank_f__norank_o__Acidobacteriales	ASV3718	31	3.5073e-05	0	31	0	0	0	0	0	0	0	0	0	0	0	0	0	0
d__Bacteria	k__norank_d__Bacteria	p__Proteobacteria	c__Gammaproteobacteria	o__Xanthomonadales	f__Xanthomonadaceae	g__Lysobacter	s__unclassified_g__Lysobacter	ASV4745	32	3.62043e-05	0	0	0	0	0	0	0	32	0	0	0	0	0	0	0	0
d__Bacteria	k__norank_d__Bacteria	p__Proteobacteria	c__Gammaproteobacteria	o__Burkholderiales	f__Alcaligenaceae	g__unclassified_f__Alcaligenaceae	s__unclassified_f__Alcaligenaceae	ASV4746	34	3.84671e-05	0	0	0	0	0	0	0	34	0	0	0	0	0	0	0	0
d__Bacteria	k__norank_d__Bacteria	p__Proteobacteria	c__Alphaproteobacteria	o__Defluviicoccales	f__Defluviicoccaceae	g__Defluviicoccus	s__unclassified_g__Defluviicoccus	ASV2621	32	3.62043e-05	0	0	32	0	0	0	0	0	0	0	0	0	0	0	0	0
d__Bacteria	k__norank_d__Bacteria	p__Actinobacteriota	c__Actinobacteria	o__Corynebacteriales	f__Nocardiaceae	g__Nocardia	s__unclassified_g__Nocardia	ASV3720	34	3.84671e-05	0	34	0	0	0	0	0	0	0	0	0	0	0	0	0	0
d__Bacteria	k__norank_d__Bacteria	p__Acidobacteriota	c__Acidobacteriae	o__Solibacterales	f__Solibacteraceae	g__Candidatus_Solibacter	s__unclassified_g__Candidatus_Solibacter	ASV3731	34	3.84671e-05	0	34	0	0	0	0	0	0	0	0	0	0	0	0	0	0
d__Bacteria	k__norank_d__Bacteria	p__Actinobacteriota	c__Actinobacteria	o__Propionibacteriales	f__Nocardioidaceae	g__Nocardioides	s__unclassified_g__Nocardioides	ASV221	33	3.73357e-05	0	23	0	0	0	0	0	7	0	0	0	0	0	3	0	0
d__Bacteria	k__norank_d__Bacteria	p__Actinobacteriota	c__Actinobacteria	o__Kineosporiales	f__Kineosporiaceae	g__unclassified_f__Kineosporiaceae	s__unclassified_f__Kineosporiaceae	ASV2633	31	3.5073e-05	0	0	31	0	0	0	0	0	0	0	0	0	0	0	0	0
d__Bacteria	k__norank_d__Bacteria	p__Firmicutes	c__Bacilli	o__Staphylococcales	f__Staphylococcaceae	g__Staphylococcus	s__unclassified_g__Staphylococcus	ASV461	30	3.39416e-05	0	0	0	0	11	19	0	0	0	0	0	0	0	0	0	0
d__Bacteria	k__norank_d__Bacteria	p__Verrucomicrobiota	c__Verrucomicrobiae	o__Pedosphaerales	f__Pedosphaeraceae	g__unclassified_f__Pedosphaeraceae	s__unclassified_f__Pedosphaeraceae	ASV3739	33	3.73357e-05	0	33	0	0	0	0	0	0	0	0	0	0	0	0	0	0
d__Bacteria	k__norank_d__Bacteria	p__Proteobacteria	c__Alphaproteobacteria	o__Tistrellales	f__Geminicoccaceae	g__norank_f__Geminicoccaceae	s__uncultured_bacterium_g__norank_f__Geminicoccaceae	ASV1859	34	3.84671e-05	0	0	0	34	0	0	0	0	0	0	0	0	0	0	0	0
d__Bacteria	k__norank_d__Bacteria	p__Bacteroidota	c__Bacteroidia	o__Bacteroidales	f__Barnesiellaceae	g__Barnesiella	s__uncultured_organism_g__Barnesiella	ASV468	31	3.5073e-05	0	0	0	0	11	0	0	20	0	0	0	0	0	0	0	0
d__Bacteria	k__norank_d__Bacteria	p__Firmicutes	c__Clostridia	o__Lachnospirales	f__Lachnospiraceae	g__Coprococcus	s__uncultured_organism_g__Coprococcus	ASV392	28	3.16788e-05	0	0	0	0	21	7	0	0	0	0	0	0	0	0	0	0
d__Bacteria	k__norank_d__Bacteria	p__Chloroflexi	c__AD3	o__norank_c__AD3	f__norank_o__norank_c__AD3	g__norank_f__norank_o__norank_c__AD3	s__uncultured_soil_bacterium_g__norank_f__norank_o__norank_c__AD3	ASV3728	32	3.62043e-05	0	32	0	0	0	0	0	0	0	0	0	0	0	0	0	0
d__Bacteria	k__norank_d__Bacteria	p__Actinobacteriota	c__Rubrobacteria	o__Rubrobacterales	f__Rubrobacteriaceae	g__Rubrobacter	s__unclassified_g__Rubrobacter	ASV2795	30	3.39416e-05	0	0	18	0	0	0	7	2	0	0	0	0	3	0	0	0
d__Bacteria	k__norank_d__Bacteria	p__Firmicutes	c__Clostridia	o__Lachnospirales	f__Lachnospiraceae	g__Lachnoclostridium	s__unclassified_g__Lachnoclostridium	ASV431	27	3.05474e-05	0	0	0	0	14	9	0	0	4	0	0	0	0	0	0	0
d__Bacteria	k__norank_d__Bacteria	p__Proteobacteria	c__Alphaproteobacteria	o__Rhizobiales	f__Beijerinckiaceae	g__Methylobacterium-Methylorubrum	s__Methylobacterium_platani	ASV3741	32	3.62043e-05	0	32	0	0	0	0	0	0	0	0	0	0	0	0	0	0
d__Bacteria	k__norank_d__Bacteria	p__Acidobacteriota	c__Acidobacteriae	o__Bryobacterales	f__Bryobacteraceae	g__Bryobacter	s__unclassified_g__Bryobacter	ASV2630	31	3.5073e-05	0	0	31	0	0	0	0	0	0	0	0	0	0	0	0	0
d__Bacteria	k__norank_d__Bacteria	p__Firmicutes	c__Bacilli	o__Paenibacillales	f__Paenibacillaceae	g__Paenibacillus	s__unclassified_g__Paenibacillus	ASV3736	30	3.39416e-05	0	30	0	0	0	0	0	0	0	0	0	0	0	0	0	0
d__Bacteria	k__norank_d__Bacteria	p__Proteobacteria	c__Alphaproteobacteria	o__Rhizobiales	f__Rhizobiaceae	g__Allorhizobium-Neorhizobium-Pararhizobium-Rhizobium	s__unclassified_g__Allorhizobium-Neorhizobium-Pararhizobium-Rhizobium	ASV1965	32	3.62043e-05	0	0	17	15	0	0	0	0	0	0	0	0	0	0	0	0
d__Bacteria	k__norank_d__Bacteria	p__Actinobacteriota	c__Actinobacteria	o__Corynebacteriales	f__Mycobacteriaceae	g__Mycobacterium	s__unclassified_g__Mycobacterium	ASV2631	32	3.62043e-05	0	0	32	0	0	0	0	0	0	0	0	0	0	0	0	0
d__Bacteria	k__norank_d__Bacteria	p__Bacteroidota	c__Bacteroidia	o__Bacteroidales	f__Prevotellaceae	g__Prevotella	s__Prevotellaceae_bacterium	ASV2632	32	3.62043e-05	0	0	32	0	0	0	0	0	0	0	0	0	0	0	0	0
d__Bacteria	k__norank_d__Bacteria	p__Desulfobacterota	c__Desulfobulbia	o__Desulfobulbales	f__Desulfocapsaceae	g__unclassified_f__Desulfocapsaceae	s__unclassified_f__Desulfocapsaceae	ASV1860	34	3.84671e-05	0	0	0	34	0	0	0	0	0	0	0	0	0	0	0	0
d__Bacteria	k__norank_d__Bacteria	p__Actinobacteriota	c__Acidimicrobiia	o__norank_c__Acidimicrobiia	f__norank_o__norank_c__Acidimicrobiia	g__norank_f__norank_o__norank_c__Acidimicrobiia	s__unclassified_g__norank_f__norank_o__norank_c__Acidimicrobiia	ASV3732	34	3.84671e-05	0	34	0	0	0	0	0	0	0	0	0	0	0	0	0	0
d__Bacteria	k__norank_d__Bacteria	p__Actinobacteriota	c__Actinobacteria	o__Micrococcales	f__Cellulomonadaceae	g__unclassified_f__Cellulomonadaceae	s__unclassified_f__Cellulomonadaceae	ASV2629	29	3.28102e-05	0	0	29	0	0	0	0	0	0	0	0	0	0	0	0	0
d__Bacteria	k__norank_d__Bacteria	p__Proteobacteria	c__Alphaproteobacteria	o__Rhizobiales	f__Xanthobacteraceae	g__norank_f__Xanthobacteraceae	s__unclassified_g__norank_f__Xanthobacteraceae	ASV3730	32	3.62043e-05	0	32	0	0	0	0	0	0	0	0	0	0	0	0	0	0
d__Bacteria	k__norank_d__Bacteria	p__Proteobacteria	c__Alphaproteobacteria	o__Rickettsiales	f__Mitochondria	g__norank_f__Mitochondria	s__Phyllostachys_praecox	ASV2638	32	3.62043e-05	0	0	32	0	0	0	0	0	0	0	0	0	0	0	0	0
d__Bacteria	k__norank_d__Bacteria	p__Acidobacteriota	c__Acidobacteriae	o__Bryobacterales	f__Bryobacteraceae	g__Bryobacter	s__unclassified_g__Bryobacter	ASV3735	35	3.95985e-05	0	35	0	0	0	0	0	0	0	0	0	0	0	0	0	0
d__Bacteria	k__norank_d__Bacteria	p__Bacteroidota	c__Bacteroidia	o__Bacteroidales	f__Bacteroidaceae	g__Bacteroides	s__unclassified_g__Bacteroides	ASV2937	31	3.5073e-05	0	0	0	0	0	0	31	0	0	0	0	0	0	0	0	0
d__Bacteria	k__norank_d__Bacteria	p__Firmicutes	c__Clostridia	o__Peptostreptococcales-Tissierellales	f__Peptostreptococcaceae	g__Romboutsia	s__unclassified_g__Romboutsia	ASV479	27	3.05474e-05	0	0	0	0	8	0	0	19	0	0	0	0	0	0	0	0
d__Bacteria	k__norank_d__Bacteria	p__Proteobacteria	c__Gammaproteobacteria	o__Burkholderiales	f__Aquaspirillaceae	g__Rivicola	s__unclassified_g__Rivicola	ASV1863	35	3.95985e-05	0	0	0	35	0	0	0	0	0	0	0	0	0	0	0	0
d__Bacteria	k__norank_d__Bacteria	p__Actinobacteriota	c__Actinobacteria	o__Propionibacteriales	f__Nocardioidaceae	g__Nocardioides	s__unclassified_g__Nocardioides	ASV647	30	3.39416e-05	0	0	0	0	5	7	15	0	0	0	3	0	0	0	0	0
d__Bacteria	k__norank_d__Bacteria	p__Actinobacteriota	c__Actinobacteria	o__Micrococcales	f__unclassified_o__Micrococcales	g__unclassified_o__Micrococcales	s__unclassified_o__Micrococcales	ASV4747	32	3.62043e-05	0	0	0	0	0	0	0	32	0	0	0	0	0	0	0	0
d__Bacteria	k__norank_d__Bacteria	p__Proteobacteria	c__Alphaproteobacteria	o__Elsterales	f__norank_o__Elsterales	g__norank_f__norank_o__Elsterales	s__unclassified_g__norank_f__norank_o__Elsterales	ASV3740	29	3.28102e-05	0	29	0	0	0	0	0	0	0	0	0	0	0	0	0	0
d__Bacteria	k__norank_d__Bacteria	p__Actinobacteriota	c__Thermoleophilia	o__Solirubrobacterales	f__Solirubrobacteraceae	g__Solirubrobacter	s__unclassified_g__Solirubrobacter	ASV1079	34	3.84671e-05	0	0	0	0	0	14	20	0	0	0	0	0	0	0	0	0
d__Bacteria	k__norank_d__Bacteria	p__Proteobacteria	c__Alphaproteobacteria	o__Acetobacterales	f__Acetobacteraceae	g__unclassified_f__Acetobacteraceae	s__unclassified_f__Acetobacteraceae	ASV3737	34	3.84671e-05	0	34	0	0	0	0	0	0	0	0	0	0	0	0	0	0
d__Bacteria	k__norank_d__Bacteria	p__Chloroflexi	c__Ktedonobacteria	o__Ktedonobacterales	f__JG30-KF-AS9	g__norank_f__JG30-KF-AS9	s__uncultured_bacterium_g__norank_f__JG30-KF-AS9	ASV3734	32	3.62043e-05	0	32	0	0	0	0	0	0	0	0	0	0	0	0	0	0
d__Bacteria	k__norank_d__Bacteria	p__Bacteroidota	c__Bacteroidia	o__Chitinophagales	f__unclassified_o__Chitinophagales	g__unclassified_o__Chitinophagales	s__unclassified_o__Chitinophagales	ASV2628	31	3.5073e-05	0	0	31	0	0	0	0	0	0	0	0	0	0	0	0	0
d__Bacteria	k__norank_d__Bacteria	p__Chloroflexi	c__AD3	o__norank_c__AD3	f__norank_o__norank_c__AD3	g__norank_f__norank_o__norank_c__AD3	s__uncultured_bacterium_g__norank_f__norank_o__norank_c__AD3	ASV101	31	3.5073e-05	0	0	0	0	0	0	0	12	0	0	0	13	0	6	0	0
d__Bacteria	k__norank_d__Bacteria	p__Chloroflexi	c__Ktedonobacteria	o__Ktedonobacterales	f__Ktedonobacteraceae	g__norank_f__Ktedonobacteraceae	s__unclassified_g__norank_f__Ktedonobacteraceae	ASV3733	34	3.84671e-05	0	34	0	0	0	0	0	0	0	0	0	0	0	0	0	0
d__Bacteria	k__norank_d__Bacteria	p__Firmicutes	c__Bacilli	o__Lactobacillales	f__Carnobacteriaceae	g__Granulicatella	s__unclassified_g__Granulicatella	ASV1034	32	3.62043e-05	0	0	0	0	0	32	0	0	0	0	0	0	0	0	0	0
d__Bacteria	k__norank_d__Bacteria	p__Firmicutes	c__Bacilli	o__Bacillales	f__Bacillaceae	g__Geobacillus	s__unclassified_g__Geobacillus	ASV2637	32	3.62043e-05	0	0	32	0	0	0	0	0	0	0	0	0	0	0	0	0
d__Bacteria	k__norank_d__Bacteria	p__Bacteroidota	c__Bacteroidia	o__Bacteroidales	f__Bacteroidaceae	g__Bacteroides	s__unclassified_g__Bacteroides	ASV3298	33	3.73357e-05	0	0	0	0	0	0	0	0	0	9	0	24	0	0	0	0
d__Bacteria	k__norank_d__Bacteria	p__Bacteroidota	c__Bacteroidia	o__Bacteroidales	f__unclassified_o__Bacteroidales	g__unclassified_o__Bacteroidales	s__unclassified_o__Bacteroidales	ASV2634	28	3.16788e-05	0	0	28	0	0	0	0	0	0	0	0	0	0	0	0	0
d__Bacteria	k__norank_d__Bacteria	p__Firmicutes	c__Bacilli	o__Bacillales	f__Bacillaceae	g__unclassified_f__Bacillaceae	s__unclassified_f__Bacillaceae	ASV4748	29	3.28102e-05	0	0	0	0	0	0	0	29	0	0	0	0	0	0	0	0
d__Bacteria	k__norank_d__Bacteria	p__Firmicutes	c__Clostridia	o__Lachnospirales	f__Lachnospiraceae	g__Ruminococcus_torques_group	s__unclassified_g__Ruminococcus_torques_group	ASV438	32	3.62043e-05	0	0	0	0	14	0	18	0	0	0	0	0	0	0	0	0
d__Bacteria	k__norank_d__Bacteria	p__Acidobacteriota	c__Acidobacteriae	o__Solibacterales	f__Solibacteraceae	g__Candidatus_Solibacter	s__unclassified_g__Candidatus_Solibacter	ASV3738	34	3.84671e-05	0	34	0	0	0	0	0	0	0	0	0	0	0	0	0	0
d__Bacteria	k__norank_d__Bacteria	p__Acidobacteriota	c__Acidobacteriae	o__Subgroup_2	f__norank_o__Subgroup_2	g__norank_f__norank_o__Subgroup_2	s__uncultured_Acidobacteria_bacterium_g__norank_f__norank_o__Subgroup_2	ASV3749	31	3.5073e-05	0	31	0	0	0	0	0	0	0	0	0	0	0	0	0	0
d__Bacteria	k__norank_d__Bacteria	p__Proteobacteria	c__Gammaproteobacteria	o__Burkholderiales	f__Rhodocyclaceae	g__Thauera	s__unclassified_g__Thauera	ASV2644	29	3.28102e-05	0	0	29	0	0	0	0	0	0	0	0	0	0	0	0	0
d__Bacteria	k__norank_d__Bacteria	p__Firmicutes	c__Bacilli	o__Staphylococcales	f__Staphylococcaceae	g__Staphylococcus	s__unclassified_g__Staphylococcus	ASV1915	32	3.62043e-05	0	6	0	26	0	0	0	0	0	0	0	0	0	0	0	0
d__Bacteria	k__norank_d__Bacteria	p__Proteobacteria	c__Gammaproteobacteria	o__Enterobacterales	f__Enterobacteriaceae	g__unclassified_f__Enterobacteriaceae	s__unclassified_f__Enterobacteriaceae	ASV1869	33	3.73357e-05	0	0	0	33	0	0	0	0	0	0	0	0	0	0	0	0
d__Bacteria	k__norank_d__Bacteria	p__Proteobacteria	c__Gammaproteobacteria	o__Pseudomonadales	f__Pseudomonadaceae	g__Pseudomonas	s__unclassified_g__Pseudomonas	ASV1867	30	3.39416e-05	0	0	0	30	0	0	0	0	0	0	0	0	0	0	0	0
d__Bacteria	k__norank_d__Bacteria	p__Firmicutes	c__Clostridia	o__Christensenellales	f__Christensenellaceae	g__Christensenellaceae_R-7_group	s__unclassified_g__Christensenellaceae_R-7_group	ASV2700	33	3.73357e-05	0	0	27	0	0	0	6	0	0	0	0	0	0	0	0	0
d__Bacteria	k__norank_d__Bacteria	p__Bacteroidota	c__Bacteroidia	o__Bacteroidales	f__Dysgonomonadaceae	g__Fermentimonas	s__uncultured_prokaryote_g__Fermentimonas	ASV4749	28	3.16788e-05	0	0	0	0	0	0	0	28	0	0	0	0	0	0	0	0
d__Bacteria	k__norank_d__Bacteria	p__Acidobacteriota	c__Acidobacteriae	o__Bryobacterales	f__Bryobacteraceae	g__Bryobacter	s__unclassified_g__Bryobacter	ASV3751	30	3.39416e-05	0	30	0	0	0	0	0	0	0	0	0	0	0	0	0	0
d__Bacteria	k__norank_d__Bacteria	p__Bacteroidota	c__Bacteroidia	o__Bacteroidales	f__Bacteroidaceae	g__Bacteroides	s__unclassified_g__Bacteroides	ASV1296	33	3.73357e-05	0	0	0	0	0	5	28	0	0	0	0	0	0	0	0	0
d__Bacteria	k__norank_d__Bacteria	p__Actinobacteriota	c__Actinobacteria	o__Streptomycetales	f__Streptomycetaceae	g__Streptacidiphilus	s__unclassified_g__Streptacidiphilus	ASV3746	32	3.62043e-05	0	32	0	0	0	0	0	0	0	0	0	0	0	0	0	0
d__Bacteria	k__norank_d__Bacteria	p__Proteobacteria	c__Gammaproteobacteria	o__Burkholderiales	f__Oxalobacteraceae	g__Massilia	s__unclassified_g__Massilia	ASV1866	34	3.84671e-05	0	0	0	34	0	0	0	0	0	0	0	0	0	0	0	0
d__Bacteria	k__norank_d__Bacteria	p__Bacteroidota	c__Bacteroidia	o__Flavobacteriales	f__Flavobacteriaceae	g__Flavobacterium	s__unclassified_g__Flavobacterium	ASV2643	30	3.39416e-05	0	0	30	0	0	0	0	0	0	0	0	0	0	0	0	0
d__Bacteria	k__norank_d__Bacteria	p__Planctomycetota	c__Phycisphaerae	o__Phycisphaerales	f__Phycisphaeraceae	g__SM1A02	s__metagenome_g__SM1A02	ASV99	30	3.39416e-05	0	0	0	0	0	0	0	0	0	0	3	0	0	6	21	0
d__Bacteria	k__norank_d__Bacteria	p__Actinobacteriota	c__Thermoleophilia	o__Gaiellales	f__norank_o__Gaiellales	g__norank_f__norank_o__Gaiellales	s__uncultured_Conexibacter_sp._g__norank	ASV3744	33	3.73357e-05	0	33	0	0	0	0	0	0	0	0	0	0	0	0	0	0
d__Bacteria	k__norank_d__Bacteria	p__TX1A-33	c__norank_p__TX1A-33	o__norank_c__norank	f__norank_o__norank	g__norank_f__norank	s__uncultured_bacterium_g__norank_f__norank	ASV1865	34	3.84671e-05	0	0	0	34	0	0	0	0	0	0	0	0	0	0	0	0
d__Bacteria	k__norank_d__Bacteria	p__Proteobacteria	c__Alphaproteobacteria	o__Elsterales	f__norank_o__Elsterales	g__norank_f__norank_o__Elsterales	s__uncultured_bacterium_g__norank_f__norank_o__Elsterales	ASV3756	32	3.62043e-05	0	32	0	0	0	0	0	0	0	0	0	0	0	0	0	0
d__Bacteria	k__norank_d__Bacteria	p__Firmicutes	c__Clostridia	o__Oscillospirales	f__Ruminococcaceae	g__unclassified_f__Ruminococcaceae	s__unclassified_f__Ruminococcaceae	ASV2641	32	3.62043e-05	0	0	32	0	0	0	0	0	0	0	0	0	0	0	0	0
d__Bacteria	k__norank_d__Bacteria	p__Actinobacteriota	c__Actinobacteria	o__Frankiales	f__Acidothermaceae	g__Acidothermus	s__unclassified_g__Acidothermus	ASV3753	30	3.39416e-05	0	30	0	0	0	0	0	0	0	0	0	0	0	0	0	0
d__Bacteria	k__norank_d__Bacteria	p__Actinobacteriota	c__Actinobacteria	o__Micrococcales	f__Micrococcaceae	g__Glutamicibacter	s__unclassified_g__Glutamicibacter	ASV3745	32	3.62043e-05	0	32	0	0	0	0	0	0	0	0	0	0	0	0	0	0
d__Bacteria	k__norank_d__Bacteria	p__Firmicutes	c__Bacilli	o__Bacillales	f__Planococcaceae	g__unclassified_f__Planococcaceae	s__unclassified_f__Planococcaceae	ASV481	26	2.9416e-05	0	0	0	0	7	0	0	0	6	0	0	0	13	0	0	0
d__Bacteria	k__norank_d__Bacteria	p__Actinobacteriota	c__Thermoleophilia	o__Gaiellales	f__norank_o__Gaiellales	g__norank_f__norank_o__Gaiellales	s__unclassified_g__norank_f__norank_o__Gaiellales	ASV3757	32	3.62043e-05	0	32	0	0	0	0	0	0	0	0	0	0	0	0	0	0
d__Bacteria	k__norank_d__Bacteria	p__Acidobacteriota	c__Acidobacteriae	o__Subgroup_2	f__norank_o__Subgroup_2	g__norank_f__norank_o__Subgroup_2	s__unclassified_g__norank_f__norank_o__Subgroup_2	ASV3084	28	3.16788e-05	0	0	0	0	0	0	8	8	2	0	0	0	0	0	10	0
d__Bacteria	k__norank_d__Bacteria	p__Actinobacteriota	c__Actinobacteria	o__Corynebacteriales	f__Mycobacteriaceae	g__Mycobacterium	s__unclassified_g__Mycobacterium	ASV3747	29	3.28102e-05	0	29	0	0	0	0	0	0	0	0	0	0	0	0	0	0
d__Bacteria	k__norank_d__Bacteria	p__Proteobacteria	c__Alphaproteobacteria	o__Rhizobiales	f__Beijerinckiaceae	g__unclassified_f__Beijerinckiaceae	s__unclassified_f__Beijerinckiaceae	ASV632	33	3.73357e-05	0	0	0	0	6	2	10	13	0	0	0	0	2	0	0	0
d__Bacteria	k__norank_d__Bacteria	p__Myxococcota	c__Polyangia	o__mle1-27	f__norank_o__mle1-27	g__norank_f__norank_o__mle1-27	s__metagenome_g__norank_f__norank_o__mle1-27	ASV2642	30	3.39416e-05	0	0	30	0	0	0	0	0	0	0	0	0	0	0	0	0
d__Bacteria	k__norank_d__Bacteria	p__Bacteroidota	c__Bacteroidia	o__Flavobacteriales	f__Flavobacteriaceae	g__Flavobacterium	s__unclassified_g__Flavobacterium	ASV2314	30	3.39416e-05	0	24	0	0	0	0	0	0	4	0	2	0	0	0	0	0
d__Bacteria	k__norank_d__Bacteria	p__Proteobacteria	c__Gammaproteobacteria	o__Burkholderiales	f__Burkholderiaceae	g__Burkholderia-Caballeronia-Paraburkholderia	s__unclassified_g__Burkholderia-Caballeronia-Paraburkholderia	ASV3755	29	3.28102e-05	0	29	0	0	0	0	0	0	0	0	0	0	0	0	0	0
d__Bacteria	k__norank_d__Bacteria	p__Acidobacteriota	c__Acidobacteriae	o__Acidobacteriales	f__norank_o__Acidobacteriales	g__norank_f__norank_o__Acidobacteriales	s__unclassified_g__norank_f__norank_o__Acidobacteriales	ASV3750	31	3.5073e-05	0	31	0	0	0	0	0	0	0	0	0	0	0	0	0	0
d__Bacteria	k__norank_d__Bacteria	p__Firmicutes	c__Clostridia	o__Clostridiales	f__Clostridiaceae	g__Clostridium_sensu_stricto_7	s__unclassified_g__Clostridium_sensu_stricto_7	ASV5254	30	3.39416e-05	0	0	0	0	0	0	0	0	0	0	0	0	0	0	30	0
d__Bacteria	k__norank_d__Bacteria	p__Proteobacteria	c__Gammaproteobacteria	o__Burkholderiales	f__Burkholderiaceae	g__Burkholderia-Caballeronia-Paraburkholderia	s__unclassified_g__Burkholderia-Caballeronia-Paraburkholderia	ASV3752	34	3.84671e-05	0	34	0	0	0	0	0	0	0	0	0	0	0	0	0	0
d__Bacteria	k__norank_d__Bacteria	p__Firmicutes	c__Clostridia	o__Oscillospirales	f__Oscillospiraceae	g__unclassified_f__Oscillospiraceae	s__unclassified_f__Oscillospiraceae	ASV1232	29	3.28102e-05	0	0	0	0	0	6	19	0	0	0	4	0	0	0	0	0
d__Bacteria	k__norank_d__Bacteria	p__Bacteroidota	c__Bacteroidia	o__Bacteroidales	f__Bacteroidaceae	g__Bacteroides	s__unclassified_g__Bacteroides	ASV1074	33	3.73357e-05	0	0	0	0	0	14	19	0	0	0	0	0	0	0	0	0
d__Bacteria	k__norank_d__Bacteria	p__Bacteroidota	c__Bacteroidia	o__Flavobacteriales	f__Weeksellaceae	g__Chryseobacterium	s__unclassified_g__Chryseobacterium	ASV1864	34	3.84671e-05	0	0	0	34	0	0	0	0	0	0	0	0	0	0	0	0
d__Bacteria	k__norank_d__Bacteria	p__Firmicutes	c__Bacilli	o__unclassified_c__Bacilli	f__unclassified_c__Bacilli	g__unclassified_c__Bacilli	s__unclassified_c__Bacilli	ASV2196	29	3.28102e-05	29	0	0	0	0	0	0	0	0	0	0	0	0	0	0	0
d__Bacteria	k__norank_d__Bacteria	p__Verrucomicrobiota	c__Verrucomicrobiae	o__Pedosphaerales	f__Pedosphaeraceae	g__Ellin516	s__unclassified_g__Ellin516	ASV3748	32	3.62043e-05	0	32	0	0	0	0	0	0	0	0	0	0	0	0	0	0
d__Bacteria	k__norank_d__Bacteria	p__Proteobacteria	c__Gammaproteobacteria	o__Burkholderiales	f__Rhodocyclaceae	g__Zoogloea	s__unclassified_g__Zoogloea	ASV1871	32	3.62043e-05	0	0	0	32	0	0	0	0	0	0	0	0	0	0	0	0
d__Bacteria	k__norank_d__Bacteria	p__Acidobacteriota	c__Acidobacteriae	o__Subgroup_2	f__norank_o__Subgroup_2	g__norank_f__norank_o__Subgroup_2	s__uncultured_Acidobacteriales_bacterium_g__norank_f__norank_o__Subgroup_2	ASV3754	33	3.73357e-05	0	33	0	0	0	0	0	0	0	0	0	0	0	0	0	0
d__Bacteria	k__norank_d__Bacteria	p__Actinobacteriota	c__Actinobacteria	o__Micrococcales	f__Microbacteriaceae	g__Microbacterium	s__unclassified_g__Microbacterium	ASV2640	33	3.73357e-05	0	0	33	0	0	0	0	0	0	0	0	0	0	0	0	0
d__Bacteria	k__norank_d__Bacteria	p__Firmicutes	c__Bacilli	o__Lactobacillales	f__Carnobacteriaceae	g__Carnobacterium	s__unclassified_g__Carnobacterium	ASV1868	31	3.5073e-05	0	0	0	31	0	0	0	0	0	0	0	0	0	0	0	0
d__Bacteria	k__norank_d__Bacteria	p__Proteobacteria	c__Alphaproteobacteria	o__Acetobacterales	f__Acetobacteraceae	g__Acidiphilium	s__uncultured_bacterium_g__Acidiphilium	ASV2283	32	3.62043e-05	0	27	0	0	0	0	0	0	0	0	5	0	0	0	0	0
d__Bacteria	k__norank_d__Bacteria	p__Deinococcota	c__Deinococci	o__Deinococcales	f__Trueperaceae	g__Truepera	s__uncultured_Deinococci_bacterium_g__Truepera	ASV4750	30	3.39416e-05	0	0	0	0	0	0	0	30	0	0	0	0	0	0	0	0
d__Bacteria	k__norank_d__Bacteria	p__Actinobacteriota	c__Thermoleophilia	o__Solirubrobacterales	f__67-14	g__norank_f__67-14	s__unclassified_g__norank_f__67-14	ASV3766	28	3.16788e-05	0	28	0	0	0	0	0	0	0	0	0	0	0	0	0	0
d__Bacteria	k__norank_d__Bacteria	p__Proteobacteria	c__Gammaproteobacteria	o__Burkholderiales	f__Rhodocyclaceae	g__Dechloromonas	s__unclassified_g__Dechloromonas	ASV2658	28	3.16788e-05	0	0	28	0	0	0	0	0	0	0	0	0	0	0	0	0
d__Bacteria	k__norank_d__Bacteria	p__Firmicutes	c__Clostridia	o__Clostridia_UCG-014	f__norank_o__Clostridia_UCG-014	g__norank_f__norank_o__Clostridia_UCG-014	s__unclassified_g__norank_f__norank_o__Clostridia_UCG-014	ASV66	30	3.39416e-05	0	0	0	0	7	0	8	7	0	0	0	0	0	8	0	0
d__Bacteria	k__norank_d__Bacteria	p__Actinobacteriota	c__Actinobacteria	o__Frankiales	f__Acidothermaceae	g__Acidothermus	s__unclassified_g__Acidothermus	ASV3771	31	3.5073e-05	0	31	0	0	0	0	0	0	0	0	0	0	0	0	0	0
d__Bacteria	k__norank_d__Bacteria	p__Actinobacteriota	c__Actinobacteria	o__Pseudonocardiales	f__Pseudonocardiaceae	g__Pseudonocardia	s__unclassified_g__Pseudonocardia	ASV2646	27	3.05474e-05	0	0	27	0	0	0	0	0	0	0	0	0	0	0	0	0
d__Bacteria	k__norank_d__Bacteria	p__Acidobacteriota	c__Acidobacteriae	o__Acidobacteriales	f__Acidobacteriaceae_Subgroup_1	g__unclassified_f__Acidobacteriaceae_Subgroup_1	s__unclassified_f__Acidobacteriaceae_Subgroup_1	ASV2648	30	3.39416e-05	0	0	30	0	0	0	0	0	0	0	0	0	0	0	0	0
d__Bacteria	k__norank_d__Bacteria	p__Chloroflexi	c__TK10	o__norank_c__TK10	f__norank_o__norank_c__TK10	g__norank_f__norank_o__norank_c__TK10	s__uncultured_bacterium_g__norank_f__norank_o__norank_c__TK10	ASV3764	31	3.5073e-05	0	31	0	0	0	0	0	0	0	0	0	0	0	0	0	0
d__Bacteria	k__norank_d__Bacteria	p__Actinobacteriota	c__Actinobacteria	o__Propionibacteriales	f__Propionibacteriaceae	g__Tessaracoccus	s__unclassified_g__Tessaracoccus	ASV2650	28	3.16788e-05	0	0	28	0	0	0	0	0	0	0	0	0	0	0	0	0
d__Bacteria	k__norank_d__Bacteria	p__Proteobacteria	c__Alphaproteobacteria	o__Rhizobiales	f__unclassified_o__Rhizobiales	g__unclassified_o__Rhizobiales	s__unclassified_o__Rhizobiales	ASV2653	30	3.39416e-05	0	0	30	0	0	0	0	0	0	0	0	0	0	0	0	0
d__Bacteria	k__norank_d__Bacteria	p__Actinobacteriota	c__Thermoleophilia	o__Solirubrobacterales	f__Solirubrobacteraceae	g__Conexibacter	s__unclassified_g__Conexibacter	ASV4752	27	3.05474e-05	0	0	0	0	0	0	0	27	0	0	0	0	0	0	0	0
d__Bacteria	k__norank_d__Bacteria	p__Bacteroidota	c__Bacteroidia	o__Bacteroidales	f__Rikenellaceae	g__Alistipes	s__unclassified_g__Alistipes	ASV2938	32	3.62043e-05	0	0	0	0	0	0	32	0	0	0	0	0	0	0	0	0
d__Bacteria	k__norank_d__Bacteria	p__Bacteroidota	c__Bacteroidia	o__Bacteroidales	f__Paludibacteraceae	g__Paludibacter	s__uncultured_bacterium_g__Paludibacter	ASV2656	31	3.5073e-05	0	0	31	0	0	0	0	0	0	0	0	0	0	0	0	0
d__Bacteria	k__norank_d__Bacteria	p__Firmicutes	c__Clostridia	o__Lachnospirales	f__Lachnospiraceae	g__unclassified_f__Lachnospiraceae	s__unclassified_f__Lachnospiraceae	ASV2647	29	3.28102e-05	0	0	29	0	0	0	0	0	0	0	0	0	0	0	0	0
d__Bacteria	k__norank_d__Bacteria	p__Bacteroidota	c__Bacteroidia	o__Bacteroidales	f__Bacteroidaceae	g__Bacteroides	s__unclassified_g__Bacteroides	ASV423	28	3.16788e-05	0	0	0	0	15	0	13	0	0	0	0	0	0	0	0	0
d__Bacteria	k__norank_d__Bacteria	p__Proteobacteria	c__Gammaproteobacteria	o__Enterobacterales	f__Enterobacteriaceae	g__unclassified_f__Enterobacteriaceae	s__unclassified_f__Enterobacteriaceae	ASV1875	30	3.39416e-05	0	0	0	30	0	0	0	0	0	0	0	0	0	0	0	0
d__Bacteria	k__norank_d__Bacteria	p__Acidobacteriota	c__Acidobacteriae	o__Acidobacteriales	f__Acidobacteriaceae_Subgroup_1	g__unclassified_f__Acidobacteriaceae_Subgroup_1	s__unclassified_f__Acidobacteriaceae_Subgroup_1	ASV2251	28	3.16788e-05	0	0	0	0	0	0	20	0	0	0	8	0	0	0	0	0
d__Bacteria	k__norank_d__Bacteria	p__Actinobacteriota	c__Actinobacteria	o__Frankiales	f__Geodermatophilaceae	g__Modestobacter	s__unclassified_g__Modestobacter	ASV3073	28	3.16788e-05	0	0	0	0	0	0	10	18	0	0	0	0	0	0	0	0
d__Bacteria	k__norank_d__Bacteria	p__Bacteroidota	c__Bacteroidia	o__Flavobacteriales	f__Weeksellaceae	g__Chryseobacterium	s__unclassified_g__Chryseobacterium	ASV1872	31	3.5073e-05	0	0	0	31	0	0	0	0	0	0	0	0	0	0	0	0
d__Bacteria	k__norank_d__Bacteria	p__Proteobacteria	c__Alphaproteobacteria	o__Micropepsales	f__Micropepsaceae	g__norank_f__Micropepsaceae	s__uncultured_bacterium_g__norank_f__Micropepsaceae	ASV2657	28	3.16788e-05	0	0	28	0	0	0	0	0	0	0	0	0	0	0	0	0
d__Bacteria	k__norank_d__Bacteria	p__Chloroflexi	c__Ktedonobacteria	o__Ktedonobacterales	f__JG30-KF-AS9	g__norank_f__JG30-KF-AS9	s__uncultured_bacterium_g__norank_f__JG30-KF-AS9	ASV3763	28	3.16788e-05	0	28	0	0	0	0	0	0	0	0	0	0	0	0	0	0
d__Bacteria	k__norank_d__Bacteria	p__Bacteroidota	c__Bacteroidia	o__Bacteroidales	f__Bacteroidaceae	g__Bacteroides	s__unclassified_g__Bacteroides	ASV3760	32	3.62043e-05	0	32	0	0	0	0	0	0	0	0	0	0	0	0	0	0
d__Bacteria	k__norank_d__Bacteria	p__Actinobacteriota	c__Actinobacteria	o__Propionibacteriales	f__Nocardioidaceae	g__Nocardioides	s__unclassified_g__Nocardioides	ASV2645	28	3.16788e-05	0	0	28	0	0	0	0	0	0	0	0	0	0	0	0	0
d__Bacteria	k__norank_d__Bacteria	p__Firmicutes	c__Clostridia	o__Clostridiales	f__Clostridiaceae	g__Candidatus_Arthromitus	s__unclassified_g__Candidatus_Arthromitus	ASV2649	32	3.62043e-05	0	0	32	0	0	0	0	0	0	0	0	0	0	0	0	0
d__Bacteria	k__norank_d__Bacteria	p__Acidobacteriota	c__Acidobacteriae	o__Solibacterales	f__Solibacteraceae	g__Candidatus_Solibacter	s__unclassified_g__Candidatus_Solibacter	ASV3761	31	3.5073e-05	0	31	0	0	0	0	0	0	0	0	0	0	0	0	0	0
d__Bacteria	k__norank_d__Bacteria	p__Proteobacteria	c__Alphaproteobacteria	o__Sphingomonadales	f__Sphingomonadaceae	g__Sphingobium	s__unclassified_g__Sphingobium	ASV518	29	3.28102e-05	0	22	0	0	7	0	0	0	0	0	0	0	0	0	0	0
d__Bacteria	k__norank_d__Bacteria	p__Proteobacteria	c__Alphaproteobacteria	o__Rhizobiales	f__Xanthobacteraceae	g__norank_f__Xanthobacteraceae	s__unclassified_g__norank_f__Xanthobacteraceae	ASV3772	31	3.5073e-05	0	31	0	0	0	0	0	0	0	0	0	0	0	0	0	0
d__Bacteria	k__norank_d__Bacteria	p__Actinobacteriota	c__Acidimicrobiia	o__norank_c__Acidimicrobiia	f__norank_o__norank_c__Acidimicrobiia	g__norank_f__norank_o__norank_c__Acidimicrobiia	s__unclassified_g__norank_f__norank_o__norank_c__Acidimicrobiia	ASV3769	33	3.73357e-05	0	33	0	0	0	0	0	0	0	0	0	0	0	0	0	0
d__Bacteria	k__norank_d__Bacteria	p__Proteobacteria	c__Gammaproteobacteria	o__Burkholderiales	f__Burkholderiaceae	g__Limnobacter	s__unclassified_g__Limnobacter	ASV3768	33	3.73357e-05	0	33	0	0	0	0	0	0	0	0	0	0	0	0	0	0
d__Bacteria	k__norank_d__Bacteria	p__Chloroflexi	c__TK10	o__norank_c__TK10	f__norank_o__norank_c__TK10	g__norank_f__norank_o__norank_c__TK10	s__unclassified_g__norank_f__norank_o__norank_c__TK10	ASV3767	29	3.28102e-05	0	29	0	0	0	0	0	0	0	0	0	0	0	0	0	0
d__Bacteria	k__norank_d__Bacteria	p__Proteobacteria	c__Alphaproteobacteria	o__Sphingomonadales	f__Sphingomonadaceae	g__Sphingomonas	s__unclassified_g__Sphingomonas	ASV3762	31	3.5073e-05	0	31	0	0	0	0	0	0	0	0	0	0	0	0	0	0
d__Bacteria	k__norank_d__Bacteria	p__Firmicutes	c__Bacilli	o__Lactobacillales	f__Enterococcaceae	g__Enterococcus	s__unclassified_g__Enterococcus	ASV1070	29	3.28102e-05	0	0	0	0	0	14	15	0	0	0	0	0	0	0	0	0
d__Bacteria	k__norank_d__Bacteria	p__Chloroflexi	c__Ktedonobacteria	o__Ktedonobacterales	f__Ktedonobacteraceae	g__FCPS473	s__uncultured_Thermosporotrichaceae_bacterium_g__FCPS473	ASV3759	31	3.5073e-05	0	31	0	0	0	0	0	0	0	0	0	0	0	0	0	0
d__Bacteria	k__norank_d__Bacteria	p__Acidobacteriota	c__Acidobacteriae	o__Acidobacteriales	f__norank_o__Acidobacteriales	g__norank_f__norank_o__Acidobacteriales	s__unclassified_g__norank_f__norank_o__Acidobacteriales	ASV3770	31	3.5073e-05	0	31	0	0	0	0	0	0	0	0	0	0	0	0	0	0
d__Bacteria	k__norank_d__Bacteria	p__Proteobacteria	c__Gammaproteobacteria	o__Burkholderiales	f__Rhodocyclaceae	g__unclassified_f__Rhodocyclaceae	s__unclassified_f__Rhodocyclaceae	ASV2652	32	3.62043e-05	0	0	32	0	0	0	0	0	0	0	0	0	0	0	0	0
d__Bacteria	k__norank_d__Bacteria	p__Proteobacteria	c__Gammaproteobacteria	o__Burkholderiales	f__Rhodocyclaceae	g__unclassified_f__Rhodocyclaceae	s__unclassified_f__Rhodocyclaceae	ASV1874	30	3.39416e-05	0	0	0	30	0	0	0	0	0	0	0	0	0	0	0	0
d__Bacteria	k__norank_d__Bacteria	p__Proteobacteria	c__Gammaproteobacteria	o__Burkholderiales	f__Burkholderiaceae	g__Burkholderia-Caballeronia-Paraburkholderia	s__unclassified_g__Burkholderia-Caballeronia-Paraburkholderia	ASV3758	27	3.05474e-05	0	27	0	0	0	0	0	0	0	0	0	0	0	0	0	0
d__Bacteria	k__norank_d__Bacteria	p__Proteobacteria	c__Gammaproteobacteria	o__Burkholderiales	f__Rhodocyclaceae	g__unclassified_f__Rhodocyclaceae	s__unclassified_f__Rhodocyclaceae	ASV2655	33	3.73357e-05	0	0	33	0	0	0	0	0	0	0	0	0	0	0	0	0
d__Bacteria	k__norank_d__Bacteria	p__Firmicutes	c__Clostridia	o__Christensenellales	f__Christensenellaceae	g__Christensenellaceae_R-7_group	s__unclassified_g__Christensenellaceae_R-7_group	ASV2659	29	3.28102e-05	0	0	29	0	0	0	0	0	0	0	0	0	0	0	0	0
d__Bacteria	k__norank_d__Bacteria	p__Proteobacteria	c__Gammaproteobacteria	o__Enterobacterales	f__unclassified_o__Enterobacterales	g__unclassified_o__Enterobacterales	s__unclassified_o__Enterobacterales	ASV2198	30	3.39416e-05	30	0	0	0	0	0	0	0	0	0	0	0	0	0	0	0
d__Bacteria	k__norank_d__Bacteria	p__Proteobacteria	c__Alphaproteobacteria	o__Rhizobiales	f__Rhodomicrobiaceae	g__Rhodomicrobium	s__unclassified_g__Rhodomicrobium	ASV3781	30	3.39416e-05	0	30	0	0	0	0	0	0	0	0	0	0	0	0	0	0
d__Bacteria	k__norank_d__Bacteria	p__Actinobacteriota	c__Actinobacteria	o__Corynebacteriales	f__Mycobacteriaceae	g__Mycobacterium	s__unclassified_g__Mycobacterium	ASV739	29	3.28102e-05	0	0	22	0	5	0	0	0	0	0	2	0	0	0	0	0
d__Bacteria	k__norank_d__Bacteria	p__Proteobacteria	c__Gammaproteobacteria	o__Gammaproteobacteria_Incertae_Sedis	f__unclassified_o__Gammaproteobacteria_Incertae_Sedis	g__Acidibacter	s__unclassified_g__Acidibacter	ASV3782	32	3.62043e-05	0	32	0	0	0	0	0	0	0	0	0	0	0	0	0	0
d__Bacteria	k__norank_d__Bacteria	p__Proteobacteria	c__Alphaproteobacteria	o__Sphingomonadales	f__Sphingomonadaceae	g__Sphingomonas	s__unclassified_g__Sphingomonas	ASV2197	23	2.60219e-05	23	0	0	0	0	0	0	0	0	0	0	0	0	0	0	0
d__Bacteria	k__norank_d__Bacteria	p__Firmicutes	c__Clostridia	o__Lachnospirales	f__Lachnospiraceae	g__Lachnoclostridium	s__Clostridium_glycyrrhizinilyticum	ASV1037	27	3.05474e-05	0	0	0	0	0	27	0	0	0	0	0	0	0	0	0	0
d__Bacteria	k__norank_d__Bacteria	p__Proteobacteria	c__Gammaproteobacteria	o__Burkholderiales	f__Comamonadaceae	g__unclassified_f__Comamonadaceae	s__unclassified_f__Comamonadaceae	ASV1991	28	3.16788e-05	0	0	23	5	0	0	0	0	0	0	0	0	0	0	0	0
d__Bacteria	k__norank_d__Bacteria	p__Actinobacteriota	c__Thermoleophilia	o__Solirubrobacterales	f__Solirubrobacteraceae	g__norank_f__Solirubrobacteraceae	s__unclassified_g__norank_f__Solirubrobacteraceae	ASV3783	32	3.62043e-05	0	32	0	0	0	0	0	0	0	0	0	0	0	0	0	0
d__Bacteria	k__norank_d__Bacteria	p__Actinobacteriota	c__Actinobacteria	o__Propionibacteriales	f__Propionibacteriaceae	g__Propioniciclava	s__unclassified_g__Propioniciclava	ASV2660	31	3.5073e-05	0	0	31	0	0	0	0	0	0	0	0	0	0	0	0	0
d__Bacteria	k__norank_d__Bacteria	p__Actinobacteriota	c__Actinobacteria	o__Pseudonocardiales	f__Pseudonocardiaceae	g__Actinomycetospora	s__unclassified_g__Actinomycetospora	ASV3774	30	3.39416e-05	0	30	0	0	0	0	0	0	0	0	0	0	0	0	0	0
d__Bacteria	k__norank_d__Bacteria	p__Bacteroidota	c__Kapabacteria	o__Kapabacteriales	f__norank_o__Kapabacteriales	g__norank_f__norank_o__Kapabacteriales	s__unclassified_g__norank_f__norank_o__Kapabacteriales	ASV2330	32	3.62043e-05	0	0	26	0	0	0	0	0	0	0	3	0	0	0	3	0
d__Bacteria	k__norank_d__Bacteria	p__Acidobacteriota	c__Acidobacteriae	o__Subgroup_2	f__norank_o__Subgroup_2	g__norank_f__norank_o__Subgroup_2	s__unclassified_g__norank_f__norank_o__Subgroup_2	ASV3784	26	2.9416e-05	0	26	0	0	0	0	0	0	0	0	0	0	0	0	0	0
d__Bacteria	k__norank_d__Bacteria	p__Proteobacteria	c__Alphaproteobacteria	o__Acetobacterales	f__Acetobacteraceae	g__unclassified_f__Acetobacteraceae	s__unclassified_f__Acetobacteraceae	ASV3785	30	3.39416e-05	0	30	0	0	0	0	0	0	0	0	0	0	0	0	0	0
d__Bacteria	k__norank_d__Bacteria	p__Firmicutes	c__Bacilli	o__Bacillales	f__Bacillaceae	g__Sinibacillus	s__Sinibacillus_soli	ASV2975	28	3.16788e-05	0	0	0	0	0	0	18	10	0	0	0	0	0	0	0	0
d__Bacteria	k__norank_d__Bacteria	p__Actinobacteriota	c__Actinobacteria	o__Micrococcales	f__Micrococcaceae	g__Glutamicibacter	s__unclassified_g__Glutamicibacter	ASV133	29	3.28102e-05	0	0	0	0	0	21	0	0	0	0	0	3	0	5	0	0
d__Bacteria	k__norank_d__Bacteria	p__Proteobacteria	c__Alphaproteobacteria	o__Rhizobiales	f__Rhizobiaceae	g__Candidatus_Liberibacter	s__unclassified_g__Candidatus_Liberibacter	ASV1036	30	3.39416e-05	0	0	0	0	0	30	0	0	0	0	0	0	0	0	0	0
d__Bacteria	k__norank_d__Bacteria	p__Firmicutes	c__Clostridia	o__Lachnospirales	f__Lachnospiraceae	g__Fusicatenibacter	s__unclassified_g__Fusicatenibacter	ASV1879	32	3.62043e-05	0	0	0	32	0	0	0	0	0	0	0	0	0	0	0	0
d__Bacteria	k__norank_d__Bacteria	p__Proteobacteria	c__Gammaproteobacteria	o__Burkholderiales	f__Rhodocyclaceae	g__unclassified_f__Rhodocyclaceae	s__unclassified_f__Rhodocyclaceae	ASV2663	31	3.5073e-05	0	0	31	0	0	0	0	0	0	0	0	0	0	0	0	0
d__Bacteria	k__norank_d__Bacteria	p__Proteobacteria	c__Gammaproteobacteria	o__Burkholderiales	f__Rhodocyclaceae	g__Denitratisoma	s__unclassified_g__Denitratisoma	ASV2661	29	3.28102e-05	0	0	29	0	0	0	0	0	0	0	0	0	0	0	0	0
d__Bacteria	k__norank_d__Bacteria	p__Myxococcota	c__Polyangia	o__Polyangiales	f__Polyangiaceae	g__Pajaroellobacter	s__unclassified_g__Pajaroellobacter	ASV3778	30	3.39416e-05	0	30	0	0	0	0	0	0	0	0	0	0	0	0	0	0
d__Bacteria	k__norank_d__Bacteria	p__Bdellovibrionota	c__Oligoflexia	o__0319-6G20	f__norank_o__0319-6G20	g__norank_f__norank_o__0319-6G20	s__unclassified_g__norank_f__norank_o__0319-6G20	ASV3776	28	3.16788e-05	0	28	0	0	0	0	0	0	0	0	0	0	0	0	0	0
d__Bacteria	k__norank_d__Bacteria	p__Proteobacteria	c__Gammaproteobacteria	o__Burkholderiales	f__Neisseriaceae	g__unclassified_f__Neisseriaceae	s__unclassified_f__Neisseriaceae	ASV3780	28	3.16788e-05	0	28	0	0	0	0	0	0	0	0	0	0	0	0	0	0
d__Bacteria	k__norank_d__Bacteria	p__Firmicutes	c__Bacilli	o__Lactobacillales	f__Streptococcaceae	g__Streptococcus	s__Streptococcus_alactolyticus	ASV4287	32	3.62043e-05	0	14	0	0	0	0	0	0	0	0	0	0	0	0	0	18
d__Bacteria	k__norank_d__Bacteria	p__Firmicutes	c__Clostridia	o__Peptostreptococcales-Tissierellales	f__Anaerovoracaceae	g__unclassified_f__Anaerovoracaceae	s__unclassified_f__Anaerovoracaceae	ASV2662	31	3.5073e-05	0	0	31	0	0	0	0	0	0	0	0	0	0	0	0	0
d__Bacteria	k__norank_d__Bacteria	p__Acidobacteriota	c__Acidobacteriae	o__Solibacterales	f__Solibacteraceae	g__Candidatus_Solibacter	s__unclassified_g__Candidatus_Solibacter	ASV3779	29	3.28102e-05	0	29	0	0	0	0	0	0	0	0	0	0	0	0	0	0
d__Bacteria	k__norank_d__Bacteria	p__Bacteroidota	c__Bacteroidia	o__Bacteroidales	f__Bacteroidaceae	g__Bacteroides	s__unclassified_g__Bacteroides	ASV2939	31	3.5073e-05	0	0	0	0	0	0	31	0	0	0	0	0	0	0	0	0
d__Bacteria	k__norank_d__Bacteria	p__Bacteroidota	c__Bacteroidia	o__Bacteroidales	f__Bacteroidaceae	g__Bacteroides	s__unclassified_g__Bacteroides	ASV106	27	3.05474e-05	0	0	0	0	0	0	21	0	0	0	0	0	0	6	0	0
d__Bacteria	k__norank_d__Bacteria	p__Proteobacteria	c__Gammaproteobacteria	o__Burkholderiales	f__Oxalobacteraceae	g__Massilia	s__unclassified_g__Massilia	ASV1880	29	3.28102e-05	0	0	0	29	0	0	0	0	0	0	0	0	0	0	0	0
d__Bacteria	k__norank_d__Bacteria	p__Chloroflexi	c__TK10	o__norank_c__TK10	f__norank_o__norank_c__TK10	g__norank_f__norank_o__norank_c__TK10	s__unclassified_g__norank_f__norank_o__norank_c__TK10	ASV3775	32	3.62043e-05	0	32	0	0	0	0	0	0	0	0	0	0	0	0	0	0
d__Bacteria	k__norank_d__Bacteria	p__Bacteroidota	c__Bacteroidia	o__Bacteroidales	f__Prevotellaceae	g__Prevotella	s__unclassified_g__Prevotella	ASV374	27	3.05474e-05	0	0	0	0	27	0	0	0	0	0	0	0	0	0	0	0
d__Bacteria	k__norank_d__Bacteria	p__Actinobacteriota	c__Actinobacteria	o__Frankiales	f__Acidothermaceae	g__Acidothermus	s__unclassified_g__Acidothermus	ASV3777	31	3.5073e-05	0	31	0	0	0	0	0	0	0	0	0	0	0	0	0	0
d__Bacteria	k__norank_d__Bacteria	p__Actinobacteriota	c__Actinobacteria	o__Streptomycetales	f__Streptomycetaceae	g__Streptomyces	s__unclassified_g__Streptomyces	ASV1015	29	3.28102e-05	0	0	27	0	1	0	0	0	0	0	0	0	1	0	0	0
d__Bacteria	k__norank_d__Bacteria	p__Spirochaetota	c__Spirochaetia	o__Spirochaetales	f__Spirochaetaceae	g__Treponema	s__unclassified_g__Treponema	ASV2676	29	3.28102e-05	0	0	29	0	0	0	0	0	0	0	0	0	0	0	0	0
d__Bacteria	k__norank_d__Bacteria	p__Firmicutes	c__Clostridia	o__Lachnospirales	f__Lachnospiraceae	g__Anaerostipes	s__unclassified_g__Anaerostipes	ASV414	31	3.5073e-05	0	0	0	0	20	11	0	0	0	0	0	0	0	0	0	0
d__Bacteria	k__norank_d__Bacteria	p__Proteobacteria	c__Gammaproteobacteria	o__Burkholderiales	f__Rhodocyclaceae	g__Dechloromonas	s__unclassified_g__Dechloromonas	ASV1884	28	3.16788e-05	0	0	0	28	0	0	0	0	0	0	0	0	0	0	0	0
d__Bacteria	k__norank_d__Bacteria	p__Actinobacteriota	c__Actinobacteria	o__Frankiales	f__Frankiaceae	g__Jatrophihabitans	s__unclassified_g__Jatrophihabitans	ASV3799	31	3.5073e-05	0	31	0	0	0	0	0	0	0	0	0	0	0	0	0	0
d__Bacteria	k__norank_d__Bacteria	p__Firmicutes	c__Clostridia	o__Christensenellales	f__Christensenellaceae	g__Christensenellaceae_R-7_group	s__bacterium_enrichment_culture_clone_DPF35	ASV2672	27	3.05474e-05	0	0	27	0	0	0	0	0	0	0	0	0	0	0	0	0
d__Bacteria	k__norank_d__Bacteria	p__Firmicutes	c__Clostridia	o__Lachnospirales	f__Lachnospiraceae	g__Blautia	s__unclassified_g__Blautia	ASV1882	29	3.28102e-05	0	0	0	29	0	0	0	0	0	0	0	0	0	0	0	0
d__Bacteria	k__norank_d__Bacteria	p__Acidobacteriota	c__Acidobacteriae	o__Bryobacterales	f__Bryobacteraceae	g__Bryobacter	s__unclassified_g__Bryobacter	ASV3795	30	3.39416e-05	0	30	0	0	0	0	0	0	0	0	0	0	0	0	0	0
d__Bacteria	k__norank_d__Bacteria	p__RCP2-54	c__norank_p__RCP2-54	o__norank_c__norank_p__RCP2-54	f__norank_o__norank_c__norank_p__RCP2-54	g__norank_f__norank_o__norank_c__norank_p__RCP2-54	s__uncultured_Syntrophobacterales_bacterium_g__norank_f__norank_o__norank_c__norank	ASV3793	27	3.05474e-05	0	27	0	0	0	0	0	0	0	0	0	0	0	0	0	0
d__Bacteria	k__norank_d__Bacteria	p__Actinobacteriota	c__Actinobacteria	o__Streptosporangiales	f__Nocardiopsaceae	g__Thermobifida	s__Thermobifida_alba	ASV4753	30	3.39416e-05	0	0	0	0	0	0	0	30	0	0	0	0	0	0	0	0
d__Bacteria	k__norank_d__Bacteria	p__Acidobacteriota	c__Acidobacteriae	o__Bryobacterales	f__Bryobacteraceae	g__Bryobacter	s__unclassified_g__Bryobacter	ASV3800	29	3.28102e-05	0	29	0	0	0	0	0	0	0	0	0	0	0	0	0	0
d__Bacteria	k__norank_d__Bacteria	p__Actinobacteriota	c__Actinobacteria	o__Frankiales	f__unclassified_o__Frankiales	g__unclassified_o__Frankiales	s__unclassified_o__Frankiales	ASV3789	28	3.16788e-05	0	28	0	0	0	0	0	0	0	0	0	0	0	0	0	0
d__Bacteria	k__norank_d__Bacteria	p__Actinobacteriota	c__Actinobacteria	o__Micrococcales	f__Intrasporangiaceae	g__Janibacter	s__Janibacter_limosus	ASV1888	28	3.16788e-05	0	0	0	28	0	0	0	0	0	0	0	0	0	0	0	0
d__Bacteria	k__norank_d__Bacteria	p__Acidobacteriota	c__Thermoanaerobaculia	o__Thermoanaerobaculales	f__Thermoanaerobaculaceae	g__Subgroup_10	s__uncultured_prokaryote_g__Subgroup_10	ASV1883	31	3.5073e-05	0	0	0	31	0	0	0	0	0	0	0	0	0	0	0	0
d__Bacteria	k__norank_d__Bacteria	p__Bacteroidota	c__Bacteroidia	o__Flavobacteriales	f__Weeksellaceae	g__Moheibacter	s__uncultured_compost_bacterium_g__Moheibacter	ASV4754	28	3.16788e-05	0	0	0	0	0	0	0	28	0	0	0	0	0	0	0	0
d__Bacteria	k__norank_d__Bacteria	p__Actinobacteriota	c__Actinobacteria	o__Micrococcales	f__Micrococcaceae	g__unclassified_f__Micrococcaceae	s__unclassified_f__Micrococcaceae	ASV3791	31	3.5073e-05	0	31	0	0	0	0	0	0	0	0	0	0	0	0	0	0
d__Bacteria	k__norank_d__Bacteria	p__Firmicutes	c__Clostridia	o__Lachnospirales	f__Lachnospiraceae	g__Lachnotalea	s__uncultured_bacterium_g__Lachnotalea	ASV2842	26	2.9416e-05	0	15	11	0	0	0	0	0	0	0	0	0	0	0	0	0
d__Bacteria	k__norank_d__Bacteria	p__Actinobacteriota	c__Actinobacteria	o__Catenulisporales	f__Actinospicaceae	g__Actinospica	s__unclassified_g__Actinospica	ASV3798	29	3.28102e-05	0	29	0	0	0	0	0	0	0	0	0	0	0	0	0	0
d__Bacteria	k__norank_d__Bacteria	p__Proteobacteria	c__Gammaproteobacteria	o__Burkholderiales	f__Rhodocyclaceae	g__unclassified_f__Rhodocyclaceae	s__unclassified_f__Rhodocyclaceae	ASV2677	29	3.28102e-05	0	0	29	0	0	0	0	0	0	0	0	0	0	0	0	0
d__Bacteria	k__norank_d__Bacteria	p__Proteobacteria	c__Gammaproteobacteria	o__Burkholderiales	f__Aquaspirillaceae	g__Rivicola	s__unclassified_g__Rivicola	ASV2678	28	3.16788e-05	0	0	28	0	0	0	0	0	0	0	0	0	0	0	0	0
d__Bacteria	k__norank_d__Bacteria	p__Bacteroidota	c__Bacteroidia	o__Bacteroidales	f__Bacteroidaceae	g__Bacteroides	s__Bacteroides_clarus	ASV375	30	3.39416e-05	0	0	0	0	30	0	0	0	0	0	0	0	0	0	0	0
d__Bacteria	k__norank_d__Bacteria	p__Bacteroidota	c__Bacteroidia	o__Bacteroidales	f__unclassified_o__Bacteroidales	g__unclassified_o__Bacteroidales	s__unclassified_o__Bacteroidales	ASV2664	30	3.39416e-05	0	0	30	0	0	0	0	0	0	0	0	0	0	0	0	0
d__Bacteria	k__norank_d__Bacteria	p__Spirochaetota	c__Spirochaetia	o__Spirochaetales	f__Spirochaetaceae	g__Treponema	s__Treponema_zuelzerae	ASV2668	27	3.05474e-05	0	0	27	0	0	0	0	0	0	0	0	0	0	0	0	0
d__Bacteria	k__norank_d__Bacteria	p__Acidobacteriota	c__Acidobacteriae	o__Subgroup_2	f__norank_o__Subgroup_2	g__norank_f__norank_o__Subgroup_2	s__unclassified_g__norank_f__norank_o__Subgroup_2	ASV3787	29	3.28102e-05	0	29	0	0	0	0	0	0	0	0	0	0	0	0	0	0
d__Bacteria	k__norank_d__Bacteria	p__Verrucomicrobiota	c__Verrucomicrobiae	o__Pedosphaerales	f__Pedosphaeraceae	g__Ellin516	s__unclassified_g__Ellin516	ASV3792	29	3.28102e-05	0	29	0	0	0	0	0	0	0	0	0	0	0	0	0	0
d__Bacteria	k__norank_d__Bacteria	p__Proteobacteria	c__Gammaproteobacteria	o__Burkholderiales	f__SC-I-84	g__norank_f__SC-I-84	s__unclassified_g__norank_f__SC-I-84	ASV3794	29	3.28102e-05	0	29	0	0	0	0	0	0	0	0	0	0	0	0	0	0
d__Bacteria	k__norank_d__Bacteria	p__Bacteroidota	c__Bacteroidia	o__Bacteroidales	f__Paludibacteraceae	g__norank_f__Paludibacteraceae	s__unclassified_g__norank_f__Paludibacteraceae	ASV2673	31	3.5073e-05	0	0	31	0	0	0	0	0	0	0	0	0	0	0	0	0
d__Bacteria	k__norank_d__Bacteria	p__Proteobacteria	c__Gammaproteobacteria	o__Burkholderiales	f__Rhodocyclaceae	g__Dechloromonas	s__unclassified_g__Dechloromonas	ASV2674	24	2.71533e-05	0	0	24	0	0	0	0	0	0	0	0	0	0	0	0	0
d__Bacteria	k__norank_d__Bacteria	p__Acidobacteriota	c__Acidobacteriae	o__Bryobacterales	f__Bryobacteraceae	g__Bryobacter	s__unclassified_g__Bryobacter	ASV3797	28	3.16788e-05	0	28	0	0	0	0	0	0	0	0	0	0	0	0	0	0
d__Bacteria	k__norank_d__Bacteria	p__Actinobacteriota	c__Actinobacteria	o__Micrococcales	f__Intrasporangiaceae	g__unclassified_f__Intrasporangiaceae	s__unclassified_f__Intrasporangiaceae	ASV2669	26	2.9416e-05	0	0	26	0	0	0	0	0	0	0	0	0	0	0	0	0
d__Bacteria	k__norank_d__Bacteria	p__Proteobacteria	c__Gammaproteobacteria	o__Burkholderiales	f__Rhodocyclaceae	g__unclassified_f__Rhodocyclaceae	s__unclassified_f__Rhodocyclaceae	ASV2675	27	3.05474e-05	0	0	27	0	0	0	0	0	0	0	0	0	0	0	0	0
d__Bacteria	k__norank_d__Bacteria	p__Actinobacteriota	c__Thermoleophilia	o__Solirubrobacterales	f__Solirubrobacteraceae	g__Conexibacter	s__unclassified_g__Conexibacter	ASV3796	30	3.39416e-05	0	30	0	0	0	0	0	0	0	0	0	0	0	0	0	0
d__Bacteria	k__norank_d__Bacteria	p__Bacteroidota	c__Bacteroidia	o__Bacteroidales	f__Tannerellaceae	g__Macellibacteroides	s__unclassified_g__Macellibacteroides	ASV1889	25	2.82846e-05	0	0	0	25	0	0	0	0	0	0	0	0	0	0	0	0
d__Bacteria	k__norank_d__Bacteria	p__Actinobacteriota	c__Actinobacteria	o__Micrococcales	f__Microbacteriaceae	g__Leucobacter	s__unclassified_g__Leucobacter	ASV2940	31	3.5073e-05	0	0	0	0	0	0	31	0	0	0	0	0	0	0	0	0
d__Bacteria	k__norank_d__Bacteria	p__Firmicutes	c__Bacilli	o__Bacillales	f__Planococcaceae	g__Domibacillus	s__unclassified_g__Domibacillus	ASV3790	27	3.05474e-05	0	27	0	0	0	0	0	0	0	0	0	0	0	0	0	0
d__Bacteria	k__norank_d__Bacteria	p__Proteobacteria	c__Alphaproteobacteria	o__Rhizobiales	f__Rhizobiaceae	g__unclassified_f__Rhizobiaceae	s__unclassified_f__Rhizobiaceae	ASV2665	29	3.28102e-05	0	0	29	0	0	0	0	0	0	0	0	0	0	0	0	0
d__Bacteria	k__norank_d__Bacteria	p__unclassified_k__norank_d__Bacteria	c__unclassified_k__norank_d__Bacteria	o__unclassified_k__norank_d__Bacteria	f__unclassified_k__norank_d__Bacteria	g__unclassified_k__norank_d__Bacteria	s__unclassified_k__norank_d__Bacteria	ASV3788	29	3.28102e-05	0	29	0	0	0	0	0	0	0	0	0	0	0	0	0	0
d__Bacteria	k__norank_d__Bacteria	p__Proteobacteria	c__Alphaproteobacteria	o__Sphingomonadales	f__Sphingomonadaceae	g__Altererythrobacter	s__unclassified_g__Altererythrobacter	ASV2667	24	2.71533e-05	0	0	24	0	0	0	0	0	0	0	0	0	0	0	0	0
d__Bacteria	k__norank_d__Bacteria	p__Acidobacteriota	c__Acidobacteriae	o__Solibacterales	f__Solibacteraceae	g__Candidatus_Solibacter	s__unclassified_g__Candidatus_Solibacter	ASV3891	30	3.39416e-05	0	25	0	0	0	0	0	0	0	0	0	0	5	0	0	0
d__Bacteria	k__norank_d__Bacteria	p__Proteobacteria	c__Gammaproteobacteria	o__Enterobacterales	f__Enterobacteriaceae	g__unclassified_f__Enterobacteriaceae	s__unclassified_f__Enterobacteriaceae	ASV1890	31	3.5073e-05	0	0	0	31	0	0	0	0	0	0	0	0	0	0	0	0
d__Bacteria	k__norank_d__Bacteria	p__Bacteroidota	c__Bacteroidia	o__Bacteroidales	f__Paludibacteraceae	g__Paludibacter	s__uncultured_bacterium_g__Paludibacter	ASV2666	28	3.16788e-05	0	0	28	0	0	0	0	0	0	0	0	0	0	0	0	0
d__Bacteria	k__norank_d__Bacteria	p__Proteobacteria	c__Alphaproteobacteria	o__Caulobacterales	f__Caulobacteraceae	g__norank_f__Caulobacteraceae	s__unclassified_g__norank_f__Caulobacteraceae	ASV2671	30	3.39416e-05	0	0	30	0	0	0	0	0	0	0	0	0	0	0	0	0
d__Bacteria	k__norank_d__Bacteria	p__Bacteroidota	c__Bacteroidia	o__Bacteroidales	f__Tannerellaceae	g__Parabacteroides	s__unclassified_g__Parabacteroides	ASV21	28	3.16788e-05	0	0	0	0	0	0	0	0	0	0	0	0	0	28	0	0
d__Bacteria	k__norank_d__Bacteria	p__Acidobacteriota	c__Acidobacteriae	o__Solibacterales	f__Solibacteraceae	g__Candidatus_Solibacter	s__unclassified_g__Candidatus_Solibacter	ASV3786	27	3.05474e-05	0	27	0	0	0	0	0	0	0	0	0	0	0	0	0	0
d__Bacteria	k__norank_d__Bacteria	p__Firmicutes	c__Clostridia	o__Peptostreptococcales-Tissierellales	f__Peptostreptococcaceae	g__Romboutsia	s__unclassified_g__Romboutsia	ASV396	29	3.28102e-05	0	0	0	8	21	0	0	0	0	0	0	0	0	0	0	0
d__Bacteria	k__norank_d__Bacteria	p__Proteobacteria	c__Alphaproteobacteria	o__Caulobacterales	f__Caulobacteraceae	g__Brevundimonas	s__unclassified_g__Brevundimonas	ASV3305	27	3.05474e-05	0	11	0	0	0	0	0	0	0	7	0	9	0	0	0	0
d__Bacteria	k__norank_d__Bacteria	p__Actinobacteriota	c__Actinobacteria	o__Corynebacteriales	f__Nocardiaceae	g__Nocardia	s__unclassified_g__Nocardia	ASV317	27	3.05474e-05	0	0	0	0	0	0	25	0	0	0	0	0	0	2	0	0
d__Bacteria	k__norank_d__Bacteria	p__Firmicutes	c__Clostridia	o__Lachnospirales	f__Lachnospiraceae	g__Lachnospiraceae_NK4A136_group	s__Lachnospiraceae_bacterium_GAM79	ASV2687	26	2.9416e-05	0	0	26	0	0	0	0	0	0	0	0	0	0	0	0	0
[truncated: 4,121 more rows]
